# Supplementary material for: The Songbird Connectome (OSCINE-NET.ORG): Structure-Function Organization Beyond the Canonical Vocal Control Network
Source: Research Square preprint supplement (doi:10.21203/rs.3.rs-4809794/v1), 2024-08-27
Supplement: Supplementary file 1 [file 0124fac7cc15ddd9487bdca5.xlsx]

## Sheet: Nodes
Node	Superstructure	Network	Full Name and Additional Notes
A8	Midbrain		**Dopaminergic Cell Group A8** *Also know as: Retroruberal Field (RRF)*
AA	Arcopallium		**Anterior Arcopallium**
AD	Arcopallium		**Dorsal Arcopallium** *Particularly, the dorsal strip of arcopallium overlying the now-termed AI and underlying the dorsal arcopallial lamina LAD*
AH	Hypothalamus	Social Behavior Network	**Anterior Hypothalamus**
AI	Arcopallium	Rich Club	**Intermediate Arcopallium** *Encompassing all subdivisions of AI, including AIL* *Formerly: Ad, Aid*
Air Sacs	Periphery		**Air Sacs**
AIV	Arcopallium		**Ventral Intermediate Arcopallium** *the subjacent region betwixt RA and AI, and not a ventral subdivision of AI*
ALp	Thalamus		**Posterior Nucleus of the Ansa Lenticularis**
AM	Arcopallium		**Medial Arcopallium**
Area X	Striatum	Vocal Control Network	**Area X**
Av	Mesopallium	Auditory Pathway	**Avalanche**
Bas	Nidopallium		**Nucleus Basorostralis** *Formerly: Nucleus Basalis*
BSTL	Basal Forebrain		**Lateral Bed Nucleus of the Stria Terminalis** *Formerly: BSTl, Ac*
BSTM	Basal Forebrain	Social Behavior Network	**Medial Bed Nucleus of the Stria Terminalis** *Formerly: BSTm*
CDL	Hyperpallium		**Dorsolateral Corticoid Area** *Formerly: DLC*
CG	Midbrain	Social Behavior Network	**Central Gray** *Including the dopaminergic cell group A11* *Also known as: Periaqueductal Grey (PAG), especially in other vertebrates*
CLM	Mesopallium	Auditory Pathway	**Caudolateral Mesopallium** *Subregion of Caudal Mesopallium (CM)* *Formerly: cHV, clHV*
Cloacal Muscles	Periphery		**Cloacal Muscles**
CMM	Mesopallium	Auditory Pathway	**Caudomedial Mesopallium** *Subregion of Caudal Mesopallium (CM)* *Formerly: cHV, cmHV*
Cochlea	Periphery	Auditory Pathway	**Cochlea**
Cornea	Periphery		**Cornea**
CSt	Striatum		**Caudal Striatum** *Also known as: Auditory striatum*
Cu	Brainstem		**Cuneate Nucleus**
CuE	Brainstem		**External Cuneate Nucleus**
D	Midbrain		**Nucleus of Darkschewitsch**
DCN	Cerebellum		**Deep Cerebellar Nuclei** *Including CbM and CbL* *Also known as: CbN (Cerebellar Nuclei)*
DIP	Thalamus		**Dorsointermediate Thalamus, Posterios Nucleus**
DIVA	Thalamus		**Dorsointermediate Thalamus, Ventroanterior Nucleus** *Also known as: Dorsalis Intermedius Ventralis Anterior Thalami, somatosensory thalamic nucleus*
DLA	Thalamus		**Dorsolateral Thalamus, Anterior Nucleus**
DLHp	Hippocampus		**Dorsolateral subregion of Hippocampus**
DLL	Thalamus		**Dorsolateral Thalamus, Lateral Nucleus**
DLM	Thalamus	Vocal Control Network	**Dorsolateral Thalamus, Medial Nucleus**
DLP	Thalamus		**Dorsolateral Thalamus, Posterior Nucleus**
DM	Midbrain		**Dorsomedial Nucleus of the Intercollicular Complex**
DMA	Thalamus		**Dorsomedial Thalamus, Anterior Nucleus**
DMHp	Hippocampus		**Dorsomedial subregion of Hippocampus**
DMP	Thalamus		**Dorsomedial Thalamus, Posterior Nucleus**
DT (CbN)	Thalamus		**Cerebellar-recipient Dorsal Thalamus** *Also known as DTZ (Dorsal Thalamic Zone)* *As referred to by Vates et al. 1997, Person et al. 2008, Nicholson et al. 2018, Pidoux et al. 2018* *DTZ includes DLM, DMA, DMP, DLA, DLP, DIP.* *DT (CbN) is likely to include DLP and DIP, and not DMP, but as of yet is not rigorously defined by specific nuclei*
E	Nidopallium		**Entopallium** *previously called: Ectostriatum (E), Core of the Ectostriatum (Ec)*
EM	Hypothalamus		**Ectomammilary Nucleus** *Also known as the Median Emminence*
Ep	Nidopallium		**Perientopallium** *Formerly: Periectostriatum, Shell of the Ectostriatum, Ectostriatal Belt*
Expiratory Muscles	Periphery		**Expiratory Muscles**
FLM	Mesopallium		**Frontal Lateral Mesopallium**
FRL	Midbrain		**Lateral part of the Mesencephalic Reticular Formation**
FRM	Midbrain		**Medial part of the Mesencephalic Reticular Formation**
G	Brainstem		**Gracile nucleus** *Also known as: Nucleus Gracilis*
GLv	Thalamus		**Ventral portion of the Lateral Geniculate Nucleus**
GP	Basal Forebrain		**Globus Pallidus** *Formerly: Paleostriatum Primitivum (PP)*
HA (Caudal)	Hyperpallium		**Hyperpallium Apicale, Caudal Portion** *Also known as: Visual Hyperpallium, Visual Wulst* *Formerly: Hyperstriatum Accessorium*
HA (Rostral)	Hyperpallium	Rich Club	**Hyperpallium Apicale, Rostral Portion** *Also known as: Somatosensory Hyperpallium, Somatosensory Wulst* *Formerly: Hyperstriatum Accessorium*
HD	Hyperpallium		**Hyperpallium Densocellulare** *Formerly: Hyperstriatum dorsale*
HI	Hyperpallium		**Intercalated part of the Hyperpallium** *Formerly: Hyperstriatum intercalates superios (HIS)*
HVC	Nidopallium	Vocal Control Network	**HVC** *Formerly: Hyperstriatum Ventrale Pars Caudalis (HVc); High Vocal Center*
HVC Shelf	Nidopallium	Auditory Pathway	**Shelf of HVC**
Hyoid	Periphery		**Hyoid**
IC	Midbrain		**Interstitial Nucleus of Cajal**
ICo	Midbrain	Social Behavior Network	**Intercollicular Nucleus**
IHA	Hyperpallium		**Interstitial part of the Hyperpallium Apicale** *Formerly: Nucleus intercalates hyperstriatum accessorium*
ILM	Mesopallium		**Intermediate Lateral Mesopallium** *Formerly: Intermediate lateral hyperstriatum ventrale (ILHV)*
Imc	Midbrain		**Nucleus Isthmi, pars magnocellularis**
IMM	Mesopallium		**Intermediate Medial Mesopallium** *Formerly: Intermediate medial hyperstriatum ventrale (IMHV)*
Inspiratory Muscles	Periphery		**Inspiratory Muscles**
IO	Brainstem		**Inferior Olive** *medial column portion also known as: MC, mcIO*
ION	Midbrain		**Nucleus Isthmo-Opticus**
IOS	Brainstem		**Nucleus Infra-Olivarus Superior**
Ipc	Midbrain		**Nucleus Isthmi, pars parvocellularis**
IPS	Thalamus		**Nucleus Interstitio-Praetecto-Subpretectalis**
L1	Nidopallium	Auditory Pathway	**Field L1**
L2a	Nidopallium	Auditory Pathway	**Field L2a**
L2b	Nidopallium	Auditory Pathway	**Field L2b**
L3	Nidopallium	Auditory Pathway	**Field L3**
Larynx	Periphery		**Larynx**
LHb	Basal Forebrain		**Lateral Habenula**
LHy	Hypothalamus		**Lateral Hypothalamus**
LLD	Brainstem	Auditory Pathway	**Dorsal Nucleus of the Lateral Lemniscus**
LLI	Brainstem	Auditory Pathway	**Intermediate Nucleus of the Lateral Lemniscus**
LLV	Brainstem	Auditory Pathway	**Ventral Nucleus of the Lateral Lemniscus**
LM	Midbrain		**Nucleus Lentiformis Mesencephali** *Including LMm and LMl subdivisions*
LMAN	Nidopallium	Vocal Control Network	**Lateral Magnocellular Nucleus of the Anterior Nidopallium** *Including Core and Shell subdivisions* *Formerly: lMAN, MAN*
LoC	Midbrain		**Locus Coeruleus**
Lower Eyelid	Periphery		**Lower Eyelid**
Lower Jaw	Periphery		**Lower Jaw**
LPC	Midbrain		**Nucleus Laminaris Precommisuralis**
LS	Basal Forebrain	Social Behavior Network	**Lateral Septum**
LSt	Striatum		**Lateral Striatum** *Formerly: Paleostriatum Augmentatum, PA (though this term also encompassed portions of CSt)*
Lungs	Periphery		**Lungs**
MD	Mesopallium		**Dorsal Mesopallium** *Formerly: Hyperstriatum ventrale dorso-ventrale (HVdv)*
MHb	Basal Forebrain		**Medial Habenula**
MLd	Midbrain	Auditory Pathway	**Dorsal part of the Lateral Mesencephalic Nucleus**
MMAN	Nidopallium		**Medial Magnocellular Nucleus of the Anterior Nidopallium** *Formerly: mMAN*
MS	Basal Forebrain		**Medial Septum**
MSt	Striatum		**Medial Striatum** *Formerly: Lobus paraolfactorius, excluding its rostral ventromedial part (LPO)*
MV	Brainstem		**Trigeminal Motor Nucleus**
MVIId	Brainstem		**Dorsal Subnucleus of the Facial Motor Nucleus**
MVIIv	Brainstem		**Ventral Subnucleus of the Facial Motor Nucleus**
MVL	Mesopallium		**Nucleus of the Ventrolateral Mesopallium**
nA	Brainstem		**Nucleus Ambiguus**
NA	Brainstem	Auditory Pathway	**Nucleus Angularis**
NAc	Striatum		**Nucleus Accumbens**
nBOR	Midbrain		**Nucleus of the Basal Optic Root**
NCL	Nidopallium	Rich Club	**Caudolateral Nidopallium** *Includes dorsal NCL (dNCL), LMAN (Shell)-recipient NCL, Caudocentral Nidopallium (NCC)*
NCM	Nidopallium	Auditory Pathway	**Caudomedial Nidopallium**
NDB	Basal Forebrain		**Nucleus of the Diagonal Band** *Formerly: Region of fasciculus of diagonal band (FDB)*
NFL	Nidopallium		**Frontal Lateral Nidopallium** *Formerly: Frontal Lateral Neostriatum*
NFM	Nidopallium		**Frontal Medial Nidopallium** *Formerly: Frontal Medial Neostriatum*
nHpC	Basal Forebrain		**Nucleus of the Hippocampal Commissure** *Formerly: Nucleus of the Pallial Commissure (nCPa), Bed Nucleus of the Pallial Commissure*
NIf	Nidopallium	Auditory Pathway	**Nucleus Interfacialis**
nIII	Midbrain		**Nucleus of the Third Cranial Nerve** *Also known as: Oculomotor Nucleus*
NIL	Nidopallium		**Lateral Intermediate Nidopallium**
NIM	Nidopallium		**Medial Intermediate Nidopallium**
nIV	Midbrain		**Nucleus of the Fourth Cranial Nerve** *Also known as: Trochlear Nucleus*
nIXr	Brainstem		**Retrofacial Glossopharyngeal Motor Nucleus**
NL	Brainstem	Auditory Pathway	**Nucleus Laminaris**
NM	Brainstem	Auditory Pathway	**Nucleus Magnocellularis**
NR	Midbrain		**Red Nucleus** *Also known as: Nucleus Ruber*
nTOv	Thalamus		**Nucleus of the Tractus Ovoidalis**
nTS	Brainstem		**Nucleus of the Solitary Tract** *Includes parasolitary nuclei, e.g. lPs*
nTTDc	Brainstem		**Nuclei of the Descending Trigeminal Tract, pars Caudalis**
nTTDi	Brainstem		**Nuclei of the Descending Trigeminal Tract, pars Interpolaris**
nTTDo	Brainstem		**Nuclei of the Descending Trigeminal Tract, pars Oralis**
nX	Brainstem		**Motor Nucleus of the Vagus** *Also known as: Dorsal Motor Nucleus of the Vagus (DMNX)*
nXII(l)	Brainstem		**Hypoglossal Nucleus of the Twelfth Cranial Nerve, Lingual Portion**
nXII(ts)	Brainstem	Vocal Control Network	**Hypoglossal Nucleus of the Twelfth Cranial Nerve, Trachesoyringeal Portion**
OCb	Cerebellum		**Oculomotor Cerebellum** *Includes Folia VI, VII, and VIII*
OT	Midbrain	Rich Club	**Optic Tectum**
OTu	Striatum		**Olfactory Tubercle** *Also known as: Tuberculum olfactorium*
Ov (Core)	Thalamus	Auditory Pathway	**Core of Nucleus Ovoidalis**
Ov (Shell)	Thalamus		**Shell of Nucleus Ovoidalis**
PAm	Brainstem		**Nucleus Paraambiguous** *Formerly: rVRG*
paraHVC	Nidopallium		**paraHVC**
PBvl	Brainstem		**Ventrolateral Portion of the Parabrachial Nucleus**
Pineal Gland	Periphery		**Pineal Gland**
PL	Brainstem		**Lateral Pontine Nucleus** *Also known as: Pontis Lateralis*
PLL	Midbrain		**Paralateral Lemniscal Nucleus**
PM	Brainstem		**Medial Pontine Nucleus** *Also known as: Pontis Medialis*
POA	Hypothalamus		**Preoptic Area of the Hypothalamus** *not including the medial preoptic nucleus*
PoA	Basal Forebrain		**Posterior Nucleus of the Pallial Amygdala**
POM	Hypothalamus	Social Behavior Network|Rich Club	**Medial Preoptic Nucleus of the Hypothalamus** *Also know as: Medial Preoptic Area (mPOA)*
PPC	Midbrain		**Nucleus Principalis Precommissuralis**
PPT	Midbrain		**Pedunculopontine Tegmental Nucleus** *Formerly: nucleus profundus mesencephali pars ventralis, MPv*
PrV	Brainstem		**Principal Sensory Trigeminal Nucleus**
PT	Thalamus		**Nucleus Pretectalis**
PVN	Hypothalamus	Rich Club	**Paraventricular Nucleus of the Hypothalamus**
R	Brainstem		**Nucleus Raphe** *Also known as: nucleus linearis caudalis*
RA	Arcopallium	Vocal Control Network	**Robust Nucleus of the Arcopallium**
RA Cup	Arcopallium	Auditory Pathway	**Cup of the Robust Nucleus of the Arcopallium**
RAm	Brainstem		**Nucleus Retroambigualis**
Retina DGCs	Periphery		**Displaced Ganglion Cells**
Retina RGCs	Periphery		**Retinal Ganglion Cells**
RPcdl	Brainstem		**Dorsolateral part of the RPc (parvocellular reticular formation)**
RPcvm	Brainstem		**Ventromedial part of the RPc (parvocellular reticular formation)**
RPgc	Brainstem		**Reticular Nucleus of the Caudal Pons, Gigantocellular Part** *Formerly: Reticularis Pontis Oralis (RPO)*
RS	Thalamus		**Nucleus Reticularis Superior of the Thalamus** *Also known as: Reticular Nucleus, Thalamic Reticular Nucleus* *Including both dorsal (RSd) and ventral (RSv) subdivisions*
Rt	Thalamus		**Nucleus Rotundus** *Including Nucleus Triangularis (T)*
RVL	Brainstem		**Rostral Ventrolateral Medulla**
SC	Midbrain		**Subcoeruleus** *Includes both the ventral (SCv) and dorsal (SCd) portions* *Also known as: A6*
SCE	Hypothalamus		**External Cellular Stratum of the Lateral Hypothalamus**
SCN	Hypothalamus		**Suprachiasmatic Nuclei** *Including both the medial (mSCN) and visual (vSCN) nuclei*
SHb	Thalamus		**Subhabenular Nucleus**
Slu	Midbrain		**Nucleus Semilunaris** *Not to be confused with Nucleus Semilunaris Pars Ovoidalis (SPO)*
SN	Midbrain		**Substanstia Nigra** *Previously called: n. tegmenti pedunculo-pontinus pars compacta (TPC)* *Includes both the compact (SNc) and reticular (SNr) portions*
SO	Brainstem	Auditory Pathway	**Superior Olive**
SON	Hypothalamus		**Supraoptic Nuclei** *Including nucleus decussationis supraopticae ventralis (ND)*
sP	Brainstem		**Nucleus Subprincipalis**
SpA	Basal Forebrain		**Subpallial Amygdaloid Area** *Formerly: Ventral part of paleostriatum augmentatum (PA)*
SPC	Thalamus		**Parvocellular Part of the Superficial Nucleus of the Thalamus** *Also known as: Nucleus of the Septopallio-Mesencephalic Tract; Nucleus Superficialis Parvocellularis*
SpL	Thalamus		**Nucleus Spiriformis Lateralis**
SpM	Thalamus		**Nucleus Spiriformis Medialis**
SPT	Thalamus		**Nucleus Subpretectalis**
SRt	Thalamus		**Nucleus Subrotundus**
STN	Thalamus		**Subthalamic Nucleus** *Formerly: anterior nucleus of the Ansa Lenticularis (ALa)*
Syrinx	Periphery	Vocal Control Network	**Syrinx**
TnA	Basal Forebrain	Social Behavior Network	**Nucleus Taeniae of the Amygdala** *Formerly: Nucleus taeniae (Tn)*
Tongue	Periphery		**Tongue**
Tu	Hypothalamus		**Tuberal Nucleus of the Hypothalamus**
Upper Jaw	Periphery		**Upper Jaw**
Uva	Thalamus	Auditory Pathway|Rich Club	**Nucleus Uvaeformis**
VbC	Cerebellum		**Vestibular Cerebellum** *Includes Folia IXcd and X*
VeD	Brainstem		**Descending Vestibular Nucleus**
VeL	Brainstem		**Lateral Vestibular Nucleus**
VeM	Brainstem		**Medial Vestibular Nucleus**
VeS	Brainstem		**Superior Vestibular Nucleus**
VHp	Hippocampus		**Ventral subregion of Hippocampus**
VMH	Hypothalamus	Social Behavior Network	**Ventromedial Nucleus of the Hypothalamus** *Also known as: Ventromedial Hypothalamic Nucleus (VMN)*
VP	Basal Forebrain		**Ventral Pallidum** *Formerly: Ventral Paleostriatum*
VTA	Midbrain		**Ventral Tegmental Area** *Also known as: Area Tegmetal Ventralis; Ventral Tegmental Area of Tsai; Area Ventralis of Tsai (AVT)*
Wing	Periphery		**Wing**

## Sheet: Connections
Connection From	Connection To	Species	Citation and Description
A8	RA	Non-Zebra Finch	**Canary** *Serinus canaria* Appeltants, D., Ball, G. F., & Balthazart, J. (2002). The origin of catecholaminergic inputs to the song control nucleus RA in canaries. Neuroreport, 13(5), 649-653. https://doi.org/10.1097/00001756-200204160-00023 Sex: Males and Females Age: Adult Method: red latex fluospheres
AA	Ov (Core)	Zebra Finch	**Zebra Finch** *Taeniopygia guttata* Vates, G. E., Broome, B. M., Mello, C. V., & Nottebohm, F. (1996). Auditory pathways of caudal telencephalon and their relation to the song system of adult male zebra finches. The Journal of comparative neurology, 366(4), 613-642. https://doi.org/10.1002/(SICI)1096-9861(19960318)366:4<613::AID-CNE5>3.0.CO;2-7 Sex: Males Age: Adult (>P120) Method: BDA (3kDa) o…
AA	NCL	Non-Zebra Finch	**Carrion Crow** *Corvus corone* Kersten, Y., Moll, F. W., Erdle, S., & Nieder, A. (2024). Input and Output Connections of the Crow Nidopallium Caudolaterale. eNeuro, 11(4), ENEURO.0098-24.2024. https://doi.org/10.1523/ENEURO.0098-24.2024 Sex: Males Age: Adult (8-12 years) Method: retrograde CTB
AD	VTA	Zebra Finch	**Zebra Finch** *Taeniopygia guttata* Gale, S. D., Person, A. L., & Perkel, D. J. (2008). A novel basal ganglia pathway forms a loop linking a vocal learning circuit with its dopaminergic input. The Journal of comparative neurology, 508(5), 824-839. https://doi.org/10.1002/cne.21700 Sex: Males Age: Adult Method: dextran (10kDa); CTB
AD	NFL	Zebra Finch	**Zebra Finch** *Taeniopygia guttata* Sadananda, M., & Bischof, H. J. (2006). Afferentation of the lateral nidopallium: A tracing study of a brain area involved in sexual imprinting in the zebra finch *Taeniopygia guttata). Brain research, 1106(1), 111-122. https://doi.org/10.1016/j.brainres.2006.04.009 Sex: Undetermined Age: Adult Method: RITC
AD	SN	Zebra Finch	**Zebra Finch** *Taeniopygia guttata* Gale, S. D., Person, A. L., & Perkel, D. J. (2008). A novel basal ganglia pathway forms a loop linking a vocal learning circuit with its dopaminergic input. The Journal of comparative neurology, 508(5), 824-839. https://doi.org/10.1002/cne.21700 Sex: Males Age: Adult Method: dextran (10kDa); CTB
AD	AI	Zebra Finch	**Zebra Finch** *Taeniopygia guttata* Sadananda, M., Korte, S., & Bischof, H. J. (2007). Afferentation of a caudal forebrain area activated during courtship behavior: a tracing study in the zebra finch *Taeniopygia guttata). Brain research, 1184, 108-120. https://doi.org/10.1016/j.brainres.2007.09.040 Sex: Males Age: Adult Method: Rhodamine B-Isothiocyanate and Diamidino Yellow (Dihydrochloride);…
AD	CSt	Zebra Finch	**Zebra Finch** *Taeniopygia guttata* Bottjer, S. W., Brady, J. D., & Cribbs, B. (2000). Connections of a motor cortical region in zebra finches: relation to pathways for vocal learning. The Journal of comparative neurology, 420(2), 244-260. https://doi.org/10.1002/(SICI)1096-9861(20000501)420:2<244::AID-CNE7>3.0.CO;2-M Sex: Males Age: Adult Method: fluorescent tracers rhodamine dextran amine; an…
AD	MLd	Zebra Finch	**Zebra Finch** *Taeniopygia guttata* Mello, C. V., Vates, G. E., Okuhata, S., & Nottebohm, F. (1998). Descending auditory pathways in the adult male zebra finch *Taeniopygia guttata*. The Journal of comparative neurology, 395(2), 137-160. https://doi.org/10.1002/(SICI)1096-9861(19980601)395:2<137::AID-CNE1>3.0.CO;2-3 Sex: Males Age: Adult (>P120) Method: rhodamine beads
AD	Ov (Shell)	Non-Zebra Finch	**Bengalese Finch** *Lonchura striata domestica* Zeng, S., Zhang, X., Peng, W., & Zuo, M. (2004). Immunohistochemistry and neural connectivity of the Ov shell in the songbird and their evolutionary implications. The Journal of comparative neurology, 470(2), 192-209. https://doi.org/10.1002/cne.11042 Sex: Undetermined Age: Adult Method: BDA (3kDa)
AD	Ov (Core)	Zebra Finch	**Zebra Finch** *Taeniopygia guttata* Vates, G. E., Broome, B. M., Mello, C. V., & Nottebohm, F. (1996). Auditory pathways of caudal telencephalon and their relation to the song system of adult male zebra finches. The Journal of comparative neurology, 366(4), 613-642. https://doi.org/10.1002/(SICI)1096-9861(19960318)366:4<613::AID-CNE5>3.0.CO;2-7 Sex: Males Age: Adult (>P120) Method: BDA (3kDa) o…
AD	NCL	Non-Zebra Finch	**Carrion Crow** *Corvus corone* Kersten, Y., Moll, F. W., Erdle, S., & Nieder, A. (2024). Input and Output Connections of the Crow Nidopallium Caudolaterale. eNeuro, 11(4), ENEURO.0098-24.2024. https://doi.org/10.1523/ENEURO.0098-24.2024 Sex: Males Age: Adult (8-12 years) Method: retrograde CTB
AD	LSt	Zebra Finch	**Zebra Finch** *Taeniopygia guttata* Bottjer, S. W., Brady, J. D., & Cribbs, B. (2000). Connections of a motor cortical region in zebra finches: relation to pathways for vocal learning. The Journal of comparative neurology, 420(2), 244-260. https://doi.org/10.1002/(SICI)1096-9861(20000501)420:2<244::AID-CNE7>3.0.CO;2-M Sex: Males Age: Adult Method: fluorescent tracers rhodamine dextran amine; an…
AD	VMH	Zebra Finch	**Zebra Finch** *Taeniopygia guttata* Wild J. M. (2017). The ventromedial hypothalamic nucleus in the zebra finch *Taeniopygia guttata): Afferent and efferent projections in relation to the control of reproductive behavior. The Journal of comparative neurology, 525(12), 2657-2676. https://doi.org/10.1002/cne.24225 Sex: Males and Females Age: Adult Method: CTB
AD	NIL	Zebra Finch	**Zebra Finch** *Taeniopygia guttata* Sadananda, M., & Bischof, H. J. (2006). Afferentation of the lateral nidopallium: A tracing study of a brain area involved in sexual imprinting in the zebra finch *Taeniopygia guttata). Brain research, 1106(1), 111-122. https://doi.org/10.1016/j.brainres.2006.04.009 Sex: Undetermined Age: Adult Method: RITC
AD	ILM	Zebra Finch	**Zebra Finch** *Taeniopygia guttata* Bottjer, S. W., Brady, J. D., & Cribbs, B. (2000). Connections of a motor cortical region in zebra finches: relation to pathways for vocal learning. The Journal of comparative neurology, 420(2), 244-260. https://doi.org/10.1002/(SICI)1096-9861(20000501)420:2<244::AID-CNE7>3.0.CO;2-M Sex: Males Age: Adult Method: fluorescent tracers rhodamine dextran amine; an…
AD	DMP	Zebra Finch	**Zebra Finch** *Taeniopygia guttata* Foster, E. F., Mehta, R. P., & Bottjer, S. W. (1997). Axonal connections of the medial magnocellular nucleus of the anterior neostriatum in zebra finches. The Journal of comparative neurology, 382(3), 364-381. https://doi.org/10.1002/cne.903820305 Sex: Males Age: Adult Method: DiI
AD	Area X	Zebra Finch	**Zebra Finch** *Taeniopygia guttata* Castelino, C. B., Diekamp, B., & Ball, G. F. (2007). Noradrenergic projections to the song control nucleus area X of the medial striatum in male zebra finches (Taeniopygia guttata). The Journal of comparative neurology, 502(4), 544-562. https://doi.org/10.1002/cne.21337 Sex: Males Age: Adult Method: retrograde tracer CTB, anterograde tracer BDA
AD	AIV	Zebra Finch	**Zebra Finch** *Taeniopygia guttata* Paterson, A. K., & Bottjer, S. W. (2017). Cortical inter-hemispheric circuits for multimodal vocal learning in songbirds. The Journal of comparative neurology, 525(15), 3312-3340. https://doi.org/10.1002/cne.24280 Sex: Males Age: Adult (100-180 dph) Method: Fluorescently conjugated CTB and dextran amines
AI	SpM	Zebra Finch	**Zebra Finch** *Taeniopygia guttata* Bottjer, S. W., Brady, J. D., & Cribbs, B. (2000). Connections of a motor cortical region in zebra finches: relation to pathways for vocal learning. The Journal of comparative neurology, 420(2), 244-260. https://doi.org/10.1002/(SICI)1096-9861(20000501)420:2<244::AID-CNE7>3.0.CO;2-M Sex: Males Age: Adult Method: fluorescent tracers rhodamine dextran amine; an…
AI	DIP	Zebra Finch	**Zebra Finch** *Taeniopygia guttata* Bottjer, S. W., Brady, J. D., & Cribbs, B. (2000). Connections of a motor cortical region in zebra finches: relation to pathways for vocal learning. The Journal of comparative neurology, 420(2), 244-260. https://doi.org/10.1002/(SICI)1096-9861(20000501)420:2<244::AID-CNE7>3.0.CO;2-M Sex: Males Age: Adult Method: fluorescent tracers rhodamine dextran amine; an…
AI	Area X	Zebra Finch	**Zebra Finch** *Taeniopygia guttata* Castelino, C. B., Diekamp, B., & Ball, G. F. (2007). Noradrenergic projections to the song control nucleus area X of the medial striatum in male zebra finches (Taeniopygia guttata). The Journal of comparative neurology, 502(4), 544-562. https://doi.org/10.1002/cne.21337 Sex: Males Age: Adult Method: retrograde tracer CTB, anterograde tracer BDA
AI	MLd	Zebra Finch	**Zebra Finch** *Taeniopygia guttata* Mello, C. V., Vates, G. E., Okuhata, S., & Nottebohm, F. (1998). Descending auditory pathways in the adult male zebra finch *Taeniopygia guttata*. The Journal of comparative neurology, 395(2), 137-160. https://doi.org/10.1002/(SICI)1096-9861(19980601)395:2<137::AID-CNE1>3.0.CO;2-3 Sex: Males Age: Adult (>P120) Method: rhodamine beads
AI	nTTDc	Zebra Finch|Non-Zebra Finch	**Zebra Finch** *Taeniopygia guttata* Wild, J. M., & Krützfeldt, N. E. (2012). Trigeminal and telencephalic projections to jaw and other upper vocal tract premotor neurons in songbirds: sensorimotor circuitry for beak movements during singing. The Journal of comparative neurology, 520(3), 590-605. https://doi.org/10.1002/cne.22752 Sex: Males Age: Adult Method: CTB, BDA (10kDa) --- **Canary** *Ser…
AI	PT	Zebra Finch	**Zebra Finch** *Taeniopygia guttata* Bottjer, S. W., Brady, J. D., & Cribbs, B. (2000). Connections of a motor cortical region in zebra finches: relation to pathways for vocal learning. The Journal of comparative neurology, 420(2), 244-260. https://doi.org/10.1002/(SICI)1096-9861(20000501)420:2<244::AID-CNE7>3.0.CO;2-M Sex: Males Age: Adult Method: fluorescent tracers rhodamine dextran amine; an…
AI	MSt	Zebra Finch	**Zebra Finch** *Taeniopygia guttata* Bottjer, S. W., Brady, J. D., & Cribbs, B. (2000). Connections of a motor cortical region in zebra finches: relation to pathways for vocal learning. The Journal of comparative neurology, 420(2), 244-260. https://doi.org/10.1002/(SICI)1096-9861(20000501)420:2<244::AID-CNE7>3.0.CO;2-M Sex: Males Age: Adult Method: fluorescent tracers rhodamine dextran amine; an…
AI	Bas	Zebra Finch	**Zebra Finch** *Taeniopygia guttata* Wild, J. M., & Farabaugh, S. M. (1996). Organization of afferent and efferent projections of the nucleus basalis prosencephali in a passerine, Taeniopygia guttata. The Journal of comparative neurology, 365(2), 306-328. https://doi.org/10.1002/(SICI)1096-9861(19960205)365:2<306::AID-CNE8>3.0.CO;2-9 Sex: Males Age: Adult Method: BDA
AI	Ov (Core)	Zebra Finch	**Zebra Finch** *Taeniopygia guttata* Mello, C. V., Vates, G. E., Okuhata, S., & Nottebohm, F. (1998). Descending auditory pathways in the adult male zebra finch *Taeniopygia guttata*. The Journal of comparative neurology, 395(2), 137-160. https://doi.org/10.1002/(SICI)1096-9861(19980601)395:2<137::AID-CNE1>3.0.CO;2-3 Sex: Males Age: Adult (>P120) Method: rhodamine beads
AI	RPcvm	Zebra Finch|Non-Zebra Finch	**Zebra Finch** *Taeniopygia guttata* Wild, J. M., & Farabaugh, S. M. (1996). Organization of afferent and efferent projections of the nucleus basalis prosencephali in a passerine, Taeniopygia guttata. The Journal of comparative neurology, 365(2), 306-328. https://doi.org/10.1002/(SICI)1096-9861(19960205)365:2<306::AID-CNE8>3.0.CO;2-9 Sex: Males Age: Adult Method: BDA --- **Zebra Finch** *Taeniop…
AI	SCE	Zebra Finch	**Zebra Finch** *Taeniopygia guttata* Bottjer, S. W., Brady, J. D., & Cribbs, B. (2000). Connections of a motor cortical region in zebra finches: relation to pathways for vocal learning. The Journal of comparative neurology, 420(2), 244-260. https://doi.org/10.1002/(SICI)1096-9861(20000501)420:2<244::AID-CNE7>3.0.CO;2-M Sex: Males Age: Adult Method: fluorescent tracers rhodamine dextran amine; an…
AI	AD	Zebra Finch	**Zebra Finch** *Taeniopygia guttata* Sadananda, M., Korte, S., & Bischof, H. J. (2007). Afferentation of a caudal forebrain area activated during courtship behavior: a tracing study in the zebra finch *Taeniopygia guttata). Brain research, 1184, 108-120. https://doi.org/10.1016/j.brainres.2007.09.040 Sex: Males Age: Adult Method: Rhodamine B-Isothiocyanate and Diamidino Yellow (Dihydrochloride);…
AI	NCL	Zebra Finch|Non-Zebra Finch	**Zebra Finch** *Taeniopygia guttata* Sadananda, M., Korte, S., & Bischof, H. J. (2007). Afferentation of a caudal forebrain area activated during courtship behavior: a tracing study in the zebra finch (Taeniopygia guttata). Brain research, 1184, 108-120. https://doi.org/10.1016/j.brainres.2007.09.040 Sex: Males Age: Adult Method: Rhodamine B-Isothiocyanate and Diamidino Yellow (Dihydrochloride);…
AI	MV	Zebra Finch|Non-Zebra Finch	**Zebra Finch** *Taeniopygia guttata* Wild, J. M., & Farabaugh, S. M. (1996). Organization of afferent and efferent projections of the nucleus basalis prosencephali in a passerine, Taeniopygia guttata. The Journal of comparative neurology, 365(2), 306-328. https://doi.org/10.1002/(SICI)1096-9861(19960205)365:2<306::AID-CNE8>3.0.CO;2-9 Sex: Males Age: Adult Method: BDA --- **Zebra Finch** *Taeniop…
AI	Slu	Zebra Finch	**Zebra Finch** *Taeniopygia guttata* Bottjer, S. W., Brady, J. D., & Cribbs, B. (2000). Connections of a motor cortical region in zebra finches: relation to pathways for vocal learning. The Journal of comparative neurology, 420(2), 244-260. https://doi.org/10.1002/(SICI)1096-9861(20000501)420:2<244::AID-CNE7>3.0.CO;2-M Sex: Males Age: Adult Method: fluorescent tracers rhodamine dextran amine; an…
AI	OT	Zebra Finch	**Zebra Finch** *Taeniopygia guttata* Bottjer, S. W., Brady, J. D., & Cribbs, B. (2000). Connections of a motor cortical region in zebra finches: relation to pathways for vocal learning. The Journal of comparative neurology, 420(2), 244-260. https://doi.org/10.1002/(SICI)1096-9861(20000501)420:2<244::AID-CNE7>3.0.CO;2-M Sex: Males Age: Adult Method: fluorescent tracers rhodamine dextran amine; an…
AI	DLP	Zebra Finch	**Zebra Finch** *Taeniopygia guttata* Bottjer, S. W., Brady, J. D., & Cribbs, B. (2000). Connections of a motor cortical region in zebra finches: relation to pathways for vocal learning. The Journal of comparative neurology, 420(2), 244-260. https://doi.org/10.1002/(SICI)1096-9861(20000501)420:2<244::AID-CNE7>3.0.CO;2-M Sex: Males Age: Adult Method: fluorescent tracers rhodamine dextran amine; an…
AI	DLM	Zebra Finch	**Zebra Finch** *Taeniopygia guttata* Bottjer, S. W., Brady, J. D., & Cribbs, B. (2000). Connections of a motor cortical region in zebra finches: relation to pathways for vocal learning. The Journal of comparative neurology, 420(2), 244-260. https://doi.org/10.1002/(SICI)1096-9861(20000501)420:2<244::AID-CNE7>3.0.CO;2-M Sex: Males Age: Adult Method: fluorescent tracers rhodamine dextran amine; an…
AI	LSt	Zebra Finch	**Zebra Finch** *Taeniopygia guttata* Bottjer, S. W., Brady, J. D., & Cribbs, B. (2000). Connections of a motor cortical region in zebra finches: relation to pathways for vocal learning. The Journal of comparative neurology, 420(2), 244-260. https://doi.org/10.1002/(SICI)1096-9861(20000501)420:2<244::AID-CNE7>3.0.CO;2-M Sex: Males Age: Adult Method: fluorescent tracers rhodamine dextran amine; an…
AI	MVIId	Zebra Finch	**Zebra Finch** *Taeniopygia guttata* Wild, J. M., & Farabaugh, S. M. (1996). Organization of afferent and efferent projections of the nucleus basalis prosencephali in a passerine, Taeniopygia guttata. The Journal of comparative neurology, 365(2), 306-328. https://doi.org/10.1002/(SICI)1096-9861(19960205)365:2<306::AID-CNE8>3.0.CO;2-9 Sex: Males Age: Adult Method: BDA
AI	FRM	Zebra Finch	**Zebra Finch** *Taeniopygia guttata* Bottjer, S. W., Brady, J. D., & Cribbs, B. (2000). Connections of a motor cortical region in zebra finches: relation to pathways for vocal learning. The Journal of comparative neurology, 420(2), 244-260. https://doi.org/10.1002/(SICI)1096-9861(20000501)420:2<244::AID-CNE7>3.0.CO;2-M Sex: Males Age: Adult Method: fluorescent tracers rhodamine dextran amine; an…
AI	nTTDo	Zebra Finch	**Zebra Finch** *Taeniopygia guttata* Wild, J. M., & Farabaugh, S. M. (1996). Organization of afferent and efferent projections of the nucleus basalis prosencephali in a passerine, Taeniopygia guttata. The Journal of comparative neurology, 365(2), 306-328. https://doi.org/10.1002/(SICI)1096-9861(19960205)365:2<306::AID-CNE8>3.0.CO;2-9 Sex: Males Age: Adult Method: BDA
AI	DIVA	Zebra Finch	**Zebra Finch** *Taeniopygia guttata* Wild, J. M., & Farabaugh, S. M. (1996). Organization of afferent and efferent projections of the nucleus basalis prosencephali in a passerine, Taeniopygia guttata. The Journal of comparative neurology, 365(2), 306-328. https://doi.org/10.1002/(SICI)1096-9861(19960205)365:2<306::AID-CNE8>3.0.CO;2-9 Sex: Males Age: Adult Method: BDA, CTB, evoked potentials
AI	AIV	Zebra Finch	**Zebra Finch** *Taeniopygia guttata* Paterson, A. K., & Bottjer, S. W. (2017). Cortical inter-hemispheric circuits for multimodal vocal learning in songbirds. The Journal of comparative neurology, 525(15), 3312-3340. https://doi.org/10.1002/cne.24280 Sex: Males Age: Adult (100-180 dph) Method: Fluorescently conjugated CTB and dextran amines
AI	SN	Zebra Finch	**Zebra Finch** *Taeniopygia guttata* Bottjer, S. W., Brady, J. D., & Cribbs, B. (2000). Connections of a motor cortical region in zebra finches: relation to pathways for vocal learning. The Journal of comparative neurology, 420(2), 244-260. https://doi.org/10.1002/(SICI)1096-9861(20000501)420:2<244::AID-CNE7>3.0.CO;2-M Sex: Males Age: Adult Method: fluorescent tracers rhodamine dextran amine; an…
AI	NIL	Zebra Finch	**Zebra Finch** *Taeniopygia guttata* Sadananda, M., & Bischof, H. J. (2006). Afferentation of the lateral nidopallium: A tracing study of a brain area involved in sexual imprinting in the zebra finch *Taeniopygia guttata). Brain research, 1106(1), 111-122. https://doi.org/10.1016/j.brainres.2006.04.009 Sex: Undetermined Age: Adult Method: RITC; BDA
AI	CSt	Zebra Finch	**Zebra Finch** *Taeniopygia guttata* Wild, J. M., & Farabaugh, S. M. (1996). Organization of afferent and efferent projections of the nucleus basalis prosencephali in a passerine, Taeniopygia guttata. The Journal of comparative neurology, 365(2), 306-328. https://doi.org/10.1002/(SICI)1096-9861(19960205)365:2<306::AID-CNE8>3.0.CO;2-9 Sex: Males Age: Adult Method: BDA
AI	VTA	Zebra Finch	**Zebra Finch** *Taeniopygia guttata* Bottjer, S. W., Brady, J. D., & Cribbs, B. (2000). Connections of a motor cortical region in zebra finches: relation to pathways for vocal learning. The Journal of comparative neurology, 420(2), 244-260. https://doi.org/10.1002/(SICI)1096-9861(20000501)420:2<244::AID-CNE7>3.0.CO;2-M Sex: Males Age: Adult Method: fluorescent tracers rhodamine dextran amine; an…
AI	RPgc	Zebra Finch	**Zebra Finch** *Taeniopygia guttata* Bottjer, S. W., Brady, J. D., & Cribbs, B. (2000). Connections of a motor cortical region in zebra finches: relation to pathways for vocal learning. The Journal of comparative neurology, 420(2), 244-260. https://doi.org/10.1002/(SICI)1096-9861(20000501)420:2<244::AID-CNE7>3.0.CO;2-M Sex: Males Age: Adult Method: fluorescent tracers rhodamine dextran amine; an…
AI	ILM	Zebra Finch	**Zebra Finch** *Taeniopygia guttata* Bottjer, S. W., Brady, J. D., & Cribbs, B. (2000). Connections of a motor cortical region in zebra finches: relation to pathways for vocal learning. The Journal of comparative neurology, 420(2), 244-260. https://doi.org/10.1002/(SICI)1096-9861(20000501)420:2<244::AID-CNE7>3.0.CO;2-M Sex: Males Age: Adult Method: fluorescent tracers rhodamine dextran amine; an…
AI	PL	Zebra Finch	**Zebra Finch** *Taeniopygia guttata* Wild, J. M., & Gaede, A. H. (2016). Second tectofugal pathway in a songbird *Taeniopygia guttata) revisited: Tectal and lateral pontine projections to the posterior thalamus, thence to the intermediate nidopallium. The Journal of comparative neurology, 524(5), 963-985. https://doi.org/10.1002/cne.23886 Sex: Undetermined Age: Adult (>P100) Method: BDA
AI	CuE	Zebra Finch|Non-Zebra Finch	**Zebra Finch** *Taeniopygia guttata* Wild, J. M., & Krützfeldt, N. E. (2012). Trigeminal and telencephalic projections to jaw and other upper vocal tract premotor neurons in songbirds: sensorimotor circuitry for beak movements during singing. The Journal of comparative neurology, 520(3), 590-605. https://doi.org/10.1002/cne.22752 Sex: Males Age: Adult Method: CTB, BDA (10kDa) --- **Canary** *Ser…
AI	FRL	Zebra Finch	**Zebra Finch** *Taeniopygia guttata* Wild, J. M., & Farabaugh, S. M. (1996). Organization of afferent and efferent projections of the nucleus basalis prosencephali in a passerine, Taeniopygia guttata. The Journal of comparative neurology, 365(2), 306-328. https://doi.org/10.1002/(SICI)1096-9861(19960205)365:2<306::AID-CNE8>3.0.CO;2-9 Sex: Males Age: Adult Method: BDA, CTB, evoked potentials Late…
AI	DMP	Zebra Finch	**Zebra Finch** *Taeniopygia guttata* Bottjer, S. W., Brady, J. D., & Cribbs, B. (2000). Connections of a motor cortical region in zebra finches: relation to pathways for vocal learning. The Journal of comparative neurology, 420(2), 244-260. https://doi.org/10.1002/(SICI)1096-9861(20000501)420:2<244::AID-CNE7>3.0.CO;2-M Sex: Males Age: Adult Method: fluorescent tracers rhodamine dextran amine; an…
Air Sacs	nTS	Zebra Finch	**Zebra Finch** *Taeniopygia guttata* Kubke, M. F., Ross, J. M., & Wild, J. M. (2004). Vagal innervation of the air sacs in a songbird, Taenopygia guttata. Journal of anatomy, 204(4), 283-292. https://doi.org/10.1111/j.0021-8782.2004.00286.x Sex: Not Reported Age: Not Reported Method: CTB
AIV	Area X	Zebra Finch	**Zebra Finch** *Taeniopygia guttata* Castelino, C. B., Diekamp, B., & Ball, G. F. (2007). Noradrenergic projections to the song control nucleus area X of the medial striatum in male zebra finches (Taeniopygia guttata). The Journal of comparative neurology, 502(4), 544-562. https://doi.org/10.1002/cne.21337 Sex: Males Age: Adult Method: retrograde tracer CTB, anterograde tracer BDA
AIV	STN	Zebra Finch	**Zebra Finch** *Taeniopygia guttata* Das, A., & Goldberg, J. H. (2022). Songbird subthalamic neurons project to dopaminergic midbrain and exhibit singing-related activity. Journal of neurophysiology, 127(2), 373-383. https://doi.org/10.1152/jn.00254.2021 Sex: Males Age: Adult (>P90) Method: AAV9; CTB
AIV	MSt	Zebra Finch	**Zebra Finch** *Taeniopygia guttata* Bottjer, S. W., Brady, J. D., & Cribbs, B. (2000). Connections of a motor cortical region in zebra finches: relation to pathways for vocal learning. The Journal of comparative neurology, 420(2), 244-260. https://doi.org/10.1002/(SICI)1096-9861(20000501)420:2<244::AID-CNE7>3.0.CO;2-M Sex: Males Age: Adult Method: fluorescent tracers rhodamine dextran amine; an…
AIV	RPcdl	Zebra Finch	**Zebra Finch** *Taeniopygia guttata* Bottjer, S. W., Brady, J. D., & Cribbs, B. (2000). Connections of a motor cortical region in zebra finches: relation to pathways for vocal learning. The Journal of comparative neurology, 420(2), 244-260. https://doi.org/10.1002/(SICI)1096-9861(20000501)420:2<244::AID-CNE7>3.0.CO;2-M Sex: Males Age: Adult Method: fluorescent tracers rhodamine dextran amine; an…
AIV	LHb	Zebra Finch	**Zebra Finch** *Taeniopygia guttata* Roeser, A., Teoh, H. K., Chen, R., Cohen, I., & Goldberg, J. (2023). The songbird lateral habenula projects to dopaminergic midbrain and is important for normal vocal development. eLife, 12, RP90392. https://doi.org/10.7554/eLife.90392.1 Sex: Males Age: Adult Method: Dextran 488
AIV	LSt	Zebra Finch	**Zebra Finch** *Taeniopygia guttata* Bottjer, S. W., Brady, J. D., & Cribbs, B. (2000). Connections of a motor cortical region in zebra finches: relation to pathways for vocal learning. The Journal of comparative neurology, 420(2), 244-260. https://doi.org/10.1002/(SICI)1096-9861(20000501)420:2<244::AID-CNE7>3.0.CO;2-M Sex: Males Age: Adult Method: fluorescent tracers rhodamine dextran amine; an…
AIV	CG	Zebra Finch	**Zebra Finch** *Taeniopygia guttata* Ben-Tov, M., Duarte, F., & Mooney, R. (2023). A neural hub for holistic courtship displays. Current biology : CB, 33(9), 1640-1653.e5. https://doi.org/10.1016/j.cub.2023.02.072 Sex: Males Age: Adult Method: Retrobeads
AIV	OT	Zebra Finch	**Zebra Finch** *Taeniopygia guttata* Bottjer, S. W., Brady, J. D., & Cribbs, B. (2000). Connections of a motor cortical region in zebra finches: relation to pathways for vocal learning. The Journal of comparative neurology, 420(2), 244-260. https://doi.org/10.1002/(SICI)1096-9861(20000501)420:2<244::AID-CNE7>3.0.CO;2-M Sex: Males Age: Adult Method: fluorescent tracers rhodamine dextran amine; an…
AIV	SN	Zebra Finch	**Zebra Finch** *Taeniopygia guttata* Mandelblat-Cerf, Y., Las, L., Denisenko, N., & Fee, M. S. (2014). A role for descending auditory cortical projections in songbird vocal learning. eLife, 3, e02152. https://doi.org/10.7554/eLife.02152 Sex: Males Age: Adult Method: retrograde tracer CTB; anterograde tracer GFP --- **Zebra Finch** *Taeniopygia guttata* Gale, S. D., Person, A. L., & Perkel, D. J.…
AIV	BSTL	Zebra Finch	**Zebra Finch** *Taeniopygia guttata* Bottjer, S. W., Brady, J. D., & Cribbs, B. (2000). Connections of a motor cortical region in zebra finches: relation to pathways for vocal learning. The Journal of comparative neurology, 420(2), 244-260. https://doi.org/10.1002/(SICI)1096-9861(20000501)420:2<244::AID-CNE7>3.0.CO;2-M Sex: Males Age: Adult Method: fluorescent tracers rhodamine dextran amine; an…
AIV	HA (Rostral)	Zebra Finch	**Zebra Finch** *Taeniopygia guttata* Wild, J. M., & Williams, M. N. (1999). Rostral wulst of passerine birds: II. Intratelencephalic projections to nuclei associated with the auditory and song systems. The Journal of comparative neurology, 413(4), 520-534. https://doi.org/10.1002/(sici)1096-9861(19991101)413:4<520::aid-cne3>3.0.co;2-b Sex: Undetermined Age: Not Reported Method: BDA, CTB
AIV	CSt	Zebra Finch	**Zebra Finch** *Taeniopygia guttata* Bottjer, S. W., Brady, J. D., & Cribbs, B. (2000). Connections of a motor cortical region in zebra finches: relation to pathways for vocal learning. The Journal of comparative neurology, 420(2), 244-260. https://doi.org/10.1002/(SICI)1096-9861(20000501)420:2<244::AID-CNE7>3.0.CO;2-M Sex: Males Age: Adult Method: fluorescent tracers rhodamine dextran amine; an…
AIV	VP	Zebra Finch	**Zebra Finch** *Taeniopygia guttata* Chen, R., Puzerey, P. A., Roeser, A. C., Riccelli, T. E., Podury, A., Maher, K., Farhang, A. R., & Goldberg, J. H. (2019). Songbird Ventral Pallidum Sends Diverse Performance Error Signals to Dopaminergic Midbrain. Neuron, 103(2), 266-276.e4. https://doi.org/10.1016/j.neuron.2019.04.038 Sex: Males Age: Adult Method: scAAV9 GFP --- **Zebra Finch** *Taeniopygia…
AIV	AD	Zebra Finch	**Zebra Finch** *Taeniopygia guttata* Sadananda, M., Korte, S., & Bischof, H. J. (2007). Afferentation of a caudal forebrain area activated during courtship behavior: a tracing study in the zebra finch *Taeniopygia guttata). Brain research, 1184, 108-120. https://doi.org/10.1016/j.brainres.2007.09.040 Sex: Males Age: Adult Method: Rhodamine B-Isothiocyanate and Diamidino Yellow (Dihydrochloride);…
AIV	VTA	Zebra Finch	**Zebra Finch** *Taeniopygia guttata* Chen, R., Puzerey, P. A., Roeser, A. C., Riccelli, T. E., Podury, A., Maher, K., Farhang, A. R., & Goldberg, J. H. (2019). Songbird Ventral Pallidum Sends Diverse Performance Error Signals to Dopaminergic Midbrain. Neuron, 103(2), 266-276.e4. https://doi.org/10.1016/j.neuron.2019.04.038 Sex: Males Age: Adult Method: CTB 555 --- **Zebra Finch** *Taeniopygia gu…
AIV	MLd	Zebra Finch	**Zebra Finch** *Taeniopygia guttata* Mello, C. V., Vates, G. E., Okuhata, S., & Nottebohm, F. (1998). Descending auditory pathways in the adult male zebra finch *Taeniopygia guttata*. The Journal of comparative neurology, 395(2), 137-160. https://doi.org/10.1002/(SICI)1096-9861(19980601)395:2<137::AID-CNE1>3.0.CO;2-3 Sex: Males Age: Adult (>P120) Method: rhodamine beads
AIV	LMAN	Zebra Finch	**Zebra Finch** *Taeniopygia guttata* Paterson, A. K., & Bottjer, S. W. (2017). Cortical inter-hemispheric circuits for multimodal vocal learning in songbirds. The Journal of comparative neurology, 525(15), 3312-3340. https://doi.org/10.1002/cne.24280 Sex: Males Age: Adult (100-180 dph) Method: Fluorescently conjugated CTB and dextrine amines
AIV	RA	Zebra Finch	**Zebra Finch** *Taeniopygia guttata* Sadananda, M., Korte, S., & Bischof, H. J. (2007). Afferentation of a caudal forebrain area activated during courtship behavior: a tracing study in the zebra finch (Taeniopygia guttata). Brain research, 1184, 108-120. https://doi.org/10.1016/j.brainres.2007.09.040 Sex: Males Age: Adult Method: Rhodamine B-Isothiocyanate and Diamidino Yellow (Dihydrochloride);…
AIV	DMP	Zebra Finch	**Zebra Finch** *Taeniopygia guttata* Foster, E. F., Mehta, R. P., & Bottjer, S. W. (1997). Axonal connections of the medial magnocellular nucleus of the anterior neostriatum in zebra finches. The Journal of comparative neurology, 382(3), 364-381. https://doi.org/10.1002/cne.903820305 Sex: Males Age: Adult Method: DiI
AIV	NIL	Zebra Finch	**Zebra Finch** *Taeniopygia guttata* Sadananda, M., & Bischof, H. J. (2006). Afferentation of the lateral nidopallium: A tracing study of a brain area involved in sexual imprinting in the zebra finch *Taeniopygia guttata). Brain research, 1106(1), 111-122. https://doi.org/10.1016/j.brainres.2006.04.009 Sex: Undetermined Age: Adult Method: BDA; RITC
AIV	NAc	Zebra Finch	**Zebra Finch** *Taeniopygia guttata* Bottjer, S. W., Brady, J. D., & Cribbs, B. (2000). Connections of a motor cortical region in zebra finches: relation to pathways for vocal learning. The Journal of comparative neurology, 420(2), 244-260. https://doi.org/10.1002/(SICI)1096-9861(20000501)420:2<244::AID-CNE7>3.0.CO;2-M Sex: Males Age: Adult Method: fluorescent tracers rhodamine dextran amine; an…
AIV	ILM	Zebra Finch	**Zebra Finch** *Taeniopygia guttata* Bottjer, S. W., Brady, J. D., & Cribbs, B. (2000). Connections of a motor cortical region in zebra finches: relation to pathways for vocal learning. The Journal of comparative neurology, 420(2), 244-260. https://doi.org/10.1002/(SICI)1096-9861(20000501)420:2<244::AID-CNE7>3.0.CO;2-M Sex: Males Age: Adult Method: fluorescent tracers rhodamine dextran amine; an…
AIV	SCE	Zebra Finch	**Zebra Finch** *Taeniopygia guttata* Bottjer, S. W., Brady, J. D., & Cribbs, B. (2000). Connections of a motor cortical region in zebra finches: relation to pathways for vocal learning. The Journal of comparative neurology, 420(2), 244-260. https://doi.org/10.1002/(SICI)1096-9861(20000501)420:2<244::AID-CNE7>3.0.CO;2-M Sex: Males Age: Adult Method: fluorescent tracers rhodamine dextran amine; an…
AIV	SpM	Zebra Finch	**Zebra Finch** *Taeniopygia guttata* Bottjer, S. W., Brady, J. D., & Cribbs, B. (2000). Connections of a motor cortical region in zebra finches: relation to pathways for vocal learning. The Journal of comparative neurology, 420(2), 244-260. https://doi.org/10.1002/(SICI)1096-9861(20000501)420:2<244::AID-CNE7>3.0.CO;2-M Sex: Males Age: Adult Method: fluorescent tracers rhodamine dextran amine; an…
AIV	VMH	Zebra Finch	**Zebra Finch** *Taeniopygia guttata* Wild J. M. (2017). The ventromedial hypothalamic nucleus in the zebra finch *Taeniopygia guttata): Afferent and efferent projections in relation to the control of reproductive behavior. The Journal of comparative neurology, 525(12), 2657-2676. https://doi.org/10.1002/cne.24225 Sex: Males and Females Age: Adult Method: CTB
AIV	AI	Zebra Finch	**Zebra Finch** *Taeniopygia guttata* Sadananda, M., Korte, S., & Bischof, H. J. (2007). Afferentation of a caudal forebrain area activated during courtship behavior: a tracing study in the zebra finch *Taeniopygia guttata). Brain research, 1184, 108-120. https://doi.org/10.1016/j.brainres.2007.09.040 Sex: Males Age: Adult Method: Rhodamine B-Isothiocyanate and Diamidino Yellow (Dihydrochloride);…
AIV	Ov (Core)	Zebra Finch	**Zebra Finch** *Taeniopygia guttata* Mello, C. V., Vates, G. E., Okuhata, S., & Nottebohm, F. (1998). Descending auditory pathways in the adult male zebra finch *Taeniopygia guttata*. The Journal of comparative neurology, 395(2), 137-160. https://doi.org/10.1002/(SICI)1096-9861(19980601)395:2<137::AID-CNE1>3.0.CO;2-3 Sex: Males Age: Adult (>P120) Method: rhodamine beads
AIV	NCL	Zebra Finch|Non-Zebra Finch	**Zebra Finch** *Taeniopygia guttata* Paterson, A. K., & Bottjer, S. W. (2017). Cortical inter-hemispheric circuits for multimodal vocal learning in songbirds. The Journal of comparative neurology, 525(15), 3312-3340. https://doi.org/10.1002/cne.24280 Sex: Males Age: Adult (100-180 dph) Method: Fluorescently conjugated CTB and dextrine amines --- **Zebra Finch** *Taeniopygia guttata* Sadananda, M…
AM	MS	Zebra Finch	**Zebra Finch** *Taeniopygia guttata* Wild J. M. (2017). The ventromedial hypothalamic nucleus in the zebra finch *Taeniopygia guttata): Afferent and efferent projections in relation to the control of reproductive behavior. The Journal of comparative neurology, 525(12), 2657-2676. https://doi.org/10.1002/cne.24225 Sex: Males and Females Age: Adult Method: BDA; CTB
AM	Ov (Shell)	Non-Zebra Finch	**Bengalese Finch** *Lonchura striata domestica* Zeng, S., Zhang, X., Peng, W., & Zuo, M. (2004). Immunohistochemistry and neural connectivity of the Ov shell in the songbird and their evolutionary implications. The Journal of comparative neurology, 470(2), 192-209. https://doi.org/10.1002/cne.11042 Sex: Undetermined Age: Adult Method: BDA (3kDa)
AM	Ov (Core)	Zebra Finch	**Zebra Finch** *Taeniopygia guttata* Vates, G. E., Broome, B. M., Mello, C. V., & Nottebohm, F. (1996). Auditory pathways of caudal telencephalon and their relation to the song system of adult male zebra finches. The Journal of comparative neurology, 366(4), 613-642. https://doi.org/10.1002/(SICI)1096-9861(19960318)366:4<613::AID-CNE5>3.0.CO;2-7 Sex: Males Age: Adult (>P120) Method: BDA (3kDa) o…
AM	BSTL	Zebra Finch	**Zebra Finch** *Taeniopygia guttata* Wild J. M. (2017). The ventromedial hypothalamic nucleus in the zebra finch *Taeniopygia guttata): Afferent and efferent projections in relation to the control of reproductive behavior. The Journal of comparative neurology, 525(12), 2657-2676. https://doi.org/10.1002/cne.24225 Sex: Males and Females Age: Adult Method: BDA; CTB
AM	LS	Zebra Finch	**Zebra Finch** *Taeniopygia guttata* Wild J. M. (2017). The ventromedial hypothalamic nucleus in the zebra finch *Taeniopygia guttata): Afferent and efferent projections in relation to the control of reproductive behavior. The Journal of comparative neurology, 525(12), 2657-2676. https://doi.org/10.1002/cne.24225 Sex: Males and Females Age: Adult Method: BDA; CTB
AM	VMH	Zebra Finch	**Zebra Finch** *Taeniopygia guttata* Wild J. M. (2017). The ventromedial hypothalamic nucleus in the zebra finch *Taeniopygia guttata): Afferent and efferent projections in relation to the control of reproductive behavior. The Journal of comparative neurology, 525(12), 2657-2676. https://doi.org/10.1002/cne.24225 Sex: Males and Females Age: Adult Method: BDA; CTB
Area X	VP	Zebra Finch	**Zebra Finch** *Taeniopygia guttata* Chen, R., Puzerey, P. A., Roeser, A. C., Riccelli, T. E., Podury, A., Maher, K., Farhang, A. R., & Goldberg, J. H. (2019). Songbird Ventral Pallidum Sends Diverse Performance Error Signals to Dopaminergic Midbrain. Neuron, 103(2), 266-276.e4. https://doi.org/10.1016/j.neuron.2019.04.038 Sex: Males Age: Adult Method: scAAV9 GFP --- **Zebra Finch** *Taeniopygia…
Area X	DLM	Zebra Finch|Non-Zebra Finch	**Zebra Finch** *Taeniopygia guttata* Bottjer, S. W., Halsema, K. A., Brown, S. A., & Miesner, E. A. (1989). Axonal connections of a forebrain nucleus involved with vocal learning in zebra finches. The Journal of comparative neurology, 279(2), 312-326. https://doi.org/10.1002/cne.902790211 Sex: Males Age: Adult (>P90) Method: HRP-soaked pledget; WGA-HRP --- **Zebra Finch** *Taeniopygia guttata* G…
Av	NIf	Zebra Finch	**Zebra Finch** *Taeniopygia guttata* Akutagawa, E., & Konishi, M. (2010). New brain pathways found in the vocal control system of a songbird. The Journal of comparative neurology, 518(15), 3086-3100. https://doi.org/10.1002/cne.22383 Sex: Males Age: Adult Method: BDA
Av	HVC	Zebra Finch	**Zebra Finch** *Taeniopygia guttata* Akutagawa, E., & Konishi, M. (2010). New brain pathways found in the vocal control system of a songbird. The Journal of comparative neurology, 518(15), 3086-3100. https://doi.org/10.1002/cne.22383 Sex: Males Age: Adult Method: dextran rhodamine; BDA --- **Zebra Finch** *Taeniopygia guttata* Shaughnessy, D. W., Hyson, R. L., Bertram, R., Wu, W., & Johnson, F. …
Bas	ILM	Zebra Finch	**Zebra Finch** *Taeniopygia guttata* Wild, J. M., & Farabaugh, S. M. (1996). Organization of afferent and efferent projections of the nucleus basalis prosencephali in a passerine, Taeniopygia guttata. The Journal of comparative neurology, 365(2), 306-328. https://doi.org/10.1002/(SICI)1096-9861(19960205)365:2<306::AID-CNE8>3.0.CO;2-9 Sex: Males Age: Adult Method: BDA
Bas	NFL	Zebra Finch	**Zebra Finch** *Taeniopygia guttata* Wild, J. M., & Farabaugh, S. M. (1996). Organization of afferent and efferent projections of the nucleus basalis prosencephali in a passerine, Taeniopygia guttata. The Journal of comparative neurology, 365(2), 306-328. https://doi.org/10.1002/(SICI)1096-9861(19960205)365:2<306::AID-CNE8>3.0.CO;2-9 Sex: Males Age: Adult Method: BDA, CTB, evoked potentials
Bas	NCL	Zebra Finch	**Zebra Finch** *Taeniopygia guttata* Wild, J. M., & Farabaugh, S. M. (1996). Organization of afferent and efferent projections of the nucleus basalis prosencephali in a passerine, Taeniopygia guttata. The Journal of comparative neurology, 365(2), 306-328. https://doi.org/10.1002/(SICI)1096-9861(19960205)365:2<306::AID-CNE8>3.0.CO;2-9 Sex: Males Age: Adult Method: BDA
Bas	AI	Zebra Finch|Non-Zebra Finch	**Zebra Finch** *Taeniopygia guttata* Wild, J. M., & Farabaugh, S. M. (1996). Organization of afferent and efferent projections of the nucleus basalis prosencephali in a passerine, Taeniopygia guttata. The Journal of comparative neurology, 365(2), 306-328. https://doi.org/10.1002/(SICI)1096-9861(19960205)365:2<306::AID-CNE8>3.0.CO;2-9 Sex: Males Age: Adult Method: BDA --- **Zebra Finch** *Taeniop…
BSTL	TnA	Non-Zebra Finch	**European Starling** *Sturnus vulgaris* Cheng, M., Chaiken, M., Zuo, M., & Miller, H. (1999). Nucleus taenia of the amygdala of birds: anatomical and functional studies in ring doves (Streptopelia risoria) and European Starlings (Sturnus vulgaris). Brain, behavior and evolution, 53(5-6), 243-270. https://doi.org/10.1159/000006597 Sex: Males Age: Adult (>P450) Method: FluoroGold
BSTL	POM	Non-Zebra Finch	**European Starling** *Sturnus vulgaris* Riters, L. V., & Alger, S. J. (2004). Neuroanatomical evidence for indirect connections between the medial preoptic nucleus and the song control system: possible neural substrates for sexually motivated song. Cell and tissue research, 316(1), 35-44. https://doi.org/10.1007/s00441-003-0838-6 Sex: Males Age: Adult Method: BDA
BSTM	VMH	Non-Zebra Finch	**European Starling** *Sturnus vulgaris* Cheng, M., Chaiken, M., Zuo, M., & Miller, H. (1999). Nucleus taenia of the amygdala of birds: anatomical and functional studies in ring doves (Streptopelia risoria) and European Starlings (Sturnus vulgaris). Brain, behavior and evolution, 53(5-6), 243-270. https://doi.org/10.1159/000006597 Sex: Males Age: Adult (>P450) Method: FluoroGold
BSTM	LHy	Non-Zebra Finch	**European Starling** *Sturnus vulgaris* Cheng, M., Chaiken, M., Zuo, M., & Miller, H. (1999). Nucleus taenia of the amygdala of birds: anatomical and functional studies in ring doves (Streptopelia risoria) and European Starlings (Sturnus vulgaris). Brain, behavior and evolution, 53(5-6), 243-270. https://doi.org/10.1159/000006597 Sex: Males Age: Adult (>P450) Method: FluoroGold
CDL	DMHp	Non-Zebra Finch	**Black-capped Chickadee** *Poecile atricapillus* Applegate, M. C., Gutnichenko, K. S., Mackevicius, E. L., Aronov, D. (2023). An entorhinal-like region in food-caching birds. Current Biology, 33(12), 2465-2477.e7. https://doi.org/10.1016/j.cub.2023.05.031 Sex: Undetermined Age: Adult (>P120) Method: CTB; scAAV -- **Garden Warbler** *Sylvia borin* Heyers, D., Musielak, I., Haase, K., Herold, C., …
CDL	NFL	Zebra Finch	**Zebra Finch** *Taeniopygia guttata* Sadananda, M., & Bischof, H. J. (2006). Afferentation of the lateral nidopallium: A tracing study of a brain area involved in sexual imprinting in the zebra finch *Taeniopygia guttata). Brain research, 1106(1), 111-122. https://doi.org/10.1016/j.brainres.2006.04.009 Sex: Undetermined Age: Adult Method: BDA
CDL	HA (Caudal)	Non-Zebra Finch	**Garden Warbler** *Sylvia borin* Heyers, D., Musielak, I., Haase, K., Herold, C., Bolte, P., Güntürkün, O., & Mouritsen, H. (2022). Morphology, biochemistry and connectivity of Cluster N and the hippocampal formation in a migratory bird. Brain structure & function, 227(8), 2731–2749. https://doi.org/10.1007/s00429-022-02566-y Sex: Not Reported Age: Not Reported Method: CTB
CG	Area X	Zebra Finch	**Zebra Finch** *Taeniopygia guttata* Castelino, C. B., Diekamp, B., & Ball, G. F. (2007). Noradrenergic projections to the song control nucleus area X of the medial striatum in male zebra finches (Taeniopygia guttata). The Journal of comparative neurology, 502(4), 544-562. https://doi.org/10.1002/cne.21337 Sex: Males Age: Adult Method: retrograde tracer CTB, anterograde tracer BDA --- **Zebra Fi…
CG	RPgc	Zebra Finch	**Zebra Finch** *Taeniopygia guttata* Ben-Tov, M., Duarte, F., & Mooney, R. (2023). A neural hub for holistic courtship displays. Current biology : CB, 33(9), 1640-1653.e5. https://doi.org/10.1016/j.cub.2023.02.072 Sex: Males Age: Adult Method: AAV2/9.CAG-scGFP; Dextran-489
CG	RA	Non-Zebra Finch	**Canary** *Serinus canaria* Appeltants, D., Ball, G. F., & Balthazart, J. (2002). The origin of catecholaminergic inputs to the song control nucleus RA in canaries. Neuroreport, 13(5), 649-653. https://doi.org/10.1097/00001756-200204160-00023 Sex: Males and Females Age: Adult Method: red latex fluospheres
CG	POM	Non-Zebra Finch	**European Starling** *Sturnus vulgaris* Riters, L. V., & Alger, S. J. (2004). Neuroanatomical evidence for indirect connections between the medial preoptic nucleus and the song control system: possible neural substrates for sexually motivated song. Cell and tissue research, 316(1), 35-44. https://doi.org/10.1007/s00441-003-0838-6 Sex: Males Age: Adult Method: BDA
CG	ICo	Zebra Finch	**Zebra Finch** *Taeniopygia guttata* Ben-Tov, M., Duarte, F., & Mooney, R. (2023). A neural hub for holistic courtship displays. Current biology : CB, 33(9), 1640-1653.e5. https://doi.org/10.1016/j.cub.2023.02.072 Sex: Males Age: Adult Method: AAV2/9.CAG-scGFP; Dextran-490
CG	HVC	Zebra Finch|Non-Zebra Finch	**Canary** *Serinus canaria* Appeltants, D., Absil, P., Balthazart, J., & Ball, G. F. (2000). Identification of the origin of catecholaminergic inputs to HVc in canaries by retrograde tract tracing combined with tyrosine hydroxylase immunocytochemistry. Journal of chemical neuroanatomy, 18(3), 117-133. https://doi.org/10.1016/s0891-0618(99)00054-x Sex: Males and Females Age: Adult Method: retrogr…
CLM	NFL	Zebra Finch	**Zebra Finch** *Taeniopygia guttata* Sadananda, M., & Bischof, H. J. (2006). Afferentation of the lateral nidopallium: A tracing study of a brain area involved in sexual imprinting in the zebra finch *Taeniopygia guttata). Brain research, 1106(1), 111-122. https://doi.org/10.1016/j.brainres.2006.04.009 Sex: Undetermined Age: Adult Method: RITC
CLM	CMM	Zebra Finch	**Zebra Finch** *Taeniopygia guttata* Vates, G. E., Broome, B. M., Mello, C. V., & Nottebohm, F. (1996). Auditory pathways of caudal telencephalon and their relation to the song system of adult male zebra finches. The Journal of comparative neurology, 366(4), 613-642. https://doi.org/10.1002/(SICI)1096-9861(19960318)366:4<613::AID-CNE5>3.0.CO;2-7 Sex: Males Age: Adult (>P120) Method: BDA (3kDa) o…
CLM	NIf	Zebra Finch	**Zebra Finch** *Taeniopygia guttata* Bauer, E. E., Coleman, M. J., Roberts, T. F., Roy, A., Prather, J. F., & Mooney, R. (2008). A synaptic basis for auditory-vocal integration in the songbird. The Journal of neuroscience : the official journal of the Society for Neuroscience, 28(6), 1509-1522. https://doi.org/10.1523/JNEUROSCI.3838-07.2008 Sex: Males Age: Adult (>P90) Method: lentivirus (GFP or…
CLM	L2b	Zebra Finch	**Zebra Finch** *Taeniopygia guttata* Vates, G. E., Broome, B. M., Mello, C. V., & Nottebohm, F. (1996). Auditory pathways of caudal telencephalon and their relation to the song system of adult male zebra finches. The Journal of comparative neurology, 366(4), 613-642. https://doi.org/10.1002/(SICI)1096-9861(19960318)366:4<613::AID-CNE5>3.0.CO;2-7 Sex: Males Age: Adult (>P120) Method: BDA (3kDa) o…
CLM	HVC	Zebra Finch	**Zebra Finch** *Taeniopygia guttata* Bauer, E. E., Coleman, M. J., Roberts, T. F., Roy, A., Prather, J. F., & Mooney, R. (2008). A synaptic basis for auditory-vocal integration in the songbird. The Journal of neuroscience : the official journal of the Society for Neuroscience, 28(6), 1509-1522. https://doi.org/10.1523/JNEUROSCI.3838-07.2008 Sex: Males Age: Adult (>P90) Method: lentivirus (GFP or…
CLM	NCL	Zebra Finch|Non-Zebra Finch	**Bengalese Finch** *Lonchura striata domestica* Dunning, J. L., Maze, S. E., Atwood, E. J., & Prather, J. F. (2018). Caudal mesopallial neurons in female songbirds bridge sensory and motor brain regions. The Journal of comparative neurology, 526(10), 1703-1711. https://doi.org/10.1002/cne.24440 Sex: Females Age: Adult (>P120) Method: BDA (10kDa) --- **Zebra Finch** *Taeniopygia guttata* Fortune,…
CLM	AI	Zebra Finch	**Zebra Finch** *Taeniopygia guttata* Sadananda, M., Korte, S., & Bischof, H. J. (2007). Afferentation of a caudal forebrain area activated during courtship behavior: a tracing study in the zebra finch *Taeniopygia guttata). Brain research, 1184, 108-120. https://doi.org/10.1016/j.brainres.2007.09.040 Sex: Males Age: Adult Method: Rhodamine B-Isothiocyanate and Diamidino Yellow (Dihydrochloride);…
CLM	RA	Non-Zebra Finch	**Bengalese Finch** *Lonchura striata domestica* Dunning, J. L., Maze, S. E., Atwood, E. J., & Prather, J. F. (2018). Caudal mesopallial neurons in female songbirds bridge sensory and motor brain regions. The Journal of comparative neurology, 526(10), 1703-1711. https://doi.org/10.1002/cne.24440 Sex: Females Age: Adult (>P120) Method: BDA (10kDa)
CLM	L1	Zebra Finch	**Zebra Finch** *Taeniopygia guttata* Vates, G. E., Broome, B. M., Mello, C. V., & Nottebohm, F. (1996). Auditory pathways of caudal telencephalon and their relation to the song system of adult male zebra finches. The Journal of comparative neurology, 366(4), 613-642. https://doi.org/10.1002/(SICI)1096-9861(19960318)366:4<613::AID-CNE5>3.0.CO;2-7 Sex: Males Age: Adult (>P120) Method: BDA (3kDa) o…
CLM	L2a	Zebra Finch	**Zebra Finch** *Taeniopygia guttata* Bauer, E. E., Coleman, M. J., Roberts, T. F., Roy, A., Prather, J. F., & Mooney, R. (2008). A synaptic basis for auditory-vocal integration in the songbird. The Journal of neuroscience : the official journal of the Society for Neuroscience, 28(6), 1509-1522. https://doi.org/10.1523/JNEUROSCI.3838-07.2008 Sex: Males Age: Adult (>P90) Method: lentivirus (GFP or…
CLM	RA Cup	Zebra Finch	**Zebra Finch** *Taeniopygia guttata* Mello, C. V., Vates, G. E., Okuhata, S., & Nottebohm, F. (1998). Descending auditory pathways in the adult male zebra finch *Taeniopygia guttata*. The Journal of comparative neurology, 395(2), 137-160. https://doi.org/10.1002/(SICI)1096-9861(19980601)395:2<137::AID-CNE1>3.0.CO;2-3 Sex: Males Age: Adult (>P120) Method: rhodamine beads --- **Zebra Finch** *Taen…
CLM	AIV	Zebra Finch|Non-Zebra Finch	**Bengalese Finch** *Lonchura striata domestica* Dunning, J. L., Maze, S. E., Atwood, E. J., & Prather, J. F. (2018). Caudal mesopallial neurons in female songbirds bridge sensory and motor brain regions. The Journal of comparative neurology, 526(10), 1703-1711. https://doi.org/10.1002/cne.24440 Sex: Females Age: Adult (>P120) Method: BDA (10kDa) --- **Zebra Finch** *Taeniopygia guttata* Mandelbl…
CLM	NIL	Zebra Finch	**Zebra Finch** *Taeniopygia guttata* Sadananda, M., & Bischof, H. J. (2006). Afferentation of the lateral nidopallium: A tracing study of a brain area involved in sexual imprinting in the zebra finch *Taeniopygia guttata). Brain research, 1106(1), 111-122. https://doi.org/10.1016/j.brainres.2006.04.009 Sex: Undetermined Age: Adult Method: RITC
CLM	HVC Shelf	Zebra Finch	**Zebra Finch** *Taeniopygia guttata* Vates, G. E., Broome, B. M., Mello, C. V., & Nottebohm, F. (1996). Auditory pathways of caudal telencephalon and their relation to the song system of adult male zebra finches. The Journal of comparative neurology, 366(4), 613-642. https://doi.org/10.1002/(SICI)1096-9861(19960318)366:4<613::AID-CNE5>3.0.CO;2-7 Sex: Males Age: Adult (>P120) Method: BDA (3kDa) o…
CLM	CSt	Non-Zebra Finch	**Bengalese Finch** *Lonchura striata domestica* Dunning, J. L., Maze, S. E., Atwood, E. J., & Prather, J. F. (2018). Caudal mesopallial neurons in female songbirds bridge sensory and motor brain regions. The Journal of comparative neurology, 526(10), 1703-1711. https://doi.org/10.1002/cne.24440 Sex: Females Age: Adult (>P120) Method: BDA (10kDa)
CLM	NCM	Zebra Finch	**Zebra Finch** *Taeniopygia guttata* Bauer, E. E., Coleman, M. J., Roberts, T. F., Roy, A., Prather, J. F., & Mooney, R. (2008). A synaptic basis for auditory-vocal integration in the songbird. The Journal of neuroscience : the official journal of the Society for Neuroscience, 28(6), 1509-1522. https://doi.org/10.1523/JNEUROSCI.3838-07.2008 Sex: Males Age: Adult (>P90) Method: lentivirus (GFP or…
CLM	L3	Zebra Finch	**Zebra Finch** *Taeniopygia guttata* Vates, G. E., Broome, B. M., Mello, C. V., & Nottebohm, F. (1996). Auditory pathways of caudal telencephalon and their relation to the song system of adult male zebra finches. The Journal of comparative neurology, 366(4), 613-642. https://doi.org/10.1002/(SICI)1096-9861(19960318)366:4<613::AID-CNE5>3.0.CO;2-7 Sex: Males Age: Adult (>P120) Method: BDA (3kDa) o…
CMM	CLM	Zebra Finch	**Zebra Finch** *Taeniopygia guttata* Vates, G. E., Broome, B. M., Mello, C. V., & Nottebohm, F. (1996). Auditory pathways of caudal telencephalon and their relation to the song system of adult male zebra finches. The Journal of comparative neurology, 366(4), 613-642. https://doi.org/10.1002/(SICI)1096-9861(19960318)366:4<613::AID-CNE5>3.0.CO;2-7 Sex: Males Age: Adult (>P120) Method: BDA (3kDa) o…
CMM	AI	Zebra Finch	**Zebra Finch** *Taeniopygia guttata* Sadananda, M., Korte, S., & Bischof, H. J. (2007). Afferentation of a caudal forebrain area activated during courtship behavior: a tracing study in the zebra finch (Taeniopygia guttata). Brain research, 1184, 108-120. https://doi.org/10.1016/j.brainres.2007.09.040 Sex: Males Age: Adult Method: Rhodamine B-Isothiocyanate and Diamidino Yellow (Dihydrochloride);…
CMM	NCM	Zebra Finch	**Zebra Finch** *Taeniopygia guttata* Barr, H. J., Wall, E. M., & Woolley, S. C. (2021). Dopamine in the songbird auditory cortex shapes auditory preference. Current biology : CB, 31(20), 4547-4559.e5. https://doi.org/10.1016/j.cub.2021.08.005 Sex: Females Age: Adult Method: retrograde tracer Texas-red conjugated dextran --- **Zebra Finch** *Taeniopygia guttata* Vates, G. E., Broome, B. M., Mello…
CMM	NCL	Zebra Finch	**Zebra Finch** *Taeniopygia guttata* Sadananda, M., Korte, S., & Bischof, H. J. (2007). Afferentation of a caudal forebrain area activated during courtship behavior: a tracing study in the zebra finch *Taeniopygia guttata). Brain research, 1184, 108-120. https://doi.org/10.1016/j.brainres.2007.09.040 Sex: Males Age: Adult Method: Rhodamine B-Isothiocyanate and Diamidino Yellow (Dihydrochloride);…
Cochlea	NM	Zebra Finch	**Zebra Finch** *Taeniopygia guttata* Krützfeldt, N. O., Logerot, P., Kubke, M. F., & Wild, J. M. (2010). Connections of the auditory brainstem in a songbird, Taeniopygia guttata. I. Projections of nucleus angularis and nucleus laminaris to the auditory torus. The Journal of comparative neurology, 518(11), 2109-2134. https://doi.org/10.1002/cne.22334 Sex: Males Age: Adult (>P100) Method: BDA (10k…
Cochlea	NA	Zebra Finch	**Zebra Finch** *Taeniopygia guttata* Wild, J. M., Krützfeldt, N. O., & Kubke, M. F. (2010). Connections of the auditory brainstem in a songbird, Taeniopygia guttata. III. Projections of the superior olive and lateral lemniscal nuclei. The Journal of comparative neurology, 518(11), 2149–2167. https://doi.org/10.1002/cne.22325 Sex: Males Age: Adult Method: BDA
Cornea	CuE	Zebra Finch	**Zebra Finch** *Taeniopygia guttata* Faunes, M., & Wild, J. M. (2017). The sensory trigeminal complex and the organization of its primary afferents in the zebra finch *Taeniopygia guttata). The Journal of comparative neurology, 525(13), 2820-2831. https://doi.org/10.1002/cne.24249 Sex: Males Age: Adult Method: Transganglionic CTB labeling
Cornea	nTTDc	Zebra Finch	**Zebra Finch** *Taeniopygia guttata* Faunes, M., & Wild, J. M. (2017). The sensory trigeminal complex and the organization of its primary afferents in the zebra finch *Taeniopygia guttata). The Journal of comparative neurology, 525(13), 2820-2831. https://doi.org/10.1002/cne.24249 Sex: Males Age: Adult Method: Transganglionic CTB labeling
CSt	HA (Rostral)	Zebra Finch	**Zebra Finch** *Taeniopygia guttata* Wild, J. M., & Williams, M. N. (1999). Rostral wulst of passerine birds: II. Intratelencephalic projections to nuclei associated with the auditory and song systems. The Journal of comparative neurology, 413(4), 520-534. https://doi.org/10.1002/(sici)1096-9861(19991101)413:4<520::aid-cne3>3.0.co;2-b Sex: Undetermined Age: Not Reported Method: BDA, CTB
CSt	SN	Zebra Finch	**Zebra Finch** *Taeniopygia guttata* Yeh, Y.-T. (2022). Auditory Tuning in Vocal Learning Songbirds. (Doctoral dissertation). Columbia University. Retrieved from https://academiccommons.columbia.edu/doi/10.7916/1hh4-4z76/download Sex: Males Age: Adult Method: BDA
CSt	RA Cup	Zebra Finch	**Zebra Finch** *Taeniopygia guttata* Mello, C. V., Vates, G. E., Okuhata, S., & Nottebohm, F. (1998). Descending auditory pathways in the adult male zebra finch *Taeniopygia guttata*. The Journal of comparative neurology, 395(2), 137-160. https://doi.org/10.1002/(SICI)1096-9861(19980601)395:2<137::AID-CNE1>3.0.CO;2-3 Sex: Males Age: Adult (>P120) Method: rhodamine beads
Cu	CG	Non-Zebra Finch	**Greenfinch** *Chloris chloris* Wild J. M. (1997). The avian somatosensory system: the pathway from wing to Wulst in a passerine (Chloris chloris). Brain research, 759(1), 122-134. https://doi.org/10.1016/s0006-8993(97)00253-9 Sex: Undetermined Age: Not Reported Method: WGA-HRP
Cu	Rt	Non-Zebra Finch	**Greenfinch** *Chloris chloris* Wild J. M. (1997). The avian somatosensory system: the pathway from wing to Wulst in a passerine (Chloris chloris). Brain research, 759(1), 122-134. https://doi.org/10.1016/s0006-8993(97)00253-9 Sex: Undetermined Age: Not Reported Method: WGA-HRP
Cu	nTOv	Non-Zebra Finch	**Greenfinch** *Chloris chloris* Wild J. M. (1997). The avian somatosensory system: the pathway from wing to Wulst in a passerine (Chloris chloris). Brain research, 759(1), 122-134. https://doi.org/10.1016/s0006-8993(97)00253-9 Sex: Undetermined Age: Not Reported Method: WGA-HRP
Cu	NR	Non-Zebra Finch	**Greenfinch** *Chloris chloris* Wild J. M. (1997). The avian somatosensory system: the pathway from wing to Wulst in a passerine (Chloris chloris). Brain research, 759(1), 122-134. https://doi.org/10.1016/s0006-8993(97)00253-9 Sex: Undetermined Age: Not Reported Method: WGA-HRP
Cu	MLd	Zebra Finch|Non-Zebra Finch	**Zebra Finch** *Taeniopygia guttata* Faunes, M., & Wild, J. M. (2017). The ascending projections of the nuclei of the descending trigeminal tract (nTTD) in the zebra finch *Taeniopygia guttata). The Journal of comparative neurology, 525(13), 2832-2846. https://doi.org/10.1002/cne.24247 Sex: Undetermined Age: Adult Method: retrograde tracer BDA or CTB --- **Eurasian Blackcap** *Sylvia atricapilla…
Cu	Uva	Zebra Finch|Non-Zebra Finch	**Zebra Finch** *Taeniopygia guttata* Coleman, M. J., Roy, A., Wild, J. M., & Mooney, R. (2007). Thalamic gating of auditory responses in telencephalic song control nuclei. The Journal of neuroscience : the official journal of the Society for Neuroscience, 27(37), 10024-10036. https://doi.org/10.1523/JNEUROSCI.2215-07.2007 Sex: Males Age: Adult (>P120) Method: CTB --- **Zebra Finch** *Taeniopygia…
Cu	ICo	Zebra Finch|Non-Zebra Finch	**Greenfinch** *Chloris chloris* Wild J. M. (1997). The avian somatosensory system: the pathway from wing to Wulst in a passerine (Chloris chloris). Brain research, 759(1), 122-134. https://doi.org/10.1016/s0006-8993(97)00253-9 Sex: Undetermined Age: Not Reported Method: WGA-HRP --- **Zebra Finch** *Taeniopygia guttata* Wild, J. M., & Williams, M. N. (2000). Rostral wulst in passerine birds. I. O…
Cu	DIVA	Non-Zebra Finch	**Greenfinch** *Chloris chloris* Wild J. M. (1997). The avian somatosensory system: the pathway from wing to Wulst in a passerine (Chloris chloris). Brain research, 759(1), 122-134. https://doi.org/10.1016/s0006-8993(97)00253-9 Sex: Undetermined Age: Not Reported Method: WGA-HRP
Cu	PAm	Zebra Finch	**Zebra Finch** *Taeniopygia guttata* Reinke, H. and Wild, J.M. (1998), Identification and connections of inspiratory premotor neurons in songbirds and budgerigar. J. Comp. Neurol., 391: 147-163. https://doi.org/10.1002/(SICI)1096-9861(19980209)391:2<147::AID-CNE1>3.0.CO;2-2 Sex: Male Age: Not Reported Method: BDA (10kDa)
CuE	DIVA	Zebra Finch|Non-Zebra Finch	**Zebra Finch** *Taeniopygia guttata* Faunes, M., & Wild, J. M. (2017). The ascending projections of the nuclei of the descending trigeminal tract (nTTD) in the zebra finch *Taeniopygia guttata). The Journal of comparative neurology, 525(13), 2832-2846. https://doi.org/10.1002/cne.24247 Sex: Undetermined Age: Adult Method: retrograde tracer BDA or CTB --- **Greenfinch** *Chloris chloris* Wild J. …
CuE	IO	Zebra Finch	**Zebra Finch** *Taeniopygia guttata* Faunes, M., & Wild, J. M. (2017). The ascending projections of the nuclei of the descending trigeminal tract (nTTD) in the zebra finch *Taeniopygia guttata). The Journal of comparative neurology, 525(13), 2832-2846. https://doi.org/10.1002/cne.24247 Sex: Undetermined Age: Adult Method: retrograde tracer BDA or CTB
CuE	PrV	Zebra Finch	**Zebra Finch** *Taeniopygia guttata* Faunes, M., & Wild, J. M. (2017). The ascending projections of the nuclei of the descending trigeminal tract (nTTD) in the zebra finch *Taeniopygia guttata). The Journal of comparative neurology, 525(13), 2832-2846. https://doi.org/10.1002/cne.24247 Sex: Undetermined Age: Adult Method: retrograde tracer BDA or CTB
CuE	Uva	Zebra Finch|Non-Zebra Finch	**Zebra Finch** *Taeniopygia guttata* Coleman, M. J., Roy, A., Wild, J. M., & Mooney, R. (2007). Thalamic gating of auditory responses in telencephalic song control nuclei. The Journal of neuroscience : the official journal of the Society for Neuroscience, 27(37), 10024-10036. https://doi.org/10.1523/JNEUROSCI.2215-07.2007 Sex: Males Age: Adult (>P120) Method: CTB --- **Zebra Finch** *Taeniopygia…
DCN	ICo	Non-Zebra Finch	**Bengalese Finch** *Lonchura striata domestica* Nicholson, D.A., Roberts, T.F., & Sober, S.J. (2018). Thalamostriatal and cerebellothalamic pathways in a songbird, the Bengalese Finch. The Journal of comparative neurology, 526(9), 1550-1570. https://doi.org/10.1002/cne.24428. c/o https://doi.org/10.6084/m9.figshare.5437975 Sex: Males Age: Adult (>P90) Method: lentivirus; AAV
DCN	CG	Zebra Finch	**Zebra Finch** *Taeniopygia guttata* Ben-Tov, M., Duarte, F., & Mooney, R. (2023). A neural hub for holistic courtship displays. Current biology : CB, 33(9), 1640-1653.e5. https://doi.org/10.1016/j.cub.2023.02.072 Sex: Males Age: Adult Method: Retrobeads
DCN	ALp	Non-Zebra Finch	**Bengalese Finch** *Lonchura striata domestica* Nicholson, D.A., Roberts, T.F., & Sober, S.J. (2018). Thalamostriatal and cerebellothalamic pathways in a songbird, the Bengalese Finch. The Journal of comparative neurology, 526(9), 1550-1570. https://doi.org/10.1002/cne.24428 Sex: Males Age: Adult (>P90) Method: lentivirus; AAV
DCN	NR	Zebra Finch|Non-Zebra Finch	**Bengalese Finch** *Lonchura striata domestica* Nicholson, D.A., Roberts, T.F., & Sober, S.J. (2018). Thalamostriatal and cerebellothalamic pathways in a songbird, the Bengalese Finch. The Journal of comparative neurology, 526(9), 1550-1570. https://doi.org/10.1002/cne.24428 Sex: Males Age: Adult (>P90) Method: lentivirus; AAV --- **Zebra Finch** *Taeniopygia guttata* Wild, J. M., & Williams, M.…
DCN	SpM	Non-Zebra Finch	**Bengalese Finch** *Lonchura striata domestica* Nicholson, D.A., Roberts, T.F., & Sober, S.J. (2018). Thalamostriatal and cerebellothalamic pathways in a songbird, the Bengalese Finch. The Journal of comparative neurology, 526(9), 1550-1570. https://doi.org/10.1002/cne.24428 Sex: Males Age: Adult (>P90) Method: lentivirus; AAV
DCN	DT (CbN)	Zebra Finch|Non-Zebra Finch	**Bengalese Finch** *Lonchura striata domestica* Nicholson, D.A., Roberts, T.F., & Sober, S.J. (2018). Thalamostriatal and cerebellothalamic pathways in a songbird, the Bengalese Finch. The Journal of comparative neurology, 526(9), 1550-1570. https://doi.org/10.1002/cne.24428 Sex: Males Age: Adult (>P90) Method: lentivirus; AAV --- **Zebra Finch** *Taeniopygia guttata* Pidoux, L., Le Blanc, P., L…
DCN	Uva	Zebra Finch	**Zebra Finch** *Taeniopygia guttata* Wild J. M. (1994). Visual and somatosensory inputs to the avian song system via nucleus uvaeformis (Uva) and a comparison with the projections of a similar thalamic nucleus in a nonsongbird, Columba livia. The Journal of comparative neurology, 349(4), 512-535. https://doi.org/10.1002/cne.903490403 Sex: Males Age: Not Reported Method: retrograde tracer confirm…
DCN	PPC	Non-Zebra Finch	**Bengalese Finch** *Lonchura striata domestica* Nicholson, D.A., Roberts, T.F., & Sober, S.J. (2018). Thalamostriatal and cerebellothalamic pathways in a songbird, the Bengalese Finch. The Journal of comparative neurology, 526(9), 1550-1570. https://doi.org/10.1002/cne.24428. c/o https://doi.org/10.6084/m9.figshare.5437975 Sex: Males Age: Adult (>P90) Method: lentivirus; AAV
DCN	DMP	Zebra Finch	**Zebra Finch** *Taeniopygia guttata* Person, A. L., Gale, S. D., Farries, M. A., & Perkel, D. J. (2008). Organization of the songbird basal ganglia, including area X. The Journal of comparative neurology, 508(5), 840-866. https://doi.org/10.1002/cne.21699 Sex: Males Age: Adult Method: BDA
DCN	DMA	Zebra Finch	**Zebra Finch** *Taeniopygia guttata* Person, A. L., Gale, S. D., Farries, M. A., & Perkel, D. J. (2008). Organization of the songbird basal ganglia, including area X. The Journal of comparative neurology, 508(5), 840-866. https://doi.org/10.1002/cne.21699 Sex: Males Age: Adult Method: BDA
DCN	STN	Non-Zebra Finch	**Bengalese Finch** *Lonchura striata domestica* Nicholson, D.A., Roberts, T.F., & Sober, S.J. (2018). Thalamostriatal and cerebellothalamic pathways in a songbird, the Bengalese Finch. The Journal of comparative neurology, 526(9), 1550-1570. https://doi.org/10.1002/cne.24428 Sex: Males Age: Adult (>P90) Method: lentivirus; AAV
DCN	PT	Non-Zebra Finch	**Bengalese Finch** *Lonchura striata domestica* Nicholson, D.A., Roberts, T.F., & Sober, S.J. (2018). Thalamostriatal and cerebellothalamic pathways in a songbird, the Bengalese Finch. The Journal of comparative neurology, 526(9), 1550-1570. https://doi.org/10.1002/cne.24428 Sex: Males Age: Adult (>P90) Method: lentivirus; AAV
DIP	Area X	Zebra Finch	**Zebra Finch** *Taeniopygia guttata* Lewis, J. W., Ryan, S. M., Arnold, A. P., & Butcher, L. L. (1981). Evidence for a catecholaminergic projection to area X in the zebra finch. The Journal of comparative neurology, 196(2), 347-354. https://doi.org/10.1002/cne.901960212 Sex: Males Age: Adult Method: HRP/o-dianisidine
DIP	HA (Caudal)	Zebra Finch	**Zebra Finch** *Taeniopygia guttata* Nixdorf, B. E., & Bischof, H. J. (1982). Afferent connections of the ectostriatum and visual wulst in the zebra finch *Taeniopygia guttata castanotis Gould)--an HRP study. Brain research, 248(1), 9-17. https://doi.org/10.1016/0006-8993(82)91142-8 Sex: Males Age: Adult Method: HRP
DIVA	IHA	Zebra Finch|Non-Zebra Finch	**Greenfinch** *Chloris chloris* Wild J. M. (1997). The avian somatosensory system: the pathway from wing to Wulst in a passerine (Chloris chloris). Brain research, 759(1), 122-134. https://doi.org/10.1016/s0006-8993(97)00253-9 Sex: Undetermined Age: Not Reported Method: iontophoretic injection of BDA --- **Zebra Finch** *Taeniopygia guttata* Wild, J. M., & Williams, M. N. (2000). A direct cerebr…
DIVA	HA (Rostral)	Zebra Finch|Non-Zebra Finch	**Zebra Finch** *Taeniopygia guttata* Faunes, M., & Wild, J. M. (2017). The ascending projections of the nuclei of the descending trigeminal tract (nTTD) in the zebra finch *Taeniopygia guttata). The Journal of comparative neurology, 525(13), 2832-2846. https://doi.org/10.1002/cne.24247 Sex: Males and Females Age: Adult Method: retrograde tracer BDA or CTB --- **Zebra Finch** *Taeniopygia guttata…
DLA	HA (Caudal)	Zebra Finch	**Zebra Finch** *Taeniopygia guttata* Bischof, H. J., Eckmeier, D., Keary, N., Löwel, S., Mayer, U., & Michael, N. (2016). Multiple Visual Field Representations in the Visual Wulst of a Laterally Eyed Bird, the Zebra Finch *Taeniopygia guttata). PloS one, 11(5), e0154927. https://doi.org/10.1371/journal.pone.0154927 Sex: Males Age: Not Reported Method: 3kDa fluor dextrans
DLHp	LS	Zebra Finch|Non-Zebra Finch	**Zebra Finch** *Taeniopygia guttata* Foster, E. F., & Bottjer, S. W. (1998). Axonal connections of the high vocal center and surrounding cortical regions in juvenile and adult male zebra finches. The Journal of comparative neurology, 397(1), 118-138. https://doi.org/10.1002/(SICI)1096-9861(19980720)397:1<118::AID-CNE9>3.0.CO;2-3 Sex: Males Age: Adults and Juvenlies (20-30 pdh) Method: rhodamine …
DLHp	NCL	Non-Zebra Finch	**Carrion Crow** *Corvus corone* Kersten, Y., Moll, F. W., Erdle, S., & Nieder, A. (2024). Input and Output Connections of the Crow Nidopallium Caudolaterale. eNeuro, 11(4), ENEURO.0098-24.2024. https://doi.org/10.1523/ENEURO.0098-24.2024 Sex: Males Age: Adult (8-12 years) Method: retrograde CTB
DLHp	MS	Non-Zebra Finch	**Canary** *Serinus canaria* Kelley, D. B., & Nottebohm, F. (1979). Projections of a telencephalic auditory nucleus-field L-in the canary. The Journal of comparative neurology, 183(3), 455–469. https://doi.org/10.1002/cne.901830302 Sex: Males and Females Age: Adult Method: Leucine or Proline tracers
DLHp	MSt	Zebra Finch	**Zebra Finch** *Taeniopygia guttata* Székely A. D. (1999). The avian hippocampal formation: subdivisions and connectivity. Behavioural brain research, 98(2), 219-225. https://doi.org/10.1016/s0166-4328(98)00087-4 Sex: Not Reported Age: Not Reported Method: Phaseolus vulgaris-leucoagglutinin (PHA-L)
DLHp	PoA	Zebra Finch	**Zebra Finch** *Taeniopygia guttata* Székely A. D. (1999). The avian hippocampal formation: subdivisions and connectivity. Behavioural brain research, 98(2), 219-225. https://doi.org/10.1016/s0166-4328(98)00087-4 Sex: Not Reported Age: Not Reported Method: Phaseolus vulgaris-leucoagglutinin (PHA-L) --- **Zebra Finch** *Taeniopygia guttata* Székely, A. D., & Krebs, J. R. (1996). Efferent connecti…
DLHp	CDL	Zebra Finch|Non-Zebra Finch	**Zebra Finch** *Taeniopygia guttata* Székely A. D. (1999). The avian hippocampal formation: subdivisions and connectivity. Behavioural brain research, 98(2), 219-225. https://doi.org/10.1016/s0166-4328(98)00087-4 Sex: Not Reported Age: Not Reported Method: Phaseolus vulgaris-leucoagglutinin (PHA-L) --- **Zebra Finch** *Taeniopygia guttata* Székely, A. D., & Krebs, J. R. (1996). Efferent connecti…
DLHp	PVN	Zebra Finch	**Zebra Finch** *Taeniopygia guttata* Székely A. D. (1999). The avian hippocampal formation: subdivisions and connectivity. Behavioural brain research, 98(2), 219-225. https://doi.org/10.1016/s0166-4328(98)00087-4 Sex: Not Reported Age: Not Reported Method: Phaseolus vulgaris-leucoagglutinin (PHA-L) --- **Zebra Finch** *Taeniopygia guttata* Székely, A. D., & Krebs, J. R. (1996). Efferent connecti…
DLHp	AM	Non-Zebra Finch	**Canary** *Serinus canaria* Kelley, D. B., & Nottebohm, F. (1979). Projections of a telencephalic auditory nucleus-field L-in the canary. The Journal of comparative neurology, 183(3), 455–469. https://doi.org/10.1002/cne.901830302 Sex: Males and Females Age: Adult Method: Leucine or Proline tracers
DLHp	SCE	Zebra Finch	**Zebra Finch** *Taeniopygia guttata* Székely A. D. (1999). The avian hippocampal formation: subdivisions and connectivity. Behavioural brain research, 98(2), 219-225. https://doi.org/10.1016/s0166-4328(98)00087-4 Sex: Not Reported Age: Not Reported Method: Phaseolus vulgaris-leucoagglutinin (PHA-L) --- **Zebra Finch** *Taeniopygia guttata* Székely, A. D., & Krebs, J. R. (1996). Efferent connecti…
DLHp	VHp	Zebra Finch|Non-Zebra Finch	**Zebra Finch** *Taeniopygia guttata* Székely A. D. (1999). The avian hippocampal formation: subdivisions and connectivity. Behavioural brain research, 98(2), 219-225. https://doi.org/10.1016/s0166-4328(98)00087-4 Sex: Not Reported Age: Not Reported Method: Phaseolus vulgaris-leucoagglutinin (PHA-L) --- **Zebra Finch** *Taeniopygia guttata* Székely, A. D., & Krebs, J. R. (1996). Efferent connecti…
DLHp	DMHp	Non-Zebra Finch	**Black-capped Chickadee** *Poecile atricapillus* Applegate, M. C., Gutnichenko, K. S., Mackevicius, E. L., Aronov, D. (2023). An entorhinal-like region in food-caching birds. Current Biology, 33(12), 2465-2477.e7. https://doi.org/10.1016/j.cub.2023.05.031 Sex: Undetermined Age: Adult (>P120) Method: CTB -- **Canary** *Serinus canaria* Kelley, D. B., & Nottebohm, F. (1979). Projections of a telen…
DLHp	NAc	Zebra Finch|Non-Zebra Finch	**Zebra Finch** *Taeniopygia guttata* Székely, A. D., & Krebs, J. R. (1996). Efferent connectivity of the hippocampal formation of the zebra finch *Taenopygia guttata): an anterograde pathway tracing study using Phaseolus vulgaris leucoagglutinin. The Journal of comparative neurology, 368(2), 198-214. https://doi.org/10.1002/(SICI)1096-9861(19960429)368:2<198::AID-CNE3>3.0.CO;2-Z Sex: Undetermine…
DLHp	POA	Non-Zebra Finch	**Canary** *Serinus canaria* Kelley, D. B., & Nottebohm, F. (1979). Projections of a telencephalic auditory nucleus-field L-in the canary. The Journal of comparative neurology, 183(3), 455–469. https://doi.org/10.1002/cne.901830302 Sex: Males and Females Age: Adult Method: Leucine or Proline tracers
DLHp	CG	Zebra Finch	**Zebra Finch** *Taeniopygia guttata* Székely A. D. (1999). The avian hippocampal formation: subdivisions and connectivity. Behavioural brain research, 98(2), 219-225. https://doi.org/10.1016/s0166-4328(98)00087-4 Sex: Not Reported Age: Not Reported Method: Phaseolus vulgaris-leucoagglutinin (PHA-L) --- **Zebra Finch** *Taeniopygia guttata* Székely, A. D., & Krebs, J. R. (1996). Efferent connecti…
DLHp	NDB	Zebra Finch	**Zebra Finch** *Taeniopygia guttata* Székely A. D. (1999). The avian hippocampal formation: subdivisions and connectivity. Behavioural brain research, 98(2), 219-225. https://doi.org/10.1016/s0166-4328(98)00087-4 Sex: Not Reported Age: Not Reported Method: Phaseolus vulgaris-leucoagglutinin (PHA-L) --- **Zebra Finch** *Taeniopygia guttata* Székely, A. D., & Krebs, J. R. (1996). Efferent connecti…
DLHp	HD	Zebra Finch|Non-Zebra Finch	**Zebra Finch** *Taeniopygia guttata* Székely A. D. (1999). The avian hippocampal formation: subdivisions and connectivity. Behavioural brain research, 98(2), 219-225. https://doi.org/10.1016/s0166-4328(98)00087-4 Sex: Not Reported Age: Not Reported Method: Phaseolus vulgaris-leucoagglutinin (PHA-L) --- **Zebra Finch** *Taeniopygia guttata* Székely, A. D., & Krebs, J. R. (1996). Efferent connecti…
DLHp	OTu	Zebra Finch	**Zebra Finch** *Taeniopygia guttata* Székely, A. D., & Krebs, J. R. (1996). Efferent connectivity of the hippocampal formation of the zebra finch *Taenopygia guttata): an anterograde pathway tracing study using Phaseolus vulgaris leucoagglutinin. The Journal of comparative neurology, 368(2), 198-214. https://doi.org/10.1002/(SICI)1096-9861(19960429)368:2<198::AID-CNE3>3.0.CO;2-Z Sex: Undetermine…
DLHp	TnA	Zebra Finch|Non-Zebra Finch	**European Starling** *Sturnus vulgaris* Cheng, M., Chaiken, M., Zuo, M., & Miller, H. (1999). Nucleus taenia of the amygdala of birds: anatomical and functional studies in ring doves (Streptopelia risoria) and European Starlings (Sturnus vulgaris). Brain, behavior and evolution, 53(5-6), 243-270. https://doi.org/10.1159/000006597 Sex: Males Age: Adult (>P450) Method: FluoroGold --- **Zebra Finch…
DLHp	VTA	Zebra Finch	**Zebra Finch** *Taeniopygia guttata* Székely A. D. (1999). The avian hippocampal formation: subdivisions and connectivity. Behavioural brain research, 98(2), 219-225. https://doi.org/10.1016/s0166-4328(98)00087-4 Sex: Not Reported Age: Not Reported Method: Phaseolus vulgaris-leucoagglutinin (PHA-L) --- **Zebra Finch** *Taeniopygia guttata* Székely, A. D., & Krebs, J. R. (1996). Efferent connecti…
DLHp	EM	Zebra Finch	**Zebra Finch** *Taeniopygia guttata* Székely A. D. (1999). The avian hippocampal formation: subdivisions and connectivity. Behavioural brain research, 98(2), 219-225. https://doi.org/10.1016/s0166-4328(98)00087-4 Sex: Not Reported Age: Not Reported Method: Phaseolus vulgaris-leucoagglutinin (PHA-L) --- **Zebra Finch** *Taeniopygia guttata* Székely, A. D., & Krebs, J. R. (1996). Efferent connecti…
DLHp	VP	Zebra Finch	**Zebra Finch** *Taeniopygia guttata* Székely, A. D., & Krebs, J. R. (1996). Efferent connectivity of the hippocampal formation of the zebra finch *Taenopygia guttata): an anterograde pathway tracing study using Phaseolus vulgaris leucoagglutinin. The Journal of comparative neurology, 368(2), 198-214. https://doi.org/10.1002/(SICI)1096-9861(19960429)368:2<198::AID-CNE3>3.0.CO;2-Z Sex: Undetermine…
DLHp	DMP	Zebra Finch	**Zebra Finch** *Taeniopygia guttata* Székely A. D. (1999). The avian hippocampal formation: subdivisions and connectivity. Behavioural brain research, 98(2), 219-225. https://doi.org/10.1016/s0166-4328(98)00087-4 Sex: Not Reported Age: Not Reported Method: Phaseolus vulgaris-leucoagglutinin (PHA-L) --- **Zebra Finch** *Taeniopygia guttata* Székely, A. D., & Krebs, J. R. (1996). Efferent connecti…
DLHp	SHb	Zebra Finch	**Zebra Finch** *Taeniopygia guttata* Székely A. D. (1999). The avian hippocampal formation: subdivisions and connectivity. Behavioural brain research, 98(2), 219-225. https://doi.org/10.1016/s0166-4328(98)00087-4 Sex: Not Reported Age: Not Reported Method: Phaseolus vulgaris-leucoagglutinin (PHA-L) --- **Zebra Finch** *Taeniopygia guttata* Székely, A. D., & Krebs, J. R. (1996). Efferent connecti…
DLHp	HA (Caudal)	Zebra Finch|Non-Zebra Finch	**Zebra Finch** *Taeniopygia guttata* Székely A. D. (1999). The avian hippocampal formation: subdivisions and connectivity. Behavioural brain research, 98(2), 219-225. https://doi.org/10.1016/s0166-4328(98)00087-4 Sex: Not Reported Age: Not Reported Method: Phaseolus vulgaris-leucoagglutinin (PHA-L) --- **Zebra Finch** *Taeniopygia guttata* Székely, A. D., & Krebs, J. R. (1996). Efferent connecti…
DLL	HD	Zebra Finch	**Zebra Finch** *Taeniopygia guttata* Nixdorf, B. E., & Bischof, H. J. (1982). Afferent connections of the ectostriatum and visual wulst in the zebra finch (Taeniopygia guttata castanotis Gould)--an HRP study. Brain research, 248(1), 9-17. https://doi.org/10.1016/0006-8993(82)91142-8 Sex: Males Age: Adult Method: HRP
DLL	HI	Zebra Finch	**Zebra Finch** *Taeniopygia guttata* Nixdorf, B. E., & Bischof, H. J. (1982). Afferent connections of the ectostriatum and visual wulst in the zebra finch *Taeniopygia guttata castanotis Gould)--an HRP study. Brain research, 248(1), 9-17. https://doi.org/10.1016/0006-8993(82)91142-8 Sex: Males Age: Adult Method: HRP
DLL	Area X	Zebra Finch	**Zebra Finch** *Taeniopygia guttata* Castelino, C. B., Diekamp, B., & Ball, G. F. (2007). Noradrenergic projections to the song control nucleus area X of the medial striatum in male zebra finches (Taeniopygia guttata). The Journal of comparative neurology, 502(4), 544-562. https://doi.org/10.1002/cne.21337 Sex: Males Age: Adult Method: retrograde tracer CTB, anterograde tracer BDA
DLL	HA (Caudal)	Zebra Finch|Non-Zebra Finch	**Zebra Finch** *Taeniopygia guttata* Bischof, H. J., Eckmeier, D., Keary, N., Löwel, S., Mayer, U., & Michael, N. (2016). Multiple Visual Field Representations in the Visual Wulst of a Laterally Eyed Bird, the Zebra Finch *Taeniopygia guttata). PloS one, 11(5), e0154927. https://doi.org/10.1371/journal.pone.0154927 Sex: Males Age: Not Reported Method: 3kDa fluor dextrans --- **Zebra Finch** *Tae…
DLL	LSt	Zebra Finch	**Zebra Finch** *Taeniopygia guttata* Person, A. L., Gale, S. D., Farries, M. A., & Perkel, D. J. (2008). Organization of the songbird basal ganglia, including area X. The Journal of comparative neurology, 508(5), 840-866. https://doi.org/10.1002/cne.21699 Sex: Males Age: Adult Method: BDA
DLM	LMAN	Zebra Finch	**Zebra Finch** *Taeniopygia guttata* Bottjer, S. W., Halsema, K. A., Brown, S. A., & Miesner, E. A. (1989). Axonal connections of a forebrain nucleus involved with vocal learning in zebra finches. The Journal of comparative neurology, 279(2), 312-326. https://doi.org/10.1002/cne.902790211 Sex: Males Age: Adult (>P90) Method: WGA-HRP --- **Zebra Finch** *Taeniopygia guttata* Li, R., & Sakaguchi, …
DLM	MSt	Zebra Finch	**Zebra Finch** *Taeniopygia guttata* Person, A. L., Gale, S. D., Farries, M. A., & Perkel, D. J. (2008). Organization of the songbird basal ganglia, including area X. The Journal of comparative neurology, 508(5), 840-866. https://doi.org/10.1002/cne.21699 Sex: Males Age: Adult Method: BDA
DLM	DLHp	Non-Zebra Finch	**Black-capped Chickadee** *Poecile atricapillus* Applegate, M. C., Gutnichenko, K. S., & Aronov, D. (2023). Topography of inputs into the hippocampal formation of a food-caching bird. Journal of Comparative Neurology, 531, 1669-1688. https://doi.org/10.1002/cne.25533 Sex: Undetermined Age: Adult (>P120) Method: CTB
DLM	NCL	Non-Zebra Finch	**Carrion Crow** *Corvus corone* Kersten, Y., Moll, F. W., Erdle, S., & Nieder, A. (2024). Input and Output Connections of the Crow Nidopallium Caudolaterale. eNeuro, 11(4), ENEURO.0098-24.2024. https://doi.org/10.1523/ENEURO.0098-24.2024 Sex: Males Age: Adult (8-12 years) Method: retrograde CTB
DLM	VP	Zebra Finch	**Zebra Finch** *Taeniopygia guttata* Chen, R., Puzerey, P. A., Roeser, A. C., Riccelli, T. E., Podury, A., Maher, K., Farhang, A. R., & Goldberg, J. H. (2019). Songbird Ventral Pallidum Sends Diverse Performance Error Signals to Dopaminergic Midbrain. Neuron, 103(2), 266-276.e4. https://doi.org/10.1016/j.neuron.2019.04.038 Sex: Males Age: Adult Method: scAAV9 GFP --- **Zebra Finch** *Taeniopygia…
DLP	Area X	Zebra Finch	**Zebra Finch** *Taeniopygia guttata* Castelino, C. B., Diekamp, B., & Ball, G. F. (2007). Noradrenergic projections to the song control nucleus area X of the medial striatum in male zebra finches (Taeniopygia guttata). The Journal of comparative neurology, 502(4), 544-562. https://doi.org/10.1002/cne.21337 Sex: Males Age: Adult Method: retrograde tracer CTB, anterograde tracer BDA
DLP	HA (Caudal)	Zebra Finch	**Zebra Finch** *Taeniopygia guttata* Nixdorf, B. E., & Bischof, H. J. (1982). Afferent connections of the ectostriatum and visual wulst in the zebra finch *Taeniopygia guttata castanotis Gould)--an HRP study. Brain research, 248(1), 9-17. https://doi.org/10.1016/0006-8993(82)91142-8 Sex: Males Age: Adult Method: HRP
DM	CG	Zebra Finch	**Zebra Finch** *Taeniopygia guttata* Striedter, G. F., & Vu, E. T. (1998). Bilateral feedback projections to the forebrain in the premotor network for singing in zebra finches. Journal of neurobiology, 34(1), 27-40. https://doi.org/10.1002/(SICI)1097-4695(199801)34:1%3C27::AID-NEU3%3E3.0.CO;2-E Sex: Males Age: Adult Method: BDA
DM	PAm	Zebra Finch	**Zebra Finch** *Taeniopygia guttata* Reinke, H. and Wild, J.M. (1998), Identification and connections of inspiratory premotor neurons in songbirds and budgerigar. J. Comp. Neurol., 391: 147-163. https://doi.org/10.1002/(SICI)1096-9861(19980209)391:2<147::AID-CNE1>3.0.CO;2-2 Sex: Not Reported Age: Not Reported Method: BDA and CTB --- **Zebra Finch** *Taeniopygia guttata* Wild, J. M., Li, D., & Ea…
DM	Uva	Zebra Finch	**Zebra Finch** *Taeniopygia guttata* Striedter, G. F., & Vu, E. T. (1998). Bilateral feedback projections to the forebrain in the premotor network for singing in zebra finches. Journal of neurobiology, 34(1), 27-40. https://doi.org/10.1002/(SICI)1097-4695(199801)34:1%3C27::AID-NEU3%3E3.0.CO;2-E Sex: Males Age: Adult Method: BDA, dextran, fluorogold
DM	RVL	Zebra Finch	**Zebra Finch** *Taeniopygia guttata* Striedter, G. F., & Vu, E. T. (1998). Bilateral feedback projections to the forebrain in the premotor network for singing in zebra finches. Journal of neurobiology, 34(1), 27-40. https://doi.org/10.1002/(SICI)1097-4695(199801)34:1%3C27::AID-NEU3%3E3.0.CO;2-E Sex: Males Age: Adult Method: BDA --- **Zebra Finch** *Taeniopygia guttata* Wild, J. M., Li, D., & Eag…
DM	IOS	Zebra Finch	**Zebra Finch** *Taeniopygia guttata* Wild, J. M., Li, D., & Eagleton, C. (1997). Projections of the dorsomedial nucleus of the intercollicular complex (DM) in relation to respiratory-vocal nuclei in the brainstem of pigeon (Columba livia) and zebra finch (Taeniopygia guttata). The Journal of comparative neurology, 377(3), 392-413. https://doi.org/10.1002/(sici)1096-9861(19970120)377:3<392::aid-c…
DM	PBvl	Zebra Finch	**Zebra Finch** *Taeniopygia guttata* Striedter, G. F., & Vu, E. T. (1998). Bilateral feedback projections to the forebrain in the premotor network for singing in zebra finches. Journal of neurobiology, 34(1), 27-40. https://doi.org/10.1002/(SICI)1097-4695(199801)34:1%3C27::AID-NEU3%3E3.0.CO;2-E Sex: Males Age: Adult Method: BDA --- **Zebra Finch** *Taeniopygia guttata* Wild, J. M., Li, D., & Eag…
DM	ICo	Zebra Finch	**Zebra Finch** *Taeniopygia guttata* Striedter, G. F., & Vu, E. T. (1998). Bilateral feedback projections to the forebrain in the premotor network for singing in zebra finches. Journal of neurobiology, 34(1), 27-40. https://doi.org/10.1002/(SICI)1097-4695(199801)34:1%3C27::AID-NEU3%3E3.0.CO;2-E Sex: Males Age: Adult Method: BDA
DM	RAm	Zebra Finch|Non-Zebra Finch	**Zebra Finch** *Taeniopygia guttata* Striedter, G. F., & Vu, E. T. (1998). Bilateral feedback projections to the forebrain in the premotor network for singing in zebra finches. Journal of neurobiology, 34(1), 27-40. https://doi.org/10.1002/(SICI)1097-4695(199801)34:1%3C27::AID-NEU3%3E3.0.CO;2-E Sex: Males Age: Adult Method: BDA --- **Canary** *Serinus canaria* Wild, J. M., & Botelho, J. F. (2015…
DM	DMP	Zebra Finch	**Zebra Finch** *Taeniopygia guttata* Striedter, G. F., & Vu, E. T. (1998). Bilateral feedback projections to the forebrain in the premotor network for singing in zebra finches. Journal of neurobiology, 34(1), 27-40. https://doi.org/10.1002/(SICI)1097-4695(199801)34:1%3C27::AID-NEU3%3E3.0.CO;2-E Sex: Males Age: Adult Method: BDA
DM	nXII(ts)	Zebra Finch	**Zebra Finch** *Taeniopygia guttata* Striedter, G. F., & Vu, E. T. (1998). Bilateral feedback projections to the forebrain in the premotor network for singing in zebra finches. Journal of neurobiology, 34(1), 27-40. https://doi.org/10.1002/(SICI)1097-4695(199801)34:1%3C27::AID-NEU3%3E3.0.CO;2-E Sex: Males Age: Adult Method: BDA --- **Zebra Finch** *Taeniopygia guttata* Wild, J. M., Li, D., & Eag…
DM	NR	Zebra Finch	**Zebra Finch** *Taeniopygia guttata* Wild, J. M., Li, D., & Eagleton, C. (1997). Projections of the dorsomedial nucleus of the intercollicular complex (DM) in relation to respiratory-vocal nuclei in the brainstem of pigeon (Columba livia) and zebra finch (Taeniopygia guttata). The Journal of comparative neurology, 377(3), 392-413. https://doi.org/10.1002/(sici)1096-9861(19970120)377:3<392::aid-c…
DMA	MSt	Zebra Finch	**Zebra Finch** *Taeniopygia guttata* Person, A. L., Gale, S. D., Farries, M. A., & Perkel, D. J. (2008). Organization of the songbird basal ganglia, including area X. The Journal of comparative neurology, 508(5), 840-866. https://doi.org/10.1002/cne.21699 Sex: Males Age: Adult Method: BDA
DMA	NCL	Non-Zebra Finch	**Carrion Crow** *Corvus corone* Kersten, Y., Moll, F. W., Erdle, S., & Nieder, A. (2024). Input and Output Connections of the Crow Nidopallium Caudolaterale. eNeuro, 11(4), ENEURO.0098-24.2024. https://doi.org/10.1523/ENEURO.0098-24.2024 Sex: Males Age: Adult (8-12 years) Method: retrograde CTB
DMA	VP	Zebra Finch	**Zebra Finch** *Taeniopygia guttata* Person, A. L., Gale, S. D., Farries, M. A., & Perkel, D. J. (2008). Organization of the songbird basal ganglia, including area X. The Journal of comparative neurology, 508(5), 840-866. https://doi.org/10.1002/cne.21699 Sex: Males Age: Adult Method: BDA
DMHp	HA (Caudal)	Zebra Finch|Non-Zebra Finch	**Zebra Finch** *Taeniopygia guttata* Székely A. D. (1999). The avian hippocampal formation: subdivisions and connectivity. Behavioural brain research, 98(2), 219-225. https://doi.org/10.1016/s0166-4328(98)00087-4 Sex: Not Reported Age: Not Reported Method: Phaseolus vulgaris-leucoagglutinin (PHA-L) --- **Zebra Finch** *Taeniopygia guttata* Székely, A. D., & Krebs, J. R. (1996). Efferent connecti…
DMHp	CDL	Non-Zebra Finch	**Black-capped Chickadee** *Poecile atricapillus* Applegate, M. C., Gutnichenko, K. S., Mackevicius, E. L., Aronov, D. (2023). An entorhinal-like region in food-caching birds. Current Biology, 33(12), 2465-2477.e7. https://doi.org/10.1016/j.cub.2023.05.031 Sex: Males Age: Adult (>P120) Method: AAV
DMHp	VHp	Zebra Finch|Non-Zebra Finch	**Zebra Finch** *Taeniopygia guttata* Székely A. D. (1999). The avian hippocampal formation: subdivisions and connectivity. Behavioural brain research, 98(2), 219-225. https://doi.org/10.1016/s0166-4328(98)00087-4 Sex: Not Reported Age: Not Reported Method: Phaseolus vulgaris-leucoagglutinin (PHA-L) --- **Zebra Finch** *Taeniopygia guttata* Székely, A. D., & Krebs, J. R. (1996). Efferent connecti…
DMHp	DLHp	Zebra Finch|Non-Zebra Finch	**Black-capped Chickadee** *Poecile atricapillus* Applegate, M. C., Gutnichenko, K. S., Mackevicius, E. L., Aronov, D. (2023). An entorhinal-like region in food-caching birds. Current Biology, 33(12), 2465-2477.e7. https://doi.org/10.1016/j.cub.2023.05.031 Sex: Males Age: Adult (>P120) Method: AAV --- **Zebra Finch** *Taeniopygia guttata* Székely A. D. (1999). The avian hippocampal formation: sub…
DMHp	MS	Zebra Finch	**Zebra Finch** *Taeniopygia guttata* Székely A. D. (1999). The avian hippocampal formation: subdivisions and connectivity. Behavioural brain research, 98(2), 219-225. https://doi.org/10.1016/s0166-4328(98)00087-4 Sex: Not Reported Age: Not Reported Method: Phaseolus vulgaris-leucoagglutinin (PHA-L) --- **Zebra Finch** *Taeniopygia guttata* Székely, A. D., & Krebs, J. R. (1996). Efferent connecti…
DMP	VP	Zebra Finch	**Zebra Finch** *Taeniopygia guttata* Li, R., Zuo, M. X., & Sakaguchi, H. (1999). Auditory-vocal cholinergic pathway in zebra finch brain. Neuroreport, 10(1), 165-169. https://doi.org/10.1097/00001756-199901180-00032 Sex: Males Age: Adult Method: anterograde and retrograde tracer BDA; retrograde tracer fluoro-red
DMP	NCL	Non-Zebra Finch	**Carrion Crow** *Corvus corone* Kersten, Y., Moll, F. W., Erdle, S., & Nieder, A. (2024). Input and Output Connections of the Crow Nidopallium Caudolaterale. eNeuro, 11(4), ENEURO.0098-24.2024. https://doi.org/10.1523/ENEURO.0098-24.2024 Sex: Males Age: Adult (8-12 years) Method: retrograde CTB
DMP	LMAN	Zebra Finch	**Zebra Finch** *Taeniopygia guttata* Foster, E. F., Mehta, R. P., & Bottjer, S. W. (1997). Axonal connections of the medial magnocellular nucleus of the anterior neostriatum in zebra finches. The Journal of comparative neurology, 382(3), 364-381. https://doi.org/10.1002/cne.903820305 Sex: Males Age: Adult Method: biocytin
DMP	MSt	Zebra Finch	**Zebra Finch** *Taeniopygia guttata* Person, A. L., Gale, S. D., Farries, M. A., & Perkel, D. J. (2008). Organization of the songbird basal ganglia, including area X. The Journal of comparative neurology, 508(5), 840-866. https://doi.org/10.1002/cne.21699 Sex: Males Age: Adult Method: BDA
DMP	MMAN	Zebra Finch|Non-Zebra Finch	**Zebra Finch** *Taeniopygia guttata* Foster, E. F., Mehta, R. P., & Bottjer, S. W. (1997). Axonal connections of the medial magnocellular nucleus of the anterior neostriatum in zebra finches. The Journal of comparative neurology, 382(3), 364-381. https://doi.org/10.1002/cne.903820305 Sex: Males Age: Adult Method: DiI --- **Zebra Finch** & Canary** Vates, G. E., Vicario, D. S., & Nottebohm, F. (1…
DMP	Area X	Zebra Finch	**Zebra Finch** *Taeniopygia guttata* Castelino, C. B., Diekamp, B., & Ball, G. F. (2007). Noradrenergic projections to the song control nucleus area X of the medial striatum in male zebra finches (Taeniopygia guttata). The Journal of comparative neurology, 502(4), 544-562. https://doi.org/10.1002/cne.21337 Sex: Males Age: Adult Method: retrograde tracer CTB, anterograde tracer BDA --- **Zebra Fi…
DT (CbN)	NIM	Non-Zebra Finch	**Bengalese Finch** *Lonchura striata domestica* Nicholson, D.A., Roberts, T.F., & Sober, S.J. (2018). Thalamostriatal and cerebellothalamic pathways in a songbird, the Bengalese Finch. The Journal of comparative neurology, 526(9), 1550-1570. https://doi.org/10.1002/cne.24428 Sex: Males Age: Adult (>P90) Method: lentivirus; AAV
DT (CbN)	MSt	Non-Zebra Finch	**Bengalese Finch** *Lonchura striata domestica* Nicholson, D.A., Roberts, T.F., & Sober, S.J. (2018). Thalamostriatal and cerebellothalamic pathways in a songbird, the Bengalese Finch. The Journal of comparative neurology, 526(9), 1550-1570. https://doi.org/10.1002/cne.24428 Sex: Males Age: Adult (>P90) Method: lentivirus; AAV
DT (CbN)	Area X	Zebra Finch|Non-Zebra Finch	**Bengalese Finch** *Lonchura striata domestica* Nicholson, D.A., Roberts, T.F., & Sober, S.J. (2018). Thalamostriatal and cerebellothalamic pathways in a songbird, the Bengalese Finch. The Journal of comparative neurology, 526(9), 1550-1570. https://doi.org/10.1002/cne.24428 Sex: Males Age: Adult (>P90) Method: lentivirus; AAV --- **Zebra Finch** *Taeniopygia guttata* Pidoux, L., Le Blanc, P., L…
E	NCL	Zebra Finch	**Zebra Finch** *Taeniopygia guttata* Hsiao, Y. T., Chen, T. C., Yu, P. H., Huang, D. S., Hu, F. R., Chuong, C. M., & Chang, F. C. (2020). Connectivity between nidopallium caudolateral and visual pathways in color perception of zebra finches. Scientific reports, 10(1), 19382. https://doi.org/10.1038/s41598-020-76542-z Sex: Males Age: Adult Method: retrograde tracer, 4% fluorogold
E	NIL	Zebra Finch	**Zebra Finch** *Taeniopygia guttata* Krützfeldt, N. O., & Wild, J. M. (2004). Definition and connections of the entopallium in the zebra finch *Taeniopygia guttata). The Journal of comparative neurology, 468(3), 452-465. https://doi.org/10.1002/cne.10972 Sex: Males and Females Age: Not Reported Method: BDA --- **Zebra Finch** *Taeniopygia guttata* Sadananda, M., & Bischof, H. J. (2006). Afferent…
E	LSt	Zebra Finch	**Zebra Finch** *Taeniopygia guttata* Krützfeldt, N. O., & Wild, J. M. (2004). Definition and connections of the entopallium in the zebra finch *Taeniopygia guttata). The Journal of comparative neurology, 468(3), 452-465. https://doi.org/10.1002/cne.10972 Sex: Males and Females Age: Not Reported Method: BDA
E	Ep	Zebra Finch	**Zebra Finch** *Taeniopygia guttata* Krützfeldt, N. O., & Wild, J. M. (2004). Definition and connections of the entopallium in the zebra finch *Taeniopygia guttata). The Journal of comparative neurology, 468(3), 452-465. https://doi.org/10.1002/cne.10972 Sex: Males and Females Age: Not Reported Method: BDA --- **Zebra Finch** *Taeniopygia guttata* Sadananda, M., & Bischof, H. J. (2006). Afferent…
E	GP	Zebra Finch	**Zebra Finch** *Taeniopygia guttata* Krützfeldt, N. O., & Wild, J. M. (2004). Definition and connections of the entopallium in the zebra finch *Taeniopygia guttata). The Journal of comparative neurology, 468(3), 452-465. https://doi.org/10.1002/cne.10972 Sex: Males and Females Age: Not Reported Method: BDA
E	MVL	Zebra Finch	**Zebra Finch** *Taeniopygia guttata* Krützfeldt, N. O., & Wild, J. M. (2004). Definition and connections of the entopallium in the zebra finch *Taeniopygia guttata). The Journal of comparative neurology, 468(3), 452-465. https://doi.org/10.1002/cne.10972 Sex: Males and Females Age: Not Reported Method: BDA --- **Zebra Finch** *Taeniopygia guttata* Sadananda, M., & Bischof, H. J. (2006). Afferent…
Ep	NCL	Zebra Finch	**Zebra Finch** *Taeniopygia guttata* Sadananda, M., Korte, S., & Bischof, H. J. (2007). Afferentation of a caudal forebrain area activated during courtship behavior: a tracing study in the zebra finch *Taeniopygia guttata). Brain research, 1184, 108-120. https://doi.org/10.1016/j.brainres.2007.09.040 Sex: Males Age: Adult Method: Rhodamine B-Isothiocyanate and Diamidino Yellow (Dihydrochloride);…
Ep	NIL	Zebra Finch	**Zebra Finch** *Taeniopygia guttata* Sadananda, M., & Bischof, H. J. (2006). Afferentation of the lateral nidopallium: A tracing study of a brain area involved in sexual imprinting in the zebra finch *Taeniopygia guttata). Brain research, 1106(1), 111-122. https://doi.org/10.1016/j.brainres.2006.04.009 Sex: Undetermined Age: Adult Method: BDA; RITC
FLM	NCL	Zebra Finch	**Zebra Finch** *Taeniopygia guttata* Wild, J. M., & Farabaugh, S. M. (1996). Organization of afferent and efferent projections of the nucleus basalis prosencephali in a passerine, Taeniopygia guttata. The Journal of comparative neurology, 365(2), 306-328. https://doi.org/10.1002/(SICI)1096-9861(19960205)365:2<306::AID-CNE8>3.0.CO;2-9 Sex: Males Age: Adult Method: BDA, CTB, evoked potentials
FLM	HA (Rostral)	Zebra Finch	**Zebra Finch** *Taeniopygia guttata* Wild, J. M., & Williams, M. N. (1999). Rostral wulst of passerine birds: II. Intratelencephalic projections to nuclei associated with the auditory and song systems. The Journal of comparative neurology, 413(4), 520-534. https://doi.org/10.1002/(sici)1096-9861(19991101)413:4<520::aid-cne3>3.0.co;2-b Sex: Undetermined Age: Not Reported Method: BDA
FLM	NIL	Zebra Finch	**Zebra Finch** *Taeniopygia guttata* Sadananda, M., & Bischof, H. J. (2006). Afferentation of the lateral nidopallium: A tracing study of a brain area involved in sexual imprinting in the zebra finch *Taeniopygia guttata). Brain research, 1106(1), 111-122. https://doi.org/10.1016/j.brainres.2006.04.009 Sex: Undetermined Age: Adult Method: BDA
FRL	NFL	Zebra Finch	**Zebra Finch** *Taeniopygia guttata* Sadananda, M., & Bischof, H. J. (2006). Afferentation of the lateral nidopallium: A tracing study of a brain area involved in sexual imprinting in the zebra finch *Taeniopygia guttata). Brain research, 1106(1), 111-122. https://doi.org/10.1016/j.brainres.2006.04.009 Sex: Undetermined Age: Adult Method: RITC
FRL	NIL	Zebra Finch	**Zebra Finch** *Taeniopygia guttata* Sadananda, M., & Bischof, H. J. (2006). Afferentation of the lateral nidopallium: A tracing study of a brain area involved in sexual imprinting in the zebra finch *Taeniopygia guttata). Brain research, 1106(1), 111-122. https://doi.org/10.1016/j.brainres.2006.04.009 Sex: Undetermined Age: Adult Method: RITC
FRL	NCL	Zebra Finch	**Zebra Finch** *Taeniopygia guttata* Sadananda, M., Korte, S., & Bischof, H. J. (2007). Afferentation of a caudal forebrain area activated during courtship behavior: a tracing study in the zebra finch *Taeniopygia guttata). Brain research, 1184, 108-120. https://doi.org/10.1016/j.brainres.2007.09.040 Sex: Males Age: Adult Method: Rhodamine B-Isothiocyanate and Diamidino Yellow (Dihydrochloride);…
FRL	AI	Zebra Finch	**Zebra Finch** *Taeniopygia guttata* Sadananda, M., Korte, S., & Bischof, H. J. (2007). Afferentation of a caudal forebrain area activated during courtship behavior: a tracing study in the zebra finch *Taeniopygia guttata). Brain research, 1184, 108-120. https://doi.org/10.1016/j.brainres.2007.09.040 Sex: Males Age: Adult Method: Rhodamine B-Isothiocyanate and Diamidino Yellow (Dihydrochloride);…
FRL	Uva	Zebra Finch	**Zebra Finch** *Taeniopygia guttata* Wild, J. M., & Gaede, A. H. (2016). Second tectofugal pathway in a songbird *Taeniopygia guttata) revisited: Tectal and lateral pontine projections to the posterior thalamus, thence to the intermediate nidopallium. The Journal of comparative neurology, 524(5), 963-985. https://doi.org/10.1002/cne.23886 Sex: Undetermined Age: Adult (>P100) Method: CTB
FRM	NCL	Zebra Finch	**Zebra Finch** *Taeniopygia guttata* Sadananda, M., Korte, S., & Bischof, H. J. (2007). Afferentation of a caudal forebrain area activated during courtship behavior: a tracing study in the zebra finch *Taeniopygia guttata). Brain research, 1184, 108-120. https://doi.org/10.1016/j.brainres.2007.09.040 Sex: Males Age: Adult Method: Rhodamine B-Isothiocyanate and Diamidino Yellow (Dihydrochloride);…
G	DIVA	Zebra Finch|Non-Zebra Finch	**Zebra Finch** *Taeniopygia guttata* Faunes, M., & Wild, J. M. (2017). The ascending projections of the nuclei of the descending trigeminal tract (nTTD) in the zebra finch *Taeniopygia guttata). The Journal of comparative neurology, 525(13), 2832-2846. https://doi.org/10.1002/cne.24247 Sex: Undetermined Age: Adult Method: retrograde tracer BDA or CTB --- **Greenfinch** *Chloris chloris* Wild J. …
G	Uva	Zebra Finch|Non-Zebra Finch	**Zebra Finch** *Taeniopygia guttata* Coleman, M. J., Roy, A., Wild, J. M., & Mooney, R. (2007). Thalamic gating of auditory responses in telencephalic song control nuclei. The Journal of neuroscience : the official journal of the Society for Neuroscience, 27(37), 10024-10036. https://doi.org/10.1523/JNEUROSCI.2215-07.2007 Sex: Males Age: Adult (>P120) Method: CTB --- **Zebra Finch** *Taeniopygia…
G	MLd	Zebra Finch	**Zebra Finch** *Taeniopygia guttata* Faunes, M., & Wild, J. M. (2017). The ascending projections of the nuclei of the descending trigeminal tract (nTTD) in the zebra finch *Taeniopygia guttata). The Journal of comparative neurology, 525(13), 2832-2846. https://doi.org/10.1002/cne.24247 Sex: Undetermined Age: Adult Method: retrograde tracer BDA or CTB
G	IO	Zebra Finch	**Zebra Finch** *Taeniopygia guttata* Faunes, M., & Wild, J. M. (2017). The ascending projections of the nuclei of the descending trigeminal tract (nTTD) in the zebra finch *Taeniopygia guttata). The Journal of comparative neurology, 525(13), 2832-2846. https://doi.org/10.1002/cne.24247 Sex: Undetermined Age: Adult Method: retrograde tracer BDA or CTB
G	CG	Non-Zebra Finch	**Greenfinch** *Chloris chloris* Wild J. M. (1997). The avian somatosensory system: the pathway from wing to Wulst in a passerine (Chloris chloris). Brain research, 759(1), 122-134. https://doi.org/10.1016/s0006-8993(97)00253-9 Sex: Undetermined Age: Not Reported Method: WGA-HRP
G	PAm	Zebra Finch	**Zebra Finch** *Taeniopygia guttata* Reinke, H. and Wild, J.M. (1998), Identification and connections of inspiratory premotor neurons in songbirds and budgerigar. J. Comp. Neurol., 391: 147-163. https://doi.org/10.1002/(SICI)1096-9861(19980209)391:2<147::AID-CNE1>3.0.CO;2-2 Sex: Male Age: Not Reported Method: BDA (10kDa) and CTB
GLv	OCb	Zebra Finch	**Zebra Finch** *Taeniopygia guttata* Gaede, A. H., Gutierrez-Ibanez, C., Armstrong, M. S., Altshuler, D. L., & Wylie, D. R. (2019). Pretectal projections to the oculomotor cerebellum in hummingbirds (Calypte anna), zebra finches *Taeniopygia guttata), and pigeons (Columba livia). The Journal of comparative neurology, 527(16), 2644-2658. https://doi.org/10.1002/cne.24697 Sex: Males Age: Adult Met…
GLv	OT	Zebra Finch	**Zebra Finch** *Taeniopygia guttata* Gaede, A. H., Gutiérrez-Ibáñez, C., Wu, P. H., Pilon, M. C., Altshuler, D. L., & Wylie, D. R. (2024). Topography of visual and somatosensory inputs to the pontine nuclei in zebra finches *Taeniopygia guttata). The Journal of comparative neurology, 532(2), e25556. https://doi.org/10.1002/cne.25556 Sex: Males Age: Adult Method: anterograde tracing Texas red and…
GLv	PM	Zebra Finch	**Zebra Finch** *Taeniopygia guttata* Gaede, A. H., Gutiérrez-Ibáñez, C., Wu, P. H., Pilon, M. C., Altshuler, D. L., & Wylie, D. R. (2024). Topography of visual and somatosensory inputs to the pontine nuclei in zebra finches *Taeniopygia guttata). The Journal of comparative neurology, 532(2), e25556. https://doi.org/10.1002/cne.25556 Sex: Males Age: Adult Method: anterograde tracing Texas red and…
GP	SRt	Zebra Finch	**Zebra Finch** *Taeniopygia guttata* Person, A. L., Gale, S. D., Farries, M. A., & Perkel, D. J. (2008). Organization of the songbird basal ganglia, including area X. The Journal of comparative neurology, 508(5), 840-866. https://doi.org/10.1002/cne.21699 Sex: Males Age: Adult Method: BDA
GP	NCL	Non-Zebra Finch	**Carrion Crow** *Corvus corone* Kersten, Y., Moll, F. W., Erdle, S., & Nieder, A. (2024). Input and Output Connections of the Crow Nidopallium Caudolaterale. eNeuro, 11(4), ENEURO.0098-24.2024. https://doi.org/10.1523/ENEURO.0098-24.2024 Sex: Males Age: Adult (8-12 years) Method: retrograde CTB
GP	ICo	Zebra Finch	**Zebra Finch** *Taeniopygia guttata* Wild J. M. (2017). Dorsal pallidal neurons directly link the nidopallium and midbrain in the zebra finch (Taeniopygia guttata). The Journal of comparative neurology, 525(7), 1731-1742. https://doi.org/10.1002/cne.24174 Sex: Undetermined Age: Adult Method: unconjugated CTB --- **Zebra Finch** *Taeniopygia guttata* Wild, J. M., & Williams, M. N. (2000). Rostral…
GP	NIL	Zebra Finch	**Zebra Finch** *Taeniopygia guttata* Sadananda, M., & Bischof, H. J. (2006). Afferentation of the lateral nidopallium: A tracing study of a brain area involved in sexual imprinting in the zebra finch *Taeniopygia guttata). Brain research, 1106(1), 111-122. https://doi.org/10.1016/j.brainres.2006.04.009 Sex: Undetermined Age: Adult Method: BDA
GP	RA Cup	Zebra Finch	**Zebra Finch** *Taeniopygia guttata* Mello, C. V., Vates, G. E., Okuhata, S., & Nottebohm, F. (1998). Descending auditory pathways in the adult male zebra finch *Taeniopygia guttata*. The Journal of comparative neurology, 395(2), 137-160. https://doi.org/10.1002/(SICI)1096-9861(19980601)395:2<137::AID-CNE1>3.0.CO;2-3 Sex: Males Age: Adult (>P120) Method: rhodamine beads
GP	SpM	Zebra Finch	**Zebra Finch** *Taeniopygia guttata* Person, A. L., Gale, S. D., Farries, M. A., & Perkel, D. J. (2008). Organization of the songbird basal ganglia, including area X. The Journal of comparative neurology, 508(5), 840-866. https://doi.org/10.1002/cne.21699 Sex: Males Age: Adult Method: BDA
GP	STN	Zebra Finch	**Zebra Finch** *Taeniopygia guttata* Wild J. M. (2017). Dorsal pallidal neurons directly link the nidopallium and midbrain in the zebra finch (Taeniopygia guttata). The Journal of comparative neurology, 525(7), 1731-1742. https://doi.org/10.1002/cne.24174 Sex: Undetermined Age: Adult Method: retrograde and anterograde tracing with BDA and CTB
GP	VP	Zebra Finch	**Zebra Finch** *Taeniopygia guttata* Person, A. L., Gale, S. D., Farries, M. A., & Perkel, D. J. (2008). Organization of the songbird basal ganglia, including area X. The Journal of comparative neurology, 508(5), 840-866. https://doi.org/10.1002/cne.21699 Sex: Males Age: Adult Method: BDA
GP	RS	Zebra Finch	**Zebra Finch** *Taeniopygia guttata* Person, A. L., Gale, S. D., Farries, M. A., & Perkel, D. J. (2008). Organization of the songbird basal ganglia, including area X. The Journal of comparative neurology, 508(5), 840-866. https://doi.org/10.1002/cne.21699 Sex: Males Age: Adult Method: BDA --- **Zebra Finch** *Taeniopygia guttata* Wild J. M. (2017). Dorsal pallidal neurons directly link the nidop…
GP	LSt	Zebra Finch	**Zebra Finch** *Taeniopygia guttata* Person, A. L., Gale, S. D., Farries, M. A., & Perkel, D. J. (2008). Organization of the songbird basal ganglia, including area X. The Journal of comparative neurology, 508(5), 840-866. https://doi.org/10.1002/cne.21699 Sex: Males Age: Adult Method: BDA
GP	ALp	Zebra Finch	**Zebra Finch** *Taeniopygia guttata* Person, A. L., Gale, S. D., Farries, M. A., & Perkel, D. J. (2008). Organization of the songbird basal ganglia, including area X. The Journal of comparative neurology, 508(5), 840-866. https://doi.org/10.1002/cne.21699 Sex: Males Age: Adult Method: BDA --- **Zebra Finch** *Taeniopygia guttata* Wild J. M. (2017). Dorsal pallidal neurons directly link the nidop…
GP	NIM	Zebra Finch	**Zebra Finch** *Taeniopygia guttata* Wild J. M. (2017). Dorsal pallidal neurons directly link the nidopallium and midbrain in the zebra finch (Taeniopygia guttata). The Journal of comparative neurology, 525(7), 1731-1742. https://doi.org/10.1002/cne.24174 Sex: Undetermined Age: Adult Method: retrograde and anterograde tracing with BDA and CTB
GP	DIP	Zebra Finch	**Zebra Finch** *Taeniopygia guttata* Person, A. L., Gale, S. D., Farries, M. A., & Perkel, D. J. (2008). Organization of the songbird basal ganglia, including area X. The Journal of comparative neurology, 508(5), 840-866. https://doi.org/10.1002/cne.21699 Sex: Males Age: Adult Method: BDA --- **Zebra Finch** *Taeniopygia guttata* Wild J. M. (2017). Dorsal pallidal neurons directly link the nidop…
GP	SN	Zebra Finch	**Zebra Finch** *Taeniopygia guttata* Person, A. L., Gale, S. D., Farries, M. A., & Perkel, D. J. (2008). Organization of the songbird basal ganglia, including area X. The Journal of comparative neurology, 508(5), 840-866. https://doi.org/10.1002/cne.21699 Sex: Males Age: Adult Method: BDA --- **Zebra Finch** *Taeniopygia guttata* Wild J. M. (2017). Dorsal pallidal neurons directly link the nidop…
GP	SpL	Zebra Finch	**Zebra Finch** *Taeniopygia guttata* Person, A. L., Gale, S. D., Farries, M. A., & Perkel, D. J. (2008). Organization of the songbird basal ganglia, including area X. The Journal of comparative neurology, 508(5), 840-866. https://doi.org/10.1002/cne.21699 Sex: Males Age: Adult Method: BDA --- **Zebra Finch** *Taeniopygia guttata* Wild J. M. (2017). Dorsal pallidal neurons directly link the nidop…
GP	NCM	Zebra Finch	**Zebra Finch** *Taeniopygia guttata* Wild J. M. (2017). Dorsal pallidal neurons directly link the nidopallium and midbrain in the zebra finch (Taeniopygia guttata). The Journal of comparative neurology, 525(7), 1731-1742. https://doi.org/10.1002/cne.24174 Sex: Undetermined Age: Adult Method: retrograde and anterograde tracing with BDA and CTB
HA (Caudal)	IMM	Zebra Finch	**Zebra Finch** *Taeniopygia guttata* Székely, A. D., & Krebs, J. R. (1996). Efferent connectivity of the hippocampal formation of the zebra finch *Taenopygia guttata): an anterograde pathway tracing study using Phaseolus vulgaris leucoagglutinin. The Journal of comparative neurology, 368(2), 198-214. https://doi.org/10.1002/(SICI)1096-9861(19960429)368:2<198::AID-CNE3>3.0.CO;2-Z Sex: Undetermine…
HA (Caudal)	PT	Zebra Finch	**Zebra Finch** *Taeniopygia guttata* Székely, A. D., & Krebs, J. R. (1996). Efferent connectivity of the hippocampal formation of the zebra finch *Taenopygia guttata): an anterograde pathway tracing study using Phaseolus vulgaris leucoagglutinin. The Journal of comparative neurology, 368(2), 198-214. https://doi.org/10.1002/(SICI)1096-9861(19960429)368:2<198::AID-CNE3>3.0.CO;2-Z Sex: Undetermine…
HA (Caudal)	DMHp	Non-Zebra Finch	**Garden Warbler** *Sylvia borin* Heyers, D., Musielak, I., Haase, K., Herold, C., Bolte, P., Güntürkün, O., & Mouritsen, H. (2022). Morphology, biochemistry and connectivity of Cluster N and the hippocampal formation in a migratory bird. Brain structure & function, 227(8), 2731–2749. https://doi.org/10.1007/s00429-022-02566-y Sex: Not Reported Age: Not Reported Method: CTB
HA (Caudal)	OT	Zebra Finch	**Zebra Finch** *Taeniopygia guttata* Székely, A. D., & Krebs, J. R. (1996). Efferent connectivity of the hippocampal formation of the zebra finch *Taenopygia guttata): an anterograde pathway tracing study using Phaseolus vulgaris leucoagglutinin. The Journal of comparative neurology, 368(2), 198-214. https://doi.org/10.1002/(SICI)1096-9861(19960429)368:2<198::AID-CNE3>3.0.CO;2-Z Sex: Undetermine…
HA (Caudal)	ILM	Zebra Finch	**Zebra Finch** *Taeniopygia guttata* Székely, A. D., & Krebs, J. R. (1996). Efferent connectivity of the hippocampal formation of the zebra finch *Taenopygia guttata): an anterograde pathway tracing study using Phaseolus vulgaris leucoagglutinin. The Journal of comparative neurology, 368(2), 198-214. https://doi.org/10.1002/(SICI)1096-9861(19960429)368:2<198::AID-CNE3>3.0.CO;2-Z Sex: Undetermine…
HA (Caudal)	NCL	Zebra Finch|Non-Zebra Finch	**Zebra Finch** *Taeniopygia guttata* Hsiao, Y. T., Chen, T. C., Yu, P. H., Huang, D. S., Hu, F. R., Chuong, C. M., & Chang, F. C. (2020). Connectivity between nidopallium caudolateral and visual pathways in color perception of zebra finches. Scientific reports, 10(1), 19382. https://doi.org/10.1038/s41598-020-76542-z Sex: Males Age: Adult Method: retrograde tracer, 4% fluorogold; Granger cauasli…
HA (Caudal)	CDL	Non-Zebra Finch	**Garden Warbler** *Sylvia borin* Heyers, D., Musielak, I., Haase, K., Herold, C., Bolte, P., Güntürkün, O., & Mouritsen, H. (2022). Morphology, biochemistry and connectivity of Cluster N and the hippocampal formation in a migratory bird. Brain structure & function, 227(8), 2731–2749. https://doi.org/10.1007/s00429-022-02566-y Sex: Not Reported Age: Not Reported Method: CTB
HA (Caudal)	MSt	Zebra Finch	**Zebra Finch** *Taeniopygia guttata* Székely, A. D., & Krebs, J. R. (1996). Efferent connectivity of the hippocampal formation of the zebra finch *Taenopygia guttata): an anterograde pathway tracing study using Phaseolus vulgaris leucoagglutinin. The Journal of comparative neurology, 368(2), 198-214. https://doi.org/10.1002/(SICI)1096-9861(19960429)368:2<198::AID-CNE3>3.0.CO;2-Z Sex: Undetermine…
HA (Caudal)	CSt	Zebra Finch	**Zebra Finch** *Taeniopygia guttata* Székely, A. D., & Krebs, J. R. (1996). Efferent connectivity of the hippocampal formation of the zebra finch *Taenopygia guttata): an anterograde pathway tracing study using Phaseolus vulgaris leucoagglutinin. The Journal of comparative neurology, 368(2), 198-214. https://doi.org/10.1002/(SICI)1096-9861(19960429)368:2<198::AID-CNE3>3.0.CO;2-Z Sex: Undetermine…
HA (Caudal)	HI	Zebra Finch|Non-Zebra Finch	**Zebra Finch** *Taeniopygia guttata* Székely, A. D., & Krebs, J. R. (1996). Efferent connectivity of the hippocampal formation of the zebra finch *Taenopygia guttata): an anterograde pathway tracing study using Phaseolus vulgaris leucoagglutinin. The Journal of comparative neurology, 368(2), 198-214. https://doi.org/10.1002/(SICI)1096-9861(19960429)368:2<198::AID-CNE3>3.0.CO;2-Z Sex: Undetermine…
HA (Caudal)	DMP	Zebra Finch	**Zebra Finch** *Taeniopygia guttata* Foster, E. F., Mehta, R. P., & Bottjer, S. W. (1997). Axonal connections of the medial magnocellular nucleus of the anterior neostriatum in zebra finches. The Journal of comparative neurology, 382(3), 364-381. https://doi.org/10.1002/cne.903820305 Sex: Males Age: Adult Method: DiI
HA (Caudal)	DLHp	Non-Zebra Finch	**Garden Warbler** *Sylvia borin* Heyers, D., Musielak, I., Haase, K., Herold, C., Bolte, P., Güntürkün, O., & Mouritsen, H. (2022). Morphology, biochemistry and connectivity of Cluster N and the hippocampal formation in a migratory bird. Brain structure & function, 227(8), 2731–2749. https://doi.org/10.1007/s00429-022-02566-y Sex: Not Reported Age: Not Reported Method: CTB
HA (Caudal)	GLv	Zebra Finch	**Zebra Finch** *Taeniopygia guttata* Székely, A. D., & Krebs, J. R. (1996). Efferent connectivity of the hippocampal formation of the zebra finch *Taenopygia guttata): an anterograde pathway tracing study using Phaseolus vulgaris leucoagglutinin. The Journal of comparative neurology, 368(2), 198-214. https://doi.org/10.1002/(SICI)1096-9861(19960429)368:2<198::AID-CNE3>3.0.CO;2-Z Sex: Undetermine…
HA (Caudal)	NIL	Zebra Finch	**Zebra Finch** *Taeniopygia guttata* Székely, A. D., & Krebs, J. R. (1996). Efferent connectivity of the hippocampal formation of the zebra finch *Taenopygia guttata): an anterograde pathway tracing study using Phaseolus vulgaris leucoagglutinin. The Journal of comparative neurology, 368(2), 198-214. https://doi.org/10.1002/(SICI)1096-9861(19960429)368:2<198::AID-CNE3>3.0.CO;2-Z Sex: Undetermine…
HA (Caudal)	EM	Zebra Finch	**Zebra Finch** *Taeniopygia guttata* Székely, A. D., & Krebs, J. R. (1996). Efferent connectivity of the hippocampal formation of the zebra finch *Taenopygia guttata): an anterograde pathway tracing study using Phaseolus vulgaris leucoagglutinin. The Journal of comparative neurology, 368(2), 198-214. https://doi.org/10.1002/(SICI)1096-9861(19960429)368:2<198::AID-CNE3>3.0.CO;2-Z Sex: Undetermine…
HA (Caudal)	NIM	Zebra Finch	**Zebra Finch** *Taeniopygia guttata* Székely, A. D., & Krebs, J. R. (1996). Efferent connectivity of the hippocampal formation of the zebra finch *Taenopygia guttata): an anterograde pathway tracing study using Phaseolus vulgaris leucoagglutinin. The Journal of comparative neurology, 368(2), 198-214. https://doi.org/10.1002/(SICI)1096-9861(19960429)368:2<198::AID-CNE3>3.0.CO;2-Z Sex: Undetermine…
HA (Caudal)	CLM	Zebra Finch	**Zebra Finch** *Taeniopygia guttata* Székely, A. D., & Krebs, J. R. (1996). Efferent connectivity of the hippocampal formation of the zebra finch *Taenopygia guttata): an anterograde pathway tracing study using Phaseolus vulgaris leucoagglutinin. The Journal of comparative neurology, 368(2), 198-214. https://doi.org/10.1002/(SICI)1096-9861(19960429)368:2<198::AID-CNE3>3.0.CO;2-Z Sex: Undetermine…
HA (Caudal)	PoA	Zebra Finch	**Zebra Finch** *Taeniopygia guttata* Székely, A. D., & Krebs, J. R. (1996). Efferent connectivity of the hippocampal formation of the zebra finch *Taenopygia guttata): an anterograde pathway tracing study using Phaseolus vulgaris leucoagglutinin. The Journal of comparative neurology, 368(2), 198-214. https://doi.org/10.1002/(SICI)1096-9861(19960429)368:2<198::AID-CNE3>3.0.CO;2-Z Sex: Undetermine…
HA (Caudal)	HD	Zebra Finch|Non-Zebra Finch	**Zebra Finch** *Taeniopygia guttata* Székely, A. D., & Krebs, J. R. (1996). Efferent connectivity of the hippocampal formation of the zebra finch *Taenopygia guttata): an anterograde pathway tracing study using Phaseolus vulgaris leucoagglutinin. The Journal of comparative neurology, 368(2), 198-214. https://doi.org/10.1002/(SICI)1096-9861(19960429)368:2<198::AID-CNE3>3.0.CO;2-Z Sex: Undetermine…
HA (Rostral)	LMAN	Zebra Finch	**Zebra Finch** *Taeniopygia guttata* Wild, J. M., & Williams, M. N. (1999). Rostral wulst of passerine birds: II. Intratelencephalic projections to nuclei associated with the auditory and song systems. The Journal of comparative neurology, 413(4), 520-534. https://doi.org/10.1002/(sici)1096-9861(19991101)413:4<520::aid-cne3>3.0.co;2-b Sex: Undetermined Age: Not Reported Method: BDA, CTB
HA (Rostral)	NIL	Zebra Finch	**Zebra Finch** *Taeniopygia guttata* Sadananda, M., & Bischof, H. J. (2006). Afferentation of the lateral nidopallium: A tracing study of a brain area involved in sexual imprinting in the zebra finch *Taeniopygia guttata). Brain research, 1106(1), 111-122. https://doi.org/10.1016/j.brainres.2006.04.009 Sex: Undetermined Age: "fully adult" (no age given) Method: RITC
HA (Rostral)	AI	Zebra Finch	**Zebra Finch** *Taeniopygia guttata* Wild, J. M., & Williams, M. N. (1999). Rostral wulst of passerine birds: II. Intratelencephalic projections to nuclei associated with the auditory and song systems. The Journal of comparative neurology, 413(4), 520-534. https://doi.org/10.1002/(sici)1096-9861(19991101)413:4<520::aid-cne3>3.0.co;2-b Sex: Undetermined Age: Not Reported Method: BDA, CTB
HA (Rostral)	nTTDc	Zebra Finch	**Zebra Finch** *Taeniopygia guttata* Wild, J. M., & Williams, M. N. (2000). Rostral wulst in passerine birds. I. Origin, course, and terminations of an avian pyramidal tract. The Journal of comparative neurology, 416(4), 429-450. https://doi.org/10.1002/(SICI)1096-9861(20000124)416:4<429::AID-CNE2>3.0.CO;2-X Sex: Not Reported Age: Not Reported Method: BDA (10kDa) or CTB
HA (Rostral)	L3	Zebra Finch	**Zebra Finch** *Taeniopygia guttata* Wild, J. M., & Williams, M. N. (1999). Rostral wulst of passerine birds: II. Intratelencephalic projections to nuclei associated with the auditory and song systems. The Journal of comparative neurology, 413(4), 520-534. https://doi.org/10.1002/(sici)1096-9861(19991101)413:4<520::aid-cne3>3.0.co;2-b Sex: Undetermined Age: Not Reported Method: BDA, CTB
HA (Rostral)	CuE	Zebra Finch	**Zebra Finch** *Taeniopygia guttata* Wild, J. M., & Williams, M. N. (2000). Rostral wulst in passerine birds. I. Origin, course, and terminations of an avian pyramidal tract. The Journal of comparative neurology, 416(4), 429-450. https://doi.org/10.1002/(SICI)1096-9861(20000124)416:4<429::AID-CNE2>3.0.CO;2-X Sex: Not Reported Age: Not Reported Method: BDA (10kDa) or CTB
HA (Rostral)	SCE	Zebra Finch	**Zebra Finch** *Taeniopygia guttata* Wild, J. M., & Williams, M. N. (2000). Rostral wulst in passerine birds. I. Origin, course, and terminations of an avian pyramidal tract. The Journal of comparative neurology, 416(4), 429-450. https://doi.org/10.1002/(SICI)1096-9861(20000124)416:4<429::AID-CNE2>3.0.CO;2-X Sex: Not Reported Age: Not Reported Method: BDA (10kDa) or CTB
HA (Rostral)	Area X	Zebra Finch	**Zebra Finch** *Taeniopygia guttata* Castelino, C. B., Diekamp, B., & Ball, G. F. (2007). Noradrenergic projections to the song control nucleus area X of the medial striatum in male zebra finches (Taeniopygia guttata). The Journal of comparative neurology, 502(4), 544-562. https://doi.org/10.1002/cne.21337 Sex: Males Age: Adult Method: retrograde tracer CTB, anterograde tracer BDA --- **Zebra Fi…
HA (Rostral)	SC	Zebra Finch	**Zebra Finch** *Taeniopygia guttata* Wild, J. M., & Williams, M. N. (2000). Rostral wulst in passerine birds. I. Origin, course, and terminations of an avian pyramidal tract. The Journal of comparative neurology, 416(4), 429-450. https://doi.org/10.1002/(SICI)1096-9861(20000124)416:4<429::AID-CNE2>3.0.CO;2-X Sex: Not Reported Age: Not Reported Method: BDA (10kDa) or CTB
HA (Rostral)	NR	Zebra Finch	**Zebra Finch** *Taeniopygia guttata* Wild, J. M., & Williams, M. N. (2000). Rostral wulst in passerine birds. I. Origin, course, and terminations of an avian pyramidal tract. The Journal of comparative neurology, 416(4), 429-450. https://doi.org/10.1002/(SICI)1096-9861(20000124)416:4<429::AID-CNE2>3.0.CO;2-X Sex: Not Reported Age: Not Reported Method: BDA (10kDa) or CTB
HA (Rostral)	LHy	Zebra Finch	**Zebra Finch** *Taeniopygia guttata* Wild, J. M., & Williams, M. N. (2000). Rostral wulst in passerine birds. I. Origin, course, and terminations of an avian pyramidal tract. The Journal of comparative neurology, 416(4), 429-450. https://doi.org/10.1002/(SICI)1096-9861(20000124)416:4<429::AID-CNE2>3.0.CO;2-X Sex: Not Reported Age: Not Reported Method: BDA (10kDa) or CTB
HA (Rostral)	FRM	Zebra Finch	**Zebra Finch** *Taeniopygia guttata* Wild, J. M., & Williams, M. N. (2000). Rostral wulst in passerine birds. I. Origin, course, and terminations of an avian pyramidal tract. The Journal of comparative neurology, 416(4), 429-450. https://doi.org/10.1002/(SICI)1096-9861(20000124)416:4<429::AID-CNE2>3.0.CO;2-X Sex: Not Reported Age: Not Reported Method: BDA (10kDa) or CTB
HA (Rostral)	L1	Zebra Finch	**Zebra Finch** *Taeniopygia guttata* Wild, J. M., & Williams, M. N. (1999). Rostral wulst of passerine birds: II. Intratelencephalic projections to nuclei associated with the auditory and song systems. The Journal of comparative neurology, 413(4), 520-534. https://doi.org/10.1002/(sici)1096-9861(19991101)413:4<520::aid-cne3>3.0.co;2-b Sex: Undetermined Age: Not Reported Method: BDA, CTB
HA (Rostral)	DCN	Zebra Finch	**Zebra Finch** *Taeniopygia guttata* Wild, J. M., & Williams, M. N. (2000). A direct cerebrocerebellar projection in adult birds and rats. Neuroscience, 96(2), 333-339. https://doi.org/10.1016/s0306-4522(99)00546-1 Sex: Males Age: Adult (>90 dph) Method: BDA --- **Zebra Finch** *Taeniopygia guttata* Wild, J. M., & Williams, M. N. (2000). Rostral wulst in passerine birds. I. Origin, course, and t…
HA (Rostral)	NCL	Zebra Finch|Non-Zebra Finch	**Zebra Finch** *Taeniopygia guttata* Wild, J. M., & Williams, M. N. (1999). Rostral wulst of passerine birds: II. Intratelencephalic projections to nuclei associated with the auditory and song systems. The Journal of comparative neurology, 413(4), 520-534. https://doi.org/10.1002/(sici)1096-9861(19991101)413:4<520::aid-cne3>3.0.co;2-b Sex: Undetermined Age: Not Reported Method: BDA, CTB --- **Ca…
HA (Rostral)	OCb	Zebra Finch	**Zebra Finch** *Taeniopygia guttata* Wild, J. M., & Williams, M. N. (2000). A direct cerebrocerebellar projection in adult birds and rats. Neuroscience, 96(2), 333-339. https://doi.org/10.1016/s0306-4522(99)00546-1 Sex: Males Age: Adult (>90 dph) Method: BDA; CTB
HA (Rostral)	NFL	Zebra Finch	**Zebra Finch** *Taeniopygia guttata* Sadananda, M., & Bischof, H. J. (2006). Afferentation of the lateral nidopallium: A tracing study of a brain area involved in sexual imprinting in the zebra finch *Taeniopygia guttata). Brain research, 1106(1), 111-122. https://doi.org/10.1016/j.brainres.2006.04.009 Sex: Undetermined Age: Adult Method: RITC --- **Zebra Finch** *Taeniopygia guttata* Wild, J. M…
HA (Rostral)	IMM	Zebra Finch	**Zebra Finch** *Taeniopygia guttata* Wild, J. M., & Williams, M. N. (1999). Rostral wulst of passerine birds: II. Intratelencephalic projections to nuclei associated with the auditory and song systems. The Journal of comparative neurology, 413(4), 520-534. https://doi.org/10.1002/(sici)1096-9861(19991101)413:4<520::aid-cne3>3.0.co;2-b Sex: Undetermined Age: Not Reported Method: BDA, CTB
HA (Rostral)	PM	Zebra Finch	**Zebra Finch** *Taeniopygia guttata* Gaede, A. H., Gutiérrez-Ibáñez, C., Wu, P. H., Pilon, M. C., Altshuler, D. L., & Wylie, D. R. (2024). Topography of visual and somatosensory inputs to the pontine nuclei in zebra finches (Taeniopygia guttata). The Journal of comparative neurology, 532(2), e25556. https://doi.org/10.1002/cne.25556 Sex: Males Age: Adult Method: anterograde tracing Texas red and…
HA (Rostral)	VeS	Zebra Finch	**Zebra Finch** *Taeniopygia guttata* Wild, J. M., & Williams, M. N. (2000). Rostral wulst in passerine birds. I. Origin, course, and terminations of an avian pyramidal tract. The Journal of comparative neurology, 416(4), 429-450. https://doi.org/10.1002/(SICI)1096-9861(20000124)416:4<429::AID-CNE2>3.0.CO;2-X Sex: Not Reported Age: Not Reported Method: BDA (10kDa) or CTB
HA (Rostral)	MSt	Zebra Finch	**Zebra Finch** *Taeniopygia guttata* Wild, J. M., & Williams, M. N. (1999). Rostral wulst of passerine birds: II. Intratelencephalic projections to nuclei associated with the auditory and song systems. The Journal of comparative neurology, 413(4), 520-534. https://doi.org/10.1002/(sici)1096-9861(19991101)413:4<520::aid-cne3>3.0.co;2-b Sex: Males and Females Age: Not Reported Method: BDA, CTB
HA (Rostral)	IO	Zebra Finch	**Zebra Finch** *Taeniopygia guttata* Wild, J. M., & Williams, M. N. (2000). Rostral wulst in passerine birds. I. Origin, course, and terminations of an avian pyramidal tract. The Journal of comparative neurology, 416(4), 429-450. https://doi.org/10.1002/(SICI)1096-9861(20000124)416:4<429::AID-CNE2>3.0.CO;2-X Sex: Not Reported Age: Not Reported Method: BDA (10kDa) or CTB
HA (Rostral)	VTA	Zebra Finch	**Zebra Finch** *Taeniopygia guttata* Wild, J. M., & Williams, M. N. (2000). Rostral wulst in passerine birds. I. Origin, course, and terminations of an avian pyramidal tract. The Journal of comparative neurology, 416(4), 429-450. https://doi.org/10.1002/(SICI)1096-9861(20000124)416:4<429::AID-CNE2>3.0.CO;2-X Sex: Not Reported Age: Not Reported Method: BDA (10kDa) or CTB
HA (Rostral)	AIV	Zebra Finch	**Zebra Finch** *Taeniopygia guttata* Wild, J. M., & Williams, M. N. (1999). Rostral wulst of passerine birds: II. Intratelencephalic projections to nuclei associated with the auditory and song systems. The Journal of comparative neurology, 413(4), 520-534. https://doi.org/10.1002/(sici)1096-9861(19991101)413:4<520::aid-cne3>3.0.co;2-b Sex: Undetermined Age: Not Reported Method: BDA, CTB
HA (Rostral)	PL	Zebra Finch	**Zebra Finch** *Taeniopygia guttata* Wild, J. M., & Williams, M. N. (2000). Rostral wulst in passerine birds. I. Origin, course, and terminations of an avian pyramidal tract. The Journal of comparative neurology, 416(4), 429-450. https://doi.org/10.1002/(SICI)1096-9861(20000124)416:4<429::AID-CNE2>3.0.CO;2-X Sex: Not Reported Age: Not Reported Method: BDA (10kDa) or CTB
HA (Rostral)	G	Zebra Finch	**Zebra Finch** *Taeniopygia guttata* Wild, J. M., & Williams, M. N. (2000). Rostral wulst in passerine birds. I. Origin, course, and terminations of an avian pyramidal tract. The Journal of comparative neurology, 416(4), 429-450. https://doi.org/10.1002/(SICI)1096-9861(20000124)416:4<429::AID-CNE2>3.0.CO;2-X Sex: Not Reported Age: Not Reported Method: BDA (10kDa) or CTB
HA (Rostral)	ICo	Zebra Finch	**Zebra Finch** *Taeniopygia guttata* Wild, J. M., & Williams, M. N. (2000). Rostral wulst in passerine birds. I. Origin, course, and terminations of an avian pyramidal tract. The Journal of comparative neurology, 416(4), 429-450. https://doi.org/10.1002/(SICI)1096-9861(20000124)416:4<429::AID-CNE2>3.0.CO;2-X Sex: Not Reported Age: Not Reported Method: BDA (10kDa) or CTB
HA (Rostral)	SpM	Zebra Finch	**Zebra Finch** *Taeniopygia guttata* Wild, J. M., & Williams, M. N. (2000). Rostral wulst in passerine birds. I. Origin, course, and terminations of an avian pyramidal tract. The Journal of comparative neurology, 416(4), 429-450. https://doi.org/10.1002/(SICI)1096-9861(20000124)416:4<429::AID-CNE2>3.0.CO;2-X Sex: Not Reported Age: Not Reported Method: BDA (10kDa) or CTB
HA (Rostral)	PPC	Zebra Finch	**Zebra Finch** *Taeniopygia guttata* Wild, J. M., & Williams, M. N. (2000). Rostral wulst in passerine birds. I. Origin, course, and terminations of an avian pyramidal tract. The Journal of comparative neurology, 416(4), 429-450. https://doi.org/10.1002/(SICI)1096-9861(20000124)416:4<429::AID-CNE2>3.0.CO;2-X Sex: Not Reported Age: Not Reported Method: BDA (10kDa) or CTB
HA (Rostral)	LSt	Zebra Finch	**Zebra Finch** *Taeniopygia guttata* Wild, J. M., & Williams, M. N. (1999). Rostral wulst of passerine birds: II. Intratelencephalic projections to nuclei associated with the auditory and song systems. The Journal of comparative neurology, 413(4), 520-534. https://doi.org/10.1002/(sici)1096-9861(19991101)413:4<520::aid-cne3>3.0.co;2-b Sex: Males and Females Age: Not Reported Method: BDA, CTB
HA (Rostral)	NFM	Zebra Finch	**Zebra Finch** *Taeniopygia guttata* Wild, J. M., & Williams, M. N. (1999). Rostral wulst of passerine birds: II. Intratelencephalic projections to nuclei associated with the auditory and song systems. The Journal of comparative neurology, 413(4), 520-534. https://doi.org/10.1002/(sici)1096-9861(19991101)413:4<520::aid-cne3>3.0.co;2-b Sex: Undetermined Age: Not Reported Method: BDA
HA (Rostral)	NIf	Zebra Finch	**Zebra Finch** *Taeniopygia guttata* Wild, J. M., & Williams, M. N. (1999). Rostral wulst of passerine birds: II. Intratelencephalic projections to nuclei associated with the auditory and song systems. The Journal of comparative neurology, 413(4), 520-534. https://doi.org/10.1002/(sici)1096-9861(19991101)413:4<520::aid-cne3>3.0.co;2-b Sex: Undetermined Age: Not Reported Method: CTB
HA (Rostral)	HVC Shelf	Zebra Finch	**Zebra Finch** *Taeniopygia guttata* Wild, J. M., & Williams, M. N. (1999). Rostral wulst of passerine birds: II. Intratelencephalic projections to nuclei associated with the auditory and song systems. The Journal of comparative neurology, 413(4), 520-534. https://doi.org/10.1002/(sici)1096-9861(19991101)413:4<520::aid-cne3>3.0.co;2-b Sex: Undetermined Age: Not Reported Method: BDA, CTB
HA (Rostral)	CSt	Zebra Finch	**Zebra Finch** *Taeniopygia guttata* Wild, J. M., & Williams, M. N. (1999). Rostral wulst of passerine birds: II. Intratelencephalic projections to nuclei associated with the auditory and song systems. The Journal of comparative neurology, 413(4), 520-534. https://doi.org/10.1002/(sici)1096-9861(19991101)413:4<520::aid-cne3>3.0.co;2-b Sex: Undetermined Age: Not Reported Method: BDA
HA (Rostral)	CG	Zebra Finch	**Zebra Finch** *Taeniopygia guttata* Wild, J. M., & Williams, M. N. (2000). Rostral wulst in passerine birds. I. Origin, course, and terminations of an avian pyramidal tract. The Journal of comparative neurology, 416(4), 429-450. https://doi.org/10.1002/(SICI)1096-9861(20000124)416:4<429::AID-CNE2>3.0.CO;2-X Sex: Not Reported Age: Not Reported Method: BDA (10kDa) or CTB
HA (Rostral)	VeM	Zebra Finch	**Zebra Finch** *Taeniopygia guttata* Wild, J. M., & Williams, M. N. (2000). Rostral wulst in passerine birds. I. Origin, course, and terminations of an avian pyramidal tract. The Journal of comparative neurology, 416(4), 429-450. https://doi.org/10.1002/(SICI)1096-9861(20000124)416:4<429::AID-CNE2>3.0.CO;2-X Sex: Not Reported Age: Not Reported Method: BDA (10kDa) or CTB
HA (Rostral)	FRL	Zebra Finch	**Zebra Finch** *Taeniopygia guttata* Wild, J. M., & Williams, M. N. (2000). Rostral wulst in passerine birds. I. Origin, course, and terminations of an avian pyramidal tract. The Journal of comparative neurology, 416(4), 429-450. https://doi.org/10.1002/(SICI)1096-9861(20000124)416:4<429::AID-CNE2>3.0.CO;2-X Sex: Not Reported Age: Not Reported Method: BDA (10kDa) or CTB
HA (Rostral)	HD	Zebra Finch	**Zebra Finch** *Taeniopygia guttata* Sadananda, M., & Bischof, H. J. (2006). Afferentation of the lateral nidopallium: A tracing study of a brain area involved in sexual imprinting in the zebra finch *Taeniopygia guttata). Brain research, 1106(1), 111-122. https://doi.org/10.1016/j.brainres.2006.04.009 Sex: Undetermined Age: Adult Method: BDA
HA (Rostral)	Cu	Zebra Finch	**Zebra Finch** *Taeniopygia guttata* Wild, J. M., & Williams, M. N. (2000). Rostral wulst in passerine birds. I. Origin, course, and terminations of an avian pyramidal tract. The Journal of comparative neurology, 416(4), 429-450. https://doi.org/10.1002/(SICI)1096-9861(20000124)416:4<429::AID-CNE2>3.0.CO;2-X Sex: Not Reported Age: Not Reported Method: BDA (10kDa) or CTB
HA (Rostral)	RA	Zebra Finch	**Zebra Finch** *Taeniopygia guttata* Wild, J. M., & Williams, M. N. (1999). Rostral wulst of passerine birds: II. Intratelencephalic projections to nuclei associated with the auditory and song systems. The Journal of comparative neurology, 413(4), 520-534. https://doi.org/10.1002/(sici)1096-9861(19991101)413:4<520::aid-cne3>3.0.co;2-b Sex: Undetermined Age: Not Reported Method: BDA
HD	DLHp	Non-Zebra Finch	**Black-capped Chickadee** *Poecile atricapillus* Applegate, M. C., Gutnichenko, K. S., & Aronov, D. (2023). Topography of inputs into the hippocampal formation of a food-caching bird. Journal of Comparative Neurology, 531, 1669-1688. https://doi.org/10.1002/cne.25533 Sex: Undetermined Age: Adult (>P120) Method: CTB --- **Black-capped Chickadee** *Poecile atricapillus* Applegate, M. C., Gutnichen…
HD	NCL	Zebra Finch	**Zebra Finch** *Taeniopygia guttata* Sadananda, M., Korte, S., & Bischof, H. J. (2007). Afferentation of a caudal forebrain area activated during courtship behavior: a tracing study in the zebra finch (Taeniopygia guttata). Brain research, 1184, 108-120. https://doi.org/10.1016/j.brainres.2007.09.040 Sex: Males Age: Adult Method: Rhodamine B-Isothiocyanate and Diamidino Yellow (Dihydrochloride);…
HD	Area X	Zebra Finch	**Zebra Finch** *Taeniopygia guttata* Wild, J. M., & Williams, M. N. (1999). Rostral wulst of passerine birds: II. Intratelencephalic projections to nuclei associated with the auditory and song systems. The Journal of comparative neurology, 413(4), 520-534. https://doi.org/10.1002/(sici)1096-9861(19991101)413:4<520::aid-cne3>3.0.co;2-b Sex: Undetermined Age: Not Reported Method: BDA, CTB
HD	NFL	Zebra Finch	**Zebra Finch** *Taeniopygia guttata* Sadananda, M., & Bischof, H. J. (2006). Afferentation of the lateral nidopallium: A tracing study of a brain area involved in sexual imprinting in the zebra finch (Taeniopygia guttata). Brain research, 1106(1), 111-122. https://doi.org/10.1016/j.brainres.2006.04.009 Sex: Undetermined Age: Adult Method: RITC
HD	MSt	Zebra Finch	**Zebra Finch** *Taeniopygia guttata* Wild, J. M., & Williams, M. N. (1999). Rostral wulst of passerine birds: II. Intratelencephalic projections to nuclei associated with the auditory and song systems. The Journal of comparative neurology, 413(4), 520-534. https://doi.org/10.1002/(sici)1096-9861(19991101)413:4<520::aid-cne3>3.0.co;2-b Sex: Undetermined Age: Not Reported Method: BDA, CTB
HD	CDL	Non-Zebra Finch	**Garden Warbler** *Sylvia borin* Heyers, D., Musielak, I., Haase, K., Herold, C., Bolte, P., Güntürkün, O., & Mouritsen, H. (2022). Morphology, biochemistry and connectivity of Cluster N and the hippocampal formation in a migratory bird. Brain structure & function, 227(8), 2731–2749. https://doi.org/10.1007/s00429-022-02566-y Sex: Not Reported Age: Not Reported Method: CTB
HD	DMHp	Non-Zebra Finch	**Black-capped Chickadee** *Poecile atricapillus* Applegate, M. C., Gutnichenko, K. S., Mackevicius, E. L., Aronov, D. (2023). An entorhinal-like region in food-caching birds. Current Biology, 33(12), 2465-2477.e7. https://doi.org/10.1016/j.cub.2023.05.031 Sex: Undetermined Age: Adult (>P120) Method: CTB -- **Garden Warbler** *Sylvia borin* Heyers, D., Musielak, I., Haase, K., Herold, C., Bolte, …
HD	NIL	Zebra Finch	**Zebra Finch** *Taeniopygia guttata* Sadananda, M., & Bischof, H. J. (2006). Afferentation of the lateral nidopallium: A tracing study of a brain area involved in sexual imprinting in the zebra finch *Taeniopygia guttata). Brain research, 1106(1), 111-122. https://doi.org/10.1016/j.brainres.2006.04.009 Sex: Undetermined Age: Adult Method: RITC
HD	HA (Caudal)	Non-Zebra Finch	**Garden Warbler** *Sylvia borin* Heyers, D., Musielak, I., Haase, K., Herold, C., Bolte, P., Güntürkün, O., & Mouritsen, H. (2022). Morphology, biochemistry and connectivity of Cluster N and the hippocampal formation in a migratory bird. Brain structure & function, 227(8), 2731–2749. https://doi.org/10.1007/s00429-022-02566-y Sex: Not Reported Age: Not Reported Method: CTB
HD	HA (Rostral)	Zebra Finch	**Zebra Finch** *Taeniopygia guttata* Wild, J. M., & Williams, M. N. (1999). Rostral wulst of passerine birds: II. Intratelencephalic projections to nuclei associated with the auditory and song systems. The Journal of comparative neurology, 413(4), 520-534. https://doi.org/10.1002/(sici)1096-9861(19991101)413:4<520::aid-cne3>3.0.co;2-b Sex: Undetermined Age: Not Reported Method: BDA, CTB
HD	AI	Zebra Finch	**Zebra Finch** *Taeniopygia guttata* Sadananda, M., Korte, S., & Bischof, H. J. (2007). Afferentation of a caudal forebrain area activated during courtship behavior: a tracing study in the zebra finch *Taeniopygia guttata). Brain research, 1184, 108-120. https://doi.org/10.1016/j.brainres.2007.09.040 Sex: Males Age: Adult Method: Rhodamine B-Isothiocyanate and Diamidino Yellow (Dihydrochloride);…
HI	Area X	Zebra Finch	**Zebra Finch** *Taeniopygia guttata* Wild, J. M., & Williams, M. N. (1999). Rostral wulst of passerine birds: II. Intratelencephalic projections to nuclei associated with the auditory and song systems. The Journal of comparative neurology, 413(4), 520-534. https://doi.org/10.1002/(sici)1096-9861(19991101)413:4<520::aid-cne3>3.0.co;2-b Sex: Undetermined Age: Not Reported Method: BDA, CTB
HI	HA (Caudal)	Non-Zebra Finch	**Garden Warbler** *Sylvia borin* Heyers, D., Musielak, I., Haase, K., Herold, C., Bolte, P., Güntürkün, O., & Mouritsen, H. (2022). Morphology, biochemistry and connectivity of Cluster N and the hippocampal formation in a migratory bird. Brain structure & function, 227(8), 2731–2749. https://doi.org/10.1007/s00429-022-02566-y Sex: Not Reported Age: Not Reported Method: CTB
HI	MSt	Zebra Finch	**Zebra Finch** *Taeniopygia guttata* Wild, J. M., & Williams, M. N. (1999). Rostral wulst of passerine birds: II. Intratelencephalic projections to nuclei associated with the auditory and song systems. The Journal of comparative neurology, 413(4), 520-534. https://doi.org/10.1002/(sici)1096-9861(19991101)413:4<520::aid-cne3>3.0.co;2-b Sex: Undetermined Age: Not Reported Method: BDA, CTB
HVC	AD	Zebra Finch	**Zebra Finch** *Taeniopygia guttata* Foster, E. F., & Bottjer, S. W. (1998). Axonal connections of the high vocal center and surrounding cortical regions in juvenile and adult male zebra finches. The Journal of comparative neurology, 397(1), 118-138. https://doi.org/10.1002/(SICI)1096-9861(19980720)397:1<118::AID-CNE9>3.0.CO;2-3 Sex: Males Age: Adults and Juvenlies (20-30 pdh) Method: rhodamine …
HVC	RA	Zebra Finch|Non-Zebra Finch	**Canary** *Serinus canaria* Appeltants, D., Ball, G. F., & Balthazart, J. (2002). The origin of catecholaminergic inputs to the song control nucleus RA in canaries. Neuroreport, 13(5), 649-653. https://doi.org/10.1097/00001756-200204160-00023 Sex: Males and Females Age: Adult Method: red latex fluospheres --- **Zebra Finch** *Taeniopygia guttata* Bottjer, S. W., Halsema, K. A., Brown, S. A., & M…
HVC	AI	Zebra Finch	**Zebra Finch** *Taeniopygia guttata* Yip, Z. C., Miller-Sims, V. C., & Bottjer, S. W. (2012). Morphology of axonal projections from the high vocal center to vocal motor cortex in songbirds. The Journal of comparative neurology, 520(12), 2742-2756. https://doi.org/10.1002/cne.23084 Sex: Males Age: Adult (>P90) Method: BDA; lentivirus (GFP)
HVC	VP	Zebra Finch	**Zebra Finch** *Taeniopygia guttata* Li, R., Zuo, M. X., & Sakaguchi, H. (1999). Auditory-vocal cholinergic pathway in zebra finch brain. Neuroreport, 10(1), 165-169. https://doi.org/10.1097/00001756-199901180-00032 Sex: Males Age: Adult Method: anterograde and retrograde tracer BDA; retrograde tracer fluoro-red
HVC	Av	Zebra Finch	**Zebra Finch** *Taeniopygia guttata* Shaughnessy, D. W., Hyson, R. L., Bertram, R., Wu, W., & Johnson, F. (2019). Female zebra finches do not sing yet share neural pathways necessary for singing in males. The Journal of comparative neurology, 527(4), 843-855. https://doi.org/10.1002/cne.24569 Sex: Males Age: Adult Method: DiO, DiI or rhodamine-conjugated dextran,
HVC	AIV	Zebra Finch	**Zebra Finch** *Taeniopygia guttata* Foster, E. F., & Bottjer, S. W. (1998). Axonal connections of the high vocal center and surrounding cortical regions in juvenile and adult male zebra finches. The Journal of comparative neurology, 397(1), 118-138. https://doi.org/10.1002/(SICI)1096-9861(19980720)397:1<118::AID-CNE9>3.0.CO;2-3 Sex: Males Age: Adults and Juvenlies (20-30 pdh) Method: rhodamine …
HVC	TnA	Non-Zebra Finch	**European Starling** *Sturnus vulgaris* Cheng, M., Chaiken, M., Zuo, M., & Miller, H. (1999). Nucleus taenia of the amygdala of birds: anatomical and functional studies in ring doves (Streptopelia risoria) and European Starlings (Sturnus vulgaris). Brain, behavior and evolution, 53(5-6), 243-270. https://doi.org/10.1159/000006597 Sex: Males Age: Adult (>P450) Method: FluoroGold
HVC	NIf	Zebra Finch	**Zebra Finch** *Taeniopygia guttata* Roberts, T. F., Hisey, E., Tanaka, M., Kearney, M. G., Chattree, G., Yang, C. F., Shah, N. M., & Mooney, R. (2017). Identification of a motor-to-auditory pathway important for vocal learning. Nature neuroscience, 20(7), 978-986. https://doi.org/10.1038/nn.4563 Sex: Males Age: Juvenile and young adult (60-140 dph) Method: 10kDa fluor dextrans
HVC	Area X	Zebra Finch|Non-Zebra Finch	**Zebra Finch** *Taeniopygia guttata* Bottjer, S. W., Halsema, K. A., Brown, S. A., & Miesner, E. A. (1989). Axonal connections of a forebrain nucleus involved with vocal learning in zebra finches. The Journal of comparative neurology, 279(2), 312-326. https://doi.org/10.1002/cne.902790211 Sex: Males Age: Adult (>P90) Method: WGA-HRP --- **Zebra Finch** *Taeniopygia guttata* Castelino, C. B., Die…
HVC	RA Cup	Zebra Finch	**Zebra Finch** *Taeniopygia guttata* Foster, E. F., & Bottjer, S. W. (1998). Axonal connections of the high vocal center and surrounding cortical regions in juvenile and adult male zebra finches. The Journal of comparative neurology, 397(1), 118-138. https://doi.org/10.1002/(SICI)1096-9861(19980720)397:1<118::AID-CNE9>3.0.CO;2-3 Sex: Males Age: Adults and Juvenlies (20-30 pdh) Method: rhodamine …
HVC	paraHVC	Zebra Finch	**Zebra Finch** *Taeniopygia guttata* Foster, E. F., & Bottjer, S. W. (1998). Axonal connections of the high vocal center and surrounding cortical regions in juvenile and adult male zebra finches. The Journal of comparative neurology, 397(1), 118-138. https://doi.org/10.1002/(SICI)1096-9861(19980720)397:1<118::AID-CNE9>3.0.CO;2-3 Sex: Males Age: Adults and Juvenlies (20-30 pdh) Method: rhodamine …
HVC	NCL	Zebra Finch	**Zebra Finch** *Taeniopygia guttata* Fortune, E. S., & Margoliash, D. (1995). Parallel pathways and convergence onto HVc and adjacent neostriatum of adult zebra finches *Taeniopygia guttata). The Journal of comparative neurology, 360(3), 413-441. https://doi.org/10.1002/cne.903600305 Sex: Undetermined Age: Adult Method: BDA or fluor dextrans
HVC Shelf	NCL	Zebra Finch|Non-Zebra Finch	**Zebra Finch** *Taeniopygia guttata* Mello, C. V., Vates, G. E., Okuhata, S., & Nottebohm, F. (1998). Descending auditory pathways in the adult male zebra finch *Taeniopygia guttata*. The Journal of comparative neurology, 395(2), 137-160. https://doi.org/10.1002/(SICI)1096-9861(19980601)395:2<137::AID-CNE1>3.0.CO;2-3 Sex: Males Age: Adult (>P120) Method: rhodamine beads --- **Carrion Crow** *Cor…
HVC Shelf	Area X	Zebra Finch	**Zebra Finch** *Taeniopygia guttata* Fortune, E. S., & Margoliash, D. (1995). Parallel pathways and convergence onto HVc and adjacent neostriatum of adult zebra finches (Taeniopygia guttata). The Journal of comparative neurology, 360(3), 413-441. https://doi.org/10.1002/cne.903600305 Sex: Undetermined Age: Adult Method: BDA or fluor dextrans
HVC Shelf	CLM	Zebra Finch	**Zebra Finch** *Taeniopygia guttata* Mello, C. V., Vates, G. E., Okuhata, S., & Nottebohm, F. (1998). Descending auditory pathways in the adult male zebra finch *Taeniopygia guttata*. The Journal of comparative neurology, 395(2), 137-160. https://doi.org/10.1002/(SICI)1096-9861(19980601)395:2<137::AID-CNE1>3.0.CO;2-3 Sex: Males Age: Adult (>P120) Method: rhodamine beads
HVC Shelf	AIV	Zebra Finch	**Zebra Finch** *Taeniopygia guttata* Mandelblat-Cerf, Y., Las, L., Denisenko, N., & Fee, M. S. (2014). A role for descending auditory cortical projections in songbird vocal learning. eLife, 3, e02152. https://doi.org/10.7554/eLife.02152 Sex: Males Age: Adult Method: retrograde tracer CTB; anterograde tracer GFP --- **Zebra Finch** *Taeniopygia guttata* Mello, C. V., Vates, G. E., Okuhata, S., & …
HVC Shelf	HVC	Zebra Finch	**Zebra Finch** *Taeniopygia guttata* Mello, C. V., Vates, G. E., Okuhata, S., & Nottebohm, F. (1998). Descending auditory pathways in the adult male zebra finch *Taeniopygia guttata*. The Journal of comparative neurology, 395(2), 137-160. https://doi.org/10.1002/(SICI)1096-9861(19980601)395:2<137::AID-CNE1>3.0.CO;2-3 Sex: Males Age: Adult (>P120) Method: Biocytin Laterality: Bilateral Injections…
HVC Shelf	RA Cup	Zebra Finch	**Zebra Finch** *Taeniopygia guttata* Mello, C. V., Vates, G. E., Okuhata, S., & Nottebohm, F. (1998). Descending auditory pathways in the adult male zebra finch *Taeniopygia guttata*. The Journal of comparative neurology, 395(2), 137-160. https://doi.org/10.1002/(SICI)1096-9861(19980601)395:2<137::AID-CNE1>3.0.CO;2-3 Sex: Males Age: Adult (>P120) Method: Biocytin Laterality: Bilateral Injections…
HVC Shelf	HA (Rostral)	Zebra Finch|Non-Zebra Finch	**Zebra Finch** *Taeniopygia guttata* Wild, J. M., & Williams, M. N. (1999). Rostral wulst of passerine birds: II. Intratelencephalic projections to nuclei associated with the auditory and song systems. The Journal of comparative neurology, 413(4), 520-534. https://doi.org/10.1002/(sici)1096-9861(19991101)413:4<520::aid-cne3>3.0.co;2-b Sex: Undetermined Age: Not Reported Method: BDA, CTB --- **Gr…
ICo	DM	Zebra Finch	**Zebra Finch** *Taeniopygia guttata* Striedter, G. F., & Vu, E. T. (1998). Bilateral feedback projections to the forebrain in the premotor network for singing in zebra finches. Journal of neurobiology, 34(1), 27-40. https://doi.org/10.1002/(SICI)1097-4695(199801)34:1%3C27::AID-NEU3%3E3.0.CO;2-E Sex: Males Age: Adult Method: BDA, dextran, fluorogold --- **Zebra Finch** *Taeniopygia guttata* Wild,…
ICo	Ov (Shell)	Zebra Finch|Non-Zebra Finch	**Zebra Finch** *Taeniopygia guttata* Wild, J. M., & Williams, M. N. (2000). Rostral wulst in passerine birds. I. Origin, course, and terminations of an avian pyramidal tract. The Journal of comparative neurology, 416(4), 429-450. https://doi.org/10.1002/(SICI)1096-9861(20000124)416:4<429::AID-CNE2>3.0.CO;2-X Sex: Not Reported Age: Not Reported Method: BDA (10kDa) or CTB --- **Bengalese Finch** *…
ICo	VMH	Zebra Finch	**Zebra Finch** *Taeniopygia guttata* Wild J. M. (2017). The ventromedial hypothalamic nucleus in the zebra finch (Taeniopygia guttata): Afferent and efferent projections in relation to the control of reproductive behavior. The Journal of comparative neurology, 525(12), 2657-2676. https://doi.org/10.1002/cne.24225 Sex: Males and Females Age: Adult Method: CTB Laterality: ipsilateral
ICo	CG	Zebra Finch	**Zebra Finch** *Taeniopygia guttata* Ben-Tov, M., Duarte, F., & Mooney, R. (2023). A neural hub for holistic courtship displays. Current biology : CB, 33(9), 1640-1653.e5. https://doi.org/10.1016/j.cub.2023.02.072 Sex: Males Age: Adult Method: Retrobeads
ICo	RVL	Zebra Finch	**Zebra Finch** *Taeniopygia guttata* Striedter, G. F., & Vu, E. T. (1998). Bilateral feedback projections to the forebrain in the premotor network for singing in zebra finches. Journal of neurobiology, 34(1), 27-40. https://doi.org/10.1002/(SICI)1097-4695(199801)34:1%3C27::AID-NEU3%3E3.0.CO;2-E Sex: Males Age: Adult Method: BDA
ICo	Uva	Zebra Finch	**Zebra Finch** *Taeniopygia guttata* Wild, J. M., & Gaede, A. H. (2016). Second tectofugal pathway in a songbird *Taeniopygia guttata) revisited: Tectal and lateral pontine projections to the posterior thalamus, thence to the intermediate nidopallium. The Journal of comparative neurology, 524(5), 963-985. https://doi.org/10.1002/cne.23886 Sex: Undetermined Age: Adult (>P100) Method: CTB
IHA	MSt	Zebra Finch	**Zebra Finch** *Taeniopygia guttata* Wild, J. M., & Williams, M. N. (1999). Rostral wulst of passerine birds: II. Intratelencephalic projections to nuclei associated with the auditory and song systems. The Journal of comparative neurology, 413(4), 520-534. https://doi.org/10.1002/(sici)1096-9861(19991101)413:4<520::aid-cne3>3.0.co;2-b Sex: Undetermined Age: Not Reported Method: BDA, CTB
IHA	PM	Zebra Finch	**Zebra Finch** *Taeniopygia guttata* Gaede, A. H., Gutiérrez-Ibáñez, C., Wu, P. H., Pilon, M. C., Altshuler, D. L., & Wylie, D. R. (2024). Topography of visual and somatosensory inputs to the pontine nuclei in zebra finches *Taeniopygia guttata). The Journal of comparative neurology, 532(2), e25556. https://doi.org/10.1002/cne.25556 Sex: Males Age: Adult Method: anterograde tracing Texas red and…
IHA	HA (Rostral)	Zebra Finch	**Zebra Finch** *Taeniopygia guttata* Wild, J. M., & Williams, M. N. (1999). Rostral wulst of passerine birds: II. Intratelencephalic projections to nuclei associated with the auditory and song systems. The Journal of comparative neurology, 413(4), 520-534. https://doi.org/10.1002/(sici)1096-9861(19991101)413:4<520::aid-cne3>3.0.co;2-b Sex: Undetermined Age: Not Reported Method: BDA, CTB
IHA	Area X	Zebra Finch	**Zebra Finch** *Taeniopygia guttata* Wild, J. M., & Williams, M. N. (1999). Rostral wulst of passerine birds: II. Intratelencephalic projections to nuclei associated with the auditory and song systems. The Journal of comparative neurology, 413(4), 520-534. https://doi.org/10.1002/(sici)1096-9861(19991101)413:4<520::aid-cne3>3.0.co;2-b Sex: Undetermined Age: Not Reported Method: BDA
ILM	NCL	Zebra Finch|Non-Zebra Finch	**Zebra Finch** *Taeniopygia guttata* Sadananda, M., Korte, S., & Bischof, H. J. (2007). Afferentation of a caudal forebrain area activated during courtship behavior: a tracing study in the zebra finch (Taeniopygia guttata). Brain research, 1184, 108-120. https://doi.org/10.1016/j.brainres.2007.09.040 Sex: Males Age: Adult Method: Rhodamine B-Isothiocyanate and Diamidino Yellow (Dihydrochloride);…
ILM	Bas	Zebra Finch	**Zebra Finch** *Taeniopygia guttata* Wild, J. M., & Farabaugh, S. M. (1996). Organization of afferent and efferent projections of the nucleus basalis prosencephali in a passerine, Taeniopygia guttata. The Journal of comparative neurology, 365(2), 306-328. https://doi.org/10.1002/(SICI)1096-9861(19960205)365:2<306::AID-CNE8>3.0.CO;2-9 Sex: Males Age: Adult Method: BDA
ILM	NIL	Zebra Finch	**Zebra Finch** *Taeniopygia guttata* Sadananda, M., & Bischof, H. J. (2006). Afferentation of the lateral nidopallium: A tracing study of a brain area involved in sexual imprinting in the zebra finch *Taeniopygia guttata). Brain research, 1106(1), 111-122. https://doi.org/10.1016/j.brainres.2006.04.009 Sex: Undetermined Age: Adult Method: BDA --- **Zebra Finch** *Taeniopygia guttata* Wild, J. M.…
ILM	NFL	Zebra Finch	**Zebra Finch** *Taeniopygia guttata* Sadananda, M., & Bischof, H. J. (2006). Afferentation of the lateral nidopallium: A tracing study of a brain area involved in sexual imprinting in the zebra finch *Taeniopygia guttata). Brain research, 1106(1), 111-122. https://doi.org/10.1016/j.brainres.2006.04.009 Sex: Undetermined Age: Adult Method: BDA --- **Zebra Finch** *Taeniopygia guttata* Wild, J. M.…
ILM	Area X	Zebra Finch	**Zebra Finch** *Taeniopygia guttata* Castelino, C. B., Diekamp, B., & Ball, G. F. (2007). Noradrenergic projections to the song control nucleus area X of the medial striatum in male zebra finches (Taeniopygia guttata). The Journal of comparative neurology, 502(4), 544-562. https://doi.org/10.1002/cne.21337 Sex: Males Age: Adult Method: retrograde tracer CTB, anterograde tracer BDA
ILM	AI	Zebra Finch	**Zebra Finch** *Taeniopygia guttata* Sadananda, M., Korte, S., & Bischof, H. J. (2007). Afferentation of a caudal forebrain area activated during courtship behavior: a tracing study in the zebra finch *Taeniopygia guttata). Brain research, 1184, 108-120. https://doi.org/10.1016/j.brainres.2007.09.040 Sex: Males Age: Adult Method: Rhodamine B-Isothiocyanate and Diamidino Yellow (Dihydrochloride);…
Imc	Ipc	Zebra Finch	**Zebra Finch** *Taeniopygia guttata* Faunes, M., Fernández, S., Gutiérrez-Ibáñez, C., Iwaniuk, A. N., Wylie, D. R., Mpodozis, J., Karten, H. J., & Marín, G. (2013). Laminar segregation of GABAergic neurons in the avian nucleus isthmi pars magnocellularis: a retrograde tracer and comparative study. The Journal of comparative neurology, 521(8), 1727-1742. https://doi.org/10.1002/cne.23253 Sex: Mal…
Imc	OT	Zebra Finch	**Zebra Finch** *Taeniopygia guttata* Faunes, M., Fernández, S., Gutiérrez-Ibáñez, C., Iwaniuk, A. N., Wylie, D. R., Mpodozis, J., Karten, H. J., & Marín, G. (2013). Laminar segregation of GABAergic neurons in the avian nucleus isthmi pars magnocellularis: a retrograde tracer and comparative study. The Journal of comparative neurology, 521(8), 1727-1742. https://doi.org/10.1002/cne.23253 Sex: Mal…
IMM	NCL	Zebra Finch|Non-Zebra Finch	**Zebra Finch** *Taeniopygia guttata* Sadananda, M., Korte, S., & Bischof, H. J. (2007). Afferentation of a caudal forebrain area activated during courtship behavior: a tracing study in the zebra finch *Taeniopygia guttata). Brain research, 1184, 108-120. https://doi.org/10.1016/j.brainres.2007.09.040 Sex: Males Age: Adult Method: Rhodamine B-Isothiocyanate and Diamidino Yellow (Dihydrochloride);…
IMM	NIL	Zebra Finch	**Zebra Finch** *Taeniopygia guttata* Sadananda, M., & Bischof, H. J. (2006). Afferentation of the lateral nidopallium: A tracing study of a brain area involved in sexual imprinting in the zebra finch *Taeniopygia guttata). Brain research, 1106(1), 111-122. https://doi.org/10.1016/j.brainres.2006.04.009 Sex: Undetermined Age: Adult Method: RITC --- **Zebra Finch** *Taeniopygia guttata* Székely, A…
IMM	HA (Caudal)	Zebra Finch	**Zebra Finch** *Taeniopygia guttata* Székely, A. D., & Krebs, J. R. (1996). Efferent connectivity of the hippocampal formation of the zebra finch *Taenopygia guttata): an anterograde pathway tracing study using Phaseolus vulgaris leucoagglutinin. The Journal of comparative neurology, 368(2), 198-214. https://doi.org/10.1002/(SICI)1096-9861(19960429)368:2<198::AID-CNE3>3.0.CO;2-Z Sex: Undetermine…
IMM	AI	Zebra Finch	**Zebra Finch** *Taeniopygia guttata* Sadananda, M., Korte, S., & Bischof, H. J. (2007). Afferentation of a caudal forebrain area activated during courtship behavior: a tracing study in the zebra finch *Taeniopygia guttata). Brain research, 1184, 108-120. https://doi.org/10.1016/j.brainres.2007.09.040 Sex: Males Age: Adult Method: Rhodamine B-Isothiocyanate and Diamidino Yellow (Dihydrochloride);…
IMM	HI	Zebra Finch	**Zebra Finch** *Taeniopygia guttata* Székely, A. D., & Krebs, J. R. (1996). Efferent connectivity of the hippocampal formation of the zebra finch *Taenopygia guttata): an anterograde pathway tracing study using Phaseolus vulgaris leucoagglutinin. The Journal of comparative neurology, 368(2), 198-214. https://doi.org/10.1002/(SICI)1096-9861(19960429)368:2<198::AID-CNE3>3.0.CO;2-Z Sex: Undetermine…
IMM	HD	Zebra Finch	**Zebra Finch** *Taeniopygia guttata* Székely, A. D., & Krebs, J. R. (1996). Efferent connectivity of the hippocampal formation of the zebra finch *Taenopygia guttata): an anterograde pathway tracing study using Phaseolus vulgaris leucoagglutinin. The Journal of comparative neurology, 368(2), 198-214. https://doi.org/10.1002/(SICI)1096-9861(19960429)368:2<198::AID-CNE3>3.0.CO;2-Z Sex: Undetermine…
IMM	LSt	Zebra Finch	**Zebra Finch** *Taeniopygia guttata* Székely, A. D., & Krebs, J. R. (1996). Efferent connectivity of the hippocampal formation of the zebra finch *Taenopygia guttata): an anterograde pathway tracing study using Phaseolus vulgaris leucoagglutinin. The Journal of comparative neurology, 368(2), 198-214. https://doi.org/10.1002/(SICI)1096-9861(19960429)368:2<198::AID-CNE3>3.0.CO;2-Z Sex: Undetermine…
IMM	Area X	Zebra Finch	**Zebra Finch** *Taeniopygia guttata* Castelino, C. B., Diekamp, B., & Ball, G. F. (2007). Noradrenergic projections to the song control nucleus area X of the medial striatum in male zebra finches (Taeniopygia guttata). The Journal of comparative neurology, 502(4), 544-562. https://doi.org/10.1002/cne.21337 Sex: Males Age: Adult Method: retrograde tracer CTB, anterograde tracer BDA
IMM	NIM	Zebra Finch	**Zebra Finch** *Taeniopygia guttata* Székely, A. D., & Krebs, J. R. (1996). Efferent connectivity of the hippocampal formation of the zebra finch *Taenopygia guttata): an anterograde pathway tracing study using Phaseolus vulgaris leucoagglutinin. The Journal of comparative neurology, 368(2), 198-214. https://doi.org/10.1002/(SICI)1096-9861(19960429)368:2<198::AID-CNE3>3.0.CO;2-Z Sex: Undetermine…
IMM	ILM	Zebra Finch	**Zebra Finch** *Taeniopygia guttata* Székely, A. D., & Krebs, J. R. (1996). Efferent connectivity of the hippocampal formation of the zebra finch *Taenopygia guttata): an anterograde pathway tracing study using Phaseolus vulgaris leucoagglutinin. The Journal of comparative neurology, 368(2), 198-214. https://doi.org/10.1002/(SICI)1096-9861(19960429)368:2<198::AID-CNE3>3.0.CO;2-Z Sex: Undetermine…
IMM	AM	Zebra Finch	**Zebra Finch** *Taeniopygia guttata* Székely, A. D., & Krebs, J. R. (1996). Efferent connectivity of the hippocampal formation of the zebra finch *Taenopygia guttata): an anterograde pathway tracing study using Phaseolus vulgaris leucoagglutinin. The Journal of comparative neurology, 368(2), 198-214. https://doi.org/10.1002/(SICI)1096-9861(19960429)368:2<198::AID-CNE3>3.0.CO;2-Z Sex: Undetermine…
IO	OCb	Zebra Finch	**Zebra Finch** *Taeniopygia guttata* Wylie, D. R., Gaede, A. H., Gutiérrez-Ibáñez, C., Wu, P. H., Pilon, M. C., Azargoon, S., & Altshuler, D. L. (2023). Topography of optic flow processing in olivo-cerebellar pathways in zebra finches *Taeniopygia guttata). The Journal of comparative neurology, 531(6), 640-662. https://doi.org/10.1002/cne.25454 Sex: Males Age: Adult Method: CTB
IO	PAm	Zebra Finch	**Zebra Finch** *Taeniopygia guttata* Reinke, H. and Wild, J.M. (1998), Identification and connections of inspiratory premotor neurons in songbirds and budgerigar. J. Comp. Neurol., 391: 147-163. https://doi.org/10.1002/(SICI)1096-9861(19980209)391:2<147::AID-CNE1>3.0.CO;2-2 Sex: Male Age: Not Reported Method: BDA (10kDa)
IO	VbC	Zebra Finch	**Zebra Finch** *Taeniopygia guttata* Wylie, D. R., Gaede, A. H., Gutiérrez-Ibáñez, C., Wu, P. H., Pilon, M. C., Azargoon, S., & Altshuler, D. L. (2023). Topography of optic flow processing in olivo-cerebellar pathways in zebra finches (Taeniopygia guttata). The Journal of comparative neurology, 531(6), 640-662. https://doi.org/10.1002/cne.25454 Sex: Males Age: Adult Method: CTB
ION	Retina RGCs	Non-Zebra Finch	**Hawfinch** *Coccothraustes coccothraustes* Feyerabend, B., Malz, C. R., & Meyer, D. L. (1994). Birds that feed-on-the-wing have few isthmo-optic neurons. Neuroscience letters, 182(1), 66-68. https://doi.org/10.1016/0304-3940(94)90207-0 Sex: Not Reported Age: Not Reported Method: HRP
ION	Retina DGCs	Non-Zebra Finch	**Hawfinch** *Coccothraustes coccothraustes* Feyerabend, B., Malz, C. R., & Meyer, D. L. (1994). Birds that feed-on-the-wing have few isthmo-optic neurons. Neuroscience letters, 182(1), 66-68. https://doi.org/10.1016/0304-3940(94)90207-0 Sex: Not Reported Age: Not Reported Method: HRP
IOS	RAm	Zebra Finch	**Zebra Finch** *Taeniopygia guttata* Reinke, H. and Wild, J.M. (1998), Identification and connections of inspiratory premotor neurons in songbirds and budgerigar. J. Comp. Neurol., 391: 147-163. https://doi.org/10.1002/(SICI)1096-9861(19980209)391:2<147::AID-CNE1>3.0.CO;2-2 Sex: Not Reported Age: Not Reported Method: BDA and CTB --- **Zebra Finch** *Taeniopygia guttata* Wild, J. M., Kubke, M. F.…
IOS	PAm	Zebra Finch	**Zebra Finch** *Taeniopygia guttata* Reinke, H. and Wild, J.M. (1998), Identification and connections of inspiratory premotor neurons in songbirds and budgerigar. J. Comp. Neurol., 391: 147-163. https://doi.org/10.1002/(SICI)1096-9861(19980209)391:2<147::AID-CNE1>3.0.CO;2-2 Sex: Not Reported Age: Not Reported Method: BDA and CTB --- **Zebra Finch** *Taeniopygia guttata* Wild, J. M., Kubke, M. F.…
Ipc	Slu	Zebra Finch	**Zebra Finch** *Taeniopygia guttata* Faunes, M., Fernández, S., Gutiérrez-Ibáñez, C., Iwaniuk, A. N., Wylie, D. R., Mpodozis, J., Karten, H. J., & Marín, G. (2013). Laminar segregation of GABAergic neurons in the avian nucleus isthmi pars magnocellularis: a retrograde tracer and comparative study. The Journal of comparative neurology, 521(8), 1727-1742. https://doi.org/10.1002/cne.23253 Sex: Mal…
Ipc	OT	Zebra Finch	**Zebra Finch** *Taeniopygia guttata* Faunes, M., Fernández, S., Gutiérrez-Ibáñez, C., Iwaniuk, A. N., Wylie, D. R., Mpodozis, J., Karten, H. J., & Marín, G. (2013). Laminar segregation of GABAergic neurons in the avian nucleus isthmi pars magnocellularis: a retrograde tracer and comparative study. The Journal of comparative neurology, 521(8), 1727-1742. https://doi.org/10.1002/cne.23253 Sex: Mal…
Ipc	Imc	Zebra Finch	**Zebra Finch** *Taeniopygia guttata* Faunes, M., Fernández, S., Gutiérrez-Ibáñez, C., Iwaniuk, A. N., Wylie, D. R., Mpodozis, J., Karten, H. J., & Marín, G. (2013). Laminar segregation of GABAergic neurons in the avian nucleus isthmi pars magnocellularis: a retrograde tracer and comparative study. The Journal of comparative neurology, 521(8), 1727-1742. https://doi.org/10.1002/cne.23253 Sex: Mal…
IPS	Rt	Zebra Finch	**Zebra Finch** *Taeniopygia guttata* Bischof, HJ., Niemann, J. (1990). Contralateral projections of the optic tectum in the zebra finch *Taenopygia guttata castanotis). Cell and Tissue Research, 262, 307-313. https://doi.org/10.1007/BF00309886 Sex: Males Age: Adult Method: RITC, HRP
IPS	E	Zebra Finch	**Zebra Finch** *Taeniopygia guttata* Nixdorf, B. E., & Bischof, H. J. (1982). Afferent connections of the ectostriatum and visual wulst in the zebra finch *Taeniopygia guttata castanotis Gould)--an HRP study. Brain research, 248(1), 9-17. https://doi.org/10.1016/0006-8993(82)91142-8 Sex: Males Age: Adult Method: HRP
L1	AIV	Zebra Finch	**Zebra Finch** *Taeniopygia guttata* Mandelblat-Cerf, Y., Las, L., Denisenko, N., & Fee, M. S. (2014). A role for descending auditory cortical projections in songbird vocal learning. eLife, 3, e02152. https://doi.org/10.7554/eLife.02152 Sex: Males Age: Adult Method: retrograde tracer CTB; anterograde tracer GFP
L1	HVC	Zebra Finch	**Zebra Finch** *Taeniopygia guttata* Fortune, E. S., & Margoliash, D. (1995). Parallel pathways and convergence onto HVc and adjacent neostriatum of adult zebra finches *Taeniopygia guttata). The Journal of comparative neurology, 360(3), 413-441. https://doi.org/10.1002/cne.903600305 Sex: Undetermined Age: Adult Method: BDA or fluor dextrans --- **Zebra Finch** *Taeniopygia guttata* Vates, G. E.…
L1	NCL	Zebra Finch	**Zebra Finch** *Taeniopygia guttata* Fortune, E. S., & Margoliash, D. (1995). Parallel pathways and convergence onto HVc and adjacent neostriatum of adult zebra finches *Taeniopygia guttata). The Journal of comparative neurology, 360(3), 413-441. https://doi.org/10.1002/cne.903600305 Sex: Undetermined Age: Adult Method: BDA or fluor dextrans --- **Zebra Finch** *Taeniopygia guttata* Vates, G. E.…
L1	HA (Rostral)	Zebra Finch	**Zebra Finch** *Taeniopygia guttata* Wild, J. M., & Williams, M. N. (1999). Rostral wulst of passerine birds: II. Intratelencephalic projections to nuclei associated with the auditory and song systems. The Journal of comparative neurology, 413(4), 520-534. https://doi.org/10.1002/(sici)1096-9861(19991101)413:4<520::aid-cne3>3.0.co;2-b Sex: Undetermined Age: Not Reported Method: BDA, CTB
L1	NCM	Zebra Finch	**Zebra Finch** *Taeniopygia guttata* Vates, G. E., Broome, B. M., Mello, C. V., & Nottebohm, F. (1996). Auditory pathways of caudal telencephalon and their relation to the song system of adult male zebra finches. The Journal of comparative neurology, 366(4), 613-642. https://doi.org/10.1002/(SICI)1096-9861(19960318)366:4<613::AID-CNE5>3.0.CO;2-7 Sex: Males Age: Adult (>P120) Method: BDA (3kDa) o…
L1	L3	Zebra Finch	**Zebra Finch** *Taeniopygia guttata* Vates, G. E., Broome, B. M., Mello, C. V., & Nottebohm, F. (1996). Auditory pathways of caudal telencephalon and their relation to the song system of adult male zebra finches. The Journal of comparative neurology, 366(4), 613-642. https://doi.org/10.1002/(SICI)1096-9861(19960318)366:4<613::AID-CNE5>3.0.CO;2-7 Sex: Males Age: Adult (>P120) Method: BDA (3kDa) o…
L1	HVC Shelf	Zebra Finch	**Zebra Finch** *Taeniopygia guttata* Vates, G. E., Broome, B. M., Mello, C. V., & Nottebohm, F. (1996). Auditory pathways of caudal telencephalon and their relation to the song system of adult male zebra finches. The Journal of comparative neurology, 366(4), 613-642. https://doi.org/10.1002/(SICI)1096-9861(19960318)366:4<613::AID-CNE5>3.0.CO;2-7 Sex: Males Age: Adult (>P120) Method: BDA (3kDa) o…
L1	RA Cup	Zebra Finch	**Zebra Finch** *Taeniopygia guttata* Vates, G. E., Broome, B. M., Mello, C. V., & Nottebohm, F. (1996). Auditory pathways of caudal telencephalon and their relation to the song system of adult male zebra finches. The Journal of comparative neurology, 366(4), 613-642. https://doi.org/10.1002/(SICI)1096-9861(19960318)366:4<613::AID-CNE5>3.0.CO;2-7 Sex: Males Age: Adult (>P120) Method: BDA (3kDa) o…
L1	Ov (Shell)	Zebra Finch	**Zebra Finch** *Taeniopygia guttata* Vates, G. E., Broome, B. M., Mello, C. V., & Nottebohm, F. (1996). Auditory pathways of caudal telencephalon and their relation to the song system of adult male zebra finches. The Journal of comparative neurology, 366(4), 613-642. https://doi.org/10.1002/(SICI)1096-9861(19960318)366:4<613::AID-CNE5>3.0.CO;2-7 Sex: Males Age: Adult (>P120) Method: BDA (3kDa) o…
L1	IHA	Zebra Finch	**Zebra Finch** *Taeniopygia guttata* Wild, J. M., & Williams, M. N. (1999). Rostral wulst of passerine birds: II. Intratelencephalic projections to nuclei associated with the auditory and song systems. The Journal of comparative neurology, 413(4), 520-534. https://doi.org/10.1002/(sici)1096-9861(19991101)413:4<520::aid-cne3>3.0.co;2-b Sex: Undetermined Age: Not Reported Method: BDA
L1	CSt	Zebra Finch	**Zebra Finch** *Taeniopygia guttata* Vates, G. E., Broome, B. M., Mello, C. V., & Nottebohm, F. (1996). Auditory pathways of caudal telencephalon and their relation to the song system of adult male zebra finches. The Journal of comparative neurology, 366(4), 613-642. https://doi.org/10.1002/(SICI)1096-9861(19960318)366:4<613::AID-CNE5>3.0.CO;2-7 Sex: Males Age: Adult (>P120) Method: BDA (3kDa) o…
L1	nTOv	Zebra Finch	**Zebra Finch** *Taeniopygia guttata* Vates, G. E., Broome, B. M., Mello, C. V., & Nottebohm, F. (1996). Auditory pathways of caudal telencephalon and their relation to the song system of adult male zebra finches. The Journal of comparative neurology, 366(4), 613-642. https://doi.org/10.1002/(SICI)1096-9861(19960318)366:4<613::AID-CNE5>3.0.CO;2-7 Sex: Males Age: Adult (>P120) Method: BDA (3kDa) o…
L1	L2a	Zebra Finch	**Zebra Finch** *Taeniopygia guttata* Vates, G. E., Broome, B. M., Mello, C. V., & Nottebohm, F. (1996). Auditory pathways of caudal telencephalon and their relation to the song system of adult male zebra finches. The Journal of comparative neurology, 366(4), 613-642. https://doi.org/10.1002/(SICI)1096-9861(19960318)366:4<613::AID-CNE5>3.0.CO;2-7 Sex: Males Age: Adult (>P120) Method: BDA (3kDa) o…
L1	CLM	Zebra Finch	**Zebra Finch** *Taeniopygia guttata* Fortune, E. S., & Margoliash, D. (1995). Parallel pathways and convergence onto HVc and adjacent neostriatum of adult zebra finches *Taeniopygia guttata). The Journal of comparative neurology, 360(3), 413-441. https://doi.org/10.1002/cne.903600305 Sex: Undetermined Age: Adult Method: BDA or fluor dextrans --- **Zebra Finch** *Taeniopygia guttata* Vates, G. E.…
L2a	NCM	Zebra Finch	**Zebra Finch** *Taeniopygia guttata* Vates, G. E., Broome, B. M., Mello, C. V., & Nottebohm, F. (1996). Auditory pathways of caudal telencephalon and their relation to the song system of adult male zebra finches. The Journal of comparative neurology, 366(4), 613-642. https://doi.org/10.1002/(SICI)1096-9861(19960318)366:4<613::AID-CNE5>3.0.CO;2-7 Sex: Males Age: Adult (>P120) Method: BDA (3kDa) o…
L2a	L2b	Zebra Finch	**Zebra Finch** *Taeniopygia guttata* Vates, G. E., Broome, B. M., Mello, C. V., & Nottebohm, F. (1996). Auditory pathways of caudal telencephalon and their relation to the song system of adult male zebra finches. The Journal of comparative neurology, 366(4), 613-642. https://doi.org/10.1002/(SICI)1096-9861(19960318)366:4<613::AID-CNE5>3.0.CO;2-7 Sex: Males Age: Adult (>P120) Method: BDA (3kDa) o…
L2a	L1	Zebra Finch	**Zebra Finch** *Taeniopygia guttata* Vates, G. E., Broome, B. M., Mello, C. V., & Nottebohm, F. (1996). Auditory pathways of caudal telencephalon and their relation to the song system of adult male zebra finches. The Journal of comparative neurology, 366(4), 613-642. https://doi.org/10.1002/(SICI)1096-9861(19960318)366:4<613::AID-CNE5>3.0.CO;2-7 Sex: Males Age: Adult (>P120) Method: BDA (3kDa) o…
L2a	CLM	Zebra Finch	**Zebra Finch** *Taeniopygia guttata* Vates, G. E., Broome, B. M., Mello, C. V., & Nottebohm, F. (1996). Auditory pathways of caudal telencephalon and their relation to the song system of adult male zebra finches. The Journal of comparative neurology, 366(4), 613-642. https://doi.org/10.1002/(SICI)1096-9861(19960318)366:4<613::AID-CNE5>3.0.CO;2-7 Sex: Males Age: Adult (>P120) Method: BDA (3kDa) o…
L2a	HVC	Zebra Finch	**Zebra Finch** *Taeniopygia guttata* Fortune, E. S., & Margoliash, D. (1995). Parallel pathways and convergence onto HVc and adjacent neostriatum of adult zebra finches *Taeniopygia guttata). The Journal of comparative neurology, 360(3), 413-441. https://doi.org/10.1002/cne.903600305 Sex: Undetermined Age: Adult Method: BDA or fluor dextrans
L2a	L3	Zebra Finch	**Zebra Finch** *Taeniopygia guttata* Vates, G. E., Broome, B. M., Mello, C. V., & Nottebohm, F. (1996). Auditory pathways of caudal telencephalon and their relation to the song system of adult male zebra finches. The Journal of comparative neurology, 366(4), 613-642. https://doi.org/10.1002/(SICI)1096-9861(19960318)366:4<613::AID-CNE5>3.0.CO;2-7 Sex: Males Age: Adult (>P120) Method: BDA (3kDa) o…
L2b	L2a	Zebra Finch	**Zebra Finch** *Taeniopygia guttata* Vates, G. E., Broome, B. M., Mello, C. V., & Nottebohm, F. (1996). Auditory pathways of caudal telencephalon and their relation to the song system of adult male zebra finches. The Journal of comparative neurology, 366(4), 613-642. https://doi.org/10.1002/(SICI)1096-9861(19960318)366:4<613::AID-CNE5>3.0.CO;2-7 Sex: Males Age: Adult (>P120) Method: BDA (3kDa) o…
L2b	L1	Zebra Finch	**Zebra Finch** *Taeniopygia guttata* Vates, G. E., Broome, B. M., Mello, C. V., & Nottebohm, F. (1996). Auditory pathways of caudal telencephalon and their relation to the song system of adult male zebra finches. The Journal of comparative neurology, 366(4), 613-642. https://doi.org/10.1002/(SICI)1096-9861(19960318)366:4<613::AID-CNE5>3.0.CO;2-7 Sex: Males Age: Adult (>P120) Method: BDA (3kDa) o…
L2b	L3	Zebra Finch	**Zebra Finch** *Taeniopygia guttata* Vates, G. E., Broome, B. M., Mello, C. V., & Nottebohm, F. (1996). Auditory pathways of caudal telencephalon and their relation to the song system of adult male zebra finches. The Journal of comparative neurology, 366(4), 613-642. https://doi.org/10.1002/(SICI)1096-9861(19960318)366:4<613::AID-CNE5>3.0.CO;2-7 Sex: Males Age: Adult (>P120) Method: BDA (3kDa) o…
L2b	CLM	Zebra Finch	**Zebra Finch** *Taeniopygia guttata* Vates, G. E., Broome, B. M., Mello, C. V., & Nottebohm, F. (1996). Auditory pathways of caudal telencephalon and their relation to the song system of adult male zebra finches. The Journal of comparative neurology, 366(4), 613-642. https://doi.org/10.1002/(SICI)1096-9861(19960318)366:4<613::AID-CNE5>3.0.CO;2-7 Sex: Males Age: Adult (>P120) Method: BDA (3kDa) o…
L2b	NCM	Zebra Finch	**Zebra Finch** *Taeniopygia guttata* Vates, G. E., Broome, B. M., Mello, C. V., & Nottebohm, F. (1996). Auditory pathways of caudal telencephalon and their relation to the song system of adult male zebra finches. The Journal of comparative neurology, 366(4), 613-642. https://doi.org/10.1002/(SICI)1096-9861(19960318)366:4<613::AID-CNE5>3.0.CO;2-7 Sex: Males Age: Adult (>P120) Method: BDA (3kDa) o…
L2b	CSt	Zebra Finch	**Zebra Finch** *Taeniopygia guttata* Vates, G. E., Broome, B. M., Mello, C. V., & Nottebohm, F. (1996). Auditory pathways of caudal telencephalon and their relation to the song system of adult male zebra finches. The Journal of comparative neurology, 366(4), 613-642. https://doi.org/10.1002/(SICI)1096-9861(19960318)366:4<613::AID-CNE5>3.0.CO;2-7 Sex: Males Age: Adult (>P120) Method: BDA (3kDa) o…
L3	HVC	Zebra Finch	**Zebra Finch** *Taeniopygia guttata* Fortune, E. S., & Margoliash, D. (1995). Parallel pathways and convergence onto HVc and adjacent neostriatum of adult zebra finches *Taeniopygia guttata). The Journal of comparative neurology, 360(3), 413-441. https://doi.org/10.1002/cne.903600305 Sex: Undetermined Age: Adult Method: BDA or fluor dextrans
L3	HVC Shelf	Zebra Finch	**Zebra Finch** *Taeniopygia guttata* Vates, G. E., Broome, B. M., Mello, C. V., & Nottebohm, F. (1996). Auditory pathways of caudal telencephalon and their relation to the song system of adult male zebra finches. The Journal of comparative neurology, 366(4), 613-642. https://doi.org/10.1002/(SICI)1096-9861(19960318)366:4<613::AID-CNE5>3.0.CO;2-7 Sex: Males Age: Adult (>P120) Method: BDA (3kDa) o…
L3	CSt	Zebra Finch	**Zebra Finch** *Taeniopygia guttata* Vates, G. E., Broome, B. M., Mello, C. V., & Nottebohm, F. (1996). Auditory pathways of caudal telencephalon and their relation to the song system of adult male zebra finches. The Journal of comparative neurology, 366(4), 613-642. https://doi.org/10.1002/(SICI)1096-9861(19960318)366:4<613::AID-CNE5>3.0.CO;2-7 Sex: Males Age: Adult (>P120) Method: BDA (3kDa) o…
L3	Ov (Shell)	Zebra Finch	**Zebra Finch** *Taeniopygia guttata* Vates, G. E., Broome, B. M., Mello, C. V., & Nottebohm, F. (1996). Auditory pathways of caudal telencephalon and their relation to the song system of adult male zebra finches. The Journal of comparative neurology, 366(4), 613-642. https://doi.org/10.1002/(SICI)1096-9861(19960318)366:4<613::AID-CNE5>3.0.CO;2-7 Sex: Males Age: Adult (>P120) Method: BDA (3kDa) o…
L3	L2b	Zebra Finch	**Zebra Finch** *Taeniopygia guttata* Vates, G. E., Broome, B. M., Mello, C. V., & Nottebohm, F. (1996). Auditory pathways of caudal telencephalon and their relation to the song system of adult male zebra finches. The Journal of comparative neurology, 366(4), 613-642. https://doi.org/10.1002/(SICI)1096-9861(19960318)366:4<613::AID-CNE5>3.0.CO;2-7 Sex: Males Age: Adult (>P120) Method: BDA (3kDa) o…
L3	NCM	Zebra Finch	**Zebra Finch** *Taeniopygia guttata* Vates, G. E., Broome, B. M., Mello, C. V., & Nottebohm, F. (1996). Auditory pathways of caudal telencephalon and their relation to the song system of adult male zebra finches. The Journal of comparative neurology, 366(4), 613-642. https://doi.org/10.1002/(SICI)1096-9861(19960318)366:4<613::AID-CNE5>3.0.CO;2-7 Sex: Males Age: Adult (>P120) Method: BDA (3kDa) o…
L3	CLM	Zebra Finch	**Zebra Finch** *Taeniopygia guttata* Fortune, E. S., & Margoliash, D. (1995). Parallel pathways and convergence onto HVc and adjacent neostriatum of adult zebra finches *Taeniopygia guttata). The Journal of comparative neurology, 360(3), 413-441. https://doi.org/10.1002/cne.903600305 Sex: Undetermined Age: Adult Method: BDA or fluor dextrans --- **Zebra Finch** *Taeniopygia guttata* Vates, G. E.…
L3	L1	Zebra Finch	**Zebra Finch** *Taeniopygia guttata* Vates, G. E., Broome, B. M., Mello, C. V., & Nottebohm, F. (1996). Auditory pathways of caudal telencephalon and their relation to the song system of adult male zebra finches. The Journal of comparative neurology, 366(4), 613-642. https://doi.org/10.1002/(SICI)1096-9861(19960318)366:4<613::AID-CNE5>3.0.CO;2-7 Sex: Males Age: Adult (>P120) Method: BDA (3kDa) o…
L3	NCL	Zebra Finch	**Zebra Finch** *Taeniopygia guttata* Fortune, E. S., & Margoliash, D. (1995). Parallel pathways and convergence onto HVc and adjacent neostriatum of adult zebra finches *Taeniopygia guttata). The Journal of comparative neurology, 360(3), 413-441. https://doi.org/10.1002/cne.903600305 Sex: Undetermined Age: Adult Method: BDA or fluor dextrans
L3	nTOv	Zebra Finch	**Zebra Finch** *Taeniopygia guttata* Vates, G. E., Broome, B. M., Mello, C. V., & Nottebohm, F. (1996). Auditory pathways of caudal telencephalon and their relation to the song system of adult male zebra finches. The Journal of comparative neurology, 366(4), 613-642. https://doi.org/10.1002/(SICI)1096-9861(19960318)366:4<613::AID-CNE5>3.0.CO;2-7 Sex: Males Age: Adult (>P120) Method: BDA (3kDa) o…
L3	HA (Rostral)	Zebra Finch	**Zebra Finch** *Taeniopygia guttata* Wild, J. M., & Williams, M. N. (1999). Rostral wulst of passerine birds: II. Intratelencephalic projections to nuclei associated with the auditory and song systems. The Journal of comparative neurology, 413(4), 520-534. https://doi.org/10.1002/(sici)1096-9861(19991101)413:4<520::aid-cne3>3.0.co;2-b Sex: Undetermined Age: Not Reported Method: BDA, CTB
L3	AD	Zebra Finch	**Zebra Finch** *Taeniopygia guttata* Vates, G. E., Broome, B. M., Mello, C. V., & Nottebohm, F. (1996). Auditory pathways of caudal telencephalon and their relation to the song system of adult male zebra finches. The Journal of comparative neurology, 366(4), 613-642. https://doi.org/10.1002/(SICI)1096-9861(19960318)366:4<613::AID-CNE5>3.0.CO;2-7 Sex: Males Age: Adult (>P120) Method: BDA (3kDa) o…
L3	RA Cup	Zebra Finch	**Zebra Finch** *Taeniopygia guttata* Vates, G. E., Broome, B. M., Mello, C. V., & Nottebohm, F. (1996). Auditory pathways of caudal telencephalon and their relation to the song system of adult male zebra finches. The Journal of comparative neurology, 366(4), 613-642. https://doi.org/10.1002/(SICI)1096-9861(19960318)366:4<613::AID-CNE5>3.0.CO;2-7 Sex: Males Age: Adult (>P120) Method: BDA (3kDa) o…
L3	IHA	Zebra Finch	**Zebra Finch** *Taeniopygia guttata* Wild, J. M., & Williams, M. N. (1999). Rostral wulst of passerine birds: II. Intratelencephalic projections to nuclei associated with the auditory and song systems. The Journal of comparative neurology, 413(4), 520-534. https://doi.org/10.1002/(sici)1096-9861(19991101)413:4<520::aid-cne3>3.0.co;2-b Sex: Undetermined Age: Not Reported Method: BDA
L3	L2a	Zebra Finch	**Zebra Finch** *Taeniopygia guttata* Vates, G. E., Broome, B. M., Mello, C. V., & Nottebohm, F. (1996). Auditory pathways of caudal telencephalon and their relation to the song system of adult male zebra finches. The Journal of comparative neurology, 366(4), 613-642. https://doi.org/10.1002/(SICI)1096-9861(19960318)366:4<613::AID-CNE5>3.0.CO;2-7 Sex: Males Age: Adult (>P120) Method: BDA (3kDa) o…
LHb	VTA	Zebra Finch	**Zebra Finch** *Taeniopygia guttata* Roeser, A., Teoh, H. K., Chen, R., Cohen, I., & Goldberg, J. (2023). The songbird lateral habenula projects to dopaminergic midbrain and is important for normal vocal development. eLife, 12, RP90392. https://doi.org/10.7554/eLife.90392.1 Sex: Males Age: Adult Method: CTB; viral tracer HSV-mCherry
LHb	Ov (Core)	Zebra Finch	**Zebra Finch** *Taeniopygia guttata* Wild J. M. (2017). The ventromedial hypothalamic nucleus in the zebra finch *Taeniopygia guttata): Afferent and efferent projections in relation to the control of reproductive behavior. The Journal of comparative neurology, 525(12), 2657-2676. https://doi.org/10.1002/cne.24225 Sex: Males and Females Age: Adult Method: CTB
LHy	DMHp	Non-Zebra Finch	**Black-capped Chickadee** *Poecile atricapillus* Applegate, M. C., Gutnichenko, K. S., & Aronov, D. (2023). Topography of inputs into the hippocampal formation of a food-caching bird. Journal of Comparative Neurology, 531, 1669-1688. https://doi.org/10.1002/cne.25533 Sex: Undetermined Age: Adult (>P120) Method: CTB
LHy	ICo	Zebra Finch	**Zebra Finch** *Taeniopygia guttata* Wild, J. M., & Williams, M. N. (2000). Rostral wulst in passerine birds. I. Origin, course, and terminations of an avian pyramidal tract. The Journal of comparative neurology, 416(4), 429-450. https://doi.org/10.1002/(SICI)1096-9861(20000124)416:4<429::AID-CNE2>3.0.CO;2-X Sex: Not Reported Age: Not Reported Method: BDA (10kDa) or CTB
LLD	nTOv	Zebra Finch	**Zebra Finch** *Taeniopygia guttata* Wild J. M. (2017). The ventromedial hypothalamic nucleus in the zebra finch *Taeniopygia guttata): Afferent and efferent projections in relation to the control of reproductive behavior. The Journal of comparative neurology, 525(12), 2657-2676. https://doi.org/10.1002/cne.24225 Sex: Males and Females Age: Adult Method: CTB
LLD	Bas	Zebra Finch	**Zebra Finch** *Taeniopygia guttata* Wild, J. M., Krützfeldt, N. O., & Kubke, M. F. (2010). Connections of the auditory brainstem in a songbird, Taeniopygia guttata. III. Projections of the superior olive and lateral lemniscal nuclei. The Journal of comparative neurology, 518(11), 2149-2167. https://doi.org/10.1002/cne.22325 Sex: Males Age: Adult Method: BDA
LLD	Ov (Core)	Zebra Finch	**Zebra Finch** *Taeniopygia guttata* Vates, G. E., Broome, B. M., Mello, C. V., & Nottebohm, F. (1996). Auditory pathways of caudal telencephalon and their relation to the song system of adult male zebra finches. The Journal of comparative neurology, 366(4), 613-642. https://doi.org/10.1002/(SICI)1096-9861(19960318)366:4<613::AID-CNE5>3.0.CO;2-7 Sex: Males Age: Adult (>P120) Method: BDA (3kDa) o…
LLD	Ov (Shell)	Zebra Finch	**Zebra Finch** *Taeniopygia guttata* Wild, J. M., Krützfeldt, N. O., & Kubke, M. F. (2010). Connections of the auditory brainstem in a songbird, Taeniopygia guttata. III. Projections of the superior olive and lateral lemniscal nuclei. The Journal of comparative neurology, 518(11), 2149-2167. https://doi.org/10.1002/cne.22325 Sex: Males Age: Adult Method: BDA Laterality: ipsilateral
LLD	MLd	Zebra Finch	**Zebra Finch** *Taeniopygia guttata* Faunes, M., & Wild, J. M. (2017). The ascending projections of the nuclei of the descending trigeminal tract (nTTD) in the zebra finch *Taeniopygia guttata). The Journal of comparative neurology, 525(13), 2832-2846. https://doi.org/10.1002/cne.24247 Sex: Undetermined Age: Adult Method: retrograde tracer BDA or CTB --- **Zebra Finch** *Taeniopygia guttata* Krü…
LLI	Bas	Zebra Finch	**Zebra Finch** *Taeniopygia guttata* Wild, J. M., & Farabaugh, S. M. (1996). Organization of afferent and efferent projections of the nucleus basalis prosencephali in a passerine, Taeniopygia guttata. The Journal of comparative neurology, 365(2), 306-328. https://doi.org/10.1002/(SICI)1096-9861(19960205)365:2<306::AID-CNE8>3.0.CO;2-9 Sex: Males Age: Adult Method: BDA, CTB, evoked potentials --- …
LLV	E	Zebra Finch	**Zebra Finch** *Taeniopygia guttata* Nixdorf, B. E., & Bischof, H. J. (1982). Afferent connections of the ectostriatum and visual wulst in the zebra finch *Taeniopygia guttata castanotis Gould)--an HRP study. Brain research, 248(1), 9-17. https://doi.org/10.1016/0006-8993(82)91142-8 Sex: Males Age: Adult Method: HRP
LLV	NM	Zebra Finch	**Zebra Finch** *Taeniopygia guttata* Wild, J. M., Krützfeldt, N. O., & Kubke, M. F. (2009). Afferents to the cochlear nuclei and nucleus laminaris from the ventral nucleus of the lateral lemniscus in the zebra finch (Taeniopygia guttata). Hearing research, 257(1-2), 1-7. https://doi.org/10.1016/j.heares.2009.07.007 Sex: Males Age: Adult (>P100) Method: BDA, CTB, or Fast Blue --- **Zebra Finch** …
LLV	SO	Zebra Finch	**Zebra Finch** *Taeniopygia guttata* Wild, J. M., Krützfeldt, N. O., & Kubke, M. F. (2009). Afferents to the cochlear nuclei and nucleus laminaris from the ventral nucleus of the lateral lemniscus in the zebra finch (Taeniopygia guttata). Hearing research, 257(1-2), 1-7. https://doi.org/10.1016/j.heares.2009.07.007 Sex: Males Age: Adult (>P100) Method: BDA, CTB, or Fast Blue --- **Zebra Finch** …
LLV	ICo	Zebra Finch	**Zebra Finch** *Taeniopygia guttata* Wild, J. M., Krützfeldt, N. O., & Kubke, M. F. (2009). Afferents to the cochlear nuclei and nucleus laminaris from the ventral nucleus of the lateral lemniscus in the zebra finch (Taeniopygia guttata). Hearing research, 257(1-2), 1-7. https://doi.org/10.1016/j.heares.2009.07.007 Sex: Males Age: Adult (>P100) Method: BDA, CTB, or Fast Blue
LLV	Uva	Zebra Finch	**Zebra Finch** *Taeniopygia guttata* Coleman, M. J., Roy, A., Wild, J. M., & Mooney, R. (2007). Thalamic gating of auditory responses in telencephalic song control nuclei. The Journal of neuroscience : the official journal of the Society for Neuroscience, 27(37), 10024-10036. https://doi.org/10.1523/JNEUROSCI.2215-07.2007 Sex: Males Age: Adult (>P120) Method: CTB; BDA --- **Zebra Finch** *Taenio…
LLV	LLI	Zebra Finch	**Zebra Finch** *Taeniopygia guttata* Wild, J. M., Krützfeldt, N. O., & Kubke, M. F. (2009). Afferents to the cochlear nuclei and nucleus laminaris from the ventral nucleus of the lateral lemniscus in the zebra finch (Taeniopygia guttata). Hearing research, 257(1-2), 1-7. https://doi.org/10.1016/j.heares.2009.07.007 Sex: Males Age: Adult (>P100) Method: BDA, CTB, or Fast Blue --- **Zebra Finch** …
LLV	Bas	Zebra Finch	**Zebra Finch** *Taeniopygia guttata* Wild, J. M., Krützfeldt, N. O., & Kubke, M. F. (2010). Connections of the auditory brainstem in a songbird, Taeniopygia guttata. III. Projections of the superior olive and lateral lemniscal nuclei. The Journal of comparative neurology, 518(11), 2149-2167. https://doi.org/10.1002/cne.22325 Sex: Males Age: Adult Method: BDA
LLV	LLD	Zebra Finch	**Zebra Finch** *Taeniopygia guttata* Wild, J. M., Krützfeldt, N. O., & Kubke, M. F. (2010). Connections of the auditory brainstem in a songbird, Taeniopygia guttata. III. Projections of the superior olive and lateral lemniscal nuclei. The Journal of comparative neurology, 518(11), 2149-2167. https://doi.org/10.1002/cne.22325 Sex: Males Age: Adult Method: BDA Laterality: ipsilateral
LLV	MLd	Zebra Finch	**Zebra Finch** *Taeniopygia guttata* Coleman, M. J., Roy, A., Wild, J. M., & Mooney, R. (2007). Thalamic gating of auditory responses in telencephalic song control nuclei. The Journal of neuroscience : the official journal of the Society for Neuroscience, 27(37), 10024-10036. https://doi.org/10.1523/JNEUROSCI.2215-07.2007 Sex: Males Age: Adult (>P120) Method: BDA --- **Zebra Finch** *Taeniopygia…
LLV	NL	Zebra Finch	**Zebra Finch** *Taeniopygia guttata* Krützfeldt, N. O., Logerot, P., Kubke, M. F., & Wild, J. M. (2010). Connections of the auditory brainstem in a songbird, Taeniopygia guttata. I. Projections of nucleus angularis and nucleus laminaris to the auditory torus. The Journal of comparative neurology, 518(11), 2109-2134. https://doi.org/10.1002/cne.22334 Sex: Males Age: Adult (>P100) Method: BDA (10k…
LLV	nTOv	Zebra Finch	**Zebra Finch** *Taeniopygia guttata* Wild J. M. (2017). The ventromedial hypothalamic nucleus in the zebra finch *Taeniopygia guttata): Afferent and efferent projections in relation to the control of reproductive behavior. The Journal of comparative neurology, 525(12), 2657-2676. https://doi.org/10.1002/cne.24225 Sex: Males and Females Age: Adult Method: CTB
LLV	NA	Zebra Finch	**Zebra Finch** *Taeniopygia guttata* Krützfeldt, N. O., Logerot, P., Kubke, M. F., & Wild, J. M. (2010). Connections of the auditory brainstem in a songbird, Taeniopygia guttata. I. Projections of nucleus angularis and nucleus laminaris to the auditory torus. The Journal of comparative neurology, 518(11), 2109–2134. https://doi.org/10.1002/cne.22334 Sex: Males Age: Adult (>P100) Method: BDA (10k…
LLV	Ov (Core)	Zebra Finch	**Zebra Finch** *Taeniopygia guttata* Wild J. M. (2017). The ventromedial hypothalamic nucleus in the zebra finch (Taeniopygia guttata): Afferent and efferent projections in relation to the control of reproductive behavior. The Journal of comparative neurology, 525(12), 2657-2676. https://doi.org/10.1002/cne.24225 Sex: Males and Females Age: Adult Method: CTB
LLV	Ov (Shell)	Zebra Finch	**Zebra Finch** *Taeniopygia guttata* Wild, J. M., Krützfeldt, N. O., & Kubke, M. F. (2010). Connections of the auditory brainstem in a songbird, Taeniopygia guttata. III. Projections of the superior olive and lateral lemniscal nuclei. The Journal of comparative neurology, 518(11), 2149-2167. https://doi.org/10.1002/cne.22325 Sex: Males Age: Adult Method: BDA
LM	OCb	Zebra Finch	**Zebra Finch** *Taeniopygia guttata* Gaede, A. H., Gutierrez-Ibanez, C., Armstrong, M. S., Altshuler, D. L., & Wylie, D. R. (2019). Pretectal projections to the oculomotor cerebellum in hummingbirds (Calypte anna), zebra finches *Taeniopygia guttata), and pigeons (Columba livia). The Journal of comparative neurology, 527(16), 2644-2658. https://doi.org/10.1002/cne.24697 Sex: Males Age: Adult Met…
LM	VTA	Zebra Finch	**Zebra Finch** *Taeniopygia guttata* Wu, P.-H. (2020). Neural projections from midbrain optic flow nuclei to the inferior olive and vestibulocerebellum of zebra finches (Taeniopygia guttata) (Doctoral dissertation). University of British Columbia. Retrieved from https://open.library.ubc.ca/collections/ubctheses/24/items/1.0395459 Sex: Males Age: Adult Method: Dextran
LM	nBOR	Zebra Finch	**Zebra Finch** *Taeniopygia guttata* Gaede, A. H., Gutiérrez-Ibáñez, C., Wu, P. H., Pilon, M. C., Altshuler, D. L., & Wylie, D. R. (2024). Topography of visual and somatosensory inputs to the pontine nuclei in zebra finches *Taeniopygia guttata). The Journal of comparative neurology, 532(2), e25556. https://doi.org/10.1002/cne.25556 Sex: Males Age: Adult Method: anterograde tracing Texas red and…
LM	PM	Zebra Finch	**Zebra Finch** *Taeniopygia guttata* Wu, P.-H. (2020). Neural projections from midbrain optic flow nuclei to the inferior olive and vestibulocerebellum of zebra finches (Taeniopygia guttata) (Doctoral dissertation). University of British Columbia. Retrieved from https://open.library.ubc.ca/collections/ubctheses/24/items/1.0395459 Sex: Males Age: Adult Method: Dextran
LM	DIVA	Zebra Finch	**Zebra Finch** *Taeniopygia guttata* Wu, P.-H. (2020). Neural projections from midbrain optic flow nuclei to the inferior olive and vestibulocerebellum of zebra finches (Taeniopygia guttata) (Doctoral dissertation). University of British Columbia. Retrieved from https://open.library.ubc.ca/collections/ubctheses/24/items/1.0395459 Sex: Males Age: Adult Method: Dextran
LM	VbC	Zebra Finch	**Zebra Finch** *Taeniopygia guttata* Gaede, A. H., Gutierrez-Ibanez, C., Armstrong, M. S., Altshuler, D. L., & Wylie, D. R. (2019). Pretectal projections to the oculomotor cerebellum in hummingbirds (Calypte anna), zebra finches *Taeniopygia guttata), and pigeons (Columba livia). The Journal of comparative neurology, 527(16), 2644-2658. https://doi.org/10.1002/cne.24697 Sex: Males Age: Adult Met…
LM	IO	Zebra Finch	**Zebra Finch** *Taeniopygia guttata* Gaede, A. H., Gutiérrez-Ibáñez, C., Wu, P. H., Pilon, M. C., Altshuler, D. L., & Wylie, D. R. (2024). Topography of visual and somatosensory inputs to the pontine nuclei in zebra finches *Taeniopygia guttata). The Journal of comparative neurology, 532(2), e25556. https://doi.org/10.1002/cne.25556 Sex: Males Age: Adult Method: anterograde tracing Texas red and…
LM	Uva	Zebra Finch	**Zebra Finch** *Taeniopygia guttata* Wild, J. M., & Gaede, A. H. (2016). Second tectofugal pathway in a songbird *Taeniopygia guttata) revisited: Tectal and lateral pontine projections to the posterior thalamus, thence to the intermediate nidopallium. The Journal of comparative neurology, 524(5), 963-985. https://doi.org/10.1002/cne.23886 Sex: Undetermined Age: Adult (>P100) Method: CTB
LM	DLA	Zebra Finch	**Zebra Finch** *Taeniopygia guttata* Wylie, D. R., Gaede, A. H., Gutiérrez-Ibáñez, C., Wu, P. H., Pilon, M. C., Azargoon, S., & Altshuler, D. L. (2023). Topography of optic flow processing in olivo-cerebellar pathways in zebra finches (Taeniopygia guttata). The Journal of comparative neurology, 531(6), 640-662. https://doi.org/10.1002/cne.25454 Sex: Males Age: Adult Method: fluorescent dextran
LMAN	MSt	Zebra Finch	**Zebra Finch** *Taeniopygia guttata* Bottjer, S. W., Brady, J. D., & Cribbs, B. (2000). Connections of a motor cortical region in zebra finches: relation to pathways for vocal learning. The Journal of comparative neurology, 420(2), 244-260. https://doi.org/10.1002/(SICI)1096-9861(20000501)420:2<244::AID-CNE7>3.0.CO;2-M Sex: Males Age: Adult Method: fluorescent tracers rhodamine dextran amine; an…
LMAN	AI	Zebra Finch	**Zebra Finch** *Taeniopygia guttata* Bottjer, S. W., & Altenau, B. (2010). Parallel pathways for vocal learning in basal ganglia of songbirds. Nature neuroscience, 13(2), 153-155. https://doi.org/10.1038/nn.2472 Sex: Males Age: Adult Method: WGA-HRP or dextran-Alexa --- **Zebra Finch** *Taeniopygia guttata* Bottjer, S. W., Brady, J. D., & Cribbs, B. (2000). Connections of a motor cortical region…
LMAN	AIV	Zebra Finch	**Zebra Finch** *Taeniopygia guttata* Paterson, A. K., & Bottjer, S. W. (2017). Cortical inter-hemispheric circuits for multimodal vocal learning in songbirds. The Journal of comparative neurology, 525(15), 3312-3340. https://doi.org/10.1002/cne.24280 Sex: Males Age: Adult (100-180 dph) Method: Fluorescently conjugated CTB and dextran amines -- **Zebra Finch** *Taeniopygia guttata* Bottjer, S. W.…
LMAN	HA (Rostral)	Zebra Finch	**Zebra Finch** *Taeniopygia guttata* Wild, J. M., & Williams, M. N. (1999). Rostral wulst of passerine birds: II. Intratelencephalic projections to nuclei associated with the auditory and song systems. The Journal of comparative neurology, 413(4), 520-534. https://doi.org/10.1002/(sici)1096-9861(19991101)413:4<520::aid-cne3>3.0.co;2-b Sex: Undetermined Age: Not Reported Method: BDA, CTB
LMAN	Area X	Zebra Finch	**Zebra Finch** *Taeniopygia guttata* Bottjer, S. W., Brady, J. D., & Cribbs, B. (2000). Connections of a motor cortical region in zebra finches: relation to pathways for vocal learning. The Journal of comparative neurology, 420(2), 244-260. https://doi.org/10.1002/(SICI)1096-9861(20000501)420:2<244::AID-CNE7>3.0.CO;2-M Sex: Males Age: Adult Method: fluorescent tracers rhodamine dextran amine; an…
LMAN	RA	Zebra Finch|Non-Zebra Finch	**Zebra Finch** *Taeniopygia guttata* Bottjer, S. W., & Altenau, B. (2010). Parallel pathways for vocal learning in basal ganglia of songbirds. Nature neuroscience, 13(2), 153-155. https://doi.org/10.1038/nn.2472 Sex: Males Age: Adult Method: WGA-HRP or dextran-Alexa --- **Zebra Finch** *Taeniopygia guttata* Bottjer, S. W., Halsema, K. A., Brown, S. A., & Miesner, E. A. (1989). Axonal connections…
LMAN	paraHVC	Zebra Finch	**Zebra Finch** *Taeniopygia guttata* Foster, E. F., & Bottjer, S. W. (1998). Axonal connections of the high vocal center and surrounding cortical regions in juvenile and adult male zebra finches. The Journal of comparative neurology, 397(1), 118-138. https://doi.org/10.1002/(SICI)1096-9861(19980720)397:1<118::AID-CNE9>3.0.CO;2-3 Sex: Males Age: Adults and Juvenlies (20-30 pdh) Method: rhodamine …
LMAN	AD	Zebra Finch	**Zebra Finch** *Taeniopygia guttata* Miller-Sims, V. C., & Bottjer, S. W. (2012). Auditory experience refines cortico-basal ganglia inputs to motor cortex via remapping of single axons during vocal learning in zebra finches. Journal of neurophysiology, 107(4), 1142-1156. https://doi.org/10.1152/jn.00614.2011 Sex: Males Age: Juvenile (20, 27, 35 dph) Method: BDA (10 kDa)
LMAN	HVC	Zebra Finch|Non-Zebra Finch	**Zebra Finch** *Taeniopygia guttata* Bottjer, S. W., Halsema, K. A., Brown, S. A., & Miesner, E. A. (1989). Axonal connections of a forebrain nucleus involved with vocal learning in zebra finches. The Journal of comparative neurology, 279(2), 312-326. https://doi.org/10.1002/cne.902790211 Sex: Males Age: Adult (>P90) Method: WGA-HRP --- **Zebra Finch** *Taeniopygia guttata* Foster, E. F., & Bott…
LMAN	NCL	Zebra Finch|Non-Zebra Finch	**Zebra Finch** *Taeniopygia guttata* Bottjer, S. W., Brady, J. D., & Cribbs, B. (2000). Connections of a motor cortical region in zebra finches: relation to pathways for vocal learning. The Journal of comparative neurology, 420(2), 244-260. https://doi.org/10.1002/(SICI)1096-9861(20000501)420:2<244::AID-CNE7>3.0.CO;2-M Sex: Males Age: Adult Method: fluorescent tracers rhodamine dextran amine; an…
LoC	MSt	Zebra Finch	**Zebra Finch** *Taeniopygia guttata* Castelino, C. B., Diekamp, B., & Ball, G. F. (2007). Noradrenergic projections to the song control nucleus area X of the medial striatum in male zebra finches *Taeniopygia guttata). The Journal of comparative neurology, 502(4), 544-562. https://doi.org/10.1002/cne.21337 Sex: Males Age: Adult Method: retrograde tracer CTB, anterograde tracer BDA
LoC	Expiratory Muscles	Zebra Finch	**Zebra Finch** *Taeniopygia guttata* Wild, J. M., Li, D., & Eagleton, C. (1997). Projections of the dorsomedial nucleus of the intercollicular complex (DM) in relation to respiratory-vocal nuclei in the brainstem of pigeon (Columba livia) and zebra finch (Taeniopygia guttata). The Journal of comparative neurology, 377(3), 392-413. https://doi.org/10.1002/(sici)1096-9861(19970120)377:3<392::aid-c…
LoC	NFL	Zebra Finch	**Zebra Finch** *Taeniopygia guttata* Sadananda, M., & Bischof, H. J. (2006). Afferentation of the lateral nidopallium: A tracing study of a brain area involved in sexual imprinting in the zebra finch (Taeniopygia guttata). Brain research, 1106(1), 111-122. https://doi.org/10.1016/j.brainres.2006.04.009 Sex: Undetermined Age: Adult Method: RITC
LoC	HVC	Zebra Finch|Non-Zebra Finch	**Zebra Finch** *Taeniopygia guttata* Alvarado, J. S., Hatfield, J., & Mooney, R. (2023). Divergent projections from locus coeruleus to the corticobasal ganglia system and ventral tegmental area of the adult male zebra finch. The Journal of comparative neurology, 531(8), 921-934. https://doi.org/10.1002/cne.25474 Sex: Males Age: Adult (>P90) Method: fluorescent dextran or CTB --- **Canary** *Seri…
LoC	DLM	Zebra Finch	**Zebra Finch** *Taeniopygia guttata* Alvarado, J. S., Hatfield, J., & Mooney, R. (2023). Divergent projections from locus coeruleus to the corticobasal ganglia system and ventral tegmental area of the adult male zebra finch. The Journal of comparative neurology, 531(8), 921-934. https://doi.org/10.1002/cne.25474 Sex: Males Age: Adult (>P90) Method: fluorescent dextran or CTB
LoC	NCL	Zebra Finch	**Zebra Finch** *Taeniopygia guttata* Sadananda, M., Korte, S., & Bischof, H. J. (2007). Afferentation of a caudal forebrain area activated during courtship behavior: a tracing study in the zebra finch *Taeniopygia guttata). Brain research, 1184, 108-120. https://doi.org/10.1016/j.brainres.2007.09.040 Sex: Males Age: Adult Method: Rhodamine B-Isothiocyanate and Diamidino Yellow (Dihydrochloride);…
LoC	SN	Zebra Finch	**Zebra Finch** *Taeniopygia guttata* Alvarado, J. S., Hatfield, J., & Mooney, R. (2023). Divergent projections from locus coeruleus to the corticobasal ganglia system and ventral tegmental area of the adult male zebra finch. The Journal of comparative neurology, 531(8), 921-934. https://doi.org/10.1002/cne.25474 Sex: Males Age: Adult (>P90) Method: fluorescent dextran or CTB --- **Zebra Finch** …
LoC	NIM	Zebra Finch	**Zebra Finch** *Taeniopygia guttata* Castelino, C. B., Diekamp, B., & Ball, G. F. (2007). Noradrenergic projections to the song control nucleus area X of the medial striatum in male zebra finches *Taeniopygia guttata). The Journal of comparative neurology, 502(4), 544-562. https://doi.org/10.1002/cne.21337 Sex: Males Age: Adult Method: retrograde tracer CTB, anterograde tracer BDA
LoC	Area X	Zebra Finch	**Zebra Finch** *Taeniopygia guttata* Alvarado, J. S., Hatfield, J., & Mooney, R. (2023). Divergent projections from locus coeruleus to the corticobasal ganglia system and ventral tegmental area of the adult male zebra finch. The Journal of comparative neurology, 531(8), 921-934. https://doi.org/10.1002/cne.25474 Sex: Males Age: Adult (>P90) Method: fluorescent dextran or CTB --- **Zebra Finch** …
LoC	VP	Zebra Finch	**Zebra Finch** *Taeniopygia guttata* Li, R., Zuo, M. X., & Sakaguchi, H. (1999). Auditory-vocal cholinergic pathway in zebra finch brain. Neuroreport, 10(1), 165-169. https://doi.org/10.1097/00001756-199901180-00032 Sex: Males Age: Adult Method: anterograde and retrograde tracer BDA; retrograde tracer fluoro-red
LoC	RA	Zebra Finch|Non-Zebra Finch	**Zebra Finch** *Taeniopygia guttata* Alvarado, J. S., Hatfield, J., & Mooney, R. (2023). Divergent projections from locus coeruleus to the corticobasal ganglia system and ventral tegmental area of the adult male zebra finch. The Journal of comparative neurology, 531(8), 921-934. https://doi.org/10.1002/cne.25474 Sex: Males Age: Adult (>P90) Method: fluorescent dextran or CTB --- **Canary** *Seri…
LoC	NIL	Zebra Finch	**Zebra Finch** *Taeniopygia guttata* Sadananda, M., & Bischof, H. J. (2006). Afferentation of the lateral nidopallium: A tracing study of a brain area involved in sexual imprinting in the zebra finch *Taeniopygia guttata). Brain research, 1106(1), 111-122. https://doi.org/10.1016/j.brainres.2006.04.009 Sex: Undetermined Age: "fully adult" (no age given) Method: RITC
LoC	LMAN	Zebra Finch	**Zebra Finch** *Taeniopygia guttata* Alvarado, J. S., Hatfield, J., & Mooney, R. (2023). Divergent projections from locus coeruleus to the corticobasal ganglia system and ventral tegmental area of the adult male zebra finch. The Journal of comparative neurology, 531(8), 921-934. https://doi.org/10.1002/cne.25474 Sex: Males Age: Adult (>P90) Method: fluorescent dextran or CTB
LoC	Uva	Zebra Finch	**Zebra Finch** *Taeniopygia guttata* Faunes, M., & Wild, J. M. (2017). The ascending projections of the nuclei of the descending trigeminal tract (nTTD) in the zebra finch *Taeniopygia guttata). The Journal of comparative neurology, 525(13), 2832-2846. https://doi.org/10.1002/cne.24247 Sex: Undetermined Age: Adult Method: retrograde tracer BDA or CTB
LoC	ICo	Zebra Finch	**Zebra Finch** *Taeniopygia guttata* Castelino, C. B., Diekamp, B., & Ball, G. F. (2007). Noradrenergic projections to the song control nucleus area X of the medial striatum in male zebra finches *Taeniopygia guttata). The Journal of comparative neurology, 502(4), 544-562. https://doi.org/10.1002/cne.21337 Sex: Males Age: Adult Method: retrograde tracer CTB, anterograde tracer BDA
LoC	DIVA	Zebra Finch	**Zebra Finch** *Taeniopygia guttata* Faunes, M., & Wild, J. M. (2017). The ascending projections of the nuclei of the descending trigeminal tract (nTTD) in the zebra finch *Taeniopygia guttata). The Journal of comparative neurology, 525(13), 2832-2846. https://doi.org/10.1002/cne.24247 Sex: Undetermined Age: Adult Method: retrograde tracer BDA or CTB
LoC	CG	Zebra Finch	**Zebra Finch** *Taeniopygia guttata* Castelino, C. B., Diekamp, B., & Ball, G. F. (2007). Noradrenergic projections to the song control nucleus area X of the medial striatum in male zebra finches *Taeniopygia guttata). The Journal of comparative neurology, 502(4), 544-562. https://doi.org/10.1002/cne.21337 Sex: Males Age: Adult Method: retrograde tracer CTB, anterograde tracer BDA
LoC	DLHp	Non-Zebra Finch	**Black-capped Chickadee** *Poecile atricapillus* Applegate, M. C., Gutnichenko, K. S., & Aronov, D. (2023). Topography of inputs into the hippocampal formation of a food-caching bird. Journal of Comparative Neurology, 531, 1669-1688. https://doi.org/10.1002/cne.25533 Sex: Undetermined Age: Adult (>P120) Method: CTB
LoC	AI	Zebra Finch	**Zebra Finch** *Taeniopygia guttata* Sadananda, M., Korte, S., & Bischof, H. J. (2007). Afferentation of a caudal forebrain area activated during courtship behavior: a tracing study in the zebra finch *Taeniopygia guttata). Brain research, 1184, 108-120. https://doi.org/10.1016/j.brainres.2007.09.040 Sex: Males Age: Adult Method: Rhodamine B-Isothiocyanate and Diamidino Yellow (Dihydrochloride);…
LoC	NCM	Zebra Finch	**Zebra Finch** *Taeniopygia guttata* Barr, H. J., Wall, E. M., & Woolley, S. C. (2021). Dopamine in the songbird auditory cortex shapes auditory preference. Current biology : CB, 31(20), 4547-4559.e5. https://doi.org/10.1016/j.cub.2021.08.005 Sex: Females Age: Adult Method: retrograde tracer Texas-red conjugated dextran --- **Zebra Finch** *Taeniopygia guttata* Katic, J., Morohashi, Y., & Yazaki…
LoC	VTA	Zebra Finch	**Zebra Finch** *Taeniopygia guttata* Alvarado, J. S., Hatfield, J., & Mooney, R. (2023). Divergent projections from locus coeruleus to the corticobasal ganglia system and ventral tegmental area of the adult male zebra finch. The Journal of comparative neurology, 531(8), 921-934. https://doi.org/10.1002/cne.25474 Sex: Males Age: Adult (>P90) Method: fluorescent dextran or CTB --- **Zebra Finch** …
LoC	OT	Zebra Finch	**Zebra Finch** *Taeniopygia guttata* Castelino, C. B., Diekamp, B., & Ball, G. F. (2007). Noradrenergic projections to the song control nucleus area X of the medial striatum in male zebra finches *Taeniopygia guttata). The Journal of comparative neurology, 502(4), 544-562. https://doi.org/10.1002/cne.21337 Sex: Males Age: Adult Method: retrograde tracer CTB, anterograde tracer BDA
Lower Eyelid	PrV	Zebra Finch	**Zebra Finch** *Taeniopygia guttata* Faunes, M., & Wild, J. M. (2017). The sensory trigeminal complex and the organization of its primary afferents in the zebra finch (Taeniopygia guttata). The Journal of comparative neurology, 525(13), 2820-2831. https://doi.org/10.1002/cne.24249 Sex: Males Age: Adult Method: Transganglionic CTB labeling
Lower Eyelid	nTS	Zebra Finch	**Zebra Finch** *Taeniopygia guttata* Faunes, M., & Wild, J. M. (2017). The sensory trigeminal complex and the organization of its primary afferents in the zebra finch *Taeniopygia guttata). The Journal of comparative neurology, 525(13), 2820-2831. https://doi.org/10.1002/cne.24249 Sex: Males Age: Adult Method: Transganglionic CTB labeling
Lower Eyelid	nTTDc	Zebra Finch	**Zebra Finch** *Taeniopygia guttata* Faunes, M., & Wild, J. M. (2017). The sensory trigeminal complex and the organization of its primary afferents in the zebra finch *Taeniopygia guttata). The Journal of comparative neurology, 525(13), 2820-2831. https://doi.org/10.1002/cne.24249 Sex: Males Age: Adult Method: Transganglionic CTB labeling
Lower Eyelid	nTTDo	Zebra Finch	**Zebra Finch** *Taeniopygia guttata* Faunes, M., & Wild, J. M. (2017). The sensory trigeminal complex and the organization of its primary afferents in the zebra finch *Taeniopygia guttata). The Journal of comparative neurology, 525(13), 2820-2831. https://doi.org/10.1002/cne.24249 Sex: Males Age: Adult Method: Transganglionic CTB labeling
Lower Eyelid	nTTDi	Zebra Finch	**Zebra Finch** *Taeniopygia guttata* Faunes, M., & Wild, J. M. (2017). The sensory trigeminal complex and the organization of its primary afferents in the zebra finch *Taeniopygia guttata). The Journal of comparative neurology, 525(13), 2820-2831. https://doi.org/10.1002/cne.24249 Sex: Males Age: Adult Method: Transganglionic CTB labeling
Lower Eyelid	CuE	Zebra Finch	**Zebra Finch** *Taeniopygia guttata* Faunes, M., & Wild, J. M. (2017). The sensory trigeminal complex and the organization of its primary afferents in the zebra finch *Taeniopygia guttata). The Journal of comparative neurology, 525(13), 2820-2831. https://doi.org/10.1002/cne.24249 Sex: Males Age: Adult Method: Transganglionic CTB labeling
Lower Jaw	nTTDc	Zebra Finch	**Zebra Finch** *Taeniopygia guttata* Faunes, M., & Wild, J. M. (2017). The sensory trigeminal complex and the organization of its primary afferents in the zebra finch (Taeniopygia guttata). The Journal of comparative neurology, 525(13), 2820-2831. https://doi.org/10.1002/cne.24249 Sex: Males Age: Adult Method: Transganglionic CTB labeling
Lower Jaw	CuE	Zebra Finch	**Zebra Finch** *Taeniopygia guttata* Faunes, M., & Wild, J. M. (2017). The sensory trigeminal complex and the organization of its primary afferents in the zebra finch *Taeniopygia guttata). The Journal of comparative neurology, 525(13), 2820-2831. https://doi.org/10.1002/cne.24249 Sex: Males Age: Adult Method: Transganglionic CTB labeling
Lower Jaw	nTTDo	Zebra Finch	**Zebra Finch** *Taeniopygia guttata* Faunes, M., & Wild, J. M. (2017). The sensory trigeminal complex and the organization of its primary afferents in the zebra finch *Taeniopygia guttata). The Journal of comparative neurology, 525(13), 2820-2831. https://doi.org/10.1002/cne.24249 Sex: Males Age: Adult Method: Transganglionic CTB labeling
Lower Jaw	nTTDi	Zebra Finch	**Zebra Finch** *Taeniopygia guttata* Faunes, M., & Wild, J. M. (2017). The sensory trigeminal complex and the organization of its primary afferents in the zebra finch *Taeniopygia guttata). The Journal of comparative neurology, 525(13), 2820-2831. https://doi.org/10.1002/cne.24249 Sex: Males Age: Adult Method: Transganglionic CTB labeling
Lower Jaw	PrV	Zebra Finch	**Zebra Finch** *Taeniopygia guttata* Faunes, M., & Wild, J. M. (2017). The sensory trigeminal complex and the organization of its primary afferents in the zebra finch *Taeniopygia guttata). The Journal of comparative neurology, 525(13), 2820-2831. https://doi.org/10.1002/cne.24249 Sex: Males Age: Adult Method: Transganglionic CTB labeling
Lower Jaw	nTS	Zebra Finch	**Zebra Finch** *Taeniopygia guttata* Faunes, M., & Wild, J. M. (2017). The sensory trigeminal complex and the organization of its primary afferents in the zebra finch *Taeniopygia guttata). The Journal of comparative neurology, 525(13), 2820-2831. https://doi.org/10.1002/cne.24249 Sex: Males Age: Adult Method: Transganglionic CTB labeling
LPC	VbC	Zebra Finch	**Zebra Finch** *Taeniopygia guttata* Gaede, A. H., Gutierrez-Ibanez, C., Armstrong, M. S., Altshuler, D. L., & Wylie, D. R. (2019). Pretectal projections to the oculomotor cerebellum in hummingbirds (Calypte anna), zebra finches *Taeniopygia guttata), and pigeons (Columba livia). The Journal of comparative neurology, 527(16), 2644-2658. https://doi.org/10.1002/cne.24697 Sex: Males Age: Adult Met…
LPC	OCb	Zebra Finch	**Zebra Finch** *Taeniopygia guttata* Gaede, A. H., Gutierrez-Ibanez, C., Armstrong, M. S., Altshuler, D. L., & Wylie, D. R. (2019). Pretectal projections to the oculomotor cerebellum in hummingbirds (Calypte anna), zebra finches *Taeniopygia guttata), and pigeons (Columba livia). The Journal of comparative neurology, 527(16), 2644-2658. https://doi.org/10.1002/cne.24697 Sex: Males Age: Adult Met…
LPC	PM	Zebra Finch	**Zebra Finch** *Taeniopygia guttata* Gaede, A. H., Gutiérrez-Ibáñez, C., Wu, P. H., Pilon, M. C., Altshuler, D. L., & Wylie, D. R. (2024). Topography of visual and somatosensory inputs to the pontine nuclei in zebra finches *Taeniopygia guttata). The Journal of comparative neurology, 532(2), e25556. https://doi.org/10.1002/cne.25556 Sex: Males Age: Adult Method: anterograde tracing Texas red and…
LS	DMHp	Non-Zebra Finch	**Black-capped Chickadee** *Poecile atricapillus* Applegate, M. C., Gutnichenko, K. S., & Aronov, D. (2023). Topography of inputs into the hippocampal formation of a food-caching bird. Journal of Comparative Neurology, 531, 1669-1688. https://doi.org/10.1002/cne.25533 Sex: Undetermined Age: Adult (>P120) Method: CTB
LS	POM	Non-Zebra Finch	**European Starling** *Sturnus vulgaris* Riters, L. V., & Alger, S. J. (2004). Neuroanatomical evidence for indirect connections between the medial preoptic nucleus and the song control system: possible neural substrates for sexually motivated song. Cell and tissue research, 316(1), 35-44. https://doi.org/10.1007/s00441-003-0838-6 Sex: Males Age: Adult Method: BDA
LS	DMP	Zebra Finch	**Zebra Finch** *Taeniopygia guttata* Foster, E. F., Mehta, R. P., & Bottjer, S. W. (1997). Axonal connections of the medial magnocellular nucleus of the anterior neostriatum in zebra finches. The Journal of comparative neurology, 382(3), 364-381. https://doi.org/10.1002/cne.903820305 Sex: Males Age: Adult Method: DiI
LSt	E	Zebra Finch	**Zebra Finch** *Taeniopygia guttata* Krützfeldt, N. O., & Wild, J. M. (2004). Definition and connections of the entopallium in the zebra finch *Taeniopygia guttata). The Journal of comparative neurology, 468(3), 452-465. https://doi.org/10.1002/cne.10972 Sex: Males and Females Age: Not Reported Method: BDA
LSt	SpL	Zebra Finch	**Zebra Finch** *Taeniopygia guttata* Person, A. L., Gale, S. D., Farries, M. A., & Perkel, D. J. (2008). Organization of the songbird basal ganglia, including area X. The Journal of comparative neurology, 508(5), 840-866. https://doi.org/10.1002/cne.21699 Sex: Males Age: Adult Method: BDA
LSt	GP	Zebra Finch	**Zebra Finch** *Taeniopygia guttata* Person, A. L., Gale, S. D., Farries, M. A., & Perkel, D. J. (2008). Organization of the songbird basal ganglia, including area X. The Journal of comparative neurology, 508(5), 840-866. https://doi.org/10.1002/cne.21699 Sex: Males Age: Adult Method: BDA
LSt	SN	Zebra Finch	**Zebra Finch** *Taeniopygia guttata* Person, A. L., Gale, S. D., Farries, M. A., & Perkel, D. J. (2008). Organization of the songbird basal ganglia, including area X. The Journal of comparative neurology, 508(5), 840-866. https://doi.org/10.1002/cne.21699 Sex: Males Age: Adult Method: BDA
Lungs	nTS	Zebra Finch	**Zebra Finch** *Taeniopygia guttata* Kubke, M. F., Ross, J. M., & Wild, J. M. (2004). Vagal innervation of the air sacs in a songbird, Taenopygia guttata. Journal of anatomy, 204(4), 283-292. https://doi.org/10.1111/j.0021-8782.2004.00286.x Sex: Not Reported Age: Not Reported Method: CTB --- **Zebra Finch** *Taeniopygia guttata* Wild, J. M., Kubke, M. F., & Mooney, R. (2009). Avian nucleus retro…
MD	NCL	Non-Zebra Finch	**Carrion Crow** *Corvus corone* Kersten, Y., Moll, F. W., Erdle, S., & Nieder, A. (2024). Input and Output Connections of the Crow Nidopallium Caudolaterale. eNeuro, 11(4), ENEURO.0098-24.2024. https://doi.org/10.1523/ENEURO.0098-24.2024 Sex: Males Age: Adult (8-12 years) Method: retrograde CTB
MD	Area X	Zebra Finch	**Zebra Finch** *Taeniopygia guttata* Castelino, C. B., Diekamp, B., & Ball, G. F. (2007). Noradrenergic projections to the song control nucleus area X of the medial striatum in male zebra finches (Taeniopygia guttata). The Journal of comparative neurology, 502(4), 544-562. https://doi.org/10.1002/cne.21337 Sex: Males Age: Adult Method: retrograde tracer CTB, anterograde tracer BDA
MHb	Uva	Zebra Finch	**Zebra Finch** *Taeniopygia guttata* Akutagawa, E., & Konishi, M. (2005). Connections of thalamic modulatory centers to the vocal control system of the zebra finch. Proceedings of the National Academy of Sciences of the United States of America, 102(39), 14086-14091. https://doi.org/10.1073/pnas.0506774102 Sex: Males Age: Adult Method: anterograde or retrograde labeling with BDA or Alexa Fluor 4…
MHb	Ov (Core)	Zebra Finch	**Zebra Finch** *Taeniopygia guttata* Wild J. M. (2017). The ventromedial hypothalamic nucleus in the zebra finch *Taeniopygia guttata): Afferent and efferent projections in relation to the control of reproductive behavior. The Journal of comparative neurology, 525(12), 2657-2676. https://doi.org/10.1002/cne.24225 Sex: Males and Females Age: Adult Method: CTB
MLd	nTOv	Zebra Finch	**Zebra Finch** *Taeniopygia guttata* Wild J. M. (2017). The ventromedial hypothalamic nucleus in the zebra finch *Taeniopygia guttata): Afferent and efferent projections in relation to the control of reproductive behavior. The Journal of comparative neurology, 525(12), 2657-2676. https://doi.org/10.1002/cne.24225 Sex: Males and Females Age: Adult Method: CTB
MLd	Ov (Shell)	Zebra Finch|Non-Zebra Finch	**Zebra Finch** *Taeniopygia guttata* Krützfeldt, N. O., Logerot, P., Kubke, M. F., & Wild, J. M. (2010). Connections of the auditory brainstem in a songbird, Taeniopygia guttata. I. Projections of nucleus angularis and nucleus laminaris to the auditory torus. The Journal of comparative neurology, 518(11), 2109-2134. https://doi.org/10.1002/cne.22334 Sex: Males Age: Adult (>P100) Method: BDA (10k…
MLd	RA Cup	Non-Zebra Finch	**Bengalese Finch** *Lonchura striata domestica* Zeng, S., Zhang, X., Peng, W., & Zuo, M. (2004). Immunohistochemistry and neural connectivity of the Ov shell in the songbird and their evolutionary implications. The Journal of comparative neurology, 470(2), 192-209. https://doi.org/10.1002/cne.11042 Sex: Undetermined Age: Adult Method: BDA (3kDa)
MLd	Ov (Core)	Zebra Finch	**Zebra Finch** *Taeniopygia guttata* Vates, G. E., Broome, B. M., Mello, C. V., & Nottebohm, F. (1996). Auditory pathways of caudal telencephalon and their relation to the song system of adult male zebra finches. The Journal of comparative neurology, 366(4), 613-642. https://doi.org/10.1002/(SICI)1096-9861(19960318)366:4<613::AID-CNE5>3.0.CO;2-7 Sex: Males Age: Adult (>P120) Method: BDA (3kDa) o…
MMAN	HVC	Zebra Finch|Non-Zebra Finch	**Zebra Finch** *Taeniopygia guttata* Bottjer, S. W., Halsema, K. A., Brown, S. A., & Miesner, E. A. (1989). Axonal connections of a forebrain nucleus involved with vocal learning in zebra finches. The Journal of comparative neurology, 279(2), 312-326. https://doi.org/10.1002/cne.902790211 Sex: Males Age: Adult (>P90) Method: WGA-HRP --- **Zebra Finch** *Taeniopygia guttata* Fortune, E. S., & Mar…
MMAN	Av	Zebra Finch	**Zebra Finch** *Taeniopygia guttata* Trusel, M., Zhao, Z., Alam, D., Marks, E., Ikeda, M., Roberts, T. F. (2024) bioRxiv 2022.11.08.515692; doi: https://doi.org/10.1101/2022.11.08.515692 Sex: Males Age: Adults (130-500 dph) Method: BDA
MMAN	paraHVC	Zebra Finch	**Zebra Finch** *Taeniopygia guttata* Foster, E. F., & Bottjer, S. W. (1998). Axonal connections of the high vocal center and surrounding cortical regions in juvenile and adult male zebra finches. The Journal of comparative neurology, 397(1), 118-138. https://doi.org/10.1002/(SICI)1096-9861(19980720)397:1<118::AID-CNE9>3.0.CO;2-3 Sex: Males Age: Adults and Juvenlies (20-30 pdh) Method: rhodamine …
MMAN	Area X	Zebra Finch	**Zebra Finch** *Taeniopygia guttata* Foster, E. F., Mehta, R. P., & Bottjer, S. W. (1997). Axonal connections of the medial magnocellular nucleus of the anterior neostriatum in zebra finches. The Journal of comparative neurology, 382(3), 364-381. https://doi.org/10.1002/cne.903820305 Sex: Males Age: Adult Method: biocytin
MMAN	LMAN	Zebra Finch	**Zebra Finch** *Taeniopygia guttata* Foster, E. F., Mehta, R. P., & Bottjer, S. W. (1997). Axonal connections of the medial magnocellular nucleus of the anterior neostriatum in zebra finches. The Journal of comparative neurology, 382(3), 364-381. https://doi.org/10.1002/cne.903820305 Sex: Males Age: Adult Method: biocytin
MMAN	NCL	Zebra Finch|Non-Zebra Finch	**Zebra Finch** *Taeniopygia guttata* Sadananda, M., Korte, S., & Bischof, H. J. (2007). Afferentation of a caudal forebrain area activated during courtship behavior: a tracing study in the zebra finch *Taeniopygia guttata). Brain research, 1184, 108-120. https://doi.org/10.1016/j.brainres.2007.09.040 Sex: Males Age: Adult Method: Rhodamine B-Isothiocyanate and Diamidino Yellow (Dihydrochloride);…
MS	DMHp	Non-Zebra Finch	**Black-capped Chickadee** *Poecile atricapillus* Applegate, M. C., Gutnichenko, K. S., & Aronov, D. (2023). Topography of inputs into the hippocampal formation of a food-caching bird. Journal of Comparative Neurology, 531, 1669-1688. https://doi.org/10.1002/cne.25533 Sex: Undetermined Age: Adult (>P120) Method: CTB
MS	VHp	Zebra Finch	**Zebra Finch** *Taeniopygia guttata* Székely A. D. (1999). The avian hippocampal formation: subdivisions and connectivity. Behavioural brain research, 98(2), 219-225. https://doi.org/10.1016/s0166-4328(98)00087-4 Sex: Not Reported Age: Not Reported Method: Phaseolus vulgaris-leucoagglutinin (PHA-L)
MS	POM	Non-Zebra Finch	**European Starling** *Sturnus vulgaris* Riters, L. V., & Alger, S. J. (2004). Neuroanatomical evidence for indirect connections between the medial preoptic nucleus and the song control system: possible neural substrates for sexually motivated song. Cell and tissue research, 316(1), 35-44. https://doi.org/10.1007/s00441-003-0838-6 Sex: Males Age: Adult Method: BDA
MSt	VTA	Zebra Finch	**Zebra Finch** *Taeniopygia guttata* Gale, S. D., Person, A. L., & Perkel, D. J. (2008). A novel basal ganglia pathway forms a loop linking a vocal learning circuit with its dopaminergic input. The Journal of comparative neurology, 508(5), 824-839. https://doi.org/10.1002/cne.21700 Sex: Males Age: Adult Method: dextran (10kDa); CTB --- **Zebra Finch** *Taeniopygia guttata* Person, A. L., Gale, S…
MSt	VP	Zebra Finch	**Zebra Finch** *Taeniopygia guttata* Person, A. L., Gale, S. D., Farries, M. A., & Perkel, D. J. (2008). Organization of the songbird basal ganglia, including area X. The Journal of comparative neurology, 508(5), 840-866. https://doi.org/10.1002/cne.21699 Sex: Males Age: Adult Method: BDA
MSt	DLM	Zebra Finch	**Zebra Finch** *Taeniopygia guttata* Person, A. L., Gale, S. D., Farries, M. A., & Perkel, D. J. (2008). Organization of the songbird basal ganglia, including area X. The Journal of comparative neurology, 508(5), 840-866. https://doi.org/10.1002/cne.21699 Sex: Males Age: Adult Method: BDA
MSt	SN	Zebra Finch	**Zebra Finch** *Taeniopygia guttata* Gale, S. D., Person, A. L., & Perkel, D. J. (2008). A novel basal ganglia pathway forms a loop linking a vocal learning circuit with its dopaminergic input. The Journal of comparative neurology, 508(5), 824-839. https://doi.org/10.1002/cne.21700 Sex: Males Age: Adult Method: dextran (10kDa); CTB --- **Zebra Finch** *Taeniopygia guttata* Person, A. L., Gale, S…
MV	Lower Jaw	Zebra Finch|Non-Zebra Finch	**Zebra Finch** *Taeniopygia guttata* Wild, J. M., & Krützfeldt, N. E. (2012). Trigeminal and telencephalic projections to jaw and other upper vocal tract premotor neurons in songbirds: sensorimotor circuitry for beak movements during singing. The Journal of comparative neurology, 520(3), 590-605. https://doi.org/10.1002/cne.22752 Sex: Males Age: Adult Method: CTB, BDA (10kDa) --- **Canary** *Ser…
MV	Tongue	Zebra Finch	**Zebra Finch** *Taeniopygia guttata* Wild J. M. (1990). Peripheral and central terminations of hypoglossal afferents innervating lingual tactile mechanoreceptor complexes in Fringillidae. The Journal of comparative neurology, 298(2), 157-171. https://doi.org/10.1002/cne.902980203 Sex: Not Reported Age: Not Reported Method: CTB-HRP
MV	Upper Jaw	Zebra Finch|Non-Zebra Finch	**Zebra Finch** *Taeniopygia guttata* Wild, J. M., & Krützfeldt, N. E. (2012). Trigeminal and telencephalic projections to jaw and other upper vocal tract premotor neurons in songbirds: sensorimotor circuitry for beak movements during singing. The Journal of comparative neurology, 520(3), 590-605. https://doi.org/10.1002/cne.22752 Sex: Males Age: Adult Method: CTB, BDA (10kDa) --- **Canary** *Ser…
MV	RPcdl	Zebra Finch|Non-Zebra Finch	**Zebra Finch** *Taeniopygia guttata* Wild, J. M., & Krützfeldt, N. E. (2012). Trigeminal and telencephalic projections to jaw and other upper vocal tract premotor neurons in songbirds: sensorimotor circuitry for beak movements during singing. The Journal of comparative neurology, 520(3), 590-605. https://doi.org/10.1002/cne.22752 Sex: Males Age: Adult Method: CTB, BDA (10kDa) --- **Canary** *Ser…
MV	RPcvm	Zebra Finch|Non-Zebra Finch	**Zebra Finch** *Taeniopygia guttata* Wild, J. M., & Krützfeldt, N. E. (2012). Trigeminal and telencephalic projections to jaw and other upper vocal tract premotor neurons in songbirds: sensorimotor circuitry for beak movements during singing. The Journal of comparative neurology, 520(3), 590-605. https://doi.org/10.1002/cne.22752 Sex: Males Age: Adult Method: CTB, BDA (10kDa) --- **Canary** *Ser…
MVIId	Lower Jaw	Zebra Finch|Non-Zebra Finch	**Zebra Finch** *Taeniopygia guttata* Wild, J. M., & Krützfeldt, N. E. (2012). Trigeminal and telencephalic projections to jaw and other upper vocal tract premotor neurons in songbirds: sensorimotor circuitry for beak movements during singing. The Journal of comparative neurology, 520(3), 590-605. https://doi.org/10.1002/cne.22752 Sex: Males Age: Adult Method: CTB, BDA (10kDa) --- **Canary** *Ser…
MVIId	RPcvm	Zebra Finch|Non-Zebra Finch	**Zebra Finch** *Taeniopygia guttata* Wild, J. M., & Krützfeldt, N. E. (2012). Trigeminal and telencephalic projections to jaw and other upper vocal tract premotor neurons in songbirds: sensorimotor circuitry for beak movements during singing. The Journal of comparative neurology, 520(3), 590-605. https://doi.org/10.1002/cne.22752 Sex: Males Age: Adult Method: CTB, BDA (10kDa) --- **Canary** *Ser…
MVIIv	Hyoid	Zebra Finch|Non-Zebra Finch	**Zebra Finch** *Taeniopygia guttata* Wild, J. M., & Krützfeldt, N. E. (2012). Trigeminal and telencephalic projections to jaw and other upper vocal tract premotor neurons in songbirds: sensorimotor circuitry for beak movements during singing. The Journal of comparative neurology, 520(3), 590-605. https://doi.org/10.1002/cne.22752 Sex: Males Age: Adult Method: CTB, BDA (10kDa) --- **Canary** *Ser…
MVIIv	Tongue	Zebra Finch	**Zebra Finch** *Taeniopygia guttata* Wild J. M. (1990). Peripheral and central terminations of hypoglossal afferents innervating lingual tactile mechanoreceptor complexes in Fringillidae. The Journal of comparative neurology, 298(2), 157-171. https://doi.org/10.1002/cne.902980203 Sex: Not Reported Age: Not Reported Method: CTB-HRP
MVL	NFL	Non-Zebra Finch	**Eurasian Blackcap** *Sylvia atricapilla* Kobylkov, D., Schwarze, S., Michalik, B., Winklhofer, M., Mouritsen, H., & Heyers, D. (2020). A newly identified trigeminal brain pathway in a night-migratory bird could be dedicated to transmitting magnetic map information. Proceedings. Biological sciences, 287(1919), 20192788. https://doi.org/10.1098/rspb.2019.2788 Sex: Undetermined Age: Adult Method: …
MVL	NCL	Non-Zebra Finch	**Carrion Crow** *Corvus corone* Kersten, Y., Moll, F. W., Erdle, S., & Nieder, A. (2024). Input and Output Connections of the Crow Nidopallium Caudolaterale. eNeuro, 11(4), ENEURO.0098-24.2024. https://doi.org/10.1523/ENEURO.0098-24.2024 Sex: Males Age: Adult (8-12 years) Method: retrograde CTB
MVL	E	Zebra Finch	**Zebra Finch** *Taeniopygia guttata* Krützfeldt, N. O., & Wild, J. M. (2004). Definition and connections of the entopallium in the zebra finch *Taeniopygia guttata). The Journal of comparative neurology, 468(3), 452-465. https://doi.org/10.1002/cne.10972 Sex: Males and Females Age: Not Reported Method: CTB
NA	MLd	Zebra Finch	**Zebra Finch** *Taeniopygia guttata* Faunes, M., & Wild, J. M. (2017). The ascending projections of the nuclei of the descending trigeminal tract (nTTD) in the zebra finch (Taeniopygia guttata). The Journal of comparative neurology, 525(13), 2832–2846. https://doi.org/10.1002/cne.24247 Sex: Undetermined Age: Adult Method: retrograde BDA or CTB -- **Zebra Finch** *Taeniopygia guttata* Krützfeldt,…
NA	NM	Zebra Finch	**Zebra Finch** *Taeniopygia guttata* Krützfeldt, N. O., Logerot, P., Kubke, M. F., & Wild, J. M. (2010). Connections of the auditory brainstem in a songbird, Taeniopygia guttata. I. Projections of nucleus angularis and nucleus laminaris to the auditory torus. The Journal of comparative neurology, 518(11), 2109–2134. https://doi.org/10.1002/cne.22334 Sex: Males Age: Adult (>P100) Method: BDA (10k…
NA	LLI	Zebra Finch	**Zebra Finch** *Taeniopygia guttata* Krützfeldt, N. O., Logerot, P., Kubke, M. F., & Wild, J. M. (2010). Connections of the auditory brainstem in a songbird, Taeniopygia guttata. I. Projections of nucleus angularis and nucleus laminaris to the auditory torus. The Journal of comparative neurology, 518(11), 2109–2134. https://doi.org/10.1002/cne.22334 Sex: Males Age: Adult (>P100) Method: BDA (10k…
NA	LLV	Zebra Finch	**Zebra Finch** *Taeniopygia guttata* Krützfeldt, N. O., Logerot, P., Kubke, M. F., & Wild, J. M. (2010). Connections of the auditory brainstem in a songbird, Taeniopygia guttata. I. Projections of nucleus angularis and nucleus laminaris to the auditory torus. The Journal of comparative neurology, 518(11), 2109–2134. https://doi.org/10.1002/cne.22334 Sex: Males Age: Adult (>P100) Method: BDA (10k…
nA	Larynx	Zebra Finch|Non-Zebra Finch	**Zebra Finch** *Taeniopygia guttata* Wild, J. M., & Krützfeldt, N. E. (2012). Trigeminal and telencephalic projections to jaw and other upper vocal tract premotor neurons in songbirds: sensorimotor circuitry for beak movements during singing. The Journal of comparative neurology, 520(3), 590-605. https://doi.org/10.1002/cne.22752 Sex: Males Age: Adult Method: CTB, BDA (10kDa) --- **Canary** *Ser…
NA	LLD	Zebra Finch	**Zebra Finch** *Taeniopygia guttata* Krützfeldt, N. O., Logerot, P., Kubke, M. F., & Wild, J. M. (2010). Connections of the auditory brainstem in a songbird, Taeniopygia guttata. II. Projections of nucleus angularis and nucleus laminaris to the superior olive and lateral lemniscal nuclei. The Journal of comparative neurology, 518(11), 2135–2148. https://doi.org/10.1002/cne.22324 Sex: Not Reporte…
NA	SO	Zebra Finch	**Zebra Finch** *Taeniopygia guttata* Krützfeldt, N. O., Logerot, P., Kubke, M. F., & Wild, J. M. (2010). Connections of the auditory brainstem in a songbird, Taeniopygia guttata. II. Projections of nucleus angularis and nucleus laminaris to the superior olive and lateral lemniscal nuclei. The Journal of comparative neurology, 518(11), 2135–2148. https://doi.org/10.1002/cne.22324 Sex: Not Reporte…
NAc	DMP	Zebra Finch	**Zebra Finch** *Taeniopygia guttata* Foster, E. F., Mehta, R. P., & Bottjer, S. W. (1997). Axonal connections of the medial magnocellular nucleus of the anterior neostriatum in zebra finches. The Journal of comparative neurology, 382(3), 364-381. https://doi.org/10.1002/cne.903820305 Sex: Males Age: Adult Method: DiI
nBOR	LM	Zebra Finch	**Zebra Finch** *Taeniopygia guttata* Gaede, A. H., Gutiérrez-Ibáñez, C., Wu, P. H., Pilon, M. C., Altshuler, D. L., & Wylie, D. R. (2024). Topography of visual and somatosensory inputs to the pontine nuclei in zebra finches *Taeniopygia guttata). The Journal of comparative neurology, 532(2), e25556. https://doi.org/10.1002/cne.25556 Sex: Males Age: Adult Method: anterograde tracing Texas red and…
nBOR	VTA	Zebra Finch	**Zebra Finch** *Taeniopygia guttata* Wu, P.-H. (2020). Neural projections from midbrain optic flow nuclei to the inferior olive and vestibulocerebellum of zebra finches (Taeniopygia guttata) (Doctoral dissertation). University of British Columbia. Retrieved from https://open.library.ubc.ca/collections/ubctheses/24/items/1.0395459 Sex: Males Age: Adult Method: Dextran
nBOR	IC	Zebra Finch	**Zebra Finch** *Taeniopygia guttata* Wylie, D. R., Gaede, A. H., Gutiérrez-Ibáñez, C., Wu, P. H., Pilon, M. C., Azargoon, S., & Altshuler, D. L. (2023). Topography of optic flow processing in olivo-cerebellar pathways in zebra finches (Taeniopygia guttata). The Journal of comparative neurology, 531(6), 640-662. https://doi.org/10.1002/cne.25454 Sex: Males Age: Adult Method: fluorescent dextran
nBOR	CG	Zebra Finch	**Zebra Finch** *Taeniopygia guttata* Wylie, D. R., Gaede, A. H., Gutiérrez-Ibáñez, C., Wu, P. H., Pilon, M. C., Azargoon, S., & Altshuler, D. L. (2023). Topography of optic flow processing in olivo-cerebellar pathways in zebra finches (Taeniopygia guttata). The Journal of comparative neurology, 531(6), 640-662. https://doi.org/10.1002/cne.25454 Sex: Males Age: Adult Method: fluorescent dextran
nBOR	DCN	Zebra Finch	**Zebra Finch** *Taeniopygia guttata* Wylie, D. R., Gaede, A. H., Gutiérrez-Ibáñez, C., Wu, P. H., Pilon, M. C., Azargoon, S., & Altshuler, D. L. (2023). Topography of optic flow processing in olivo-cerebellar pathways in zebra finches (Taeniopygia guttata). The Journal of comparative neurology, 531(6), 640-662. https://doi.org/10.1002/cne.25454 Sex: Males Age: Adult Method: fluorescent dextran
nBOR	VeM	Zebra Finch	**Zebra Finch** *Taeniopygia guttata* Wylie, D. R., Gaede, A. H., Gutiérrez-Ibáñez, C., Wu, P. H., Pilon, M. C., Azargoon, S., & Altshuler, D. L. (2023). Topography of optic flow processing in olivo-cerebellar pathways in zebra finches (Taeniopygia guttata). The Journal of comparative neurology, 531(6), 640-662. https://doi.org/10.1002/cne.25454 Sex: Males Age: Adult Method: fluorescent dextran
nBOR	DIVA	Zebra Finch	**Zebra Finch** *Taeniopygia guttata* Wu, P.-H. (2020). Neural projections from midbrain optic flow nuclei to the inferior olive and vestibulocerebellum of zebra finches (Taeniopygia guttata) (Doctoral dissertation). University of British Columbia. Retrieved from https://open.library.ubc.ca/collections/ubctheses/24/items/1.0395459 Sex: Males Age: Adult Method: Dextran
nBOR	DLA	Zebra Finch	**Zebra Finch** *Taeniopygia guttata* Wylie, D. R., Gaede, A. H., Gutiérrez-Ibáñez, C., Wu, P. H., Pilon, M. C., Azargoon, S., & Altshuler, D. L. (2023). Topography of optic flow processing in olivo-cerebellar pathways in zebra finches (Taeniopygia guttata). The Journal of comparative neurology, 531(6), 640-662. https://doi.org/10.1002/cne.25454 Sex: Males Age: Adult Method: fluorescent dextran
nBOR	D	Zebra Finch	**Zebra Finch** *Taeniopygia guttata* Wu, P.-H. (2020). Neural projections from midbrain optic flow nuclei to the inferior olive and vestibulocerebellum of zebra finches (Taeniopygia guttata) (Doctoral dissertation). University of British Columbia. Retrieved from https://open.library.ubc.ca/collections/ubctheses/24/items/1.0395459 Sex: Males Age: Adult Method: Dextran --- **Zebra Finch** *Taeniop…
nBOR	VbC	Zebra Finch	**Zebra Finch** *Taeniopygia guttata* Gaede, A. H., Gutierrez-Ibanez, C., Armstrong, M. S., Altshuler, D. L., & Wylie, D. R. (2019). Pretectal projections to the oculomotor cerebellum in hummingbirds (Calypte anna), zebra finches *Taeniopygia guttata), and pigeons (Columba livia). The Journal of comparative neurology, 527(16), 2644-2658. https://doi.org/10.1002/cne.24697 Sex: Males Age: Adult Met…
nBOR	nIV	Zebra Finch	**Zebra Finch** *Taeniopygia guttata* Wylie, D. R., Gaede, A. H., Gutiérrez-Ibáñez, C., Wu, P. H., Pilon, M. C., Azargoon, S., & Altshuler, D. L. (2023). Topography of optic flow processing in olivo-cerebellar pathways in zebra finches (Taeniopygia guttata). The Journal of comparative neurology, 531(6), 640-662. https://doi.org/10.1002/cne.25454 Sex: Males Age: Adult Method: fluorescent dextran
nBOR	PL	Zebra Finch	**Zebra Finch** *Taeniopygia guttata* Gaede, A. H., Gutiérrez-Ibáñez, C., Wu, P. H., Pilon, M. C., Altshuler, D. L., & Wylie, D. R. (2024). Topography of visual and somatosensory inputs to the pontine nuclei in zebra finches *Taeniopygia guttata). The Journal of comparative neurology, 532(2), e25556. https://doi.org/10.1002/cne.25556 Sex: Males Age: Adult Method: anterograde tracing Texas red and…
nBOR	VeL	Zebra Finch	**Zebra Finch** *Taeniopygia guttata* Wylie, D. R., Gaede, A. H., Gutiérrez-Ibáñez, C., Wu, P. H., Pilon, M. C., Azargoon, S., & Altshuler, D. L. (2023). Topography of optic flow processing in olivo-cerebellar pathways in zebra finches (Taeniopygia guttata). The Journal of comparative neurology, 531(6), 640-662. https://doi.org/10.1002/cne.25454 Sex: Males Age: Adult Method: fluorescent dextran
nBOR	OCb	Zebra Finch	**Zebra Finch** *Taeniopygia guttata* Gaede, A. H., Gutierrez-Ibanez, C., Armstrong, M. S., Altshuler, D. L., & Wylie, D. R. (2019). Pretectal projections to the oculomotor cerebellum in hummingbirds (Calypte anna), zebra finches *Taeniopygia guttata), and pigeons (Columba livia). The Journal of comparative neurology, 527(16), 2644-2658. https://doi.org/10.1002/cne.24697 Sex: Males Age: Adult Met…
nBOR	IO	Zebra Finch	**Zebra Finch** *Taeniopygia guttata* Gaede, A. H., Gutiérrez-Ibáñez, C., Wu, P. H., Pilon, M. C., Altshuler, D. L., & Wylie, D. R. (2024). Topography of visual and somatosensory inputs to the pontine nuclei in zebra finches *Taeniopygia guttata). The Journal of comparative neurology, 532(2), e25556. https://doi.org/10.1002/cne.25556 Sex: Males Age: Adult Method: anterograde tracing Texas red and…
nBOR	nIII	Zebra Finch	**Zebra Finch** *Taeniopygia guttata* Wu, P.-H. (2020). Neural projections from midbrain optic flow nuclei to the inferior olive and vestibulocerebellum of zebra finches (Taeniopygia guttata) (Doctoral dissertation). University of British Columbia. Retrieved from https://open.library.ubc.ca/collections/ubctheses/24/items/1.0395459 Sex: Males Age: Adult Method: Dextran --- **Zebra Finch** *Taeniop…
nBOR	PM	Zebra Finch	**Zebra Finch** *Taeniopygia guttata* Gaede, A. H., Gutiérrez-Ibáñez, C., Wu, P. H., Pilon, M. C., Altshuler, D. L., & Wylie, D. R. (2024). Topography of visual and somatosensory inputs to the pontine nuclei in zebra finches *Taeniopygia guttata). The Journal of comparative neurology, 532(2), e25556. https://doi.org/10.1002/cne.25556 Sex: Males Age: Adult Method: anterograde tracing Texas red and…
nBOR	NR	Zebra Finch	**Zebra Finch** *Taeniopygia guttata* Wu, P.-H. (2020). Neural projections from midbrain optic flow nuclei to the inferior olive and vestibulocerebellum of zebra finches (Taeniopygia guttata) (Doctoral dissertation). University of British Columbia. Retrieved from https://open.library.ubc.ca/collections/ubctheses/24/items/1.0395459 Sex: Males Age: Adult Method: Dextran --- **Zebra Finch** *Taeniop…
NCL	AI	Zebra Finch|Non-Zebra Finch	**Bengalese Finch** *Lonchura striata domestica* Bloomston, N. A., Zaharas, K., Lawley, K., Fenn, T., Person, E., Huber, H., Zhang, Z., & Prather, J. F. (2022). Exploring links from sensory perception to movement and behavioral motivation in the caudal nidopallium of female songbirds. The Journal of comparative neurology, 530(10), 1622-1633. https://doi.org/10.1002/cne.25305 Sex: Females Age: Adu…
NCL	Area X	Zebra Finch	**Zebra Finch** *Taeniopygia guttata* Castelino, C. B., Diekamp, B., & Ball, G. F. (2007). Noradrenergic projections to the song control nucleus area X of the medial striatum in male zebra finches (Taeniopygia guttata). The Journal of comparative neurology, 502(4), 544-562. https://doi.org/10.1002/cne.21337 Sex: Males Age: Adult Method: retrograde tracer CTB, anterograde tracer BDA --- **Zebra Fi…
NCL	NCM	Zebra Finch	**Zebra Finch** *Taeniopygia guttata* Vates, G. E., Broome, B. M., Mello, C. V., & Nottebohm, F. (1996). Auditory pathways of caudal telencephalon and their relation to the song system of adult male zebra finches. The Journal of comparative neurology, 366(4), 613-642. https://doi.org/10.1002/(SICI)1096-9861(19960318)366:4<613::AID-CNE5>3.0.CO;2-7 Sex: Males Age: Adult (>P120) Method: BDA (3kDa) o…
NCL	NFL	Zebra Finch|Non-Zebra Finch	**Zebra Finch** *Taeniopygia guttata* Sadananda, M., & Bischof, H. J. (2006). Afferentation of the lateral nidopallium: A tracing study of a brain area involved in sexual imprinting in the zebra finch *Taeniopygia guttata). Brain research, 1106(1), 111-122. https://doi.org/10.1016/j.brainres.2006.04.009 Sex: Undetermined Age: "fully adult" (no age given) Method: RITC --- **Carrion Crow** *Corvus …
NCL	RA Cup	Zebra Finch	**Zebra Finch** *Taeniopygia guttata* Fortune, E. S., & Margoliash, D. (1995). Parallel pathways and convergence onto HVc and adjacent neostriatum of adult zebra finches *Taeniopygia guttata). The Journal of comparative neurology, 360(3), 413-441. https://doi.org/10.1002/cne.903600305 Sex: Undetermined Age: Adult Method: BDA or fluor dextrans
NCL	CLM	Zebra Finch|Non-Zebra Finch	**Bengalese Finch** *Lonchura striata domestica* Dunning, J. L., Maze, S. E., Atwood, E. J., & Prather, J. F. (2018). Caudal mesopallial neurons in female songbirds bridge sensory and motor brain regions. The Journal of comparative neurology, 526(10), 1703-1711. https://doi.org/10.1002/cne.24440 Sex: Females Age: Adult (>P120) Method: BDA (10kDa) --- **Zebra Finch** *Taeniopygia guttata* Fortune,…
NCL	AIV	Zebra Finch|Non-Zebra Finch	**Bengalese Finch** *Lonchura striata domestica* Bloomston, N. A., Zaharas, K., Lawley, K., Fenn, T., Person, E., Huber, H., Zhang, Z., & Prather, J. F. (2022). Exploring links from sensory perception to movement and behavioral motivation in the caudal nidopallium of female songbirds. The Journal of comparative neurology, 530(10), 1622-1633. https://doi.org/10.1002/cne.25305 Sex: Females Age: Adu…
NCL	AM	Zebra Finch	**Zebra Finch** *Taeniopygia guttata* Wild J. M. (2017). The ventromedial hypothalamic nucleus in the zebra finch *Taeniopygia guttata): Afferent and efferent projections in relation to the control of reproductive behavior. The Journal of comparative neurology, 525(12), 2657-2676. https://doi.org/10.1002/cne.24225 Sex: Males and Females Age: Adult Method: CTB
NCL	LSt	Zebra Finch|Non-Zebra Finch	**Zebra Finch** *Taeniopygia guttata* Wild, J. M., & Farabaugh, S. M. (1996). Organization of afferent and efferent projections of the nucleus basalis prosencephali in a passerine, Taeniopygia guttata. The Journal of comparative neurology, 365(2), 306-328. https://doi.org/10.1002/(SICI)1096-9861(19960205)365:2<306::AID-CNE8>3.0.CO;2-9 Sex: Males Age: Adult Method: BDA --- **Carrion Crow** *Corvus…
NCL	RA	Zebra Finch	**Zebra Finch** *Taeniopygia guttata* Fortune, E. S., & Margoliash, D. (1995). Parallel pathways and convergence onto HVc and adjacent neostriatum of adult zebra finches *Taeniopygia guttata). The Journal of comparative neurology, 360(3), 413-441. https://doi.org/10.1002/cne.903600305 Sex: Undetermined Age: Adult Method: BDA or fluor dextrans
NCL	HA (Rostral)	Zebra Finch	**Zebra Finch** *Taeniopygia guttata* Wild, J. M., & Williams, M. N. (1999). Rostral wulst of passerine birds: II. Intratelencephalic projections to nuclei associated with the auditory and song systems. The Journal of comparative neurology, 413(4), 520-534. https://doi.org/10.1002/(sici)1096-9861(19991101)413:4<520::aid-cne3>3.0.co;2-b Sex: Undetermined Age: Not Reported Method: BDA, CTB
NCL	VMH	Zebra Finch	**Zebra Finch** *Taeniopygia guttata* Wild J. M. (2017). The ventromedial hypothalamic nucleus in the zebra finch *Taeniopygia guttata): Afferent and efferent projections in relation to the control of reproductive behavior. The Journal of comparative neurology, 525(12), 2657-2676. https://doi.org/10.1002/cne.24225 Sex: Males and Females Age: Adult Method: CTB
NCL	AA	Zebra Finch|Non-Zebra Finch	**Bengalese Finch** *Lonchura striata domestica* Bloomston, N. A., Zaharas, K., Lawley, K., Fenn, T., Person, E., Huber, H., Zhang, Z., & Prather, J. F. (2022). Exploring links from sensory perception to movement and behavioral motivation in the caudal nidopallium of female songbirds. The Journal of comparative neurology, 530(10), 1622-1633. https://doi.org/10.1002/cne.25305 Sex: Females Age: Adu…
NCL	AD	Zebra Finch|Non-Zebra Finch	**Bengalese Finch** *Lonchura striata domestica* Bloomston, N. A., Zaharas, K., Lawley, K., Fenn, T., Person, E., Huber, H., Zhang, Z., & Prather, J. F. (2022). Exploring links from sensory perception to movement and behavioral motivation in the caudal nidopallium of female songbirds. The Journal of comparative neurology, 530(10), 1622-1633. https://doi.org/10.1002/cne.25305 Sex: Females Age: Adu…
NCL	CSt	Zebra Finch	**Zebra Finch** *Taeniopygia guttata* Yeh, Y.-T. (2022). Auditory Tuning in Vocal Learning Songbirds. (Doctoral dissertation). Columbia University. Retrieved from https://academiccommons.columbia.edu/doi/10.7916/1hh4-4z76/download Sex: Males Age: Adult Method: CTB; BDA
NCL	NIL	Zebra Finch	**Zebra Finch** *Taeniopygia guttata* Sadananda, M., & Bischof, H. J. (2006). Afferentation of the lateral nidopallium: A tracing study of a brain area involved in sexual imprinting in the zebra finch *Taeniopygia guttata). Brain research, 1106(1), 111-122. https://doi.org/10.1016/j.brainres.2006.04.009 Sex: Undetermined Age: Adult Method: BDA; RITC
NCM	CMM	Zebra Finch	**Zebra Finch** *Taeniopygia guttata* Vates, G. E., Broome, B. M., Mello, C. V., & Nottebohm, F. (1996). Auditory pathways of caudal telencephalon and their relation to the song system of adult male zebra finches. The Journal of comparative neurology, 366(4), 613-642. https://doi.org/10.1002/(SICI)1096-9861(19960318)366:4<613::AID-CNE5>3.0.CO;2-7 Sex: Males Age: Adult (>P120) Method: BDA (3kDa) o…
NCM	NIL	Zebra Finch	**Zebra Finch** *Taeniopygia guttata* Sadananda, M., & Bischof, H. J. (2006). Afferentation of the lateral nidopallium: A tracing study of a brain area involved in sexual imprinting in the zebra finch *Taeniopygia guttata). Brain research, 1106(1), 111-122. https://doi.org/10.1016/j.brainres.2006.04.009 Sex: Undetermined Age: Adult Method: BDA
NCM	NCL	Zebra Finch	**Zebra Finch** *Taeniopygia guttata* Sadananda, M., Korte, S., & Bischof, H. J. (2007). Afferentation of a caudal forebrain area activated during courtship behavior: a tracing study in the zebra finch *Taeniopygia guttata). Brain research, 1184, 108-120. https://doi.org/10.1016/j.brainres.2007.09.040 Sex: Males Age: Adult Method: Rhodamine B-Isothiocyanate and Diamidino Yellow (Dihydrochloride);…
NCM	paraHVC	Zebra Finch	**Zebra Finch** *Taeniopygia guttata* Foster, E. F., & Bottjer, S. W. (1998). Axonal connections of the high vocal center and surrounding cortical regions in juvenile and adult male zebra finches. The Journal of comparative neurology, 397(1), 118-138. https://doi.org/10.1002/(SICI)1096-9861(19980720)397:1<118::AID-CNE9>3.0.CO;2-3 Sex: Males Age: Adults and Juvenlies (20-30 pdh) Method: rhodamine …
NCM	VMH	Zebra Finch	**Zebra Finch** *Taeniopygia guttata* Wild J. M. (2017). The ventromedial hypothalamic nucleus in the zebra finch *Taeniopygia guttata*: Afferent and efferent projections in relation to the control of reproductive behavior. The Journal of comparative neurology, 525(12), 2657-2676. https://doi.org/10.1002/cne.24225 Sex: Males and Females Age: Adult Method: CTB
NCM	AM	Zebra Finch	**Zebra Finch** *Taeniopygia guttata* Wild J. M. (2017). The ventromedial hypothalamic nucleus in the zebra finch *Taeniopygia guttata): Afferent and efferent projections in relation to the control of reproductive behavior. The Journal of comparative neurology, 525(12), 2657-2676. https://doi.org/10.1002/cne.24225 Sex: Males and Females Age: Adult Method: CTB
NCM	CLM	Zebra Finch	**Zebra Finch** *Taeniopygia guttata* Vates, G. E., Broome, B. M., Mello, C. V., & Nottebohm, F. (1996). Auditory pathways of caudal telencephalon and their relation to the song system of adult male zebra finches. The Journal of comparative neurology, 366(4), 613-642. https://doi.org/10.1002/(SICI)1096-9861(19960318)366:4<613::AID-CNE5>3.0.CO;2-7 Sex: Males Age: Adult (>P120) Method: BDA (3kDa) o…
NDB	DMHp	Non-Zebra Finch	**Black-capped Chickadee** *Poecile atricapillus* Applegate, M. C., Gutnichenko, K. S., & Aronov, D. (2023). Topography of inputs into the hippocampal formation of a food-caching bird. Journal of Comparative Neurology, 531, 1669-1688. https://doi.org/10.1002/cne.25533 Sex: Undetermined Age: Adult (>P120) Method: CTB
NFL	CDL	Non-Zebra Finch	**Black-capped Chickadee** *Poecile atricapillus* Applegate, M. C., Gutnichenko, K. S., Mackevicius, E. L., Aronov, D. (2023). An entorhinal-like region in food-caching birds. Current Biology, 33(12), 2465-2477.e7. https://doi.org/10.1016/j.cub.2023.05.031 Sex: Males and Females Age: Adult (>P120) Method: CTB
NFL	AI	Zebra Finch	**Zebra Finch** *Taeniopygia guttata* Wild, J. M., & Farabaugh, S. M. (1996). Organization of afferent and efferent projections of the nucleus basalis prosencephali in a passerine, Taeniopygia guttata. The Journal of comparative neurology, 365(2), 306-328. https://doi.org/10.1002/(SICI)1096-9861(19960205)365:2<306::AID-CNE8>3.0.CO;2-9 Sex: Males Age: Adult Method: BDA, CTB, evoked potentials
NFL	HA (Rostral)	Zebra Finch	**Zebra Finch** *Taeniopygia guttata* Wild, J. M., & Williams, M. N. (1999). Rostral wulst of passerine birds: II. Intratelencephalic projections to nuclei associated with the auditory and song systems. The Journal of comparative neurology, 413(4), 520-534. https://doi.org/10.1002/(sici)1096-9861(19991101)413:4<520::aid-cne3>3.0.co;2-b Sex: Undetermined Age: Not Reported Method: BDA, CTB --- **Ze…
NFL	DLHp	Non-Zebra Finch	**Black-capped Chickadee** *Poecile atricapillus* Applegate, M. C., Gutnichenko, K. S., Mackevicius, E. L., Aronov, D. (2023). An entorhinal-like region in food-caching birds. Current Biology, 33(12), 2465-2477.e7. https://doi.org/10.1016/j.cub.2023.05.031 Sex: Undetermined Age: Adult (>P120) Method: CTB
NFL	NIL	Zebra Finch	**Zebra Finch** *Taeniopygia guttata* Sadananda, M., & Bischof, H. J. (2006). Afferentation of the lateral nidopallium: A tracing study of a brain area involved in sexual imprinting in the zebra finch *Taeniopygia guttata). Brain research, 1106(1), 111-122. https://doi.org/10.1016/j.brainres.2006.04.009 Sex: Undetermined Age: Adult Method: RITC
NFL	MVL	Non-Zebra Finch	**Eurasian Blackcap** *Sylvia atricapilla* Kobylkov, D., Schwarze, S., Michalik, B., Winklhofer, M., Mouritsen, H., & Heyers, D. (2020). A newly identified trigeminal brain pathway in a night-migratory bird could be dedicated to transmitting magnetic map information. Proceedings. Biological sciences, 287(1919), 20192788. https://doi.org/10.1098/rspb.2019.2788 Sex: Undetermined Age: Adult Method: …
NFL	DMHp	Non-Zebra Finch	**Black-capped Chickadee** *Poecile atricapillus* Applegate, M. C., Gutnichenko, K. S., & Aronov, D. (2023). Topography of inputs into the hippocampal formation of a food-caching bird. Journal of Comparative Neurology, 531, 1669-1688. https://doi.org/10.1002/cne.25533 Sex: Undetermined Age: Adult (>P120) Method: CTB --- **Black-capped Chickadee** *Poecile atricapillus* Applegate, M. C., Gutnichen…
NFL	Area X	Zebra Finch	**Zebra Finch** *Taeniopygia guttata* Castelino, C. B., Diekamp, B., & Ball, G. F. (2007). Noradrenergic projections to the song control nucleus area X of the medial striatum in male zebra finches (Taeniopygia guttata). The Journal of comparative neurology, 502(4), 544-562. https://doi.org/10.1002/cne.21337 Sex: Males Age: Adult Method: retrograde tracer CTB, anterograde tracer BDA
NFL	LSt	Zebra Finch	**Zebra Finch** *Taeniopygia guttata* Wild, J. M., & Farabaugh, S. M. (1996). Organization of afferent and efferent projections of the nucleus basalis prosencephali in a passerine, Taeniopygia guttata. The Journal of comparative neurology, 365(2), 306-328. https://doi.org/10.1002/(SICI)1096-9861(19960205)365:2<306::AID-CNE8>3.0.CO;2-9 Sex: Males Age: Adult Method: BDA
NFL	NCL	Zebra Finch|Non-Zebra Finch	**Eurasian Blackcap** *Sylvia atricapilla* Kobylkov, D., Schwarze, S., Michalik, B., Winklhofer, M., Mouritsen, H., & Heyers, D. (2020). A newly identified trigeminal brain pathway in a night-migratory bird could be dedicated to transmitting magnetic map information. Proceedings. Biological sciences, 287(1919), 20192788. https://doi.org/10.1098/rspb.2019.2788 Sex: Undetermined Age: Adult Method: …
NFM	Area X	Zebra Finch	**Zebra Finch** *Taeniopygia guttata* Castelino, C. B., Diekamp, B., & Ball, G. F. (2007). Noradrenergic projections to the song control nucleus area X of the medial striatum in male zebra finches (Taeniopygia guttata). The Journal of comparative neurology, 502(4), 544-562. https://doi.org/10.1002/cne.21337 Sex: Males Age: Adult Method: retrograde tracer CTB, anterograde tracer BDA
NFM	NCL	Zebra Finch	**Zebra Finch** *Taeniopygia guttata* Paterson, A. K., & Bottjer, S. W. (2017). Cortical inter-hemispheric circuits for multimodal vocal learning in songbirds. The Journal of comparative neurology, 525(15), 3312-3340. https://doi.org/10.1002/cne.24280 Sex: Males Age: Adult (100-180 dph) Method: Fluorescently conjugated CTB and dextrine amines
nHpC	POM	Non-Zebra Finch	**European Starling** *Sturnus vulgaris* Riters, L. V., & Alger, S. J. (2004). Neuroanatomical evidence for indirect connections between the medial preoptic nucleus and the song control system: possible neural substrates for sexually motivated song. Cell and tissue research, 316(1), 35-44. https://doi.org/10.1007/s00441-003-0838-6 Sex: Males Age: Adult Method: BDA
NIf	HA (Rostral)	Zebra Finch	**Zebra Finch** *Taeniopygia guttata* Wild, J. M., & Williams, M. N. (1999). Rostral wulst of passerine birds: II. Intratelencephalic projections to nuclei associated with the auditory and song systems. The Journal of comparative neurology, 413(4), 520-534. https://doi.org/10.1002/(sici)1096-9861(19991101)413:4<520::aid-cne3>3.0.co;2-b Sex: Undetermined Age: Not Reported Method: BDA
NIf	CSt	Zebra Finch	**Zebra Finch** *Taeniopygia guttata* Wild J. M. (1994). Visual and somatosensory inputs to the avian song system via nucleus uvaeformis (Uva) and a comparison with the projections of a similar thalamic nucleus in a nonsongbird, Columba livia. The Journal of comparative neurology, 349(4), 512-535. https://doi.org/10.1002/cne.903490403 Sex: Males Age: Not Reported Method: CTB-HRP
NIf	NCL	Zebra Finch	**Zebra Finch** *Taeniopygia guttata* Sadananda, M., Korte, S., & Bischof, H. J. (2007). Afferentation of a caudal forebrain area activated during courtship behavior: a tracing study in the zebra finch (Taeniopygia guttata). Brain research, 1184, 108-120. https://doi.org/10.1016/j.brainres.2007.09.040 Sex: Males Age: Adult Method: Rhodamine B-Isothiocyanate and Diamidino Yellow (Dihydrochloride);…
NIf	Av	Zebra Finch	**Zebra Finch** *Taeniopygia guttata* Akutagawa, E., & Konishi, M. (2010). New brain pathways found in the vocal control system of a songbird. The Journal of comparative neurology, 518(15), 3086-3100. https://doi.org/10.1002/cne.22383 Sex: Males Age: Adult Method: BDA --- **Zebra Finch** *Taeniopygia guttata* Roberts, T. F., Hisey, E., Tanaka, M., Kearney, M. G., Chattree, G., Yang, C. F., Shah, …
NIf	paraHVC	Zebra Finch	**Zebra Finch** *Taeniopygia guttata* Foster, E. F., & Bottjer, S. W. (1998). Axonal connections of the high vocal center and surrounding cortical regions in juvenile and adult male zebra finches. The Journal of comparative neurology, 397(1), 118-138. https://doi.org/10.1002/(SICI)1096-9861(19980720)397:1<118::AID-CNE9>3.0.CO;2-3 Sex: Males Age: Adults and Juvenlies (20-30 pdh) Method: rhodamine …
NIf	HVC Shelf	Zebra Finch	**Zebra Finch** *Taeniopygia guttata* Wild J. M. (1994). Visual and somatosensory inputs to the avian song system via nucleus uvaeformis (Uva) and a comparison with the projections of a similar thalamic nucleus in a nonsongbird, Columba livia. The Journal of comparative neurology, 349(4), 512-535. https://doi.org/10.1002/cne.903490403 Sex: Females Age: Not Reported Method: CTB-HRP
NIf	HVC	Zebra Finch|Non-Zebra Finch	**Zebra Finch** *Taeniopygia guttata* Bottjer, S. W., Halsema, K. A., Brown, S. A., & Miesner, E. A. (1989). Axonal connections of a forebrain nucleus involved with vocal learning in zebra finches. The Journal of comparative neurology, 279(2), 312-326. https://doi.org/10.1002/cne.902790211 Sex: Males Age: Adult (>P90) Method: WGA-HRP --- **Zebra Finch** *Taeniopygia guttata* Fortune, E. S., & Mar…
NIL	IMM	Zebra Finch	**Zebra Finch** *Taeniopygia guttata* Wild, J. M., & Gaede, A. H. (2016). Second tectofugal pathway in a songbird *Taeniopygia guttata) revisited: Tectal and lateral pontine projections to the posterior thalamus, thence to the intermediate nidopallium. The Journal of comparative neurology, 524(5), 963-985. https://doi.org/10.1002/cne.23886 Sex: Undetermined Age: Adult (>P100) Method: CTB
NIL	AI	Zebra Finch	**Zebra Finch** *Taeniopygia guttata* Sadananda, M., Korte, S., & Bischof, H. J. (2007). Afferentation of a caudal forebrain area activated during courtship behavior: a tracing study in the zebra finch *Taeniopygia guttata). Brain research, 1184, 108-120. https://doi.org/10.1016/j.brainres.2007.09.040 Sex: Males Age: Adult Method: Rhodamine B-Isothiocyanate and Diamidino Yellow (Dihydrochloride);…
NIL	NCL	Zebra Finch|Non-Zebra Finch	**Zebra Finch** *Taeniopygia guttata* Sadananda, M., Korte, S., & Bischof, H. J. (2007). Afferentation of a caudal forebrain area activated during courtship behavior: a tracing study in the zebra finch *Taeniopygia guttata). Brain research, 1184, 108-120. https://doi.org/10.1016/j.brainres.2007.09.040 Sex: Males Age: Adult Method: Rhodamine B-Isothiocyanate and Diamidino Yellow (Dihydrochloride);…
NIL	LSt	Zebra Finch	**Zebra Finch** *Taeniopygia guttata* Wild, J. M., & Gaede, A. H. (2016). Second tectofugal pathway in a songbird *Taeniopygia guttata) revisited: Tectal and lateral pontine projections to the posterior thalamus, thence to the intermediate nidopallium. The Journal of comparative neurology, 524(5), 963-985. https://doi.org/10.1002/cne.23886 Sex: Undetermined Age: Adult (>P100) Method: CTB
NIL	DLHp	Non-Zebra Finch	**Black-capped Chickadee** *Poecile atricapillus* Applegate, M. C., Gutnichenko, K. S., Mackevicius, E. L., Aronov, D. (2023). An entorhinal-like region in food-caching birds. Current Biology, 33(12), 2465-2477.e7. https://doi.org/10.1016/j.cub.2023.05.031 Sex: Undetermined Age: Adult (>P120) Method: CTB
NIL	CDL	Non-Zebra Finch	**Black-capped Chickadee** *Poecile atricapillus* Applegate, M. C., Gutnichenko, K. S., Mackevicius, E. L., Aronov, D. (2023). An entorhinal-like region in food-caching birds. Current Biology, 33(12), 2465-2477.e7. https://doi.org/10.1016/j.cub.2023.05.031 Sex: Males and Females Age: Adult (>P120) Method: CTB
NIL	ILM	Zebra Finch	**Zebra Finch** *Taeniopygia guttata* Wild, J. M., & Gaede, A. H. (2016). Second tectofugal pathway in a songbird *Taeniopygia guttata) revisited: Tectal and lateral pontine projections to the posterior thalamus, thence to the intermediate nidopallium. The Journal of comparative neurology, 524(5), 963-985. https://doi.org/10.1002/cne.23886 Sex: Undetermined Age: Adult (>P100) Method: CTB
NIL	DMHp	Non-Zebra Finch	**Black-capped Chickadee** *Poecile atricapillus* Applegate, M. C., Gutnichenko, K. S., & Aronov, D. (2023). Topography of inputs into the hippocampal formation of a food-caching bird. Journal of Comparative Neurology, 531, 1669-1688. https://doi.org/10.1002/cne.25533 Sex: Undetermined Age: Adult (>P120) Method: CTB --- **Black-capped Chickadee** *Poecile atricapillus* Applegate, M. C., Gutnichen…
NIL	NFL	Zebra Finch	**Zebra Finch** *Taeniopygia guttata* Sadananda, M., & Bischof, H. J. (2006). Afferentation of the lateral nidopallium: A tracing study of a brain area involved in sexual imprinting in the zebra finch *Taeniopygia guttata). Brain research, 1106(1), 111-122. https://doi.org/10.1016/j.brainres.2006.04.009 Sex: Undetermined Age: Adult Method: BDA
NIM	NCL	Zebra Finch	**Zebra Finch** *Taeniopygia guttata* Paterson, A. K., & Bottjer, S. W. (2017). Cortical inter-hemispheric circuits for multimodal vocal learning in songbirds. The Journal of comparative neurology, 525(15), 3312-3340. https://doi.org/10.1002/cne.24280 Sex: Males Age: Adult (100-180 dph) Method: Fluorescently conjugated CTB and dextrine amines --- **Zebra Finch** *Taeniopygia guttata* Sadananda, M…
NIM	HA (Caudal)	Non-Zebra Finch	**Garden Warbler** *Sylvia borin* Heyers, D., Musielak, I., Haase, K., Herold, C., Bolte, P., Güntürkün, O., & Mouritsen, H. (2022). Morphology, biochemistry and connectivity of Cluster N and the hippocampal formation in a migratory bird. Brain structure & function, 227(8), 2731–2749. https://doi.org/10.1007/s00429-022-02566-y Sex: Not Reported Age: Not Reported Method: CTB
NIM	paraHVC	Zebra Finch	**Zebra Finch** *Taeniopygia guttata* Foster, E. F., & Bottjer, S. W. (1998). Axonal connections of the high vocal center and surrounding cortical regions in juvenile and adult male zebra finches. The Journal of comparative neurology, 397(1), 118-138. https://doi.org/10.1002/(SICI)1096-9861(19980720)397:1<118::AID-CNE9>3.0.CO;2-3 Sex: Males Age: Adults and Juvenlies (20-30 pdh) Method: rhodamine …
NIM	NIL	Zebra Finch	**Zebra Finch** *Taeniopygia guttata* Sadananda, M., & Bischof, H. J. (2006). Afferentation of the lateral nidopallium: A tracing study of a brain area involved in sexual imprinting in the zebra finch *Taeniopygia guttata). Brain research, 1106(1), 111-122. https://doi.org/10.1016/j.brainres.2006.04.009 Sex: Undetermined Age: Adult Method: BDA
nIXr	Hyoid	Zebra Finch|Non-Zebra Finch	**Zebra Finch** *Taeniopygia guttata* Wild, J. M., & Krützfeldt, N. E. (2012). Trigeminal and telencephalic projections to jaw and other upper vocal tract premotor neurons in songbirds: sensorimotor circuitry for beak movements during singing. The Journal of comparative neurology, 520(3), 590-605. https://doi.org/10.1002/cne.22752 Sex: Males Age: Adult Method: CTB, BDA (10kDa) --- **Canary** *Ser…
NL	LLV	Zebra Finch	**Zebra Finch** *Taeniopygia guttata* Coleman, M. J., Roy, A., Wild, J. M., & Mooney, R. (2007). Thalamic gating of auditory responses in telencephalic song control nuclei. The Journal of neuroscience : the official journal of the Society for Neuroscience, 27(37), 10024-10036. https://doi.org/10.1523/JNEUROSCI.2215-07.2007 Sex: Males Age: Adult (>P120) Method: BDA --- **Zebra Finch** *Taeniopygia…
NL	NFL	Zebra Finch	**Zebra Finch** *Taeniopygia guttata* Sadananda, M., & Bischof, H. J. (2006). Afferentation of the lateral nidopallium: A tracing study of a brain area involved in sexual imprinting in the zebra finch (Taeniopygia guttata). Brain research, 1106(1), 111-122. https://doi.org/10.1016/j.brainres.2006.04.009 Sex: Undetermined Age: Adult Method: BDA
NL	LLD	Zebra Finch	**Zebra Finch** *Taeniopygia guttata* Krützfeldt, N. O., Logerot, P., Kubke, M. F., & Wild, J. M. (2010). Connections of the auditory brainstem in a songbird, Taeniopygia guttata. II. Projections of nucleus angularis and nucleus laminaris to the superior olive and lateral lemniscal nuclei. The Journal of comparative neurology, 518(11), 2135-2148. https://doi.org/10.1002/cne.22324 Sex: Not Reporte…
NL	MLd	Zebra Finch	**Zebra Finch** *Taeniopygia guttata* Krützfeldt, N. O., Logerot, P., Kubke, M. F., & Wild, J. M. (2010). Connections of the auditory brainstem in a songbird, Taeniopygia guttata. I. Projections of nucleus angularis and nucleus laminaris to the auditory torus. The Journal of comparative neurology, 518(11), 2109-2134. https://doi.org/10.1002/cne.22334 Sex: Males Age: Adult (>P100) Method: BDA (10k…
NL	SO	Zebra Finch	**Zebra Finch** *Taeniopygia guttata* Krützfeldt, N. O., Logerot, P., Kubke, M. F., & Wild, J. M. (2010). Connections of the auditory brainstem in a songbird, Taeniopygia guttata. II. Projections of nucleus angularis and nucleus laminaris to the superior olive and lateral lemniscal nuclei. The Journal of comparative neurology, 518(11), 2135-2148. https://doi.org/10.1002/cne.22324 Sex: Not Reporte…
NL	LLI	Zebra Finch	**Zebra Finch** *Taeniopygia guttata* Krützfeldt, N. O., Logerot, P., Kubke, M. F., & Wild, J. M. (2010). Connections of the auditory brainstem in a songbird, Taeniopygia guttata. II. Projections of nucleus angularis and nucleus laminaris to the superior olive and lateral lemniscal nuclei. The Journal of comparative neurology, 518(11), 2135-2148. https://doi.org/10.1002/cne.22324 Sex: Not Reporte…
NM	PAm	Zebra Finch	**Zebra Finch** *Taeniopygia guttata* Reinke, H. and Wild, J.M. (1998), Identification and connections of inspiratory premotor neurons in songbirds and budgerigar. J. Comp. Neurol., 391: 147-163. https://doi.org/10.1002/(SICI)1096-9861(19980209)391:2<147::AID-CNE1>3.0.CO;2-2 Sex: Male Age: Not Reported Method: BDA (10kDa)
NM	LLV	Zebra Finch	**Zebra Finch** *Taeniopygia guttata* Wild, J. M., Krützfeldt, N. O., & Kubke, M. F. (2009). Afferents to the cochlear nuclei and nucleus laminaris from the ventral nucleus of the lateral lemniscus in the zebra finch (Taeniopygia guttata). Hearing research, 257(1-2), 1-7. https://doi.org/10.1016/j.heares.2009.07.007 Sex: Males Age: Adult (>P100) Method: BDA, CTB, or Fast Blue
NM	NL	Zebra Finch	**Zebra Finch** *Taeniopygia guttata* Krützfeldt, N. O., Logerot, P., Kubke, M. F., & Wild, J. M. (2010). Connections of the auditory brainstem in a songbird, Taeniopygia guttata. I. Projections of nucleus angularis and nucleus laminaris to the auditory torus. The Journal of comparative neurology, 518(11), 2109-2134. https://doi.org/10.1002/cne.22334 Sex: Males Age: Adult (>P100) Method: BDA (10k…
NR	Expiratory Muscles	Zebra Finch	**Zebra Finch** *Taeniopygia guttata* Wild, J. M., Li, D., & Eagleton, C. (1997). Projections of the dorsomedial nucleus of the intercollicular complex (DM) in relation to respiratory-vocal nuclei in the brainstem of pigeon (Columba livia) and zebra finch (Taeniopygia guttata). The Journal of comparative neurology, 377(3), 392-413. https://doi.org/10.1002/(sici)1096-9861(19970120)377:3<392::aid-c…
NR	HA (Rostral)	Zebra Finch	**Zebra Finch** *Taeniopygia guttata* Wild, J. M., & Williams, M. N. (2000). Rostral wulst in passerine birds. I. Origin, course, and terminations of an avian pyramidal tract. The Journal of comparative neurology, 416(4), 429-450. https://doi.org/10.1002/(SICI)1096-9861(20000124)416:4<429::AID-CNE2>3.0.CO;2-X Sex: Not Reported Age: Not Reported Method: BDA (10kDa) or CTB
nTOv	Ov (Shell)	Non-Zebra Finch	**Bengalese Finch** *Lonchura striata domestica* Zeng, S., Zhang, X., Peng, W., & Zuo, M. (2004). Immunohistochemistry and neural connectivity of the Ov shell in the songbird and their evolutionary implications. The Journal of comparative neurology, 470(2), 192-209. https://doi.org/10.1002/cne.11042 Sex: Undetermined Age: Adult Method: BDA (3kDa)
nTOv	Ov (Core)	Zebra Finch	**Zebra Finch** *Taeniopygia guttata* Vates, G. E., Broome, B. M., Mello, C. V., & Nottebohm, F. (1996). Auditory pathways of caudal telencephalon and their relation to the song system of adult male zebra finches. The Journal of comparative neurology, 366(4), 613-642. https://doi.org/10.1002/(SICI)1096-9861(19960318)366:4<613::AID-CNE5>3.0.CO;2-7 Sex: Males Age: Adult (>P120) Method: BDA (3kDa) o…
nTOv	NCM	Zebra Finch	**Zebra Finch** *Taeniopygia guttata* Katic, J., Morohashi, Y., & Yazaki-Sugiyama, Y. (2022). Neural circuit for social authentication in song learning. Nature communications, 13(1), 4442. https://doi.org/10.1038/s41467-022-32207-1 Sex: Males Age: Juvenile (~58-65 dph) Method: CTB --- **Zebra Finch** *Taeniopygia guttata* Vates, G. E., Broome, B. M., Mello, C. V., & Nottebohm, F. (1996). Auditory…
nTOv	PL	Zebra Finch	**Zebra Finch** *Taeniopygia guttata* Wild, J. M., & Gaede, A. H. (2016). Second tectofugal pathway in a songbird *Taeniopygia guttata) revisited: Tectal and lateral pontine projections to the posterior thalamus, thence to the intermediate nidopallium. The Journal of comparative neurology, 524(5), 963-985. https://doi.org/10.1002/cne.23886 Sex: Undetermined Age: Adult (>P100) Method: BDA
nTOv	GP	Zebra Finch	**Zebra Finch** *Taeniopygia guttata* Wild J. M. (2017). Dorsal pallidal neurons directly link the nidopallium and midbrain in the zebra finch (Taeniopygia guttata). The Journal of comparative neurology, 525(7), 1731-1742. https://doi.org/10.1002/cne.24174 Sex: Undetermined Age: Adult Method: retrograde and anterograde tracing with BDA and CTB
nTOv	L1	Zebra Finch	**Zebra Finch** *Taeniopygia guttata* Vates, G. E., Broome, B. M., Mello, C. V., & Nottebohm, F. (1996). Auditory pathways of caudal telencephalon and their relation to the song system of adult male zebra finches. The Journal of comparative neurology, 366(4), 613-642. https://doi.org/10.1002/(SICI)1096-9861(19960318)366:4<613::AID-CNE5>3.0.CO;2-7 Sex: Males Age: Adult (>P120) Method: BDA (3kDa) o…
nTOv	VMH	Zebra Finch	**Zebra Finch** *Taeniopygia guttata* Wild J. M. (2017). The ventromedial hypothalamic nucleus in the zebra finch *Taeniopygia guttata): Afferent and efferent projections in relation to the control of reproductive behavior. The Journal of comparative neurology, 525(12), 2657-2676. https://doi.org/10.1002/cne.24225 Sex: Males and Females Age: Adult Method: BDA; CTB
nTOv	L3	Zebra Finch	**Zebra Finch** *Taeniopygia guttata* Vates, G. E., Broome, B. M., Mello, C. V., & Nottebohm, F. (1996). Auditory pathways of caudal telencephalon and their relation to the song system of adult male zebra finches. The Journal of comparative neurology, 366(4), 613-642. https://doi.org/10.1002/(SICI)1096-9861(19960318)366:4<613::AID-CNE5>3.0.CO;2-7 Sex: Males Age: Adult (>P120) Method: BDA (3kDa) o…
nTS	PBvl	Zebra Finch	**Zebra Finch** *Taeniopygia guttata* Reinke, H. and Wild, J.M. (1998), Identification and connections of inspiratory premotor neurons in songbirds and budgerigar. J. Comp. Neurol., 391: 147-163. https://doi.org/10.1002/(SICI)1096-9861(19980209)391:2<147::AID-CNE1>3.0.CO;2-2 Sex: Male Age: Not Reported Method: BDA (10kDa)
nTS	Expiratory Muscles	Zebra Finch	**Zebra Finch** *Taeniopygia guttata* Wild, J. M., Li, D., & Eagleton, C. (1997). Projections of the dorsomedial nucleus of the intercollicular complex (DM) in relation to respiratory-vocal nuclei in the brainstem of pigeon (Columba livia) and zebra finch (Taeniopygia guttata). The Journal of comparative neurology, 377(3), 392-413. https://doi.org/10.1002/(sici)1096-9861(19970120)377:3<392::aid-c…
nTS	PAm	Zebra Finch	**Zebra Finch** *Taeniopygia guttata* Reinke, H. and Wild, J.M. (1998), Identification and connections of inspiratory premotor neurons in songbirds and budgerigar. J. Comp. Neurol., 391: 147-163. https://doi.org/10.1002/(SICI)1096-9861(19980209)391:2<147::AID-CNE1>3.0.CO;2-2 Sex: Not Reported Age: Not Reported Method: BDA and CTB --- **Zebra Finch** *Taeniopygia guttata* Wild, J. M., Kubke, M. F.…
nTS	RAm	Zebra Finch	**Zebra Finch** *Taeniopygia guttata* Wild, J. M., Kubke, M. F., & Mooney, R. (2009). Avian nucleus retroambigualis: cell types and projections to other respiratory-vocal nuclei in the brain of the zebra finch (Taeniopygia guttata). The Journal of comparative neurology, 512(6), 768-783. https://doi.org/10.1002/cne.21932 Sex: Males Age: Adult Method: BDA (10kDa)
nTTDc	G	Zebra Finch	**Zebra Finch** *Taeniopygia guttata* Faunes, M., & Wild, J. M. (2017). The ascending projections of the nuclei of the descending trigeminal tract (nTTD) in the zebra finch *Taeniopygia guttata). The Journal of comparative neurology, 525(13), 2832-2846. https://doi.org/10.1002/cne.24247 Sex: Undetermined Age: Adult Method: retrograde tracer BDA or CTB
nTTDc	RAm	Zebra Finch	**Zebra Finch** *Taeniopygia guttata* Wild, J. M., Kubke, M. F., & Mooney, R. (2009). Avian nucleus retroambigualis: cell types and projections to other respiratory-vocal nuclei in the brain of the zebra finch (Taeniopygia guttata). The Journal of comparative neurology, 512(6), 768-783. https://doi.org/10.1002/cne.21932 Sex: Males Age: Adult Method: BDA (10kDa)
nTTDc	PrV	Zebra Finch	**Zebra Finch** *Taeniopygia guttata* Faunes, M., & Wild, J. M. (2017). The ascending projections of the nuclei of the descending trigeminal tract (nTTD) in the zebra finch *Taeniopygia guttata). The Journal of comparative neurology, 525(13), 2832-2846. https://doi.org/10.1002/cne.24247 Sex: Undetermined Age: Adult Method: retrograde tracer BDA or CTB
nTTDc	sP	Zebra Finch	**Zebra Finch** *Taeniopygia guttata* Faunes, M., & Wild, J. M. (2017). The ascending projections of the nuclei of the descending trigeminal tract (nTTD) in the zebra finch *Taeniopygia guttata). The Journal of comparative neurology, 525(13), 2832-2846. https://doi.org/10.1002/cne.24247 Sex: Undetermined Age: Adult Method: retrograde tracer BDA or CTB
nTTDc	PAm	Zebra Finch	**Zebra Finch** *Taeniopygia guttata* Reinke, H. and Wild, J.M. (1998), Identification and connections of inspiratory premotor neurons in songbirds and budgerigar. J. Comp. Neurol., 391: 147-163. https://doi.org/10.1002/(SICI)1096-9861(19980209)391:2<147::AID-CNE1>3.0.CO;2-2 Sex: Male Age: Not Reported Method: BDA (10kDa)
nTTDc	LLI	Zebra Finch	**Zebra Finch** *Taeniopygia guttata* Faunes, M., & Wild, J. M. (2017). The ascending projections of the nuclei of the descending trigeminal tract (nTTD) in the zebra finch *Taeniopygia guttata). The Journal of comparative neurology, 525(13), 2832-2846. https://doi.org/10.1002/cne.24247 Sex: Undetermined Age: Adult Method: retrograde tracer BDA or CTB
nTTDc	VeM	Zebra Finch	**Zebra Finch** *Taeniopygia guttata* Faunes, M., & Wild, J. M. (2017). The ascending projections of the nuclei of the descending trigeminal tract (nTTD) in the zebra finch *Taeniopygia guttata). The Journal of comparative neurology, 525(13), 2832-2846. https://doi.org/10.1002/cne.24247 Sex: Undetermined Age: Adult Method: retrograde tracer BDA or CTB
nTTDc	ICo	Zebra Finch	**Zebra Finch** *Taeniopygia guttata* Faunes, M., & Wild, J. M. (2017). The ascending projections of the nuclei of the descending trigeminal tract (nTTD) in the zebra finch *Taeniopygia guttata). The Journal of comparative neurology, 525(13), 2832-2846. https://doi.org/10.1002/cne.24247 Sex: Undetermined Age: Adult Method: retrograde tracer BDA or CTB
nTTDc	nTTDo	Zebra Finch	**Zebra Finch** *Taeniopygia guttata* Faunes, M., & Wild, J. M. (2017). The ascending projections of the nuclei of the descending trigeminal tract (nTTD) in the zebra finch *Taeniopygia guttata). The Journal of comparative neurology, 525(13), 2832-2846. https://doi.org/10.1002/cne.24247 Sex: Males and Females Age: Adult Method: retrograde tracer BDA or CTB
nTTDc	nTTDi	Zebra Finch	**Zebra Finch** *Taeniopygia guttata* Faunes, M., & Wild, J. M. (2017). The ascending projections of the nuclei of the descending trigeminal tract (nTTD) in the zebra finch *Taeniopygia guttata). The Journal of comparative neurology, 525(13), 2832-2846. https://doi.org/10.1002/cne.24247 Sex: Undetermined Age: Adult Method: retrograde tracer BDA or CTB
nTTDc	SO	Zebra Finch	**Zebra Finch** *Taeniopygia guttata* Faunes, M., & Wild, J. M. (2017). The ascending projections of the nuclei of the descending trigeminal tract (nTTD) in the zebra finch *Taeniopygia guttata). The Journal of comparative neurology, 525(13), 2832-2846. https://doi.org/10.1002/cne.24247 Sex: Undetermined Age: Adult Method: retrograde tracer BDA or CTB
nTTDc	IO	Zebra Finch	**Zebra Finch** *Taeniopygia guttata* Faunes, M., & Wild, J. M. (2017). The ascending projections of the nuclei of the descending trigeminal tract (nTTD) in the zebra finch *Taeniopygia guttata). The Journal of comparative neurology, 525(13), 2832-2846. https://doi.org/10.1002/cne.24247 Sex: Undetermined Age: Adult Method: retrograde tracer BDA or CTB
nTTDc	Cu	Zebra Finch	**Zebra Finch** *Taeniopygia guttata* Faunes, M., & Wild, J. M. (2017). The ascending projections of the nuclei of the descending trigeminal tract (nTTD) in the zebra finch *Taeniopygia guttata). The Journal of comparative neurology, 525(13), 2832-2846. https://doi.org/10.1002/cne.24247 Sex: Undetermined Age: Adult Method: retrograde tracer BDA or CTB
nTTDc	DIVA	Zebra Finch	**Zebra Finch** *Taeniopygia guttata* Faunes, M., & Wild, J. M. (2017). The ascending projections of the nuclei of the descending trigeminal tract (nTTD) in the zebra finch *Taeniopygia guttata). The Journal of comparative neurology, 525(13), 2832-2846. https://doi.org/10.1002/cne.24247 Sex: Undetermined Age: Adult Method: retrograde tracer BDA or CTB
nTTDi	MVIId	Zebra Finch|Non-Zebra Finch	**Zebra Finch** *Taeniopygia guttata* Wild, J. M., & Krützfeldt, N. E. (2012). Trigeminal and telencephalic projections to jaw and other upper vocal tract premotor neurons in songbirds: sensorimotor circuitry for beak movements during singing. The Journal of comparative neurology, 520(3), 590-605. https://doi.org/10.1002/cne.22752 Sex: Males Age: Adult Method: CTB, BDA (10kDa) --- **Canary** *Ser…
nTTDi	SO	Zebra Finch	**Zebra Finch** *Taeniopygia guttata* Faunes, M., & Wild, J. M. (2017). The ascending projections of the nuclei of the descending trigeminal tract (nTTD) in the zebra finch *Taeniopygia guttata). The Journal of comparative neurology, 525(13), 2832-2846. https://doi.org/10.1002/cne.24247 Sex: Undetermined Age: Adult Method: retrograde tracer BDA or CTB
nTTDi	IO	Zebra Finch	**Zebra Finch** *Taeniopygia guttata* Faunes, M., & Wild, J. M. (2017). The ascending projections of the nuclei of the descending trigeminal tract (nTTD) in the zebra finch *Taeniopygia guttata). The Journal of comparative neurology, 525(13), 2832-2846. https://doi.org/10.1002/cne.24247 Sex: Undetermined Age: Adult Method: retrograde tracer BDA or CTB
nTTDi	DIVA	Zebra Finch	**Zebra Finch** *Taeniopygia guttata* Faunes, M., & Wild, J. M. (2017). The ascending projections of the nuclei of the descending trigeminal tract (nTTD) in the zebra finch *Taeniopygia guttata). The Journal of comparative neurology, 525(13), 2832-2846. https://doi.org/10.1002/cne.24247 Sex: Undetermined Age: Adult Method: retrograde tracer BDA or CTB
nTTDi	PrV	Zebra Finch	**Zebra Finch** *Taeniopygia guttata* Faunes, M., & Wild, J. M. (2017). The ascending projections of the nuclei of the descending trigeminal tract (nTTD) in the zebra finch *Taeniopygia guttata). The Journal of comparative neurology, 525(13), 2832-2846. https://doi.org/10.1002/cne.24247 Sex: Undetermined Age: Adult Method: retrograde tracer BDA or CTB
nTTDi	nTTDo	Zebra Finch	**Zebra Finch** *Taeniopygia guttata* Faunes, M., & Wild, J. M. (2017). The ascending projections of the nuclei of the descending trigeminal tract (nTTD) in the zebra finch *Taeniopygia guttata). The Journal of comparative neurology, 525(13), 2832-2846. https://doi.org/10.1002/cne.24247 Sex: Undetermined Age: Adult Method: retrograde tracer BDA or CTB
nTTDi	G	Zebra Finch	**Zebra Finch** *Taeniopygia guttata* Faunes, M., & Wild, J. M. (2017). The ascending projections of the nuclei of the descending trigeminal tract (nTTD) in the zebra finch *Taeniopygia guttata). The Journal of comparative neurology, 525(13), 2832-2846. https://doi.org/10.1002/cne.24247 Sex: Undetermined Age: Adult Method: retrograde tracer BDA or CTB
nTTDi	Cu	Zebra Finch	**Zebra Finch** *Taeniopygia guttata* Faunes, M., & Wild, J. M. (2017). The ascending projections of the nuclei of the descending trigeminal tract (nTTD) in the zebra finch *Taeniopygia guttata). The Journal of comparative neurology, 525(13), 2832-2846. https://doi.org/10.1002/cne.24247 Sex: Undetermined Age: Adult Method: retrograde tracer BDA or CTB
nTTDi	CuE	Zebra Finch	**Zebra Finch** *Taeniopygia guttata* Faunes, M., & Wild, J. M. (2017). The ascending projections of the nuclei of the descending trigeminal tract (nTTD) in the zebra finch *Taeniopygia guttata). The Journal of comparative neurology, 525(13), 2832-2846. https://doi.org/10.1002/cne.24247 Sex: Undetermined Age: Adult Method: retrograde tracer BDA or CTB
nTTDi	nTTDc	Zebra Finch	**Zebra Finch** *Taeniopygia guttata* Faunes, M., & Wild, J. M. (2017). The ascending projections of the nuclei of the descending trigeminal tract (nTTD) in the zebra finch *Taeniopygia guttata). The Journal of comparative neurology, 525(13), 2832-2846. https://doi.org/10.1002/cne.24247 Sex: Undetermined Age: Adult Method: retrograde tracer BDA or CTB
nTTDi	LLI	Zebra Finch	**Zebra Finch** *Taeniopygia guttata* Faunes, M., & Wild, J. M. (2017). The ascending projections of the nuclei of the descending trigeminal tract (nTTD) in the zebra finch *Taeniopygia guttata). The Journal of comparative neurology, 525(13), 2832-2846. https://doi.org/10.1002/cne.24247 Sex: Undetermined Age: Adult Method: retrograde tracer BDA or CTB
nTTDi	PAm	Zebra Finch	**Zebra Finch** *Taeniopygia guttata* Reinke, H. and Wild, J.M. (1998), Identification and connections of inspiratory premotor neurons in songbirds and budgerigar. J. Comp. Neurol., 391: 147-163. https://doi.org/10.1002/(SICI)1096-9861(19980209)391:2<147::AID-CNE1>3.0.CO;2-2 Sex: Male Age: Not Reported Method: BDA (10kDa)
nTTDi	Uva	Zebra Finch	**Zebra Finch** *Taeniopygia guttata* Faunes, M., & Wild, J. M. (2017). The ascending projections of the nuclei of the descending trigeminal tract (nTTD) in the zebra finch *Taeniopygia guttata). The Journal of comparative neurology, 525(13), 2832-2846. https://doi.org/10.1002/cne.24247 Sex: Undetermined Age: Adult Method: retrograde tracer BDA or CTB
nTTDi	VeM	Zebra Finch	**Zebra Finch** *Taeniopygia guttata* Faunes, M., & Wild, J. M. (2017). The ascending projections of the nuclei of the descending trigeminal tract (nTTD) in the zebra finch *Taeniopygia guttata). The Journal of comparative neurology, 525(13), 2832-2846. https://doi.org/10.1002/cne.24247 Sex: Undetermined Age: Adult Method: retrograde tracer BDA or CTB
nTTDi	ICo	Zebra Finch	**Zebra Finch** *Taeniopygia guttata* Faunes, M., & Wild, J. M. (2017). The ascending projections of the nuclei of the descending trigeminal tract (nTTD) in the zebra finch *Taeniopygia guttata). The Journal of comparative neurology, 525(13), 2832-2846. https://doi.org/10.1002/cne.24247 Sex: Undetermined Age: Adult Method: retrograde tracer BDA or CTB
nTTDo	CuE	Zebra Finch	**Zebra Finch** *Taeniopygia guttata* Faunes, M., & Wild, J. M. (2017). The ascending projections of the nuclei of the descending trigeminal tract (nTTD) in the zebra finch *Taeniopygia guttata). The Journal of comparative neurology, 525(13), 2832-2846. https://doi.org/10.1002/cne.24247 Sex: Undetermined Age: Adult Method: retrograde tracer BDA or CTB
nTTDo	ICo	Zebra Finch	**Zebra Finch** *Taeniopygia guttata* Faunes, M., & Wild, J. M. (2017). The ascending projections of the nuclei of the descending trigeminal tract (nTTD) in the zebra finch *Taeniopygia guttata). The Journal of comparative neurology, 525(13), 2832-2846. https://doi.org/10.1002/cne.24247 Sex: Undetermined Age: Adult Method: retrograde tracer BDA or CTB
nTTDo	DIVA	Zebra Finch	**Zebra Finch** *Taeniopygia guttata* Faunes, M., & Wild, J. M. (2017). The ascending projections of the nuclei of the descending trigeminal tract (nTTD) in the zebra finch (Taeniopygia guttata). The Journal of comparative neurology, 525(13), 2832-2846. https://doi.org/10.1002/cne.24247 Sex: Undetermined Age: Adult Method: retrograde tracer BDA or CTB
nTTDo	LLI	Zebra Finch	**Zebra Finch** *Taeniopygia guttata* Faunes, M., & Wild, J. M. (2017). The ascending projections of the nuclei of the descending trigeminal tract (nTTD) in the zebra finch *Taeniopygia guttata). The Journal of comparative neurology, 525(13), 2832-2846. https://doi.org/10.1002/cne.24247 Sex: Undetermined Age: Adult Method: retrograde tracer BDA or CTB
nTTDo	Cu	Zebra Finch	**Zebra Finch** *Taeniopygia guttata* Faunes, M., & Wild, J. M. (2017). The ascending projections of the nuclei of the descending trigeminal tract (nTTD) in the zebra finch *Taeniopygia guttata). The Journal of comparative neurology, 525(13), 2832-2846. https://doi.org/10.1002/cne.24247 Sex: Undetermined Age: Adult Method: retrograde tracer BDA or CTB
nTTDo	PrV	Zebra Finch	**Zebra Finch** *Taeniopygia guttata* Faunes, M., & Wild, J. M. (2017). The ascending projections of the nuclei of the descending trigeminal tract (nTTD) in the zebra finch *Taeniopygia guttata). The Journal of comparative neurology, 525(13), 2832-2846. https://doi.org/10.1002/cne.24247 Sex: Undetermined Age: Adult Method: retrograde tracer BDA or CTB
nTTDo	Uva	Zebra Finch	**Zebra Finch** *Taeniopygia guttata* Faunes, M., & Wild, J. M. (2017). The ascending projections of the nuclei of the descending trigeminal tract (nTTD) in the zebra finch *Taeniopygia guttata). The Journal of comparative neurology, 525(13), 2832-2846. https://doi.org/10.1002/cne.24247 Sex: Undetermined Age: Adult Method: retrograde tracer BDA or CTB
nTTDo	SO	Zebra Finch	**Zebra Finch** *Taeniopygia guttata* Faunes, M., & Wild, J. M. (2017). The ascending projections of the nuclei of the descending trigeminal tract (nTTD) in the zebra finch *Taeniopygia guttata). The Journal of comparative neurology, 525(13), 2832-2846. https://doi.org/10.1002/cne.24247 Sex: Undetermined Age: Adult Method: retrograde tracer BDA or CTB
nTTDo	G	Zebra Finch	**Zebra Finch** *Taeniopygia guttata* Faunes, M., & Wild, J. M. (2017). The ascending projections of the nuclei of the descending trigeminal tract (nTTD) in the zebra finch *Taeniopygia guttata). The Journal of comparative neurology, 525(13), 2832-2846. https://doi.org/10.1002/cne.24247 Sex: Undetermined Age: Adult Method: retrograde tracer BDA or CTB
nTTDo	nTTDc	Zebra Finch	**Zebra Finch** *Taeniopygia guttata* Faunes, M., & Wild, J. M. (2017). The ascending projections of the nuclei of the descending trigeminal tract (nTTD) in the zebra finch *Taeniopygia guttata). The Journal of comparative neurology, 525(13), 2832-2846. https://doi.org/10.1002/cne.24247 Sex: Undetermined Age: Adult Method: retrograde tracer BDA or CTB
nTTDo	IO	Zebra Finch	**Zebra Finch** *Taeniopygia guttata* Faunes, M., & Wild, J. M. (2017). The ascending projections of the nuclei of the descending trigeminal tract (nTTD) in the zebra finch *Taeniopygia guttata). The Journal of comparative neurology, 525(13), 2832-2846. https://doi.org/10.1002/cne.24247 Sex: Undetermined Age: Adult Method: retrograde tracer BDA or CTB
nX	Air Sacs	Zebra Finch	**Zebra Finch** *Taeniopygia guttata* Kubke, M. F., Ross, J. M., & Wild, J. M. (2004). Vagal innervation of the air sacs in a songbird, Taenopygia guttata. Journal of anatomy, 204(4), 283-292. https://doi.org/10.1111/j.0021-8782.2004.00286.x Sex: Not Reported Age: Not Reported Method: CTB
nX	Tongue	Zebra Finch	**Zebra Finch** *Taeniopygia guttata* Wild J. M. (1990). Peripheral and central terminations of hypoglossal afferents innervating lingual tactile mechanoreceptor complexes in Fringillidae. The Journal of comparative neurology, 298(2), 157-171. https://doi.org/10.1002/cne.902980203 Sex: Not Reported Age: Not Reported Method: CTB-HRP
nXII(l)	MV	Zebra Finch|Non-Zebra Finch	**Zebra Finch** *Taeniopygia guttata* Wild, J. M., & Krützfeldt, N. E. (2012). Trigeminal and telencephalic projections to jaw and other upper vocal tract premotor neurons in songbirds: sensorimotor circuitry for beak movements during singing. The Journal of comparative neurology, 520(3), 590-605. https://doi.org/10.1002/cne.22752 Sex: Males Age: Adult Method: CTB, BDA (10kDa) --- **Canary** *Ser…
nXII(l)	Tongue	Zebra Finch	**Zebra Finch** *Taeniopygia guttata* Wild J. M. (1990). Peripheral and central terminations of hypoglossal afferents innervating lingual tactile mechanoreceptor complexes in Fringillidae. The Journal of comparative neurology, 298(2), 157-171. https://doi.org/10.1002/cne.902980203 Sex: Not Reported Age: Not Reported Method: CTB-HRP
nXII(ts)	RAm	Zebra Finch	**Zebra Finch** *Taeniopygia guttata* Wild, J. M., Kubke, M. F., & Mooney, R. (2009). Avian nucleus retroambigualis: cell types and projections to other respiratory-vocal nuclei in the brain of the zebra finch (Taeniopygia guttata). The Journal of comparative neurology, 512(6), 768-783. https://doi.org/10.1002/cne.21932 Sex: Males Age: Adult Method: BDA (10kDa)
nXII(ts)	PAm	Zebra Finch	**Zebra Finch** *Taeniopygia guttata* Reinke, H. and Wild, J.M. (1998), Identification and connections of inspiratory premotor neurons in songbirds and budgerigar. J. Comp. Neurol., 391: 147-163. https://doi.org/10.1002/(SICI)1096-9861(19980209)391:2<147::AID-CNE1>3.0.CO;2-2 Sex: Male Age: Not Reported Method: BDA (10kDa)
nXII(ts)	Syrinx	Zebra Finch	**Zebra Finch** *Taeniopygia guttata* Faunes, M., Botelho, J. F., & Wild, J. M. (2017). Innervation of the syrinx of the zebra finch (Taeniopygia guttata). The Journal of comparative neurology, 525(13), 2847-2860. https://doi.org/10.1002/cne.24236 Sex: Males Age: Adult Method: CTB
nXII(ts)	nTS	Zebra Finch	**Zebra Finch** *Taeniopygia guttata* Wild, J. M., Kubke, M. F., & Mooney, R. (2009). Avian nucleus retroambigualis: cell types and projections to other respiratory-vocal nuclei in the brain of the zebra finch (Taeniopygia guttata). The Journal of comparative neurology, 512(6), 768-783. https://doi.org/10.1002/cne.21932 Sex: Males Age: Adult Method: BDA (10kDa)
OCb	DCN	Zebra Finch	**Zebra Finch** *Taeniopygia guttata* Pidoux, L., Le Blanc, P., Levenes, C., & Leblois, A. (2018). A subcortical circuit linking the cerebellum to the basal ganglia engaged in vocal learning. eLife, 7, e32167. https://doi.org/10.7554/eLife.32167 Sex: Males Age: Adult (>P90) Method: fluorescent dextrans; CTB
OT	FRL	Zebra Finch	**Zebra Finch** *Taeniopygia guttata* Bischof, HJ., Niemann, J. (1990). Contralateral projections of the optic tectum in the zebra finch *Taenopygia guttata castanotis). Cell and Tissue Research, 262, 307-313. https://doi.org/10.1007/BF00309886 Sex: Males Age: Adult Method: proline --- **Zebra Finch** *Taeniopygia guttata* Gaede, A. H., Gutiérrez-Ibáñez, C., Wu, P. H., Pilon, M. C., Altshuler, D.…
OT	DMP	Zebra Finch	**Zebra Finch** *Taeniopygia guttata* Foster, E. F., Mehta, R. P., & Bottjer, S. W. (1997). Axonal connections of the medial magnocellular nucleus of the anterior neostriatum in zebra finches. The Journal of comparative neurology, 382(3), 364-381. https://doi.org/10.1002/cne.903820305 Sex: Males Age: Adult Method: DiI
OT	Uva	Zebra Finch|Non-Zebra Finch	**Zebra Finch** *Taeniopygia guttata* Coleman, M. J., Roy, A., Wild, J. M., & Mooney, R. (2007). Thalamic gating of auditory responses in telencephalic song control nuclei. The Journal of neuroscience : the official journal of the Society for Neuroscience, 27(37), 10024-10036. https://doi.org/10.1523/JNEUROSCI.2215-07.2007 Sex: Males Age: Adult (>P120) Method: CTB --- **Zebra Finch** *Taeniopygia…
OT	PT	Zebra Finch	**Zebra Finch** *Taeniopygia guttata* Bischof, HJ., Niemann, J. (1990). Contralateral projections of the optic tectum in the zebra finch *Taenopygia guttata castanotis). Cell and Tissue Research, 262, 307-313. https://doi.org/10.1007/BF00309886 Sex: Males Age: Adult Method: proline
OT	Rt	Zebra Finch	**Zebra Finch** *Taeniopygia guttata* Bischof, HJ., Niemann, J. (1990). Contralateral projections of the optic tectum in the zebra finch *Taenopygia guttata castanotis). Cell and Tissue Research, 262, 307-313. https://doi.org/10.1007/BF00309886 Sex: Males Age: Adult Method: proline, RITC, HRP --- **Zebra Finch** *Taeniopygia guttata* Gaede, A. H., Gutiérrez-Ibáñez, C., Wu, P. H., Pilon, M. C., Al…
OT	VbC	Zebra Finch|Non-Zebra Finch	**Zebra Finch** *Taeniopygia guttata* Gaede, A. H., Gutierrez-Ibanez, C., Armstrong, M. S., Altshuler, D. L., & Wylie, D. R. (2019). Pretectal projections to the oculomotor cerebellum in hummingbirds (Calypte anna), zebra finches *Taeniopygia guttata), and pigeons (Columba livia). The Journal of comparative neurology, 527(16), 2644-2658. https://doi.org/10.1002/cne.24697 Sex: Males Age: Adult Met…
OT	RPgc	Zebra Finch	**Zebra Finch** *Taeniopygia guttata* Bischof, HJ., Niemann, J. (1990). Contralateral projections of the optic tectum in the zebra finch *Taenopygia guttata castanotis). Cell and Tissue Research, 262, 307-313. https://doi.org/10.1007/BF00309886 Sex: Males Age: Adult Method: proline
OT	EM	Zebra Finch	**Zebra Finch** *Taeniopygia guttata* Bischof, HJ., Niemann, J. (1990). Contralateral projections of the optic tectum in the zebra finch *Taenopygia guttata castanotis). Cell and Tissue Research, 262, 307-313. https://doi.org/10.1007/BF00309886 Sex: Males Age: Adult Method: proline
OT	IPS	Zebra Finch	**Zebra Finch** *Taeniopygia guttata* Bischof, HJ., Niemann, J. (1990). Contralateral projections of the optic tectum in the zebra finch *Taenopygia guttata castanotis). Cell and Tissue Research, 262, 307-313. https://doi.org/10.1007/BF00309886 Sex: Males Age: Adult Method: proline
OT	ICo	Zebra Finch	**Zebra Finch** *Taeniopygia guttata* Bischof, HJ., Niemann, J. (1990). Contralateral projections of the optic tectum in the zebra finch *Taenopygia guttata castanotis). Cell and Tissue Research, 262, 307-313. https://doi.org/10.1007/BF00309886 Sex: Males Age: Adult Method: proline
OT	DLL	Zebra Finch	**Zebra Finch** *Taeniopygia guttata* Bischof, HJ., Niemann, J. (1990). Contralateral projections of the optic tectum in the zebra finch *Taenopygia guttata castanotis). Cell and Tissue Research, 262, 307-313. https://doi.org/10.1007/BF00309886 Sex: Males Age: Adult Method: proline
OT	GLv	Zebra Finch	**Zebra Finch** *Taeniopygia guttata* Bischof, HJ., Niemann, J. (1990). Contralateral projections of the optic tectum in the zebra finch *Taenopygia guttata castanotis). Cell and Tissue Research, 262, 307-313. https://doi.org/10.1007/BF00309886 Sex: Males Age: Adult Method: proline --- **Zebra Finch** *Taeniopygia guttata* Gaede, A. H., Gutiérrez-Ibáñez, C., Wu, P. H., Pilon, M. C., Altshuler, D.…
OT	Ipc	Zebra Finch	**Zebra Finch** *Taeniopygia guttata* Bischof, HJ., Niemann, J. (1990). Contralateral projections of the optic tectum in the zebra finch *Taenopygia guttata castanotis). Cell and Tissue Research, 262, 307-313. https://doi.org/10.1007/BF00309886 Sex: Males Age: Adult Method: proline --- **Zebra Finch** *Taeniopygia guttata* Faunes, M., Fernández, S., Gutiérrez-Ibáñez, C., Iwaniuk, A. N., Wylie, D.…
OT	LM	Zebra Finch	**Zebra Finch** *Taeniopygia guttata* Bischof, HJ., Niemann, J. (1990). Contralateral projections of the optic tectum in the zebra finch *Taenopygia guttata castanotis). Cell and Tissue Research, 262, 307-313. https://doi.org/10.1007/BF00309886 Sex: Males Age: Adult Method: proline
OT	FRM	Zebra Finch	**Zebra Finch** *Taeniopygia guttata* Bischof, HJ., Niemann, J. (1990). Contralateral projections of the optic tectum in the zebra finch *Taenopygia guttata castanotis). Cell and Tissue Research, 262, 307-313. https://doi.org/10.1007/BF00309886 Sex: Males Age: Adult Method: proline
OT	PL	Zebra Finch	**Zebra Finch** *Taeniopygia guttata* Bischof, HJ., Niemann, J. (1990). Contralateral projections of the optic tectum in the zebra finch *Taenopygia guttata castanotis). Cell and Tissue Research, 262, 307-313. https://doi.org/10.1007/BF00309886 Sex: Males Age: Adult Method: proline --- **Zebra Finch** *Taeniopygia guttata* Gaede, A. H., Gutiérrez-Ibáñez, C., Wu, P. H., Pilon, M. C., Altshuler, D.…
OT	PM	Zebra Finch	**Zebra Finch** *Taeniopygia guttata* Bischof, HJ., Niemann, J. (1990). Contralateral projections of the optic tectum in the zebra finch *Taenopygia guttata castanotis). Cell and Tissue Research, 262, 307-313. https://doi.org/10.1007/BF00309886 Sex: Males Age: Adult Method: proline
OT	SPT	Zebra Finch	**Zebra Finch** *Taeniopygia guttata* Bischof, HJ., Niemann, J. (1990). Contralateral projections of the optic tectum in the zebra finch *Taenopygia guttata castanotis). Cell and Tissue Research, 262, 307-313. https://doi.org/10.1007/BF00309886 Sex: Males Age: Adult Method: proline
OT	Imc	Zebra Finch	**Zebra Finch** *Taeniopygia guttata* Bischof, HJ., Niemann, J. (1990). Contralateral projections of the optic tectum in the zebra finch *Taenopygia guttata castanotis). Cell and Tissue Research, 262, 307-313. https://doi.org/10.1007/BF00309886 Sex: Males Age: Adult Method: proline --- **Zebra Finch** *Taeniopygia guttata* Faunes, M., Fernández, S., Gutiérrez-Ibáñez, C., Iwaniuk, A. N., Wylie, D.…
OT	SRt	Zebra Finch	**Zebra Finch** *Taeniopygia guttata* Bischof, HJ., Niemann, J. (1990). Contralateral projections of the optic tectum in the zebra finch *Taenopygia guttata castanotis). Cell and Tissue Research, 262, 307-313. https://doi.org/10.1007/BF00309886 Sex: Males Age: Adult Method: proline
OT	LLV	Zebra Finch	**Zebra Finch** *Taeniopygia guttata* Gaede, A. H., Gutiérrez-Ibáñez, C., Wu, P. H., Pilon, M. C., Altshuler, D. L., & Wylie, D. R. (2024). Topography of visual and somatosensory inputs to the pontine nuclei in zebra finches *Taeniopygia guttata). The Journal of comparative neurology, 532(2), e25556. https://doi.org/10.1002/cne.25556 Sex: Males Age: Adult Method: anterograde tracing Texas red and…
OT	Slu	Zebra Finch	**Zebra Finch** *Taeniopygia guttata* Bischof, HJ., Niemann, J. (1990). Contralateral projections of the optic tectum in the zebra finch *Taenopygia guttata castanotis). Cell and Tissue Research, 262, 307-313. https://doi.org/10.1007/BF00309886 Sex: Males Age: Adult Method: proline
OT	ION	Zebra Finch	**Zebra Finch** *Taeniopygia guttata* Bischof, HJ., Niemann, J. (1990). Contralateral projections of the optic tectum in the zebra finch *Taenopygia guttata castanotis). Cell and Tissue Research, 262, 307-313. https://doi.org/10.1007/BF00309886 Sex: Males Age: Adult Method: proline
OT	CG	Zebra Finch	**Zebra Finch** *Taeniopygia guttata* Bischof, HJ., Niemann, J. (1990). Contralateral projections of the optic tectum in the zebra finch *Taenopygia guttata castanotis). Cell and Tissue Research, 262, 307-313. https://doi.org/10.1007/BF00309886 Sex: Males Age: Adult Method: proline
OT	DLP	Zebra Finch	**Zebra Finch** *Taeniopygia guttata* Bischof, HJ., Niemann, J. (1990). Contralateral projections of the optic tectum in the zebra finch *Taenopygia guttata castanotis). Cell and Tissue Research, 262, 307-313. https://doi.org/10.1007/BF00309886 Sex: Males Age: Adult Method: proline
Ov (Core)	NCL	Zebra Finch	**Zebra Finch** *Taeniopygia guttata* Fortune, E. S., & Margoliash, D. (1995). Parallel pathways and convergence onto HVc and adjacent neostriatum of adult zebra finches *Taeniopygia guttata). The Journal of comparative neurology, 360(3), 413-441. https://doi.org/10.1002/cne.903600305 Sex: Undetermined Age: Adult Method: BDA or fluor dextrans
Ov (Core)	VP	Zebra Finch	**Zebra Finch** *Taeniopygia guttata* Chen, R., Puzerey, P. A., Roeser, A. C., Riccelli, T. E., Podury, A., Maher, K., Farhang, A. R., & Goldberg, J. H. (2019). Songbird Ventral Pallidum Sends Diverse Performance Error Signals to Dopaminergic Midbrain. Neuron, 103(2), 266-276.e4. https://doi.org/10.1016/j.neuron.2019.04.038 Sex: Males Age: Adult Method: scAAV9 GFP --- **Zebra Finch** *Taeniopygia…
Ov (Core)	RA Cup	Zebra Finch	**Zebra Finch** *Taeniopygia guttata* Mello, C. V., Vates, G. E., Okuhata, S., & Nottebohm, F. (1998). Descending auditory pathways in the adult male zebra finch *Taeniopygia guttata*. The Journal of comparative neurology, 395(2), 137-160. https://doi.org/10.1002/(SICI)1096-9861(19980601)395:2<137::AID-CNE1>3.0.CO;2-3 Sex: Males Age: Adult (>P120) Method: rhodamine beads
Ov (Core)	NIf	Zebra Finch	**Zebra Finch** *Taeniopygia guttata* Wild J. M. (1994). Visual and somatosensory inputs to the avian song system via nucleus uvaeformis (Uva) and a comparison with the projections of a similar thalamic nucleus in a nonsongbird, Columba livia. The Journal of comparative neurology, 349(4), 512-535. https://doi.org/10.1002/cne.903490403 Sex: Not Reported Age: Not Reported Method: BDA
Ov (Core)	MLd	Zebra Finch	**Zebra Finch** *Taeniopygia guttata* Mello, C. V., Vates, G. E., Okuhata, S., & Nottebohm, F. (1998). Descending auditory pathways in the adult male zebra finch (Taeniopygia guttata). The Journal of comparative neurology, 395(2), 137-160. https://doi.org/10.1002/(SICI)1096-9861(19980601)395:2<137::AID-CNE1>3.0.CO;2-3 Sex: Males Age: Adult (>P120) Method: rhodamine beads --- **Zebra Finch** *Taen…
Ov (Core)	L2b	Zebra Finch	**Zebra Finch** *Taeniopygia guttata* Vates, G. E., Broome, B. M., Mello, C. V., & Nottebohm, F. (1996). Auditory pathways of caudal telencephalon and their relation to the song system of adult male zebra finches. The Journal of comparative neurology, 366(4), 613-642. https://doi.org/10.1002/(SICI)1096-9861(19960318)366:4<613::AID-CNE5>3.0.CO;2-7 Sex: Males Age: Adult (>P120) Method: BDA (3kDa) o…
Ov (Core)	L2a	Zebra Finch	**Zebra Finch** *Taeniopygia guttata* Vates, G. E., Broome, B. M., Mello, C. V., & Nottebohm, F. (1996). Auditory pathways of caudal telencephalon and their relation to the song system of adult male zebra finches. The Journal of comparative neurology, 366(4), 613-642. https://doi.org/10.1002/(SICI)1096-9861(19960318)366:4<613::AID-CNE5>3.0.CO;2-7 Sex: Males Age: Adult (>P120) Method: BDA (3kDa) o…
Ov (Core)	VMH	Zebra Finch	**Zebra Finch** *Taeniopygia guttata* Wild J. M. (2017). The ventromedial hypothalamic nucleus in the zebra finch *Taeniopygia guttata): Afferent and efferent projections in relation to the control of reproductive behavior. The Journal of comparative neurology, 525(12), 2657-2676. https://doi.org/10.1002/cne.24225 Sex: Males and Females Age: Adult Method: BDA; CTB Laterality: ipsilateral
Ov (Shell)	TnA	Non-Zebra Finch	**European Starling** *Sturnus vulgaris* Cheng, M., Chaiken, M., Zuo, M., & Miller, H. (1999). Nucleus taenia of the amygdala of birds: anatomical and functional studies in ring doves (Streptopelia risoria) and European Starlings (Sturnus vulgaris). Brain, behavior and evolution, 53(5-6), 243-270. https://doi.org/10.1159/000006597 Sex: Males Age: Adult (>P450) Method: FluoroGold
Ov (Shell)	AH	Non-Zebra Finch	**Bengalese Finch** *Lonchura striata domestica* Zeng, S., Zhang, X., Peng, W., & Zuo, M. (2004). Immunohistochemistry and neural connectivity of the Ov shell in the songbird and their evolutionary implications. The Journal of comparative neurology, 470(2), 192-209. https://doi.org/10.1002/cne.11042 Sex: Undetermined Age: Adult Method: Anterograde and retrograde tracing with 10% BDA,10% RDA, 2% C…
Ov (Shell)	CSt	Non-Zebra Finch	**Bengalese Finch** *Lonchura striata domestica* Zeng, S., Zhang, X., Peng, W., & Zuo, M. (2004). Immunohistochemistry and neural connectivity of the Ov shell in the songbird and their evolutionary implications. The Journal of comparative neurology, 470(2), 192-209. https://doi.org/10.1002/cne.11042 Sex: Undetermined Age: Adult Method: BDA (3kDa)
Ov (Shell)	L3	Zebra Finch|Non-Zebra Finch	**Zebra Finch** *Taeniopygia guttata* Vates, G. E., Broome, B. M., Mello, C. V., & Nottebohm, F. (1996). Auditory pathways of caudal telencephalon and their relation to the song system of adult male zebra finches. The Journal of comparative neurology, 366(4), 613-642. https://doi.org/10.1002/(SICI)1096-9861(19960318)366:4<613::AID-CNE5>3.0.CO;2-7 Sex: Males Age: Adult (>P120) Method: BDA (3kDa) o…
Ov (Shell)	LHy	Non-Zebra Finch	**Bengalese Finch** *Lonchura striata domestica* Zeng, S., Zhang, X., Peng, W., & Zuo, M. (2004). Immunohistochemistry and neural connectivity of the Ov shell in the songbird and their evolutionary implications. The Journal of comparative neurology, 470(2), 192-209. https://doi.org/10.1002/cne.11042 Sex: Undetermined Age: Adult Method: Anterograde and retrograde tracing with 10% BDA,10% RDA, 2% C…
Ov (Shell)	NCL	Zebra Finch	**Zebra Finch** *Taeniopygia guttata* Sadananda, M., Korte, S., & Bischof, H. J. (2007). Afferentation of a caudal forebrain area activated during courtship behavior: a tracing study in the zebra finch *Taeniopygia guttata). Brain research, 1184, 108-120. https://doi.org/10.1016/j.brainres.2007.09.040 Sex: Males Age: Adult Method: Rhodamine B-Isothiocyanate and Diamidino Yellow (Dihydrochloride);…
Ov (Shell)	GP	Zebra Finch|Non-Zebra Finch	**Zebra Finch** *Taeniopygia guttata* Wild J. M. (2017). Dorsal pallidal neurons directly link the nidopallium and midbrain in the zebra finch (Taeniopygia guttata). The Journal of comparative neurology, 525(7), 1731-1742. https://doi.org/10.1002/cne.24174 Sex: Undetermined Age: Adult Method: retrograde and anterograde tracing with BDA and CTB --- **Bengalese Finch** *Lonchura striata domestica* …
Ov (Shell)	LoC	Zebra Finch	**Zebra Finch** *Taeniopygia guttata* Katic, J., Morohashi, Y., & Yazaki-Sugiyama, Y. (2022). Neural circuit for social authentication in song learning. Nature communications, 13(1), 4442. https://doi.org/10.1038/s41467-022-32207-1 Sex: Males Age: Juvenile (~58-65 dph) Method: CTB
Ov (Shell)	nTOv	Non-Zebra Finch	**Bengalese Finch** *Lonchura striata domestica* Zeng, S., Zhang, X., Peng, W., & Zuo, M. (2004). Immunohistochemistry and neural connectivity of the Ov shell in the songbird and their evolutionary implications. The Journal of comparative neurology, 470(2), 192-209. https://doi.org/10.1002/cne.11042 Sex: Undetermined Age: Adult Method: BDA (3kDa)
Ov (Shell)	L2b	Zebra Finch|Non-Zebra Finch	**Zebra Finch** *Taeniopygia guttata* Vates, G. E., Broome, B. M., Mello, C. V., & Nottebohm, F. (1996). Auditory pathways of caudal telencephalon and their relation to the song system of adult male zebra finches. The Journal of comparative neurology, 366(4), 613-642. https://doi.org/10.1002/(SICI)1096-9861(19960318)366:4<613::AID-CNE5>3.0.CO;2-7 Sex: Males Age: Adult (>P120) Method: BDA (3kDa) o…
Ov (Shell)	CMM	Zebra Finch	**Zebra Finch** *Taeniopygia guttata* Vates, G. E., Broome, B. M., Mello, C. V., & Nottebohm, F. (1996). Auditory pathways of caudal telencephalon and their relation to the song system of adult male zebra finches. The Journal of comparative neurology, 366(4), 613-642. https://doi.org/10.1002/(SICI)1096-9861(19960318)366:4<613::AID-CNE5>3.0.CO;2-7 Sex: Males Age: Adult (>P120) Method: BDA (3kDa) o…
Ov (Shell)	NCM	Zebra Finch|Non-Zebra Finch	**Zebra Finch** *Taeniopygia guttata* Barr, H. J., Wall, E. M., & Woolley, S. C. (2021). Dopamine in the songbird auditory cortex shapes auditory preference. Current biology : CB, 31(20), 4547-4559.e5. https://doi.org/10.1016/j.cub.2021.08.005 Sex: Females Age: Adult Method: retrograde tracer Texas-red conjugated dextran --- **Zebra Finch** *Taeniopygia guttata* Katic, J., Morohashi, Y., & Yazaki…
Ov (Shell)	CLM	Zebra Finch|Non-Zebra Finch	**Zebra Finch** *Taeniopygia guttata* Vates, G. E., Broome, B. M., Mello, C. V., & Nottebohm, F. (1996). Auditory pathways of caudal telencephalon and their relation to the song system of adult male zebra finches. The Journal of comparative neurology, 366(4), 613-642. https://doi.org/10.1002/(SICI)1096-9861(19960318)366:4<613::AID-CNE5>3.0.CO;2-7 Sex: Males Age: Adult (>P120) Method: BDA (3kDa) o…
Ov (Shell)	POM	Non-Zebra Finch	**Bengalese Finch** *Lonchura striata domestica* Zeng, S., Zhang, X., Peng, W., & Zuo, M. (2004). Immunohistochemistry and neural connectivity of the Ov shell in the songbird and their evolutionary implications. The Journal of comparative neurology, 470(2), 192-209. https://doi.org/10.1002/cne.11042 Sex: Undetermined Age: Adult Method: BDA (3kDa)
Ov (Shell)	VMH	Non-Zebra Finch	**Bengalese Finch** *Lonchura striata domestica* Zeng, S., Zhang, X., Peng, W., & Zuo, M. (2004). Immunohistochemistry and neural connectivity of the Ov shell in the songbird and their evolutionary implications. The Journal of comparative neurology, 470(2), 192-209. https://doi.org/10.1002/cne.11042 Sex: Undetermined Age: Adult Method: Anterograde and retrograde tracing with 10% BDA,10% RDA, 2% C…
Ov (Shell)	L1	Zebra Finch|Non-Zebra Finch	**Zebra Finch** *Taeniopygia guttata* Vates, G. E., Broome, B. M., Mello, C. V., & Nottebohm, F. (1996). Auditory pathways of caudal telencephalon and their relation to the song system of adult male zebra finches. The Journal of comparative neurology, 366(4), 613-642. https://doi.org/10.1002/(SICI)1096-9861(19960318)366:4<613::AID-CNE5>3.0.CO;2-7 Sex: Males Age: Adult (>P120) Method: BDA (3kDa) o…
Ov (Shell)	VP	Zebra Finch	**Zebra Finch** *Taeniopygia guttata* Li, R., Zuo, M. X., & Sakaguchi, H. (1999). Auditory-vocal cholinergic pathway in zebra finch brain. Neuroreport, 10(1), 165-169. https://doi.org/10.1097/00001756-199901180-00032 Sex: Males Age: Adult Method: anterograde and retrograde tracer BDA; retrograde tracer fluoro-red
PAm	MV	Zebra Finch|Non-Zebra Finch	**Zebra Finch** *Taeniopygia guttata* Wild, J. M., & Krützfeldt, N. E. (2012). Trigeminal and telencephalic projections to jaw and other upper vocal tract premotor neurons in songbirds: sensorimotor circuitry for beak movements during singing. The Journal of comparative neurology, 520(3), 590-605. https://doi.org/10.1002/cne.22752 Sex: Males Age: Adult Method: CTB, BDA (10kDa) --- **Canary** *Ser…
PAm	nXII(ts)	Zebra Finch	**Zebra Finch** *Taeniopygia guttata* Reinke, H. and Wild, J.M. (1998), Identification and connections of inspiratory premotor neurons in songbirds and budgerigar. J. Comp. Neurol., 391: 147-163. https://doi.org/10.1002/(SICI)1096-9861(19980209)391:2<147::AID-CNE1>3.0.CO;2-2 Sex: Not Reported Age: Not Reported Method: BDA and CTB
PAm	Uva	Zebra Finch	**Zebra Finch** *Taeniopygia guttata* Reinke, H. and Wild, J.M. (1998), Identification and connections of inspiratory premotor neurons in songbirds and budgerigar. J. Comp. Neurol., 391: 147-163. https://doi.org/10.1002/(SICI)1096-9861(19980209)391:2<147::AID-CNE1>3.0.CO;2-2 Sex: Not Reported Age: Not Reported Method: BDA and CTB --- **Zebra Finch** *Taeniopygia guttata* Wild J. M. (1994). Visual…
PAm	PBvl	Zebra Finch	**Zebra Finch** *Taeniopygia guttata* Reinke, H. and Wild, J.M. (1998), Identification and connections of inspiratory premotor neurons in songbirds and budgerigar. J. Comp. Neurol., 391: 147-163. https://doi.org/10.1002/(SICI)1096-9861(19980209)391:2<147::AID-CNE1>3.0.CO;2-2 Sex: Not Reported Age: Not Reported Method: BDA and CTB
PAm	MVIId	Zebra Finch	**Zebra Finch** *Taeniopygia guttata* Reinke, H. and Wild, J.M. (1998), Identification and connections of inspiratory premotor neurons in songbirds and budgerigar. J. Comp. Neurol., 391: 147-163. https://doi.org/10.1002/(SICI)1096-9861(19980209)391:2<147::AID-CNE1>3.0.CO;2-2 Sex: Male Age: Not Reported Method: BDA (10kDa)
PAm	Inspiratory Muscles	Zebra Finch	**Zebra Finch** *Taeniopygia guttata* Reinke, H. and Wild, J.M. (1998), Identification and connections of inspiratory premotor neurons in songbirds and budgerigar. J. Comp. Neurol., 391: 147-163. https://doi.org/10.1002/(SICI)1096-9861(19980209)391:2<147::AID-CNE1>3.0.CO;2-2 Sex: Male Age: Not Reported Method: BDA (10kDa)
PAm	IOS	Zebra Finch	**Zebra Finch** *Taeniopygia guttata* Reinke, H. and Wild, J.M. (1998), Identification and connections of inspiratory premotor neurons in songbirds and budgerigar. J. Comp. Neurol., 391: 147-163. https://doi.org/10.1002/(SICI)1096-9861(19980209)391:2<147::AID-CNE1>3.0.CO;2-2 Sex: Not Reported Age: Not Reported Method: BDA and CTB
PAm	nTTDc	Zebra Finch	**Zebra Finch** *Taeniopygia guttata* Reinke, H. and Wild, J.M. (1998), Identification and connections of inspiratory premotor neurons in songbirds and budgerigar. J. Comp. Neurol., 391: 147-163. https://doi.org/10.1002/(SICI)1096-9861(19980209)391:2<147::AID-CNE1>3.0.CO;2-2 Sex: Male Age: Not Reported Method: BDA (10kDa)
PAm	RAm	Zebra Finch	**Zebra Finch** *Taeniopygia guttata* Reinke, H. and Wild, J.M. (1998), Identification and connections of inspiratory premotor neurons in songbirds and budgerigar. J. Comp. Neurol., 391: 147-163. https://doi.org/10.1002/(SICI)1096-9861(19980209)391:2<147::AID-CNE1>3.0.CO;2-2 Sex: Not Reported Age: Not Reported Method: BDA and CTB --- **Zebra Finch** *Taeniopygia guttata* Wild, J. M., Kubke, M. F.…
PAm	RVL	Zebra Finch	**Zebra Finch** *Taeniopygia guttata* Reinke, H. and Wild, J.M. (1998), Identification and connections of inspiratory premotor neurons in songbirds and budgerigar. J. Comp. Neurol., 391: 147-163. https://doi.org/10.1002/(SICI)1096-9861(19980209)391:2<147::AID-CNE1>3.0.CO;2-2 Sex: Not Reported Age: Not Reported Method: BDA and CTB
PAm	R	Zebra Finch	**Zebra Finch** *Taeniopygia guttata* Reinke, H. and Wild, J.M. (1998), Identification and connections of inspiratory premotor neurons in songbirds and budgerigar. J. Comp. Neurol., 391: 147-163. https://doi.org/10.1002/(SICI)1096-9861(19980209)391:2<147::AID-CNE1>3.0.CO;2-2 Sex: Male Age: Not Reported Method: BDA (10kDa)
PAm	DM	Zebra Finch	**Zebra Finch** *Taeniopygia guttata* Reinke, H. and Wild, J.M. (1998), Identification and connections of inspiratory premotor neurons in songbirds and budgerigar. J. Comp. Neurol., 391: 147-163. https://doi.org/10.1002/(SICI)1096-9861(19980209)391:2<147::AID-CNE1>3.0.CO;2-2 Sex: Not Reported Age: Not Reported Method: BDA and CTB
PAm	Cu	Zebra Finch	**Zebra Finch** *Taeniopygia guttata* Reinke, H. and Wild, J.M. (1998), Identification and connections of inspiratory premotor neurons in songbirds and budgerigar. J. Comp. Neurol., 391: 147-163. https://doi.org/10.1002/(SICI)1096-9861(19980209)391:2<147::AID-CNE1>3.0.CO;2-2 Sex: Male Age: Not Reported Method: BDA (10kDa)
paraHVC	CMM	Zebra Finch	**Zebra Finch** *Taeniopygia guttata* Foster, E. F., & Bottjer, S. W. (1998). Axonal connections of the high vocal center and surrounding cortical regions in juvenile and adult male zebra finches. The Journal of comparative neurology, 397(1), 118-138. https://doi.org/10.1002/(SICI)1096-9861(19980720)397:1<118::AID-CNE9>3.0.CO;2-3 Sex: Males Age: Adults and Juvenlies (20-30 pdh) Method: rhodamine …
paraHVC	MMAN	Zebra Finch	**Zebra Finch** *Taeniopygia guttata* Foster, E. F., & Bottjer, S. W. (1998). Axonal connections of the high vocal center and surrounding cortical regions in juvenile and adult male zebra finches. The Journal of comparative neurology, 397(1), 118-138. https://doi.org/10.1002/(SICI)1096-9861(19980720)397:1<118::AID-CNE9>3.0.CO;2-3 Sex: Males Age: Adults and Juvenlies (20-30 pdh) Method: rhodamine …
paraHVC	MSt	Zebra Finch	**Zebra Finch** *Taeniopygia guttata* Foster, E. F., & Bottjer, S. W. (1998). Axonal connections of the high vocal center and surrounding cortical regions in juvenile and adult male zebra finches. The Journal of comparative neurology, 397(1), 118-138. https://doi.org/10.1002/(SICI)1096-9861(19980720)397:1<118::AID-CNE9>3.0.CO;2-3 Sex: Males Age: Adults and Juvenlies (20-30 pdh) Method: rhodamine …
paraHVC	RA Cup	Zebra Finch	**Zebra Finch** *Taeniopygia guttata* Yip, Z. C., Miller-Sims, V. C., & Bottjer, S. W. (2012). Morphology of axonal projections from the high vocal center to vocal motor cortex in songbirds. The Journal of comparative neurology, 520(12), 2742-2756. https://doi.org/10.1002/cne.23084 Sex: Males Age: Adult (>P90) Method: BDA; lentivirus (GFP)
paraHVC	AD	Zebra Finch	**Zebra Finch** *Taeniopygia guttata* Foster, E. F., & Bottjer, S. W. (1998). Axonal connections of the high vocal center and surrounding cortical regions in juvenile and adult male zebra finches. The Journal of comparative neurology, 397(1), 118-138. https://doi.org/10.1002/(SICI)1096-9861(19980720)397:1<118::AID-CNE9>3.0.CO;2-3 Sex: Males Age: Adults and Juvenlies (20-30 pdh) Method: rhodamine …
paraHVC	NCL	Zebra Finch	**Zebra Finch** *Taeniopygia guttata* Foster, E. F., & Bottjer, S. W. (1998). Axonal connections of the high vocal center and surrounding cortical regions in juvenile and adult male zebra finches. The Journal of comparative neurology, 397(1), 118-138. https://doi.org/10.1002/(SICI)1096-9861(19980720)397:1<118::AID-CNE9>3.0.CO;2-3 Sex: Males Age: Adults and Juvenlies (20-30 pdh) Method: rhodamine …
paraHVC	RA	Zebra Finch	**Zebra Finch** *Taeniopygia guttata* Yip, Z. C., Miller-Sims, V. C., & Bottjer, S. W. (2012). Morphology of axonal projections from the high vocal center to vocal motor cortex in songbirds. The Journal of comparative neurology, 520(12), 2742-2756. https://doi.org/10.1002/cne.23084 Sex: Males Age: Adult (>P90) Method: BDA; lentivirus (GFP)
paraHVC	AIV	Zebra Finch	**Zebra Finch** *Taeniopygia guttata* Foster, E. F., & Bottjer, S. W. (1998). Axonal connections of the high vocal center and surrounding cortical regions in juvenile and adult male zebra finches. The Journal of comparative neurology, 397(1), 118-138. https://doi.org/10.1002/(SICI)1096-9861(19980720)397:1<118::AID-CNE9>3.0.CO;2-3 Sex: Males Age: Adults and Juvenlies (20-30 pdh) Method: rhodamine …
paraHVC	CSt	Zebra Finch	**Zebra Finch** *Taeniopygia guttata* Foster, E. F., & Bottjer, S. W. (1998). Axonal connections of the high vocal center and surrounding cortical regions in juvenile and adult male zebra finches. The Journal of comparative neurology, 397(1), 118-138. https://doi.org/10.1002/(SICI)1096-9861(19980720)397:1<118::AID-CNE9>3.0.CO;2-3 Sex: Males Age: Adults and Juvenlies (20-30 pdh) Method: rhodamine …
paraHVC	NCM	Zebra Finch	**Zebra Finch** *Taeniopygia guttata* Foster, E. F., & Bottjer, S. W. (1998). Axonal connections of the high vocal center and surrounding cortical regions in juvenile and adult male zebra finches. The Journal of comparative neurology, 397(1), 118-138. https://doi.org/10.1002/(SICI)1096-9861(19980720)397:1<118::AID-CNE9>3.0.CO;2-3 Sex: Males Age: Adults and Juvenlies (20-30 pdh) Method: rhodamine …
paraHVC	Area X	Zebra Finch	**Zebra Finch** *Taeniopygia guttata* Castelino, C. B., Diekamp, B., & Ball, G. F. (2007). Noradrenergic projections to the song control nucleus area X of the medial striatum in male zebra finches (Taeniopygia guttata). The Journal of comparative neurology, 502(4), 544-562. https://doi.org/10.1002/cne.21337 Sex: Males Age: Adult Method: retrograde tracer CTB, anterograde tracer BDA --- **Zebra Fi…
PBvl	PAm	Zebra Finch	**Zebra Finch** *Taeniopygia guttata* Reinke, H. and Wild, J.M. (1998), Identification and connections of inspiratory premotor neurons in songbirds and budgerigar. J. Comp. Neurol., 391: 147-163. https://doi.org/10.1002/(SICI)1096-9861(19980209)391:2<147::AID-CNE1>3.0.CO;2-2 Sex: Not Reported Age: Not Reported Method: BDA and CTB --- **Zebra Finch** *Taeniopygia guttata* Wild, J. M., Kubke, M. F.…
PBvl	RAm	Zebra Finch	**Zebra Finch** *Taeniopygia guttata* Reinke, H. and Wild, J.M. (1998), Identification and connections of inspiratory premotor neurons in songbirds and budgerigar. J. Comp. Neurol., 391: 147-163. https://doi.org/10.1002/(SICI)1096-9861(19980209)391:2<147::AID-CNE1>3.0.CO;2-2 Sex: Not Reported Age: Not Reported Method: BDA and CTB --- **Zebra Finch** *Taeniopygia guttata* Wild, J. M., Kubke, M. F.…
Pineal Gland	PVN	Non-Zebra Finch	**House Sparrow** *Passer domesticus* Korf, H. W., Zimmerman, N. H., & Oksche, A. (1982). Intrinsic neurons and neural connections of the pineal organ of the house sparrow, Passer domesticus, as revealed by anterograde and retrograde transport of horseradish peroxidase. Cell and tissue research, 222(2), 243-260. https://doi.org/10.1007/BF00213210 Sex: Undetermined Age: Not Reported Method: HRP
Pineal Gland	LHb	Non-Zebra Finch	**House Sparrow** *Passer domesticus* Korf, H. W., Zimmerman, N. H., & Oksche, A. (1982). Intrinsic neurons and neural connections of the pineal organ of the house sparrow, Passer domesticus, as revealed by anterograde and retrograde transport of horseradish peroxidase. Cell and tissue research, 222(2), 243-260. https://doi.org/10.1007/BF00213210 Sex: Undetermined Age: Not Reported Method: HRP
Pineal Gland	MHb	Non-Zebra Finch	**House Sparrow** *Passer domesticus* Korf, H. W., Zimmerman, N. H., & Oksche, A. (1982). Intrinsic neurons and neural connections of the pineal organ of the house sparrow, Passer domesticus, as revealed by anterograde and retrograde transport of horseradish peroxidase. Cell and tissue research, 222(2), 243-260. https://doi.org/10.1007/BF00213210 Sex: Undetermined Age: Not Reported Method: HRP
PL	Uva	Zebra Finch	**Zebra Finch** *Taeniopygia guttata* Wild, J. M., & Gaede, A. H. (2016). Second tectofugal pathway in a songbird *Taeniopygia guttata) revisited: Tectal and lateral pontine projections to the posterior thalamus, thence to the intermediate nidopallium. The Journal of comparative neurology, 524(5), 963-985. https://doi.org/10.1002/cne.23886 Sex: Undetermined Age: Adult (>P100) Method: BDA; CTB
PL	DCN	Zebra Finch	**Zebra Finch** *Taeniopygia guttata* Wild, J. M., & Gaede, A. H. (2016). Second tectofugal pathway in a songbird *Taeniopygia guttata) revisited: Tectal and lateral pontine projections to the posterior thalamus, thence to the intermediate nidopallium. The Journal of comparative neurology, 524(5), 963-985. https://doi.org/10.1002/cne.23886 Sex: Undetermined Age: Adult (>P100) Method: BDA
PL	SpA	Zebra Finch	**Zebra Finch** *Taeniopygia guttata* Wild, J. M., & Gaede, A. H. (2016). Second tectofugal pathway in a songbird *Taeniopygia guttata) revisited: Tectal and lateral pontine projections to the posterior thalamus, thence to the intermediate nidopallium. The Journal of comparative neurology, 524(5), 963-985. https://doi.org/10.1002/cne.23886 Sex: Undetermined Age: Adult (>P100) Method: BDA
PL	OCb	Zebra Finch	**Zebra Finch** *Taeniopygia guttata* Wild, J. M., & Gaede, A. H. (2016). Second tectofugal pathway in a songbird *Taeniopygia guttata) revisited: Tectal and lateral pontine projections to the posterior thalamus, thence to the intermediate nidopallium. The Journal of comparative neurology, 524(5), 963-985. https://doi.org/10.1002/cne.23886 Sex: Undetermined Age: Adult (>P100) Method: CTB
PL	nTOv	Zebra Finch	**Zebra Finch** *Taeniopygia guttata* Wild, J. M., & Gaede, A. H. (2016). Second tectofugal pathway in a songbird *Taeniopygia guttata) revisited: Tectal and lateral pontine projections to the posterior thalamus, thence to the intermediate nidopallium. The Journal of comparative neurology, 524(5), 963-985. https://doi.org/10.1002/cne.23886 Sex: Undetermined Age: Adult (>P100) Method: BDA
PLL	Bas	Zebra Finch	**Zebra Finch** *Taeniopygia guttata* Wild, J. M., & Farabaugh, S. M. (1996). Organization of afferent and efferent projections of the nucleus basalis prosencephali in a passerine, Taeniopygia guttata. The Journal of comparative neurology, 365(2), 306-328. https://doi.org/10.1002/(SICI)1096-9861(19960205)365:2<306::AID-CNE8>3.0.CO;2-9 Sex: Males Age: Adult Method: BDA, CTB, evoked potentials
PM	VeS	Zebra Finch	**Zebra Finch** *Taeniopygia guttata* Wylie, D. R., Gaede, A. H., Gutiérrez-Ibáñez, C., Wu, P. H., Pilon, M. C., Azargoon, S., & Altshuler, D. L. (2023). Topography of optic flow processing in olivo-cerebellar pathways in zebra finches (Taeniopygia guttata). The Journal of comparative neurology, 531(6), 640-662. https://doi.org/10.1002/cne.25454 Sex: Males Age: Adult Method: fluorescent dextran
POA	VMH	Zebra Finch	**Zebra Finch** *Taeniopygia guttata* Wild J. M. (2017). The ventromedial hypothalamic nucleus in the zebra finch *Taeniopygia guttata): Afferent and efferent projections in relation to the control of reproductive behavior. The Journal of comparative neurology, 525(12), 2657-2676. https://doi.org/10.1002/cne.24225 Sex: Males and Females Age: Adult Method: CTB Laterality: ipsilateral
PoA	VMH	Zebra Finch	**Zebra Finch** *Taeniopygia guttata* Wild J. M. (2017). The ventromedial hypothalamic nucleus in the zebra finch *Taeniopygia guttata): Afferent and efferent projections in relation to the control of reproductive behavior. The Journal of comparative neurology, 525(12), 2657-2676. https://doi.org/10.1002/cne.24225 Sex: Males and Females Age: Adult Method: CTB
PoA	NFL	Non-Zebra Finch	**Eurasian Blackcap** *Sylvia atricapilla* Kobylkov, D., Schwarze, S., Michalik, B., Winklhofer, M., Mouritsen, H., & Heyers, D. (2020). A newly identified trigeminal brain pathway in a night-migratory bird could be dedicated to transmitting magnetic map information. Proceedings. Biological sciences, 287(1919), 20192788. https://doi.org/10.1098/rspb.2019.2788 Sex: Undetermined Age: Adult Method: …
PoA	Ov (Core)	Zebra Finch	**Zebra Finch** *Taeniopygia guttata* Vates, G. E., Broome, B. M., Mello, C. V., & Nottebohm, F. (1996). Auditory pathways of caudal telencephalon and their relation to the song system of adult male zebra finches. The Journal of comparative neurology, 366(4), 613-642. https://doi.org/10.1002/(SICI)1096-9861(19960318)366:4<613::AID-CNE5>3.0.CO;2-7 Sex: Males Age: Adult (>P120) Method: BDA (3kDa) o…
POA	POM	Non-Zebra Finch	**European Starling** *Sturnus vulgaris* Riters, L. V., & Alger, S. J. (2004). Neuroanatomical evidence for indirect connections between the medial preoptic nucleus and the song control system: possible neural substrates for sexually motivated song. Cell and tissue research, 316(1), 35-44. https://doi.org/10.1007/s00441-003-0838-6 Sex: Males Age: Adult Method: BDA
POM	DMHp	Non-Zebra Finch	**European Starling** *Sturnus vulgaris* Riters, L. V., & Alger, S. J. (2004). Neuroanatomical evidence for indirect connections between the medial preoptic nucleus and the song control system: possible neural substrates for sexually motivated song. Cell and tissue research, 316(1), 35-44. https://doi.org/10.1007/s00441-003-0838-6 Sex: Males Age: Adult Method: BDA
POM	nHpC	Non-Zebra Finch	**European Starling** *Sturnus vulgaris* Riters, L. V., & Alger, S. J. (2004). Neuroanatomical evidence for indirect connections between the medial preoptic nucleus and the song control system: possible neural substrates for sexually motivated song. Cell and tissue research, 316(1), 35-44. https://doi.org/10.1007/s00441-003-0838-6 Sex: Males Age: Adult Method: BDA
POM	VMH	Non-Zebra Finch	**European Starling** *Sturnus vulgaris* Riters, L. V., & Alger, S. J. (2004). Neuroanatomical evidence for indirect connections between the medial preoptic nucleus and the song control system: possible neural substrates for sexually motivated song. Cell and tissue research, 316(1), 35-44. https://doi.org/10.1007/s00441-003-0838-6 Sex: Males Age: Adult Method: BDA
POM	SHb	Non-Zebra Finch	**European Starling** Riters, L. V., & Alger, S. J. (2004). Neuroanatomical evidence for indirect connections between the medial preoptic nucleus and the song control system: possible neural substrates for sexually motivated song. Cell and tissue research, 316(1), 35–44. https://doi.org/10.1007/s00441-003-0838-6
POM	AD	Non-Zebra Finch	**European Starling** *Sturnus vulgaris* Riters, L. V., & Alger, S. J. (2004). Neuroanatomical evidence for indirect connections between the medial preoptic nucleus and the song control system: possible neural substrates for sexually motivated song. Cell and tissue research, 316(1), 35-44. https://doi.org/10.1007/s00441-003-0838-6 Sex: Males Age: Adult Method: BDA
POM	PVN	Non-Zebra Finch	**European Starling** *Sturnus vulgaris* Riters, L. V., & Alger, S. J. (2004). Neuroanatomical evidence for indirect connections between the medial preoptic nucleus and the song control system: possible neural substrates for sexually motivated song. Cell and tissue research, 316(1), 35-44. https://doi.org/10.1007/s00441-003-0838-6 Sex: Males Age: Adult Method: BDA
POM	BSTM	Non-Zebra Finch	**European Starling** *Sturnus vulgaris* Riters, L. V., & Alger, S. J. (2004). Neuroanatomical evidence for indirect connections between the medial preoptic nucleus and the song control system: possible neural substrates for sexually motivated song. Cell and tissue research, 316(1), 35-44. https://doi.org/10.1007/s00441-003-0838-6 Sex: Males Age: Adult Method: BDA
POM	LHy	Non-Zebra Finch	**European Starling** *Sturnus vulgaris* Riters, L. V., & Alger, S. J. (2004). Neuroanatomical evidence for indirect connections between the medial preoptic nucleus and the song control system: possible neural substrates for sexually motivated song. Cell and tissue research, 316(1), 35-44. https://doi.org/10.1007/s00441-003-0838-6 Sex: Males Age: Adult Method: BDA
POM	DM	Non-Zebra Finch	**European Starling** *Sturnus vulgaris* Riters, L. V., & Alger, S. J. (2004). Neuroanatomical evidence for indirect connections between the medial preoptic nucleus and the song control system: possible neural substrates for sexually motivated song. Cell and tissue research, 316(1), 35-44. https://doi.org/10.1007/s00441-003-0838-6 Sex: Males Age: Adult Method: BDA
POM	DMP	Non-Zebra Finch	**European Starling** *Sturnus vulgaris* Riters, L. V., & Alger, S. J. (2004). Neuroanatomical evidence for indirect connections between the medial preoptic nucleus and the song control system: possible neural substrates for sexually motivated song. Cell and tissue research, 316(1), 35-44. https://doi.org/10.1007/s00441-003-0838-6 Sex: Males Age: Adult Method: BDA
POM	POA	Non-Zebra Finch	**European Starling** *Sturnus vulgaris* Riters, L. V., & Alger, S. J. (2004). Neuroanatomical evidence for indirect connections between the medial preoptic nucleus and the song control system: possible neural substrates for sexually motivated song. Cell and tissue research, 316(1), 35-44. https://doi.org/10.1007/s00441-003-0838-6 Sex: Males Age: Adult Method: BDA
POM	CG	Zebra Finch|Non-Zebra Finch	**Zebra Finch** *Taeniopygia guttata* Ben-Tov, M., Duarte, F., & Mooney, R. (2023). A neural hub for holistic courtship displays. Current biology : CB, 33(9), 1640-1653.e5. https://doi.org/10.1016/j.cub.2023.02.072 Sex: Males Age: Adult Method: Retrobeads --- **European Starling** *Sturnus vulgaris* Riters, L. V., & Alger, S. J. (2004). Neuroanatomical evidence for indirect connections between th…
POM	AH	Non-Zebra Finch	**European Starling** *Sturnus vulgaris* Riters, L. V., & Alger, S. J. (2004). Neuroanatomical evidence for indirect connections between the medial preoptic nucleus and the song control system: possible neural substrates for sexually motivated song. Cell and tissue research, 316(1), 35-44. https://doi.org/10.1007/s00441-003-0838-6 Sex: Males Age: Adult Method: BDA
POM	LS	Non-Zebra Finch	**European Starling** *Sturnus vulgaris* Riters, L. V., & Alger, S. J. (2004). Neuroanatomical evidence for indirect connections between the medial preoptic nucleus and the song control system: possible neural substrates for sexually motivated song. Cell and tissue research, 316(1), 35-44. https://doi.org/10.1007/s00441-003-0838-6 Sex: Males Age: Adult Method: BDA
POM	MS	Non-Zebra Finch	**European Starling** *Sturnus vulgaris* Riters, L. V., & Alger, S. J. (2004). Neuroanatomical evidence for indirect connections between the medial preoptic nucleus and the song control system: possible neural substrates for sexually motivated song. Cell and tissue research, 316(1), 35-44. https://doi.org/10.1007/s00441-003-0838-6 Sex: Males Age: Adult Method: BDA
POM	Tu	Non-Zebra Finch	**European Starling** *Sturnus vulgaris* Riters, L. V., & Alger, S. J. (2004). Neuroanatomical evidence for indirect connections between the medial preoptic nucleus and the song control system: possible neural substrates for sexually motivated song. Cell and tissue research, 316(1), 35-44. https://doi.org/10.1007/s00441-003-0838-6 Sex: Male Age: Adult Method: BDA
POM	TnA	Non-Zebra Finch	**European Starling** *Sturnus vulgaris* Riters, L. V., & Alger, S. J. (2004). Neuroanatomical evidence for indirect connections between the medial preoptic nucleus and the song control system: possible neural substrates for sexually motivated song. Cell and tissue research, 316(1), 35-44. https://doi.org/10.1007/s00441-003-0838-6 Sex: Males Age: Adult Method: BDA
POM	BSTL	Non-Zebra Finch	**European Starling** *Sturnus vulgaris* Riters, L. V., & Alger, S. J. (2004). Neuroanatomical evidence for indirect connections between the medial preoptic nucleus and the song control system: possible neural substrates for sexually motivated song. Cell and tissue research, 316(1), 35-44. https://doi.org/10.1007/s00441-003-0838-6 Sex: Males Age: Adult Method: BDA
POM	LoC	Non-Zebra Finch	**European Starling** *Sturnus vulgaris* Riters, L. V., & Alger, S. J. (2004). Neuroanatomical evidence for indirect connections between the medial preoptic nucleus and the song control system: possible neural substrates for sexually motivated song. Cell and tissue research, 316(1), 35-44. https://doi.org/10.1007/s00441-003-0838-6 Sex: Males Age: Adult Method: BDA
POM	MHb	Non-Zebra Finch	**European Starling** *Sturnus vulgaris* Riters, L. V., & Alger, S. J. (2004). Neuroanatomical evidence for indirect connections between the medial preoptic nucleus and the song control system: possible neural substrates for sexually motivated song. Cell and tissue research, 316(1), 35-44. https://doi.org/10.1007/s00441-003-0838-6 Sex: Males Age: Adult Method: BDA
POM	DLHp	Non-Zebra Finch	**European Starling** *Sturnus vulgaris* Riters, L. V., & Alger, S. J. (2004). Neuroanatomical evidence for indirect connections between the medial preoptic nucleus and the song control system: possible neural substrates for sexually motivated song. Cell and tissue research, 316(1), 35-44. https://doi.org/10.1007/s00441-003-0838-6 Sex: Males Age: Adult Method: BDA
POM	R	Non-Zebra Finch	**European Starling** *Sturnus vulgaris* Riters, L. V., & Alger, S. J. (2004). Neuroanatomical evidence for indirect connections between the medial preoptic nucleus and the song control system: possible neural substrates for sexually motivated song. Cell and tissue research, 316(1), 35-44. https://doi.org/10.1007/s00441-003-0838-6 Sex: Males Age: Adult Method: BDA
POM	ICo	Non-Zebra Finch	**European Starling** *Sturnus vulgaris* Riters, L. V., & Alger, S. J. (2004). Neuroanatomical evidence for indirect connections between the medial preoptic nucleus and the song control system: possible neural substrates for sexually motivated song. Cell and tissue research, 316(1), 35-44. https://doi.org/10.1007/s00441-003-0838-6 Sex: Males Age: Adult Method: BDA
POM	AM	Non-Zebra Finch	**European Starling** *Sturnus vulgaris* Riters, L. V., & Alger, S. J. (2004). Neuroanatomical evidence for indirect connections between the medial preoptic nucleus and the song control system: possible neural substrates for sexually motivated song. Cell and tissue research, 316(1), 35-44. https://doi.org/10.1007/s00441-003-0838-6 Sex: Males Age: Adult Method: BDA
POM	VTA	Non-Zebra Finch	**European Starling** *Sturnus vulgaris* Riters, L. V., & Alger, S. J. (2004). Neuroanatomical evidence for indirect connections between the medial preoptic nucleus and the song control system: possible neural substrates for sexually motivated song. Cell and tissue research, 316(1), 35-44. https://doi.org/10.1007/s00441-003-0838-6 Sex: Males Age: Adult Method: BDA
PPC	VbC	Zebra Finch	**Zebra Finch** *Taeniopygia guttata* Gaede, A. H., Gutierrez-Ibanez, C., Armstrong, M. S., Altshuler, D. L., & Wylie, D. R. (2019). Pretectal projections to the oculomotor cerebellum in hummingbirds (Calypte anna), zebra finches *Taeniopygia guttata), and pigeons (Columba livia). The Journal of comparative neurology, 527(16), 2644-2658. https://doi.org/10.1002/cne.24697 Sex: Males Age: Adult Met…
PPC	OCb	Zebra Finch	**Zebra Finch** *Taeniopygia guttata* Gaede, A. H., Gutierrez-Ibanez, C., Armstrong, M. S., Altshuler, D. L., & Wylie, D. R. (2019). Pretectal projections to the oculomotor cerebellum in hummingbirds (Calypte anna), zebra finches *Taeniopygia guttata), and pigeons (Columba livia). The Journal of comparative neurology, 527(16), 2644-2658. https://doi.org/10.1002/cne.24697 Sex: Males Age: Adult Met…
PPT	VP	Zebra Finch	**Zebra Finch** *Taeniopygia guttata* Li, R., Zuo, M. X., & Sakaguchi, H. (1999). Auditory-vocal cholinergic pathway in zebra finch brain. Neuroreport, 10(1), 165-169. https://doi.org/10.1097/00001756-199901180-00032 Sex: Males Age: Adult Method: anterograde and retrograde tracer BDA; retrograde tracer fluoro-red
PPT	Uva	Zebra Finch	**Zebra Finch** *Taeniopygia guttata* Striedter, G. F., & Vu, E. T. (1998). Bilateral feedback projections to the forebrain in the premotor network for singing in zebra finches. Journal of neurobiology, 34(1), 27-40. https://doi.org/10.1002/(SICI)1097-4695(199801)34:1%3C27::AID-NEU3%3E3.0.CO;2-E Sex: Males Age: Adult Method: BDA
PrV	E	Zebra Finch	**Zebra Finch** *Taeniopygia guttata* Nixdorf, B. E., & Bischof, H. J. (1982). Afferent connections of the ectostriatum and visual wulst in the zebra finch (Taeniopygia guttata castanotis Gould)--an HRP study. Brain research, 248(1), 9-17. https://doi.org/10.1016/0006-8993(82)91142-8 Sex: Males Age: Adult Method: HRP
PrV	Uva	Zebra Finch	**Zebra Finch** *Taeniopygia guttata* Faunes, M., & Wild, J. M. (2017). The ascending projections of the nuclei of the descending trigeminal tract (nTTD) in the zebra finch *Taeniopygia guttata). The Journal of comparative neurology, 525(13), 2832-2846. https://doi.org/10.1002/cne.24247 Sex: Undetermined Age: Adult Method: retrograde tracer BDA or CTB
PrV	Bas	Zebra Finch|Non-Zebra Finch	**Zebra Finch** *Taeniopygia guttata* Faunes, M., & Wild, J. M. (2017). The ascending projections of the nuclei of the descending trigeminal tract (nTTD) in the zebra finch *Taeniopygia guttata). The Journal of comparative neurology, 525(13), 2832-2846. https://doi.org/10.1002/cne.24247 Sex: Undetermined Age: Adult Method: retrograde tracer BDA or CTB --- **Eurasian Blackcap** *Sylvia atricapilla…
PrV	NFL	Non-Zebra Finch	**Eurasian Blackcap** *Sylvia atricapilla* Kobylkov, D., Schwarze, S., Michalik, B., Winklhofer, M., Mouritsen, H., & Heyers, D. (2020). A newly identified trigeminal brain pathway in a night-migratory bird could be dedicated to transmitting magnetic map information. Proceedings. Biological sciences, 287(1919), 20192788. https://doi.org/10.1098/rspb.2019.2788 Sex: Undetermined Age: Adult Method: …
PrV	DIVA	Zebra Finch	**Zebra Finch** *Taeniopygia guttata* Faunes, M., & Wild, J. M. (2017). The ascending projections of the nuclei of the descending trigeminal tract (nTTD) in the zebra finch *Taeniopygia guttata). The Journal of comparative neurology, 525(13), 2832-2846. https://doi.org/10.1002/cne.24247 Sex: Undetermined Age: Adult Method: retrograde tracer BDA or CTB
PT	NCL	Zebra Finch	**Zebra Finch** *Taeniopygia guttata* Sadananda, M., Korte, S., & Bischof, H. J. (2007). Afferentation of a caudal forebrain area activated during courtship behavior: a tracing study in the zebra finch *Taeniopygia guttata). Brain research, 1184, 108-120. https://doi.org/10.1016/j.brainres.2007.09.040 Sex: Males Age: Adult Method: Rhodamine B-Isothiocyanate and Diamidino Yellow (Dihydrochloride);…
PT	AI	Zebra Finch	**Zebra Finch** *Taeniopygia guttata* Sadananda, M., Korte, S., & Bischof, H. J. (2007). Afferentation of a caudal forebrain area activated during courtship behavior: a tracing study in the zebra finch *Taeniopygia guttata). Brain research, 1184, 108-120. https://doi.org/10.1016/j.brainres.2007.09.040 Sex: Males Age: Adult Method: Rhodamine B-Isothiocyanate and Diamidino Yellow (Dihydrochloride);…
PT	E	Zebra Finch	**Zebra Finch** *Taeniopygia guttata* Nixdorf, B. E., & Bischof, H. J. (1982). Afferent connections of the ectostriatum and visual wulst in the zebra finch *Taeniopygia guttata castanotis Gould)--an HRP study. Brain research, 248(1), 9-17. https://doi.org/10.1016/0006-8993(82)91142-8 Sex: Males Age: Adult Method: HRP
PT	NIL	Zebra Finch	**Zebra Finch** *Taeniopygia guttata* Sadananda, M., & Bischof, H. J. (2006). Afferentation of the lateral nidopallium: A tracing study of a brain area involved in sexual imprinting in the zebra finch *Taeniopygia guttata). Brain research, 1106(1), 111-122. https://doi.org/10.1016/j.brainres.2006.04.009 Sex: Undetermined Age: Adult Method: BDA; RITC
PT	HA (Caudal)	Zebra Finch	**Zebra Finch** *Taeniopygia guttata* Nixdorf, B. E., & Bischof, H. J. (1982). Afferent connections of the ectostriatum and visual wulst in the zebra finch *Taeniopygia guttata castanotis Gould)--an HRP study. Brain research, 248(1), 9-17. https://doi.org/10.1016/0006-8993(82)91142-8 Sex: Males Age: Adult Method: HRP
PVN	VbC	Non-Zebra Finch	**House Finch** *Haemorhous mexicanus* Singletary, K. G., Deviche, P., Strand, C., & Delville, Y. (2006). Distribution of orexin/hypocretin immunoreactivity in the brain of a male songbird, the house finch, Carpodacus mexicanus. Journal of chemical neuroanatomy, 32(2-4), 81-89. https://doi.org/10.1016/j.jchemneu.2006.05.003 Sex: Males Age: Adult (>P180) Method: IHC for orexin A and B
PVN	MSt	Non-Zebra Finch	**House Finch** *Haemorhous mexicanus* Singletary, K. G., Deviche, P., Strand, C., & Delville, Y. (2006). Distribution of orexin/hypocretin immunoreactivity in the brain of a male songbird, the house finch, Carpodacus mexicanus. Journal of chemical neuroanatomy, 32(2-4), 81-89. https://doi.org/10.1016/j.jchemneu.2006.05.003 Sex: Males Age: Adult (>P180) Method: IHC for orexin A and B
PVN	E	Non-Zebra Finch	**House Finch** *Haemorhous mexicanus* Singletary, K. G., Deviche, P., Strand, C., & Delville, Y. (2006). Distribution of orexin/hypocretin immunoreactivity in the brain of a male songbird, the house finch, Carpodacus mexicanus. Journal of chemical neuroanatomy, 32(2-4), 81-89. https://doi.org/10.1016/j.jchemneu.2006.05.003 Sex: Males Age: Adult (>P180) Method: IHC for orexin A and B
PVN	EM	Non-Zebra Finch	**House Finch** *Haemorhous mexicanus* Singletary, K. G., Deviche, P., Strand, C., & Delville, Y. (2006). Distribution of orexin/hypocretin immunoreactivity in the brain of a male songbird, the house finch, Carpodacus mexicanus. Journal of chemical neuroanatomy, 32(2-4), 81-89. https://doi.org/10.1016/j.jchemneu.2006.05.003 Sex: Males Age: Adult (>P180) Method: IHC for orexin A and B --- **White …
PVN	DMP	Non-Zebra Finch	**House Finch** *Haemorhous mexicanus* Singletary, K. G., Deviche, P., Strand, C., & Delville, Y. (2006). Distribution of orexin/hypocretin immunoreactivity in the brain of a male songbird, the house finch, Carpodacus mexicanus. Journal of chemical neuroanatomy, 32(2-4), 81-89. https://doi.org/10.1016/j.jchemneu.2006.05.003 Sex: Males Age: Adult (>P180) Method: IHC for orexin A and B --- **White …
PVN	LHb	Non-Zebra Finch	**House Finch** *Haemorhous mexicanus* Singletary, K. G., Deviche, P., Strand, C., & Delville, Y. (2006). Distribution of orexin/hypocretin immunoreactivity in the brain of a male songbird, the house finch, Carpodacus mexicanus. Journal of chemical neuroanatomy, 32(2-4), 81-89. https://doi.org/10.1016/j.jchemneu.2006.05.003 Sex: Males Age: Adult (>P180) Method: IHC for orexin A and B
PVN	CSt	Non-Zebra Finch	**House Finch** *Haemorhous mexicanus* Singletary, K. G., Deviche, P., Strand, C., & Delville, Y. (2006). Distribution of orexin/hypocretin immunoreactivity in the brain of a male songbird, the house finch, Carpodacus mexicanus. Journal of chemical neuroanatomy, 32(2-4), 81-89. https://doi.org/10.1016/j.jchemneu.2006.05.003 Sex: Males Age: Adult (>P180) Method: IHC for orexin A and B
PVN	SpM	Non-Zebra Finch	**House Finch** *Haemorhous mexicanus* Singletary, K. G., Deviche, P., Strand, C., & Delville, Y. (2006). Distribution of orexin/hypocretin immunoreactivity in the brain of a male songbird, the house finch, Carpodacus mexicanus. Journal of chemical neuroanatomy, 32(2-4), 81-89. https://doi.org/10.1016/j.jchemneu.2006.05.003 Sex: Males Age: Adult (>P180) Method: IHC for orexin A and B
PVN	DLA	Non-Zebra Finch	**House Finch** *Haemorhous mexicanus* Singletary, K. G., Deviche, P., Strand, C., & Delville, Y. (2006). Distribution of orexin/hypocretin immunoreactivity in the brain of a male songbird, the house finch, Carpodacus mexicanus. Journal of chemical neuroanatomy, 32(2-4), 81-89. https://doi.org/10.1016/j.jchemneu.2006.05.003 Sex: Males Age: Adult (>P180) Method: IHC for orexin A and B
PVN	FRM	Non-Zebra Finch	**House Finch** *Haemorhous mexicanus* Singletary, K. G., Deviche, P., Strand, C., & Delville, Y. (2006). Distribution of orexin/hypocretin immunoreactivity in the brain of a male songbird, the house finch, Carpodacus mexicanus. Journal of chemical neuroanatomy, 32(2-4), 81-89. https://doi.org/10.1016/j.jchemneu.2006.05.003 Sex: Males Age: Adult (>P180) Method: IHC for orexin A and B
PVN	POA	Non-Zebra Finch	**House Finch** *Haemorhous mexicanus* Singletary, K. G., Deviche, P., Strand, C., & Delville, Y. (2006). Distribution of orexin/hypocretin immunoreactivity in the brain of a male songbird, the house finch, Carpodacus mexicanus. Journal of chemical neuroanatomy, 32(2-4), 81-89. https://doi.org/10.1016/j.jchemneu.2006.05.003 Sex: Males Age: Adult (>P180) Method: IHC for orexin A and B --- **White …
PVN	POM	Non-Zebra Finch	**European Starling** *Sturnus vulgaris* Riters, L. V., & Alger, S. J. (2004). Neuroanatomical evidence for indirect connections between the medial preoptic nucleus and the song control system: possible neural substrates for sexually motivated song. Cell and tissue research, 316(1), 35-44. https://doi.org/10.1007/s00441-003-0838-6 Sex: Males Age: Adult Method: BDA
PVN	CG	Non-Zebra Finch	**House Finch** *Haemorhous mexicanus* Singletary, K. G., Deviche, P., Strand, C., & Delville, Y. (2006). Distribution of orexin/hypocretin immunoreactivity in the brain of a male songbird, the house finch, Carpodacus mexicanus. Journal of chemical neuroanatomy, 32(2-4), 81-89. https://doi.org/10.1016/j.jchemneu.2006.05.003 Sex: Males Age: Adult (>P180) Method: IHC for orexin A and B --- **White …
PVN	HD	Non-Zebra Finch	**House Finch** *Haemorhous mexicanus* Singletary, K. G., Deviche, P., Strand, C., & Delville, Y. (2006). Distribution of orexin/hypocretin immunoreactivity in the brain of a male songbird, the house finch, Carpodacus mexicanus. Journal of chemical neuroanatomy, 32(2-4), 81-89. https://doi.org/10.1016/j.jchemneu.2006.05.003 Sex: Males Age: Adult (>P180) Method: IHC for orexin A and B
PVN	NFM	Non-Zebra Finch	**House Finch** *Haemorhous mexicanus* Singletary, K. G., Deviche, P., Strand, C., & Delville, Y. (2006). Distribution of orexin/hypocretin immunoreactivity in the brain of a male songbird, the house finch, Carpodacus mexicanus. Journal of chemical neuroanatomy, 32(2-4), 81-89. https://doi.org/10.1016/j.jchemneu.2006.05.003 Sex: Males Age: Adult (>P180) Method: IHC for orexin A and B
PVN	nIV	Non-Zebra Finch	**House Finch** *Haemorhous mexicanus* Singletary, K. G., Deviche, P., Strand, C., & Delville, Y. (2006). Distribution of orexin/hypocretin immunoreactivity in the brain of a male songbird, the house finch, Carpodacus mexicanus. Journal of chemical neuroanatomy, 32(2-4), 81-89. https://doi.org/10.1016/j.jchemneu.2006.05.003 Sex: Males Age: Adult (>P180) Method: IHC for orexin A and B
PVN	NIM	Non-Zebra Finch	**House Finch** *Haemorhous mexicanus* Singletary, K. G., Deviche, P., Strand, C., & Delville, Y. (2006). Distribution of orexin/hypocretin immunoreactivity in the brain of a male songbird, the house finch, Carpodacus mexicanus. Journal of chemical neuroanatomy, 32(2-4), 81-89. https://doi.org/10.1016/j.jchemneu.2006.05.003 Sex: Males Age: Adult (>P180) Method: IHC for orexin A and B
PVN	NIL	Non-Zebra Finch	**House Finch** *Haemorhous mexicanus* Singletary, K. G., Deviche, P., Strand, C., & Delville, Y. (2006). Distribution of orexin/hypocretin immunoreactivity in the brain of a male songbird, the house finch, Carpodacus mexicanus. Journal of chemical neuroanatomy, 32(2-4), 81-89. https://doi.org/10.1016/j.jchemneu.2006.05.003 Sex: Males Age: Adult (>P180) Method: IHC for orexin A and B
PVN	NDB	Non-Zebra Finch	**White Crowned Sparrow** *Zonotrichia leucophrys gambelii* Ubuka, T., Mukai, M., Wolfe, J., Beverly, R., Clegg, S., Wang, A., Hsia, S., Li, M., Krause, J. S., Mizuno, T., Fukuda, Y., Tsutsui, K., Bentley, G. E., & Wingfield, J. C. (2012). RNA interference of gonadotropin-inhibitory hormone gene induces arousal in songbirds. PloS one, 7(1), e30202. https://doi.org/10.1371/journal.pone.0030202 Sex…
PVN	MS	Non-Zebra Finch	**House Finch** *Haemorhous mexicanus* Singletary, K. G., Deviche, P., Strand, C., & Delville, Y. (2006). Distribution of orexin/hypocretin immunoreactivity in the brain of a male songbird, the house finch, Carpodacus mexicanus. Journal of chemical neuroanatomy, 32(2-4), 81-89. https://doi.org/10.1016/j.jchemneu.2006.05.003 Sex: Males Age: Adult (>P180) Method: IHC for orexin A and B
PVN	SN	Non-Zebra Finch	**House Finch** *Haemorhous mexicanus* Singletary, K. G., Deviche, P., Strand, C., & Delville, Y. (2006). Distribution of orexin/hypocretin immunoreactivity in the brain of a male songbird, the house finch, Carpodacus mexicanus. Journal of chemical neuroanatomy, 32(2-4), 81-89. https://doi.org/10.1016/j.jchemneu.2006.05.003 Sex: Males Age: Adult (>P180) Method: IHC for orexin A and B
PVN	LS	Non-Zebra Finch	**House Finch** *Haemorhous mexicanus* Singletary, K. G., Deviche, P., Strand, C., & Delville, Y. (2006). Distribution of orexin/hypocretin immunoreactivity in the brain of a male songbird, the house finch, Carpodacus mexicanus. Journal of chemical neuroanatomy, 32(2-4), 81-89. https://doi.org/10.1016/j.jchemneu.2006.05.003 Sex: Males Age: Adult (>P180) Method: IHC for orexin A and B
PVN	NR	Non-Zebra Finch	**House Finch** *Haemorhous mexicanus* Singletary, K. G., Deviche, P., Strand, C., & Delville, Y. (2006). Distribution of orexin/hypocretin immunoreactivity in the brain of a male songbird, the house finch, Carpodacus mexicanus. Journal of chemical neuroanatomy, 32(2-4), 81-89. https://doi.org/10.1016/j.jchemneu.2006.05.003 Sex: Males Age: Adult (>P180) Method: IHC for orexin A and B
PVN	NCL	Non-Zebra Finch	**House Finch** *Haemorhous mexicanus* Singletary, K. G., Deviche, P., Strand, C., & Delville, Y. (2006). Distribution of orexin/hypocretin immunoreactivity in the brain of a male songbird, the house finch, Carpodacus mexicanus. Journal of chemical neuroanatomy, 32(2-4), 81-89. https://doi.org/10.1016/j.jchemneu.2006.05.003 Sex: Males Age: Adult (>P180) Method: IHC for orexin A and B
PVN	VTA	Non-Zebra Finch	**House Finch** *Haemorhous mexicanus* Singletary, K. G., Deviche, P., Strand, C., & Delville, Y. (2006). Distribution of orexin/hypocretin immunoreactivity in the brain of a male songbird, the house finch, Carpodacus mexicanus. Journal of chemical neuroanatomy, 32(2-4), 81-89. https://doi.org/10.1016/j.jchemneu.2006.05.003 Sex: Males Age: Adult (>P180) Method: IHC for orexin A and B --- **White …
PVN	MHb	Non-Zebra Finch	**House Finch** *Haemorhous mexicanus* Singletary, K. G., Deviche, P., Strand, C., & Delville, Y. (2006). Distribution of orexin/hypocretin immunoreactivity in the brain of a male songbird, the house finch, Carpodacus mexicanus. Journal of chemical neuroanatomy, 32(2-4), 81-89. https://doi.org/10.1016/j.jchemneu.2006.05.003 Sex: Males Age: Adult (>P180) Method: IHC for orexin A and B
PVN	IC	Non-Zebra Finch	**House Finch** *Haemorhous mexicanus* Singletary, K. G., Deviche, P., Strand, C., & Delville, Y. (2006). Distribution of orexin/hypocretin immunoreactivity in the brain of a male songbird, the house finch, Carpodacus mexicanus. Journal of chemical neuroanatomy, 32(2-4), 81-89. https://doi.org/10.1016/j.jchemneu.2006.05.003 Sex: Males Age: Adult (>P180) Method: IHC for orexin A and B
PVN	PoA	Non-Zebra Finch	**House Finch** *Haemorhous mexicanus* Singletary, K. G., Deviche, P., Strand, C., & Delville, Y. (2006). Distribution of orexin/hypocretin immunoreactivity in the brain of a male songbird, the house finch, Carpodacus mexicanus. Journal of chemical neuroanatomy, 32(2-4), 81-89. https://doi.org/10.1016/j.jchemneu.2006.05.003 Sex: Males Age: Adult (>P180) Method: IHC for orexin A and B
PVN	VMH	Non-Zebra Finch	**House Finch** *Haemorhous mexicanus* Singletary, K. G., Deviche, P., Strand, C., & Delville, Y. (2006). Distribution of orexin/hypocretin immunoreactivity in the brain of a male songbird, the house finch, Carpodacus mexicanus. Journal of chemical neuroanatomy, 32(2-4), 81-89. https://doi.org/10.1016/j.jchemneu.2006.05.003 Sex: Males Age: Adult (>P180) Method: IHC for orexin A and B
PVN	OT	Non-Zebra Finch	**House Finch** *Haemorhous mexicanus* Singletary, K. G., Deviche, P., Strand, C., & Delville, Y. (2006). Distribution of orexin/hypocretin immunoreactivity in the brain of a male songbird, the house finch, Carpodacus mexicanus. Journal of chemical neuroanatomy, 32(2-4), 81-89. https://doi.org/10.1016/j.jchemneu.2006.05.003 Sex: Males Age: Adult (>P180) Method: IHC for orexin A and B --- **White …
PVN	MLd	Non-Zebra Finch	**White Crowned Sparrow** *Zonotrichia leucophrys gambelii* Ubuka, T., Mukai, M., Wolfe, J., Beverly, R., Clegg, S., Wang, A., Hsia, S., Li, M., Krause, J. S., Mizuno, T., Fukuda, Y., Tsutsui, K., Bentley, G. E., & Wingfield, J. C. (2012). RNA interference of gonadotropin-inhibitory hormone gene induces arousal in songbirds. PloS one, 7(1), e30202. https://doi.org/10.1371/journal.pone.0030202 Sex…
PVN	PPT	Non-Zebra Finch	**House Finch** *Haemorhous mexicanus* Singletary, K. G., Deviche, P., Strand, C., & Delville, Y. (2006). Distribution of orexin/hypocretin immunoreactivity in the brain of a male songbird, the house finch, Carpodacus mexicanus. Journal of chemical neuroanatomy, 32(2-4), 81-89. https://doi.org/10.1016/j.jchemneu.2006.05.003 Sex: Males Age: Adult (>P180) Method: IHC for orexin A and B
PVN	FRL	Non-Zebra Finch	**House Finch** *Haemorhous mexicanus* Singletary, K. G., Deviche, P., Strand, C., & Delville, Y. (2006). Distribution of orexin/hypocretin immunoreactivity in the brain of a male songbird, the house finch, Carpodacus mexicanus. Journal of chemical neuroanatomy, 32(2-4), 81-89. https://doi.org/10.1016/j.jchemneu.2006.05.003 Sex: Males Age: Adult (>P180) Method: IHC for orexin A and B
PVN	GLv	Non-Zebra Finch	**White Crowned Sparrow** *Zonotrichia leucophrys gambelii* Ubuka, T., Mukai, M., Wolfe, J., Beverly, R., Clegg, S., Wang, A., Hsia, S., Li, M., Krause, J. S., Mizuno, T., Fukuda, Y., Tsutsui, K., Bentley, G. E., & Wingfield, J. C. (2012). RNA interference of gonadotropin-inhibitory hormone gene induces arousal in songbirds. PloS one, 7(1), e30202. https://doi.org/10.1371/journal.pone.0030202 Sex…
PVN	LSt	Non-Zebra Finch	**House Finch** *Haemorhous mexicanus* Singletary, K. G., Deviche, P., Strand, C., & Delville, Y. (2006). Distribution of orexin/hypocretin immunoreactivity in the brain of a male songbird, the house finch, Carpodacus mexicanus. Journal of chemical neuroanatomy, 32(2-4), 81-89. https://doi.org/10.1016/j.jchemneu.2006.05.003 Sex: Males Age: Adult (>P180) Method: IHC for orexin A and B
PVN	DM	Non-Zebra Finch	**White Crowned Sparrow** *Zonotrichia leucophrys gambelii* Ubuka, T., Mukai, M., Wolfe, J., Beverly, R., Clegg, S., Wang, A., Hsia, S., Li, M., Krause, J. S., Mizuno, T., Fukuda, Y., Tsutsui, K., Bentley, G. E., & Wingfield, J. C. (2012). RNA interference of gonadotropin-inhibitory hormone gene induces arousal in songbirds. PloS one, 7(1), e30202. https://doi.org/10.1371/journal.pone.0030202 Sex…
PVN	PM	Non-Zebra Finch	**House Finch** *Haemorhous mexicanus* Singletary, K. G., Deviche, P., Strand, C., & Delville, Y. (2006). Distribution of orexin/hypocretin immunoreactivity in the brain of a male songbird, the house finch, Carpodacus mexicanus. Journal of chemical neuroanatomy, 32(2-4), 81-89. https://doi.org/10.1016/j.jchemneu.2006.05.003 Sex: Males Age: Adult (>P180) Method: IHC for orexin A and B
PVN	HA (Rostral)	Non-Zebra Finch	**House Finch** *Haemorhous mexicanus* Singletary, K. G., Deviche, P., Strand, C., & Delville, Y. (2006). Distribution of orexin/hypocretin immunoreactivity in the brain of a male songbird, the house finch, Carpodacus mexicanus. Journal of chemical neuroanatomy, 32(2-4), 81-89. https://doi.org/10.1016/j.jchemneu.2006.05.003 Sex: Males Age: Adult (>P180) Method: IHC for orexin A and B
PVN	SC	Non-Zebra Finch	**House Finch** *Haemorhous mexicanus* Singletary, K. G., Deviche, P., Strand, C., & Delville, Y. (2006). Distribution of orexin/hypocretin immunoreactivity in the brain of a male songbird, the house finch, Carpodacus mexicanus. Journal of chemical neuroanatomy, 32(2-4), 81-89. https://doi.org/10.1016/j.jchemneu.2006.05.003 Sex: Males Age: Adult (>P180) Method: IHC for orexin A and B
PVN	LoC	Non-Zebra Finch	**House Finch** *Haemorhous mexicanus* Singletary, K. G., Deviche, P., Strand, C., & Delville, Y. (2006). Distribution of orexin/hypocretin immunoreactivity in the brain of a male songbird, the house finch, Carpodacus mexicanus. Journal of chemical neuroanatomy, 32(2-4), 81-89. https://doi.org/10.1016/j.jchemneu.2006.05.003 Sex: Males Age: Adult (>P180) Method: IHC for orexin A and B
PVN	GP	Non-Zebra Finch	**House Finch** *Haemorhous mexicanus* Singletary, K. G., Deviche, P., Strand, C., & Delville, Y. (2006). Distribution of orexin/hypocretin immunoreactivity in the brain of a male songbird, the house finch, Carpodacus mexicanus. Journal of chemical neuroanatomy, 32(2-4), 81-89. https://doi.org/10.1016/j.jchemneu.2006.05.003 Sex: Males Age: Adult (>P180) Method: IHC for orexin A and B
PVN	LHy	Non-Zebra Finch	**House Finch** *Haemorhous mexicanus* Singletary, K. G., Deviche, P., Strand, C., & Delville, Y. (2006). Distribution of orexin/hypocretin immunoreactivity in the brain of a male songbird, the house finch, Carpodacus mexicanus. Journal of chemical neuroanatomy, 32(2-4), 81-89. https://doi.org/10.1016/j.jchemneu.2006.05.003 Sex: Males Age: Adult (>P180) Method: IHC for orexin A and B --- **White …
PVN	ICo	Non-Zebra Finch	**House Finch** *Haemorhous mexicanus* Singletary, K. G., Deviche, P., Strand, C., & Delville, Y. (2006). Distribution of orexin/hypocretin immunoreactivity in the brain of a male songbird, the house finch, Carpodacus mexicanus. Journal of chemical neuroanatomy, 32(2-4), 81-89. https://doi.org/10.1016/j.jchemneu.2006.05.003 Sex: Males Age: Adult (>P180) Method: IHC for orexin A and B --- **White …
PVN	SCN	Non-Zebra Finch	**House Finch** *Haemorhous mexicanus* Singletary, K. G., Deviche, P., Strand, C., & Delville, Y. (2006). Distribution of orexin/hypocretin immunoreactivity in the brain of a male songbird, the house finch, Carpodacus mexicanus. Journal of chemical neuroanatomy, 32(2-4), 81-89. https://doi.org/10.1016/j.jchemneu.2006.05.003 Sex: Males Age: Adult (>P180) Method: IHC for orexin A and B
R	Expiratory Muscles	Zebra Finch	**Zebra Finch** *Taeniopygia guttata* Wild, J. M., Li, D., & Eagleton, C. (1997). Projections of the dorsomedial nucleus of the intercollicular complex (DM) in relation to respiratory-vocal nuclei in the brainstem of pigeon (Columba livia) and zebra finch (Taeniopygia guttata). The Journal of comparative neurology, 377(3), 392-413. https://doi.org/10.1002/(sici)1096-9861(19970120)377:3<392::aid-c…
R	DMHp	Non-Zebra Finch	**Black-capped Chickadee** *Poecile atricapillus* Applegate, M. C., Gutnichenko, K. S., & Aronov, D. (2023). Topography of inputs into the hippocampal formation of a food-caching bird. Journal of Comparative Neurology, 531, 1669-1688. https://doi.org/10.1002/cne.25533 Sex: Undetermined Age: Adult (>P120) Method: CTB
R	MV	Zebra Finch|Non-Zebra Finch	**Zebra Finch** *Taeniopygia guttata* Wild, J. M., & Krützfeldt, N. E. (2012). Trigeminal and telencephalic projections to jaw and other upper vocal tract premotor neurons in songbirds: sensorimotor circuitry for beak movements during singing. The Journal of comparative neurology, 520(3), 590-605. https://doi.org/10.1002/cne.22752 Sex: Males Age: Adult Method: CTB, BDA (10kDa) --- **Canary** *Ser…
R	MVIId	Zebra Finch|Non-Zebra Finch	**Zebra Finch** *Taeniopygia guttata* Wild, J. M., & Krützfeldt, N. E. (2012). Trigeminal and telencephalic projections to jaw and other upper vocal tract premotor neurons in songbirds: sensorimotor circuitry for beak movements during singing. The Journal of comparative neurology, 520(3), 590-605. https://doi.org/10.1002/cne.22752 Sex: Males Age: Adult Method: CTB, BDA (10kDa) --- **Canary** *Ser…
R	Inspiratory Muscles	Zebra Finch	**Zebra Finch** *Taeniopygia guttata* Reinke, H. and Wild, J.M. (1998), Identification and connections of inspiratory premotor neurons in songbirds and budgerigar. J. Comp. Neurol., 391: 147-163. https://doi.org/10.1002/(SICI)1096-9861(19980209)391:2<147::AID-CNE1>3.0.CO;2-2 Sex: Male Age: Not Reported Method: BDA (10kDa)
R	POM	Non-Zebra Finch	**European Starling** *Sturnus vulgaris* Riters, L. V., & Alger, S. J. (2004). Neuroanatomical evidence for indirect connections between the medial preoptic nucleus and the song control system: possible neural substrates for sexually motivated song. Cell and tissue research, 316(1), 35-44. https://doi.org/10.1007/s00441-003-0838-6 Sex: Males Age: Adult Method: BDA
R	PAm	Zebra Finch	**Zebra Finch** *Taeniopygia guttata* Reinke, H. and Wild, J.M. (1998), Identification and connections of inspiratory premotor neurons in songbirds and budgerigar. J. Comp. Neurol., 391: 147-163. https://doi.org/10.1002/(SICI)1096-9861(19980209)391:2<147::AID-CNE1>3.0.CO;2-2 Sex: Male Age: Not Reported Method: BDA (10kDa)
RA	Ov (Shell)	Non-Zebra Finch	**Bengalese Finch** *Lonchura striata domestica* Zeng, S., Zhang, X., Peng, W., & Zuo, M. (2004). Immunohistochemistry and neural connectivity of the Ov shell in the songbird and their evolutionary implications. The Journal of comparative neurology, 470(2), 192-209. https://doi.org/10.1002/cne.11042 Sex: Undetermined Age: Adult Method: BDA (3kDa)
RA	IOS	Zebra Finch	**Zebra Finch** *Taeniopygia guttata* Reinke, H. and Wild, J.M. (1998), Identification and connections of inspiratory premotor neurons in songbirds and budgerigar. J. Comp. Neurol., 391: 147-163. https://doi.org/10.1002/(SICI)1096-9861(19980209)391:2<147::AID-CNE1>3.0.CO;2-2 Sex: Not Reported Age: Not Reported Method: BDA and CTB --- **Zebra Finch** *Taeniopygia guttata* Wild J. M. (1993). Descen…
RA	VP	Zebra Finch	**Zebra Finch** *Taeniopygia guttata* Chen, R., Puzerey, P. A., Roeser, A. C., Riccelli, T. E., Podury, A., Maher, K., Farhang, A. R., & Goldberg, J. H. (2019). Songbird Ventral Pallidum Sends Diverse Performance Error Signals to Dopaminergic Midbrain. Neuron, 103(2), 266-276.e4. https://doi.org/10.1016/j.neuron.2019.04.038 Sex: Males Age: Adult Method: scAAV9 GFP --- **Zebra Finch** *Taeniopygia…
RA	PBvl	Zebra Finch	**Zebra Finch** *Taeniopygia guttata* Wild, J. M., Kubke, M. F., & Mooney, R. (2009). Avian nucleus retroambigualis: cell types and projections to other respiratory-vocal nuclei in the brain of the zebra finch (Taeniopygia guttata). The Journal of comparative neurology, 512(6), 768-783. https://doi.org/10.1002/cne.21932 Sex: Males Age: Adult Method: BDA (10kDa)
RA	HVC	Zebra Finch	**Zebra Finch** *Taeniopygia guttata* Shaughnessy, D. W., Hyson, R. L., Bertram, R., Wu, W., & Johnson, F. (2019). Female zebra finches do not sing yet share neural pathways necessary for singing in males. The Journal of comparative neurology, 527(4), 843-855. https://doi.org/10.1002/cne.24569 Sex: Males Age: Adult Method: DiO, DiI or rhodamine-conjugated dextran, --- **Zebra Finch** *Taeniopygia…
RA	nA	Zebra Finch	**Zebra Finch** *Taeniopygia guttata* Wild J. M. (1993). Descending projections of the songbird nucleus robustus archistriatalis. The Journal of comparative neurology, 338(2), 225-241. https://doi.org/10.1002/cne.903380207 Sex: Males Age: Adult Method: Either 2% CTB-HRP, unconjugated CTB, or 10% BDA
RA	RVL	Zebra Finch	**Zebra Finch** *Taeniopygia guttata* Reinke, H. and Wild, J.M. (1998), Identification and connections of inspiratory premotor neurons in songbirds and budgerigar. J. Comp. Neurol., 391: 147-163. https://doi.org/10.1002/(SICI)1096-9861(19980209)391:2<147::AID-CNE1>3.0.CO;2-2 Sex: Not Reported Age: Not Reported Method: BDA and CTB --- **Zebra Finch** *Taeniopygia guttata* Wild J. M. (1993). Descen…
RA	RAm	Zebra Finch|Non-Zebra Finch	**Zebra Finch** *Taeniopygia guttata* Reinke, H. and Wild, J.M. (1998), Identification and connections of inspiratory premotor neurons in songbirds and budgerigar. J. Comp. Neurol., 391: 147-163. https://doi.org/10.1002/(SICI)1096-9861(19980209)391:2<147::AID-CNE1>3.0.CO;2-2 Sex: Not Reported Age: Not Reported Method: BDA and CTB --- **Zebra Finch** *Taeniopygia guttata* Vates, G. E., Vicario, D.…
RA	DLM	Zebra Finch|Non-Zebra Finch	**Bengalese Finch** *Lonchura striata domestica* Tobari Y, Okumura T, Tani J, and K Okanoya (2006). Non-singing female Bengalese Finches (Lonchura striata var. domestica) possess neuronal projections connecting a song learning region to a song motor region. Ornithol Sci 5(1): 47-55. https://doi.org/10.2326/osj.5.47 Sex: Males and Females Age: Adult (>P180) Method: BDA (3kDa or 10kDa) --- **Zebra …
RA	nXII(ts)	Zebra Finch|Non-Zebra Finch	**Zebra Finch** *Taeniopygia guttata* Reinke, H. and Wild, J.M. (1998), Identification and connections of inspiratory premotor neurons in songbirds and budgerigar. J. Comp. Neurol., 391: 147-163. https://doi.org/10.1002/(SICI)1096-9861(19980209)391:2<147::AID-CNE1>3.0.CO;2-2 Sex: Not Reported Age: Not Reported Method: BDA and CTB --- **Zebra Finch** *Taeniopygia guttata* Vates, G. E., Vicario, D.…
RA	DM	Zebra Finch|Non-Zebra Finch	**Zebra Finch** *Taeniopygia guttata* Reinke, H. and Wild, J.M. (1998), Identification and connections of inspiratory premotor neurons in songbirds and budgerigar. J. Comp. Neurol., 391: 147-163. https://doi.org/10.1002/(SICI)1096-9861(19980209)391:2<147::AID-CNE1>3.0.CO;2-2 Sex: Not Reported Age: Not Reported Method: BDA and CTB --- **Zebra Finch** *Taeniopygia guttata* Striedter, G. F., & Vu, E…
RA	DMP	Zebra Finch|Non-Zebra Finch	**Zebra Finch** *Taeniopygia guttata* Foster, E. F., Mehta, R. P., & Bottjer, S. W. (1997). Axonal connections of the medial magnocellular nucleus of the anterior neostriatum in zebra finches. The Journal of comparative neurology, 382(3), 364-381. https://doi.org/10.1002/cne.903820305 Sex: Males Age: Adult Method: DiI --- **Zebra Finch** *Taeniopygia guttata* Vates, G. E., Vicario, D. S., & Notte…
RA	Ov (Core)	Zebra Finch	**Zebra Finch** *Taeniopygia guttata* Vates, G. E., Broome, B. M., Mello, C. V., & Nottebohm, F. (1996). Auditory pathways of caudal telencephalon and their relation to the song system of adult male zebra finches. The Journal of comparative neurology, 366(4), 613-642. https://doi.org/10.1002/(SICI)1096-9861(19960318)366:4<613::AID-CNE5>3.0.CO;2-7 Sex: Males Age: Adult (>P120) Method: BDA (3kDa) o…
RA	STN	Zebra Finch	**Zebra Finch** *Taeniopygia guttata* Das, A., & Goldberg, J. H. (2022). Songbird subthalamic neurons project to dopaminergic midbrain and exhibit singing-related activity. Journal of neurophysiology, 127(2), 373-383. https://doi.org/10.1152/jn.00254.2021 Sex: Males Age: Adult (>P90) Method: AAV9
RA	PAm	Zebra Finch	**Zebra Finch** *Taeniopygia guttata* Reinke, H. and Wild, J.M. (1998), Identification and connections of inspiratory premotor neurons in songbirds and budgerigar. J. Comp. Neurol., 391: 147-163. https://doi.org/10.1002/(SICI)1096-9861(19980209)391:2<147::AID-CNE1>3.0.CO;2-2 Sex: Not Reported Age: Not Reported Method: BDA and CTB
RA Cup	Ov (Shell)	Zebra Finch|Non-Zebra Finch	**Zebra Finch** *Taeniopygia guttata* Mello, C. V., Vates, G. E., Okuhata, S., & Nottebohm, F. (1998). Descending auditory pathways in the adult male zebra finch *Taeniopygia guttata*. The Journal of comparative neurology, 395(2), 137-160. https://doi.org/10.1002/(SICI)1096-9861(19980601)395:2<137::AID-CNE1>3.0.CO;2-3 Sex: Males Age: Adult (>P120) Method: Phaseolus vulgaris-leucoagglutinin (PHA-L…
RA Cup	Ov (Core)	Zebra Finch	**Zebra Finch** *Taeniopygia guttata* Mello, C. V., Vates, G. E., Okuhata, S., & Nottebohm, F. (1998). Descending auditory pathways in the adult male zebra finch *Taeniopygia guttata*. The Journal of comparative neurology, 395(2), 137-160. https://doi.org/10.1002/(SICI)1096-9861(19980601)395:2<137::AID-CNE1>3.0.CO;2-3 Sex: Males Age: Adult (>P120) Method: Phaseolus vulgaris-leucoagglutinin (PHA-L…
RA Cup	ICo	Zebra Finch	**Zebra Finch** *Taeniopygia guttata* Mello, C. V., Vates, G. E., Okuhata, S., & Nottebohm, F. (1998). Descending auditory pathways in the adult male zebra finch *Taeniopygia guttata*. The Journal of comparative neurology, 395(2), 137-160. https://doi.org/10.1002/(SICI)1096-9861(19980601)395:2<137::AID-CNE1>3.0.CO;2-3 Sex: Males Age: Adult (>P120) Method: Phaseolus vulgaris-leucoagglutinin (PHA-L…
RA Cup	nTOv	Zebra Finch	**Zebra Finch** *Taeniopygia guttata* Mello, C. V., Vates, G. E., Okuhata, S., & Nottebohm, F. (1998). Descending auditory pathways in the adult male zebra finch *Taeniopygia guttata*. The Journal of comparative neurology, 395(2), 137-160. https://doi.org/10.1002/(SICI)1096-9861(19980601)395:2<137::AID-CNE1>3.0.CO;2-3 Sex: Males Age: Adult (>P120) Method: Phaseolus vulgaris-leucoagglutinin (PHA-L)
RA Cup	LLV	Zebra Finch	**Zebra Finch** *Taeniopygia guttata* Mello, C. V., Vates, G. E., Okuhata, S., & Nottebohm, F. (1998). Descending auditory pathways in the adult male zebra finch *Taeniopygia guttata*. The Journal of comparative neurology, 395(2), 137-160. https://doi.org/10.1002/(SICI)1096-9861(19980601)395:2<137::AID-CNE1>3.0.CO;2-3 Sex: Males Age: Adult (>P120) Method: Phaseolus vulgaris-leucoagglutinin (PHA-L)
RA Cup	MLd	Zebra Finch	**Zebra Finch** *Taeniopygia guttata* Mello, C. V., Vates, G. E., Okuhata, S., & Nottebohm, F. (1998). Descending auditory pathways in the adult male zebra finch *Taeniopygia guttata*. The Journal of comparative neurology, 395(2), 137-160. https://doi.org/10.1002/(SICI)1096-9861(19980601)395:2<137::AID-CNE1>3.0.CO;2-3 Sex: Males Age: Adult (>P120) Method: Phaseolus vulgaris-leucoagglutinin (PHA-L…
RAm	PAm	Zebra Finch	**Zebra Finch** *Taeniopygia guttata* Reinke, H. and Wild, J.M. (1998), Identification and connections of inspiratory premotor neurons in songbirds and budgerigar. J. Comp. Neurol., 391: 147-163. https://doi.org/10.1002/(SICI)1096-9861(19980209)391:2<147::AID-CNE1>3.0.CO;2-2 Sex: Not Reported Age: Not Reported Method: BDA and CTB --- **Zebra Finch** *Taeniopygia guttata* Wild, J. M., Kubke, M. F.…
RAm	nXII(ts)	Zebra Finch	**Zebra Finch** *Taeniopygia guttata* Reinke, H. and Wild, J.M. (1998), Identification and connections of inspiratory premotor neurons in songbirds and budgerigar. J. Comp. Neurol., 391: 147-163. https://doi.org/10.1002/(SICI)1096-9861(19980209)391:2<147::AID-CNE1>3.0.CO;2-2 Sex: Not Reported Age: Not Reported Method: BDA and CTB --- **Zebra Finch** *Taeniopygia guttata* Wild, J. M., Kubke, M. F.…
RAm	PBvl	Zebra Finch	**Zebra Finch** *Taeniopygia guttata* Wild, J. M., Kubke, M. F., & Mooney, R. (2009). Avian nucleus retroambigualis: cell types and projections to other respiratory-vocal nuclei in the brain of the zebra finch (Taeniopygia guttata). The Journal of comparative neurology, 512(6), 768-783. https://doi.org/10.1002/cne.21932 Sex: Males Age: Adult Method: BDA (10kDa)
RAm	PVN	Zebra Finch	**Zebra Finch** *Taeniopygia guttata* Wild, J. M., Kubke, M. F., & Mooney, R. (2009). Avian nucleus retroambigualis: cell types and projections to other respiratory-vocal nuclei in the brain of the zebra finch (Taeniopygia guttata). The Journal of comparative neurology, 512(6), 768-783. https://doi.org/10.1002/cne.21932 Sex: Males Age: Adult Method: BDA (10kDa)
RAm	DM	Zebra Finch	**Zebra Finch** *Taeniopygia guttata* Reinke, H. and Wild, J.M. (1998), Identification and connections of inspiratory premotor neurons in songbirds and budgerigar. J. Comp. Neurol., 391: 147-163. https://doi.org/10.1002/(SICI)1096-9861(19980209)391:2<147::AID-CNE1>3.0.CO;2-2 Sex: Not Reported Age: Not Reported Method: BDA and CTB --- **Zebra Finch** *Taeniopygia guttata* Wild, J. M., Kubke, M. F.…
RAm	RVL	Zebra Finch	**Zebra Finch** *Taeniopygia guttata* Wild, J. M., Kubke, M. F., & Mooney, R. (2009). Avian nucleus retroambigualis: cell types and projections to other respiratory-vocal nuclei in the brain of the zebra finch (Taeniopygia guttata). The Journal of comparative neurology, 512(6), 768-783. https://doi.org/10.1002/cne.21932 Sex: Males Age: Adult Method: BDA (10kDa)
RAm	nTS	Zebra Finch	**Zebra Finch** *Taeniopygia guttata* Wild, J. M., Kubke, M. F., & Mooney, R. (2009). Avian nucleus retroambigualis: cell types and projections to other respiratory-vocal nuclei in the brain of the zebra finch (Taeniopygia guttata). The Journal of comparative neurology, 512(6), 768-783. https://doi.org/10.1002/cne.21932 Sex: Males Age: Adult Method: BDA (10kDa)
RAm	Expiratory Muscles	Zebra Finch	**Zebra Finch** *Taeniopygia guttata* Wild, J. M., Kubke, M. F., & Mooney, R. (2009). Avian nucleus retroambigualis: cell types and projections to other respiratory-vocal nuclei in the brain of the zebra finch (Taeniopygia guttata). The Journal of comparative neurology, 512(6), 768-783. https://doi.org/10.1002/cne.21932 Sex: Males Age: Adult Method: BDA (10kDa)
RAm	Cloacal Muscles	Non-Zebra Finch	**Canary** *Serinus canaria* Wild, J. M., & Botelho, J. F. (2015). Involvement of the avian song system in reproductive behaviour. Biology letters, 11(12), 20150773. https://doi.org/10.1098/rsbl.2015.0773 Sex: Males and Females Age: Not Reported Method: CTB
RAm	MLd	Zebra Finch	**Zebra Finch** *Taeniopygia guttata* Faunes, M., & Wild, J. M. (2017). The ascending projections of the nuclei of the descending trigeminal tract (nTTD) in the zebra finch *Taeniopygia guttata). The Journal of comparative neurology, 525(13), 2832-2846. https://doi.org/10.1002/cne.24247 Sex: Undetermined Age: Adult Method: retrograde tracer BDA or CTB
RAm	Air Sacs	Zebra Finch	**Zebra Finch** *Taeniopygia guttata* Kubke, M. F., Ross, J. M., & Wild, J. M. (2004). Vagal innervation of the air sacs in a songbird, Taenopygia guttata. Journal of anatomy, 204(4), 283-292. https://doi.org/10.1111/j.0021-8782.2004.00286.x Sex: Not Reported Age: Not Reported Method: CTB
RAm	MV	Zebra Finch|Non-Zebra Finch	**Zebra Finch** *Taeniopygia guttata* Wild, J. M., & Krützfeldt, N. E. (2012). Trigeminal and telencephalic projections to jaw and other upper vocal tract premotor neurons in songbirds: sensorimotor circuitry for beak movements during singing. The Journal of comparative neurology, 520(3), 590-605. https://doi.org/10.1002/cne.22752 Sex: Males Age: Adult Method: CTB, BDA (10kDa) --- **Canary** *Ser…
RAm	nTTDc	Zebra Finch	**Zebra Finch** *Taeniopygia guttata* Wild, J. M., Kubke, M. F., & Mooney, R. (2009). Avian nucleus retroambigualis: cell types and projections to other respiratory-vocal nuclei in the brain of the zebra finch (Taeniopygia guttata). The Journal of comparative neurology, 512(6), 768-783. https://doi.org/10.1002/cne.21932 Sex: Males Age: Adult Method: BDA (10kDa)
RAm	IOS	Zebra Finch	**Zebra Finch** *Taeniopygia guttata* Wild, J. M., Kubke, M. F., & Mooney, R. (2009). Avian nucleus retroambigualis: cell types and projections to other respiratory-vocal nuclei in the brain of the zebra finch (Taeniopygia guttata). The Journal of comparative neurology, 512(6), 768-783. https://doi.org/10.1002/cne.21932 Sex: Males Age: Adult Method: BDA (10kDa)
Retina DGCs	nBOR	Zebra Finch	**Zebra Finch** *Taeniopygia guttata* Gaede, A. H., Gutiérrez-Ibáñez, C., Wu, P. H., Pilon, M. C., Altshuler, D. L., & Wylie, D. R. (2024). Topography of visual and somatosensory inputs to the pontine nuclei in zebra finches *Taeniopygia guttata). The Journal of comparative neurology, 532(2), e25556. https://doi.org/10.1002/cne.25556 Sex: Males Age: Adult Method: anterograde tracing Texas red and…
Retina DGCs	SCN	Non-Zebra Finch	**House Sparrow** *Passer domesticus* Cassone, V. M., & Moore, R. Y. (1987). Retinohypothalamic projection and suprachiasmatic nucleus of the house sparrow, Passer domesticus. The Journal of comparative neurology, 266(2), 171-182. https://doi.org/10.1002/cne.902660204 Sex: Undetermined Age: Adult Method: proline
Retina DGCs	LM	Zebra Finch	**Zebra Finch** *Taeniopygia guttata* Gaede, A. H., Gutiérrez-Ibáñez, C., Wu, P. H., Pilon, M. C., Altshuler, D. L., & Wylie, D. R. (2024). Topography of visual and somatosensory inputs to the pontine nuclei in zebra finches *Taeniopygia guttata). The Journal of comparative neurology, 532(2), e25556. https://doi.org/10.1002/cne.25556 Sex: Males Age: Adult Method: anterograde tracing Texas red and…
Retina RGCs	SCN	Non-Zebra Finch	**House Sparrow** *Passer domesticus* Cassone, V. M., & Moore, R. Y. (1987). Retinohypothalamic projection and suprachiasmatic nucleus of the house sparrow, Passer domesticus. The Journal of comparative neurology, 266(2), 171-182. https://doi.org/10.1002/cne.902660204 Sex: Undetermined Age: Adult Method: proline --- **House Sparrow** *Passer domesticus* Hartwig H. G. (1974). Electron microscopic …
Retina RGCs	GLv	Zebra Finch|Non-Zebra Finch	**Zebra Finch** *Taeniopygia guttata* Gaede, A. H., Gutiérrez-Ibáñez, C., Wu, P. H., Pilon, M. C., Altshuler, D. L., & Wylie, D. R. (2024). Topography of visual and somatosensory inputs to the pontine nuclei in zebra finches *Taeniopygia guttata). The Journal of comparative neurology, 532(2), e25556. https://doi.org/10.1002/cne.25556 Sex: Males Age: Adult Method: anterograde tracing Texas red and…
Retina RGCs	LM	Zebra Finch	**Zebra Finch** *Taeniopygia guttata* Gaede, A. H., Gutiérrez-Ibáñez, C., Wu, P. H., Pilon, M. C., Altshuler, D. L., & Wylie, D. R. (2024). Topography of visual and somatosensory inputs to the pontine nuclei in zebra finches *Taeniopygia guttata). The Journal of comparative neurology, 532(2), e25556. https://doi.org/10.1002/cne.25556 Sex: Males Age: Adult Method: anterograde tracing Texas red and…
Retina RGCs	OT	Zebra Finch|Non-Zebra Finch	**Zebra Finch** *Taeniopygia guttata* Gaede, A. H., Gutiérrez-Ibáñez, C., Wu, P. H., Pilon, M. C., Altshuler, D. L., & Wylie, D. R. (2024). Topography of visual and somatosensory inputs to the pontine nuclei in zebra finches *Taeniopygia guttata). The Journal of comparative neurology, 532(2), e25556. https://doi.org/10.1002/cne.25556 Sex: Males Age: Adult Method: anterograde tracing Texas red and…
Retina RGCs	nBOR	Non-Zebra Finch	**Jackdaw** *Corvus monedula* Meier R. E. (1973). Autoradiographic evidence for a direct retino-hypothalamic projection in the avian brain. Brain research, 53(2), 417-421. https://doi.org/10.1016/0006-8993(73)90226-6 Sex: Not Reported Age: Not Reported Method: proline
Retina RGCs	EM	Non-Zebra Finch	**Jackdaw** *Corvus monedula* Meier R. E. (1973). Autoradiographic evidence for a direct retino-hypothalamic projection in the avian brain. Brain research, 53(2), 417-421. https://doi.org/10.1016/0006-8993(73)90226-6 Sex: Not Reported Age: Not Reported Method: proline
RPcdl	MVIId	Zebra Finch|Non-Zebra Finch	**Zebra Finch** *Taeniopygia guttata* Wild, J. M., & Krützfeldt, N. E. (2012). Trigeminal and telencephalic projections to jaw and other upper vocal tract premotor neurons in songbirds: sensorimotor circuitry for beak movements during singing. The Journal of comparative neurology, 520(3), 590-605. https://doi.org/10.1002/cne.22752 Sex: Males Age: Adult Method: CTB, BDA (10kDa) --- **Canary** *Ser…
RPcdl	MV	Zebra Finch|Non-Zebra Finch	**Zebra Finch** *Taeniopygia guttata* Wild, J. M., & Krützfeldt, N. E. (2012). Trigeminal and telencephalic projections to jaw and other upper vocal tract premotor neurons in songbirds: sensorimotor circuitry for beak movements during singing. The Journal of comparative neurology, 520(3), 590-605. https://doi.org/10.1002/cne.22752 Sex: Males Age: Adult Method: CTB, BDA (10kDa) --- **Canary** *Ser…
RPcvm	MV	Zebra Finch|Non-Zebra Finch	**Zebra Finch** *Taeniopygia guttata* Wild, J. M., & Krützfeldt, N. E. (2012). Trigeminal and telencephalic projections to jaw and other upper vocal tract premotor neurons in songbirds: sensorimotor circuitry for beak movements during singing. The Journal of comparative neurology, 520(3), 590-605. https://doi.org/10.1002/cne.22752 Sex: Males Age: Adult Method: CTB, BDA (10kDa) --- **Canary** *Ser…
RPcvm	MVIIv	Zebra Finch|Non-Zebra Finch	**Zebra Finch** *Taeniopygia guttata* Wild, J. M., & Krützfeldt, N. E. (2012). Trigeminal and telencephalic projections to jaw and other upper vocal tract premotor neurons in songbirds: sensorimotor circuitry for beak movements during singing. The Journal of comparative neurology, 520(3), 590-605. https://doi.org/10.1002/cne.22752 Sex: Males Age: Adult Method: CTB, BDA (10kDa) --- **Canary** *Ser…
RPcvm	nXII(l)	Zebra Finch|Non-Zebra Finch	**Zebra Finch** *Taeniopygia guttata* Wild, J. M., & Krützfeldt, N. E. (2012). Trigeminal and telencephalic projections to jaw and other upper vocal tract premotor neurons in songbirds: sensorimotor circuitry for beak movements during singing. The Journal of comparative neurology, 520(3), 590-605. https://doi.org/10.1002/cne.22752 Sex: Males Age: Adult Method: CTB, BDA (10kDa) --- **Canary** *Ser…
RPcvm	RAm	Zebra Finch|Non-Zebra Finch	**Zebra Finch** *Taeniopygia guttata* Wild, J. M., & Krützfeldt, N. E. (2012). Trigeminal and telencephalic projections to jaw and other upper vocal tract premotor neurons in songbirds: sensorimotor circuitry for beak movements during singing. The Journal of comparative neurology, 520(3), 590-605. https://doi.org/10.1002/cne.22752 Sex: Males Age: Adult Method: CTB, BDA (10kDa) --- **Canary** *Ser…
RPcvm	nIXr	Zebra Finch|Non-Zebra Finch	**Zebra Finch** *Taeniopygia guttata* Wild, J. M., & Krützfeldt, N. E. (2012). Trigeminal and telencephalic projections to jaw and other upper vocal tract premotor neurons in songbirds: sensorimotor circuitry for beak movements during singing. The Journal of comparative neurology, 520(3), 590-605. https://doi.org/10.1002/cne.22752 Sex: Males Age: Adult Method: CTB, BDA (10kDa) --- **Canary** *Ser…
RPcvm	MVIId	Zebra Finch|Non-Zebra Finch	**Zebra Finch** *Taeniopygia guttata* Wild, J. M., & Krützfeldt, N. E. (2012). Trigeminal and telencephalic projections to jaw and other upper vocal tract premotor neurons in songbirds: sensorimotor circuitry for beak movements during singing. The Journal of comparative neurology, 520(3), 590-605. https://doi.org/10.1002/cne.22752 Sex: Males Age: Adult Method: CTB, BDA (10kDa) --- **Canary** *Ser…
RS	DT (CbN)	Zebra Finch|Non-Zebra Finch	**Zebra Finch** *Taeniopygia guttata* Vates, G. E., Vicario, D. S., & Nottebohm, F. (1997). Reafferent thalamo- "cortical" loops in the song system of oscine songbirds. The Journal of comparative neurology, 380(2), 275-290. https://doi.org/10.1002/(SICI)1096-9861(19970407)380:2<275::AID-CNE9>3.0.CO;2-0 Sex: Males Age: Adult Method: Anterograde tracing with BA, RDA, or fluorescein-linked dextran a…
RS	Uva	Zebra Finch	**Zebra Finch** *Taeniopygia guttata* Akutagawa, E., & Konishi, M. (2005). Connections of thalamic modulatory centers to the vocal control system of the zebra finch. Proceedings of the National Academy of Sciences of the United States of America, 102(39), 14086-14091. https://doi.org/10.1073/pnas.0506774102 Sex: Males Age: Adult Method: anterograde or retrograde labeling with BDA or Alexa Fluor 4…
RS	Ov (Core)	Zebra Finch	**Zebra Finch** *Taeniopygia guttata* Wild J. M. (2017). The ventromedial hypothalamic nucleus in the zebra finch *Taeniopygia guttata): Afferent and efferent projections in relation to the control of reproductive behavior. The Journal of comparative neurology, 525(12), 2657-2676. https://doi.org/10.1002/cne.24225 Sex: Males and Females Age: Adult Method: CTB
[truncated: 147 more rows]
