# Supplementary material for: The Songbird Connectome (OSCINE-NET.ORG): Structure-Function Organization Beyond the Canonical Vocal Control Network
Source: Research Square preprint supplement (doi:10.21203/rs.3.rs-4809794/v1), 2024-08-27
Supplement: Supplementary file 2 [file 40b548769d949505e056242c.xlsx]

## Sheet: Sheet1
Node	Degree	Indegree	Outdegree	Betweenness Centrality	Degree Centrality	Closeness Centrality	Clustering Coefficient
NCL	65	49	16	0.108	0.35	0.424	0.135
HA (Rostral)	57	17	40	0.097	0.307	0.345	0.091
AI	52	18	34	0.101	0.28	0.338	0.121
PVN	48	4	44	0.066	0.258	0.283	0.071
POM	38	13	25	0.073	0.204	0.314	0.106
AIV	38	10	28	0.025	0.204	0.305	0.196
OT	36	11	25	0.114	0.194	0.334	0.063
Uva	35	21	14	0.088	0.188	0.348	0.079
DLHp	35	11	24	0.047	0.188	0.316	0.145
NIL	34	25	9	0.028	0.183	0.376	0.222
HA (Caudal)	33	14	19	0.042	0.177	0.284	0.122
Area X	31	29	2	0.005	0.167	0.36	0.132
HVC	29	17	12	0.024	0.156	0.335	0.193
PAm	29	16	13	0.044	0.156	0.313	0.156
RA	29	14	15	0.05	0.156	0.331	0.156
Ov (Shell)	28	11	17	0.033	0.151	0.314	0.189
VP	27	17	10	0.027	0.145	0.361	0.164
CLM	27	10	17	0.017	0.145	0.31	0.29
LoC	27	5	22	0.018	0.145	0.284	0.201
NFL	26	16	10	0.031	0.14	0.347	0.206
VTA	26	14	12	0.022	0.14	0.33	0.198
ICo	25	19	6	0.019	0.134	0.367	0.147
nTTDc	25	11	14	0.033	0.134	0.306	0.16
Ov (Core)	24	16	8	0.015	0.129	0.326	0.132
RAm	24	10	14	0.054	0.129	0.303	0.192
SN	24	10	14	0.011	0.129	0.305	0.232
AD	24	8	16	0.006	0.129	0.306	0.302
MSt	23	19	4	0.005	0.124	0.332	0.176
GP	23	7	16	0.02	0.124	0.307	0.138
NCM	22	15	7	0.005	0.118	0.326	0.256
nTTDi	22	7	15	0.011	0.118	0.233	0.178
L3	22	7	15	0.005	0.118	0.283	0.371
VMH	21	16	5	0.02	0.113	0.355	0.185
DMP	21	15	6	0.014	0.113	0.361	0.174
L1	21	7	14	0.006	0.113	0.283	0.39
TnA	21	6	15	0.011	0.113	0.293	0.186
nBOR	21	3	18	0.02	0.113	0.194	0.062
CSt	20	17	3	0.005	0.108	0.369	0.261
DMHp	20	15	5	0.015	0.108	0.333	0.242
LLV	20	6	14	0.028	0.108	0.285	0.191
CG	19	13	6	0.019	0.102	0.348	0.169
DM	19	8	11	0.015	0.102	0.327	0.298
MLd	18	14	4	0.007	0.097	0.326	0.182
LSt	18	14	4	0.011	0.097	0.355	0.287
E	18	12	6	0.018	0.097	0.319	0.132
nTOv	18	10	8	0.011	0.097	0.314	0.233
nTTDo	18	7	11	0.008	0.097	0.28	0.227
paraHVC	18	7	11	0.007	0.097	0.317	0.192
HD	18	7	11	0.007	0.097	0.293	0.35
DCN	18	6	12	0.035	0.097	0.279	0.082
RA Cup	17	11	6	0.014	0.091	0.326	0.254
Cu	16	7	9	0.013	0.086	0.292	0.147
LMAN	16	6	10	0.007	0.086	0.293	0.39
IMM	15	4	11	0.005	0.081	0.291	0.325
DIVA	14	12	2	0.012	0.075	0.309	0.159
CuE	14	10	4	0.008	0.075	0.285	0.159
PrV	14	9	5	0.015	0.075	0.235	0.176
ILM	14	8	6	0.003	0.075	0.327	0.438
nTS	13	9	4	0.014	0.07	0.235	0.136
SO	13	6	7	0.006	0.07	0.25	0.34
NIf	13	6	7	0.005	0.07	0.324	0.3
LM	13	4	9	0.026	0.07	0.246	0.162
Bas	12	8	4	0.017	0.065	0.296	0.18
MV	12	7	5	0.02	0.065	0.295	0.086
PL	12	7	5	0.012	0.065	0.325	0.109
AM	12	6	6	0.005	0.065	0.309	0.238
HVC Shelf	12	5	7	0	0.065	0.271	0.492
IO	11	8	3	0.005	0.059	0.285	0.218
DLM	11	6	5	0.007	0.059	0.295	0.358
G	11	5	6	0.002	0.059	0.275	0.209
L2a	11	5	6	0	0.059	0.261	0.608
L2b	11	5	6	0	0.059	0.269	0.596
Tongue	11	4	7	0.017	0.059	0.225	0.136
OCb	10	9	1	0.005	0.054	0.295	0.167
MS	10	7	3	0.002	0.054	0.282	0.405
NIM	10	6	4	0.004	0.054	0.276	0.25
RVL	10	5	5	0.002	0.054	0.307	0.561
PM	9	8	1	0.002	0.048	0.289	0.139
CDL	9	6	3	0.001	0.048	0.301	0.636
Rt	9	5	4	0.009	0.048	0.271	0.097
PT	9	4	5	0.009	0.048	0.289	0.294
LLD	9	4	5	0.002	0.048	0.229	0.347
FRL	9	4	5	0.002	0.048	0.29	0.471
RPcvm	9	3	6	0.024	0.048	0.272	0.118
NL	9	3	6	0.002	0.048	0.228	0.397
NA	9	3	6	0.002	0.048	0.228	0.412
R	9	2	7	0.007	0.048	0.261	0.118
VbC	8	7	1	0.006	0.043	0.28	0.143
LLI	8	7	1	0.001	0.043	0.252	0.339
MVIId	8	6	2	0.007	0.043	0.298	0.111
NR	8	6	2	0.006	0.043	0.303	0.148
SpM	8	6	2	0.002	0.043	0.299	0.222
LHy	8	6	2	0.001	0.043	0.291	0.268
STN	8	5	3	0.002	0.043	0.288	0.327
nXII(ts)	8	4	4	0.007	0.043	0.29	0.538
CMM	8	4	4	0.001	0.043	0.274	0.577
Lower Jaw	8	2	6	0.005	0.043	0.225	0.214
SRt	8	2	6	0.005	0.043	0.257	0.196
MMAN	8	2	6	0.001	0.043	0.265	0.352
Expiratory Muscles	7	7	0	0	0.038	0.272	0.048
PBvl	7	5	2	0	0.038	0.296	0.711
NM	7	4	3	0.006	0.038	0.228	0.425
GLv	7	4	3	0.001	0.038	0.266	0.225
SCE	7	4	3	0.001	0.038	0.276	0.325
LS	7	4	3	0.001	0.038	0.277	0.45
IHA	7	3	4	0.001	0.038	0.249	0.238
Retina RGCs	7	1	6	0.004	0.038	0.191	0.167
Upper Jaw	7	1	6	0.002	0.038	0.222	0.262
EM	6	6	0	0	0.032	0.279	0.2
MHb	6	4	2	0.001	0.032	0.277	0.167
BSTL	6	4	2	0.001	0.032	0.265	0.385
LHb	6	4	2	0	0.032	0.283	0.267
Av	6	4	2	0	0.032	0.29	0.538
IOS	6	4	2	0	0.032	0.29	0.808
PoA	6	3	3	0.001	0.032	0.256	0.667
HI	6	3	3	0	0.032	0.236	0.357
SC	6	2	4	0.001	0.032	0.266	0.2
RS	6	1	5	0.001	0.032	0.229	0.1
DLL	6	1	5	0.001	0.032	0.243	0.233
Lower Eyelid	6	0	6	0	0.032	0	0.367
NAc	5	4	1	0	0.027	0.272	0.25
FRM	5	4	1	0	0.027	0.29	0.45
POA	5	3	2	0	0.027	0.265	0.233
DIP	5	3	2	0.001	0.027	0.265	0.25
VHp	5	3	2	0	0.027	0.248	0.75
VeS	5	2	3	0.007	0.027	0.257	0.15
MVL	5	2	3	0	0.027	0.265	0.375
Ipc	5	2	3	0	0.027	0.243	0.625
DT (CbN)	5	2	3	0.001	0.027	0.218	0
Wing	5	0	5	0	0.027	0	0.15
VeM	4	4	0	0	0.022	0.28	0.25
DLA	4	3	1	0.001	0.022	0.227	0.167
SpL	4	2	2	0.002	0.022	0.26	0.417
PPT	4	2	2	0	0.022	0.268	0.2
DLP	4	2	2	0	0.022	0.269	0.25
PPC	4	2	2	0.001	0.022	0.258	0.333
AA	4	2	2	0	0.022	0.292	0.4
NFM	4	2	2	0	0.022	0.265	0.5
RPcdl	4	2	2	0	0.022	0.252	0
BSTM	4	2	2	0	0.022	0.244	0.583
Imc	4	2	2	0	0.022	0.243	1
Retina DGCs	4	1	3	0.001	0.022	0.192	0.167
DMA	4	1	3	0.001	0.022	0.213	0.083
Syrinx	4	1	3	0.001	0.022	0.219	0.167
SPC	4	0	4	0	0.022	0	0.583
RPgc	3	3	0	0	0.016	0.291	0.333
ALp	3	3	0	0	0.016	0.278	0.167
Slu	3	3	0	0	0.016	0.271	0.5
SCN	3	3	0	0	0.016	0.222	0
Air Sacs	3	2	1	0	0.016	0.227	0.333
NDB	3	2	1	0	0.016	0.246	0.5
ION	3	1	2	0.01	0.016	0.243	0.167
IPS	3	1	2	0	0.016	0.244	0.333
SPT	3	1	2	0	0.016	0.244	0.333
nXII(l)	3	1	2	0	0.016	0.208	0.5
MVIIv	3	1	2	0.002	0.016	0.209	0
Ep	3	1	2	0	0.016	0.235	0.667
FLM	3	0	3	0	0.016	0	0.833
LPC	3	0	3	0	0.016	0	0
Pineal Gland	3	0	3	0	0.016	0	0.333
SHb	2	2	0	0	0.011	0.26	0.5
AH	2	2	0	0	0.011	0.251	0.5
Inspiratory Muscles	2	2	0	0	0.011	0.242	1
sP	2	2	0	0	0.011	0.23	0
IC	2	2	0	0	0.011	0.223	0
nIV	2	2	0	0	0.011	0.223	0
Hyoid	2	2	0	0	0.011	0.173	0
nA	2	1	1	0.005	0.011	0.243	0
nIXr	2	1	1	0.002	0.011	0.21	0
SpA	2	1	1	0	0.011	0.239	0
nHpC	2	1	1	0	0.011	0.232	0
Tu	2	1	1	0	0.011	0.232	0
Cochlea	2	0	2	0	0.011	0	0.5
Cornea	2	0	2	0	0.011	0	0
MD	2	0	2	0	0.011	0	0.5
nX	2	0	2	0	0.011	0	0
SON	2	0	2	0	0.011	0	0
VeD	2	0	2	0	0.011	0	0
OTu	1	1	0	0	0.005	0.235	0
Cloacal Muscles	1	1	0	0	0.005	0.228	0
Larynx	1	1	0	0	0.005	0.193	0
D	1	1	0	0	0.005	0.161	0
nIII	1	1	0	0	0.005	0.161	0
VeL	1	1	0	0	0.005	0.161	0
A8	1	0	1	0	0.005	0	0
Lungs	1	0	1	0	0.005	0	0
PLL	1	0	1	0	0.005	0	0
