# Supplementary material for: The Songbird Connectome (OSCINE-NET.ORG): Structure-Function Organization Beyond the Canonical Vocal Control Network
Source: Research Square preprint supplement (doi:10.21203/rs.3.rs-4809794/v1), 2024-08-27
Supplement: Supplementary file 3 [file 8002e746ff23b086dbfc34c1.xlsx]

## Sheet: Sheet1
Citation	Connections
Akutagawa, E., & Konishi, M. (2005). Connections of thalamic modulatory centers to the vocal control system of the zebra finch. Proceedings of the National Academy of Sciences of the United States of America, 102(39), 14086-14091. https://doi.org/10.1073/pnas.0506774102	3
Akutagawa, E., & Konishi, M. (2010). New brain pathways found in the vocal control system of a songbird. The Journal of comparative neurology, 518(15), 3086-3100. https://doi.org/10.1002/cne.22383	6
Alvarado, J. S., Hatfield, J., & Mooney, R. (2023). Divergent projections from locus coeruleus to the corticobasal ganglia system and ventral tegmental area of the adult male zebra finch. The Journal of comparative neurology, 531(8), 921-934. https://doi.org/10.1002/cne.25474	9
Appeltants, D., Absil, P., Balthazart, J., & Ball, G. F. (2000). Identification of the origin of catecholaminergic inputs to HVc in canaries by retrograde tract tracing combined with tyrosine hydroxylase immunocytochemistry. Journal of chemical neuroanatomy, 18(3), 117-133. https://doi.org/10.1016/s0891-0618(99)00054-x	5
Appeltants, D., Ball, G. F., & Balthazart, J. (2002). The origin of catecholaminergic inputs to the song control nucleus RA in canaries. Neuroreport, 13(5), 649-653. https://doi.org/10.1097/00001756-200204160-00023	7
Applegate, M. C., Gutnichenko, K. S., & Aronov, D. (2023). Topography of inputs into the hippocampal formation of a food-caching bird. Journal of Comparative Neurology, 531, 1669-1688. https://doi.org/10.1002/cne.25533	14
Applegate, M. C., Gutnichenko, K. S., Mackevicius, E. L., Aronov, D. (2023). An entorhinal-like region in food-caching birds. Current Biology, 33(12), 2465-2477.e7. https://doi.org/10.1016/j.cub.2023.05.031	12
Barr, H. J., Wall, E. M., & Woolley, S. C. (2021). Dopamine in the songbird auditory cortex shapes auditory preference. Current biology : CB, 31(20), 4547-4559.e5. https://doi.org/10.1016/j.cub.2021.08.005	5
Bauer, E. E., Coleman, M. J., Roberts, T. F., Roy, A., Prather, J. F., & Mooney, R. (2008). A synaptic basis for auditory-vocal integration in the songbird. The Journal of neuroscience : the official journal of the Society for Neuroscience, 28(6), 1509-1522. https://doi.org/10.1523/JNEUROSCI.3838-07.2008	4
Ben-Tov, M., Duarte, F., & Mooney, R. (2023). A neural hub for holistic courtship displays. Current biology : CB, 33(9), 1640-1653.e5. https://doi.org/10.1016/j.cub.2023.02.072	7
Bischof, H. J., Eckmeier, D., Keary, N., Löwel, S., Mayer, U., & Michael, N. (2016). Multiple Visual Field Representations in the Visual Wulst of a Laterally Eyed Bird, the Zebra Finch *Taeniopygia guttata). PloS one, 11(5), e0154927. https://doi.org/10.1371/journal.pone.0154927	3
Bischof, HJ., Niemann, J. (1990). Contralateral projections of the optic tectum in the zebra finch *Taenopygia guttata castanotis). Cell and Tissue Research, 262, 307-313. https://doi.org/10.1007/BF00309886	24
Bloomston, N. A., Zaharas, K., Lawley, K., Fenn, T., Person, E., Huber, H., Zhang, Z., & Prather, J. F. (2022). Exploring links from sensory perception to movement and behavioral motivation in the caudal nidopallium of female songbirds. The Journal of comparative neurology, 530(10), 1622-1633. https://doi.org/10.1002/cne.25305	4
Bottjer, S. W., & Altenau, B. (2010). Parallel pathways for vocal learning in basal ganglia of songbirds. Nature neuroscience, 13(2), 153-155. https://doi.org/10.1038/nn.2472	2
Bottjer, S. W., Alderete, T. L., & Chang, D. (2010). Conjunction of vocal production and perception regulates expression of the immediate early gene ZENK in a novel cortical region of songbirds. Journal of neurophysiology, 103(4), 1833-1842. https://doi.org/10.1152/jn.00869.2009	1
Bottjer, S. W., Brady, J. D., & Cribbs, B. (2000). Connections of a motor cortical region in zebra finches: relation to pathways for vocal learning. The Journal of comparative neurology, 420(2), 244-260. https://doi.org/10.1002/(SICI)1096-9861(20000501)420:2<244::AID-CNE7>3.0.CO;2-M	37
Bottjer, S. W., Halsema, K. A., Brown, S. A., & Miesner, E. A. (1989). Axonal connections of a forebrain nucleus involved with vocal learning in zebra finches. The Journal of comparative neurology, 279(2), 312-326. https://doi.org/10.1002/cne.902790211	11
Cassone, V. M., & Moore, R. Y. (1987). Retinohypothalamic projection and suprachiasmatic nucleus of the house sparrow, Passer domesticus. The Journal of comparative neurology, 266(2), 171-182. https://doi.org/10.1002/cne.902660204	2
Castelino, C. B., Diekamp, B., & Ball, G. F. (2007). Noradrenergic projections to the song control nucleus area X of the medial striatum in male zebra finches (Taeniopygia guttata). The Journal of comparative neurology, 502(4), 544-562. https://doi.org/10.1002/cne.21337	30
Chen, R., Puzerey, P. A., Roeser, A. C., Riccelli, T. E., Podury, A., Maher, K., Farhang, A. R., & Goldberg, J. H. (2019). Songbird Ventral Pallidum Sends Diverse Performance Error Signals to Dopaminergic Midbrain. Neuron, 103(2), 266-276.e4. https://doi.org/10.1016/j.neuron.2019.04.038	11
Cheng, M., Chaiken, M., Zuo, M., & Miller, H. (1999). Nucleus taenia of the amygdala of birds: anatomical and functional studies in ring doves (Streptopelia risoria) and European Starlings (Sturnus vulgaris). Brain, behavior and evolution, 53(5-6), 243-270. https://doi.org/10.1159/000006597	21
Coleman, M. J., Roy, A., Wild, J. M., & Mooney, R. (2007). Thalamic gating of auditory responses in telencephalic song control nuclei. The Journal of neuroscience : the official journal of the Society for Neuroscience, 27(37), 10024-10036. https://doi.org/10.1523/JNEUROSCI.2215-07.2007	8
Das, A., & Goldberg, J. H. (2022). Songbird subthalamic neurons project to dopaminergic midbrain and exhibit singing-related activity. Journal of neurophysiology, 127(2), 373-383. https://doi.org/10.1152/jn.00254.2021	6
Dunning, J. L., Maze, S. E., Atwood, E. J., & Prather, J. F. (2018). Caudal mesopallial neurons in female songbirds bridge sensory and motor brain regions. The Journal of comparative neurology, 526(10), 1703-1711. https://doi.org/10.1002/cne.24440	5
Faunes, M., & Wild, J. M. (2017). The ascending projections of the nuclei of the descending trigeminal tract (nTTD) in the zebra finch (Taeniopygia guttata). The Journal of comparative neurology, 525(13), 2832-2846. https://doi.org/10.1002/cne.24247	84
Faunes, M., Botelho, J. F., & Wild, J. M. (2017). Innervation of the syrinx of the zebra finch (Taeniopygia guttata). The Journal of comparative neurology, 525(13), 2847-2860. https://doi.org/10.1002/cne.24236	4
Faunes, M., Fernández, S., Gutiérrez-Ibáñez, C., Iwaniuk, A. N., Wylie, D. R., Mpodozis, J., Karten, H. J., & Marín, G. (2013). Laminar segregation of GABAergic neurons in the avian nucleus isthmi pars magnocellularis: a retrograde tracer and comparative study. The Journal of comparative neurology, 521(8), 1727-1742. https://doi.org/10.1002/cne.23253	7
Feyerabend, B., Malz, C. R., & Meyer, D. L. (1994). Birds that feed-on-the-wing have few isthmo-optic neurons. Neuroscience letters, 182(1), 66-68. https://doi.org/10.1016/0304-3940(94)90207-0	2
Fortune, E. S., & Margoliash, D. (1995). Parallel pathways and convergence onto HVc and adjacent neostriatum of adult zebra finches (Taeniopygia guttata). The Journal of comparative neurology, 360(3), 413-441. https://doi.org/10.1002/cne.903600305	22
Foster, E. F., & Bottjer, S. W. (1998). Axonal connections of the high vocal center and surrounding cortical regions in juvenile and adult male zebra finches. The Journal of comparative neurology, 397(1), 118-138. https://doi.org/10.1002/(SICI)1096-9861(19980720)397:1<118::AID-CNE9>3.0.CO;2-3	31
Foster, E. F., Mehta, R. P., & Bottjer, S. W. (1997). Axonal connections of the medial magnocellular nucleus of the anterior neostriatum in zebra finches. The Journal of comparative neurology, 382(3), 364-381. https://doi.org/10.1002/cne.903820305	14
Gaede, A. H., Gutierrez-Ibanez, C., Armstrong, M. S., Altshuler, D. L., & Wylie, D. R. (2019). Pretectal projections to the oculomotor cerebellum in hummingbirds (Calypte anna), zebra finches *Taeniopygia guttata), and pigeons (Columba livia). The Journal of comparative neurology, 527(16), 2644-2658. https://doi.org/10.1002/cne.24697	10
Gaede, A. H., Gutiérrez-Ibáñez, C., Wu, P. H., Pilon, M. C., Altshuler, D. L., & Wylie, D. R. (2024). Topography of visual and somatosensory inputs to the pontine nuclei in zebra finches (Taeniopygia guttata). The Journal of comparative neurology, 532(2), e25556. https://doi.org/10.1002/cne.25556	24
Gale, S. D., Person, A. L., & Perkel, D. J. (2008). A novel basal ganglia pathway forms a loop linking a vocal learning circuit with its dopaminergic input. The Journal of comparative neurology, 508(5), 824-839. https://doi.org/10.1002/cne.21700	13
Gutierrez-Ibanez, C., Gaede, A. H., Dannish, M. R., Altshuler, D. L., & Wylie, D. R. (2018). The retinal projection to the nucleus lentiformis mesencephali in zebra finch (Taeniopygia guttata) and Anna's hummingbird (Calypte anna). Journal of comparative physiology. A, Neuroethology, sensory, neural, and behavioral physiology, 204(4), 369–376. https://doi.org/10.1007/s00359-018-1245-5	3
Haase, K., Musielak, I., Warmuth-Moles, L., Leberecht, B., Zolotareva, A., Mouritsen, H., & Heyers, D. (2022). In Search for the Avian Trigeminal Magnetic Sensor: Distribution of Peripheral and Central Terminals of Ophthalmic Sensory Neurons in the Night-Migratory Eurasian Blackcap (Sylvia atricapilla). Frontiers in neuroanatomy, 16, 853401. https://doi.org/10.3389/fnana.2022.853401	1
Hartwig H. G. (1974). Electron microscopic evidence for a retinohypothalamic projection to the suprachiasmatic nucleus of Passer domesticus. Cell and tissue research, 153(1), 89-99. https://doi.org/10.1007/BF00225448	1
Heyers, D., Musielak, I., Haase, K., Herold, C., Bolte, P., Güntürkün, O., & Mouritsen, H. (2022). Morphology, biochemistry and connectivity of Cluster N and the hippocampal formation in a migratory bird. Brain structure & function, 227(8), 2731–2749. https://doi.org/10.1007/s00429-022-02566-y	12
Hsiao, Y. T., Chen, T. C., Yu, P. H., Huang, D. S., Hu, F. R., Chuong, C. M., & Chang, F. C. (2020). Connectivity between nidopallium caudolateral and visual pathways in color perception of zebra finches. Scientific reports, 10(1), 19382. https://doi.org/10.1038/s41598-020-76542-z	3
Katic, J., Morohashi, Y., & Yazaki-Sugiyama, Y. (2022). Neural circuit for social authentication in song learning. Nature communications, 13(1), 4442. https://doi.org/10.1038/s41467-022-32207-1	4
Kearney, M. G., Warren, T. L., Hisey, E., Qi, J., & Mooney, R. (2019). Discrete Evaluative and Premotor Circuits Enable Vocal Learning in Songbirds. Neuron, 104(3), 559-575.e6. https://doi.org/10.1016/j.neuron.2019.07.025	3
Kelley, D. B., & Nottebohm, F. (1979). Projections of a telencephalic auditory nucleus-field L-in the canary. The Journal of comparative neurology, 183(3), 455–469. https://doi.org/10.1002/cne.901830302	7
Kersten, Y., Moll, F. W., Erdle, S., & Nieder, A. (2024). Input and Output Connections of the Crow Nidopallium Caudolaterale. eNeuro, 11(4), ENEURO.0098-24.2024. https://doi.org/10.1523/ENEURO.0098-24.2024	31
Kiss, J. Z., Voorhuis, T. A., van Eekelen, J. A., de Kloet, E. R., & de Wied, D. (1987). Organization of vasotocin-immunoreactive cells and fibers in the canary brain. The Journal of comparative neurology, 263(3), 347–364. https://doi.org/10.1002/cne.902630304	1
Kobylkov, D., Schwarze, S., Michalik, B., Winklhofer, M., Mouritsen, H., & Heyers, D. (2020). A newly identified trigeminal brain pathway in a night-migratory bird could be dedicated to transmitting magnetic map information. Proceedings. Biological sciences, 287(1919), 20192788. https://doi.org/10.1098/rspb.2019.2788	5
Korf, H. W., Zimmerman, N. H., & Oksche, A. (1982). Intrinsic neurons and neural connections of the pineal organ of the house sparrow, Passer domesticus, as revealed by anterograde and retrograde transport of horseradish peroxidase. Cell and tissue research, 222(2), 243-260. https://doi.org/10.1007/BF00213210	3
Kreck, G., & Nixdorf-Bergweiler, B. E. (2005). Evidence for a cortical-basal ganglia projection pathway in female zebra finches. Neuroreport, 16(1), 21–24. https://doi.org/10.1097/00001756-200501190-00006	1
Krützfeldt, N. O., & Wild, J. M. (2004). Definition and connections of the entopallium in the zebra finch *Taeniopygia guttata). The Journal of comparative neurology, 468(3), 452-465. https://doi.org/10.1002/cne.10972	8
Krützfeldt, N. O., Logerot, P., Kubke, M. F., & Wild, J. M. (2010). Connections of the auditory brainstem in a songbird, Taeniopygia guttata. I. Projections of nucleus angularis and nucleus laminaris to the auditory torus. The Journal of comparative neurology, 518(11), 2109-2134. https://doi.org/10.1002/cne.22334	18
Krützfeldt, N. O., Logerot, P., Kubke, M. F., & Wild, J. M. (2010). Connections of the auditory brainstem in a songbird, Taeniopygia guttata. II. Projections of nucleus angularis and nucleus laminaris to the superior olive and lateral lemniscal nuclei. The Journal of comparative neurology, 518(11), 2135–2148. https://doi.org/10.1002/cne.22324	9
Kubke, M. F., Ross, J. M., & Wild, J. M. (2004). Vagal innervation of the air sacs in a songbird, Taenopygia guttata. Journal of anatomy, 204(4), 283-292. https://doi.org/10.1111/j.0021-8782.2004.00286.x	4
Lewis, J. W., Ryan, S. M., Arnold, A. P., & Butcher, L. L. (1981). Evidence for a catecholaminergic projection to area X in the zebra finch. The Journal of comparative neurology, 196(2), 347-354. https://doi.org/10.1002/cne.901960212	6
Li, R., & Sakaguchi, H. (1997). Cholinergic innervation of the song control nuclei by the ventral paleostriatum in the zebra finch: a double-labeling study with retrograde fluorescent tracers and choline acetyltransferase immunohistochemistry. Brain research, 763(2), 239-246. https://doi.org/10.1016/s0006-8993(97)00417-4	12
Li, R., Zuo, M. X., & Sakaguchi, H. (1999). Auditory-vocal cholinergic pathway in zebra finch brain. Neuroreport, 10(1), 165-169. https://doi.org/10.1097/00001756-199901180-00032	9
Luo, M., Ding, L., & Perkel, D. J. (2001). An avian basal ganglia pathway essential for vocal learning forms a closed topographic loop. The Journal of neuroscience: the official journal of the Society for Neuroscience, 21(17), 6836-6845. https://doi.org/10.1523/JNEUROSCI.21-17-06836.2001	5
Mandelblat-Cerf, Y., Las, L., Denisenko, N., & Fee, M. S. (2014). A role for descending auditory cortical projections in songbird vocal learning. eLife, 3, e02152. https://doi.org/10.7554/eLife.02152	7
Meier R. E. (1973). Autoradiographic evidence for a direct retino-hypothalamic projection in the avian brain. Brain research, 53(2), 417-421. https://doi.org/10.1016/0006-8993(73)90226-6	3
Mello, C. V., Vates, G. E., Okuhata, S., & Nottebohm, F. (1998). Descending auditory pathways in the adult male zebra finch (Taeniopygia guttata). The Journal of comparative neurology, 395(2), 137-160. https://doi.org/10.1002/(SICI)1096-9861(19980601)395:2<137::AID-CNE1>3.0.CO;2-3	24
Miller-Sims, V. C., & Bottjer, S. W. (2012). Auditory experience refines cortico-basal ganglia inputs to motor cortex via remapping of single axons during vocal learning in zebra finches. Journal of neurophysiology, 107(4), 1142-1156. https://doi.org/10.1152/jn.00614.2011	3
Nicholson, D.A., Roberts, T.F., & Sober, S.J. (2018). Thalamostriatal and cerebellothalamic pathways in a songbird, the Bengalese Finch. The Journal of comparative neurology, 526(9), 1550-1570. https://doi.org/10.1002/cne.24428	11
Nixdorf, B. E., & Bischof, H. J. (1982). Afferent connections of the ectostriatum and visual wulst in the zebra finch (Taeniopygia guttata castanotis Gould)--an HRP study. Brain research, 248(1), 9-17. https://doi.org/10.1016/0006-8993(82)91142-8	16
Nordeen, E. J., Grace, A., Burek, M. J., & Nordeen, K. W. (1992). Sex-dependent loss of projection neurons involved in avian song learning. Journal of neurobiology, 23(6), 671–679. https://doi.org/10.1002/neu.480230606	1
Paterson, A. K., & Bottjer, S. W. (2017). Cortical inter-hemispheric circuits for multimodal vocal learning in songbirds. The Journal of comparative neurology, 525(15), 3312-3340. https://doi.org/10.1002/cne.24280	14
Person, A. L., Gale, S. D., Farries, M. A., & Perkel, D. J. (2008). Organization of the songbird basal ganglia, including area X. The Journal of comparative neurology, 508(5), 840-866. https://doi.org/10.1002/cne.21699	40
Pidoux, L., Le Blanc, P., Levenes, C., & Leblois, A. (2018). A subcortical circuit linking the cerebellum to the basal ganglia engaged in vocal learning. eLife, 7, e32167. https://doi.org/10.7554/eLife.32167	5
Polzin, B. J., Maksimoski, A. N., Stevenson, S. A., Zhao, C., & Riters, L. V. (2022). Mu opioid receptor stimulation in the medial preoptic area or nucleus accumbens facilitates song and reward in flocking European Starlings. Frontiers in physiology, 13, 970920. https://doi.org/10.3389/fphys.2022.970920	1
Reinke, H. and Wild, J.M. (1998), Identification and connections of inspiratory premotor neurons in songbirds and budgerigar. J. Comp. Neurol., 391: 147-163. https://doi.org/10.1002/(SICI)1096-9861(19980209)391:2<147::AID-CNE1>3.0.CO;2-2	40
Riters, L. V., & Alger, S. J. (2004). Neuroanatomical evidence for indirect connections between the medial preoptic nucleus and the song control system: possible neural substrates for sexually motivated song. Cell and tissue research, 316(1), 35-44. https://doi.org/10.1007/s00441-003-0838-6	37
Roberts, T. F., Hisey, E., Tanaka, M., Kearney, M. G., Chattree, G., Yang, C. F., Shah, N. M., & Mooney, R. (2017). Identification of a motor-to-auditory pathway important for vocal learning. Nature neuroscience, 20(7), 978-986. https://doi.org/10.1038/nn.4563	4
Roeser, A., Teoh, H. K., Chen, R., Cohen, I., & Goldberg, J. (2023). The songbird lateral habenula projects to dopaminergic midbrain and is important for normal vocal development. eLife, 12, RP90392. https://doi.org/10.7554/eLife.90392.1	6
Sadananda, M., & Bischof, H. J. (2006). Afferentation of the lateral nidopallium: A tracing study of a brain area involved in sexual imprinting in the zebra finch (Taeniopygia guttata). Brain research, 1106(1), 111-122. https://doi.org/10.1016/j.brainres.2006.04.009	36
Sadananda, M., Korte, S., & Bischof, H. J. (2007). Afferentation of a caudal forebrain area activated during courtship behavior: a tracing study in the zebra finch (Taeniopygia guttata). Brain research, 1184, 108-120. https://doi.org/10.1016/j.brainres.2007.09.040	42
Shaughnessy, D. W., Hyson, R. L., Bertram, R., Wu, W., & Johnson, F. (2019). Female zebra finches do not sing yet share neural pathways necessary for singing in males. The Journal of comparative neurology, 527(4), 843-855. https://doi.org/10.1002/cne.24569	8
Singletary, K. G., Deviche, P., Strand, C., & Delville, Y. (2006). Distribution of orexin/hypocretin immunoreactivity in the brain of a male songbird, the house finch, Carpodacus mexicanus. Journal of chemical neuroanatomy, 32(2-4), 81-89. https://doi.org/10.1016/j.jchemneu.2006.05.003	39
Striedter, G. F., & Vu, E. T. (1998). Bilateral feedback projections to the forebrain in the premotor network for singing in zebra finches. Journal of neurobiology, 34(1), 27-40. https://doi.org/10.1002/(SICI)1097-4695(199801)34:1%3C27::AID-NEU3%3E3.0.CO;2-E	23
Székely A. D. (1999). The avian hippocampal formation: subdivisions and connectivity. Behavioural brain research, 98(2), 219-225. https://doi.org/10.1016/s0166-4328(98)00087-4	22
Székely, A. D., & Krebs, J. R. (1996). Efferent connectivity of the hippocampal formation of the zebra finch (Taenopygia guttata): an anterograde pathway tracing study using Phaseolus vulgaris leucoagglutinin. The Journal of comparative neurology, 368(2), 198-214. https://doi.org/10.1002/(SICI)1096-9861(19960429)368:2<198::AID-CNE3>3.0.CO;2-Z	48
Tanaka, M., Sun, F., Li, Y., & Mooney, R. (2018). A mesocortical dopamine circuit enables the cultural transmission of vocal behaviour. Nature, 563(7729), 117-120. https://doi.org/10.1038/s41586-018-0636-7	6
Tobari Y, Okumura T, Tani J, and K Okanoya (2006). Non-singing female Bengalese Finches (Lonchura striata var. domestica) possess neuronal projections connecting a song learning region to a song motor region. Ornithol Sci 5(1): 47-55. https://doi.org/10.2326/osj.5.47	5
Trusel M, Alam D, & Roberts TF (2022). Synaptic connectivity of afferent inputs onto projection neurons in the songbird HVC. biorxiv, doi: 10.1101/2022.11.08.515692	7
Trusel, M., Zhao, Z., Alam, D., Marks, E., Ikeda, M., Roberts, T. F. (2024) bioRxiv 2022.11.08.515692; doi: https://doi.org/10.1101/2022.11.08.515692	1
Ubuka, T., Mukai, M., Wolfe, J., Beverly, R., Clegg, S., Wang, A., Hsia, S., Li, M., Krause, J. S., Mizuno, T., Fukuda, Y., Tsutsui, K., Bentley, G. E., & Wingfield, J. C. (2012). RNA interference of gonadotropin-inhibitory hormone gene induces arousal in songbirds. PloS one, 7(1), e30202. https://doi.org/10.1371/journal.pone.0030202	12
Vates, G. E., & Nottebohm, F. (1995). Feedback circuitry within a song-learning pathway. Proceedings of the National Academy of Sciences of the United States of America, 92(11), 5139-5143. https://doi.org/10.1073/pnas.92.11.5139	4
Vates, G. E., Broome, B. M., Mello, C. V., & Nottebohm, F. (1996). Auditory pathways of caudal telencephalon and their relation to the song system of adult male zebra finches. The Journal of comparative neurology, 366(4), 613-642. https://doi.org/10.1002/(SICI)1096-9861(19960318)366:4<613::AID-CNE5>3.0.CO;2-7	69
Vates, G. E., Vicario, D. S., & Nottebohm, F. (1997). Reafferent thalamo- "cortical" loops in the song system of oscine songbirds. The Journal of comparative neurology, 380(2), 275-290. https://doi.org/10.1002/(SICI)1096-9861(19970407)380:2<275::AID-CNE9>3.0.CO;2-0	14
Wild J. M. (1990). Peripheral and central terminations of hypoglossal afferents innervating lingual tactile mechanoreceptor complexes in Fringillidae. The Journal of comparative neurology, 298(2), 157-171. https://doi.org/10.1002/cne.902980203	5
Wild J. M. (1993). Descending projections of the songbird nucleus robustus archistriatalis. The Journal of comparative neurology, 338(2), 225-241. https://doi.org/10.1002/cne.903380207	10
Wild J. M. (1994). Visual and somatosensory inputs to the avian song system via nucleus uvaeformis (Uva) and a comparison with the projections of a similar thalamic nucleus in a nonsongbird, Columba livia. The Journal of comparative neurology, 349(4), 512-535. https://doi.org/10.1002/cne.903490403	19
Wild J. M. (1997). The avian somatosensory system: the pathway from wing to Wulst in a passerine (Chloris chloris). Brain research, 759(1), 122-134. https://doi.org/10.1016/s0006-8993(97)00253-9	18
Wild J. M. (2017). Dorsal pallidal neurons directly link the nidopallium and midbrain in the zebra finch *Taeniopygia guttata). The Journal of comparative neurology, 525(7), 1731-1742. https://doi.org/10.1002/cne.24174	44
Wild, J. M., & Botelho, J. F. (2015). Involvement of the avian song system in reproductive behaviour. Biology letters, 11(12), 20150773. https://doi.org/10.1098/rsbl.2015.0773	3
Wild, J. M., & Farabaugh, S. M. (1996). Organization of afferent and efferent projections of the nucleus basalis prosencephali in a passerine, Taeniopygia guttata. The Journal of comparative neurology, 365(2), 306-328. https://doi.org/10.1002/(SICI)1096-9861(19960205)365:2<306::AID-CNE8>3.0.CO;2-9	33
Wild, J. M., & Gaede, A. H. (2016). Second tectofugal pathway in a songbird (Taeniopygia guttata) revisited: Tectal and lateral pontine projections to the posterior thalamus, thence to the intermediate nidopallium. The Journal of comparative neurology, 524(5), 963-985. https://doi.org/10.1002/cne.23886	23
Wild, J. M., & Krützfeldt, N. E. (2012). Trigeminal and telencephalic projections to jaw and other upper vocal tract premotor neurons in songbirds: sensorimotor circuitry for beak movements during singing. The Journal of comparative neurology, 520(3), 590-605. https://doi.org/10.1002/cne.22752	58
Wild, J. M., & Williams, M. N. (1999). Rostral wulst of passerine birds: II. Intratelencephalic projections to nuclei associated with the auditory and song systems. The Journal of comparative neurology, 413(4), 520-534. https://doi.org/10.1002/(sici)1096-9861(19991101)413:4<520::aid-cne3>3.0.co;2-b	41
Wild, J. M., & Williams, M. N. (2000). A direct cerebrocerebellar projection in adult birds and rats. Neuroscience, 96(2), 333-339. https://doi.org/10.1016/s0306-4522(99)00546-1	38
Wild, J. M., & Williams, M. N. (2000). Rostral wulst in passerine birds. I. Origin, course, and terminations of an avian pyramidal tract. The Journal of comparative neurology, 416(4), 429–450. https://doi.org/10.1002/(SICI)1096-9861(20000124)416:4<429::AID-CNE2>3.0.CO;2-X	34
Wild, J. M., Krützfeldt, N. O., & Kubke, M. F. (2009). Afferents to the cochlear nuclei and nucleus laminaris from the ventral nucleus of the lateral lemniscus in the zebra finch (Taeniopygia guttata). Hearing research, 257(1-2), 1-7. https://doi.org/10.1016/j.heares.2009.07.007	11
Wild, J. M., Krützfeldt, N. O., & Kubke, M. F. (2010). Connections of the auditory brainstem in a songbird, Taeniopygia guttata. III. Projections of the superior olive and lateral lemniscal nuclei. The Journal of comparative neurology, 518(11), 2149-2167. https://doi.org/10.1002/cne.22325	26
Wild, J. M., Kubke, M. F., & Mooney, R. (2009). Avian nucleus retroambigualis: cell types and projections to other respiratory-vocal nuclei in the brain of the zebra finch (Taeniopygia guttata). The Journal of comparative neurology, 512(6), 768-783. https://doi.org/10.1002/cne.21932	27
Wild, J. M., Li, D., & Eagleton, C. (1997). Projections of the dorsomedial nucleus of the intercollicular complex (DM) in relation to respiratory-vocal nuclei in the brainstem of pigeon (Columba livia) and zebra finch (Taeniopygia guttata). The Journal of comparative neurology, 377(3), 392-413. https://doi.org/10.1002/(sici)1096-9861(19970120)377:3<392::aid-cne7>3.0.co;2-y	17
Wu, M.T.N. (2023). Dopaminergic modulation of pair bonds and song preference learning in the female zebra finch. (Master's Dissertation). McGill University, Retrieved from https://escholarship.mcgill.ca/concern/theses/8s45qg20z	2
Wu, P.-H. (2020). Neural projections from midbrain optic flow nuclei to the inferior olive and vestibulocerebellum of zebra finches (Taeniopygia guttata) (Doctoral dissertation). University of British Columbia. Retrieved from https://open.library.ubc.ca/collections/ubctheses/24/items/1.0395459	8
Wylie, D. R., Gaede, A. H., Gutiérrez-Ibáñez, C., Wu, P. H., Pilon, M. C., Azargoon, S., & Altshuler, D. L. (2023). Topography of optic flow processing in olivo-cerebellar pathways in zebra finches (Taeniopygia guttata). The Journal of comparative neurology, 531(6), 640-662. https://doi.org/10.1002/cne.25454	20
Yeh, Y.-T. (2022). Auditory Tuning in Vocal Learning Songbirds. (Doctoral dissertation). Columbia University. Retrieved from https://academiccommons.columbia.edu/doi/10.7916/1hh4-4z76/download	5
Yip, Z. C., Miller-Sims, V. C., & Bottjer, S. W. (2012). Morphology of axonal projections from the high vocal center to vocal motor cortex in songbirds. The Journal of comparative neurology, 520(12), 2742-2756. https://doi.org/10.1002/cne.23084	5
Zeng, S., Zhang, X., Peng, W., & Zuo, M. (2004). Immunohistochemistry and neural connectivity of the Ov shell in the songbird and their evolutionary implications. The Journal of comparative neurology, 470(2), 192-209. https://doi.org/10.1002/cne.11042	22
Zhao, W. (2019). Finding the engram: A pathway for song memory in zebra finches.(Doctoral dissertation). The University of Texas Southwestern Medical Center. Retrieved from https://utswmed-ir.tdl.org/server/api/core/bitstreams/5effac68-bb3d-4478-8cc3-4a3c18253e66/content	3
